# Supplementary material for: Machine Learning-Based Metabolic Pattern Recognition Predicts Mode of Action for Anti-Cancer Drug Candidates
Source: Research Square preprint supplement (doi:10.21203/rs.3.rs-3494185/v1), 2024-01-26
Supplement: Supplementary file 1 [file 42c734be6732754f2e7b65ad.docx]

**Table S4.** Binding affinity of triterpenoid ligands to the CEPT1 and CPT1 in comparison to the native substrate CDP-Choline

|  | [kcal mol-1] | |
| --- | --- | --- |
|  | **CEPT1** | **CPT1** |
| Betulinic acid | -8.33 | -7.31 |
| 11-Keto-beta-boswellic acid | -7.3 | -6.17 |
| Glycyrrhetinic acid | -7.6 | -7.68 |
| Maslinic acid | -7.4 | -6.13 |
| Ursolic acid | -8.66 | -7.44 |
| CDP-Choline | -7.14 | -8.33 |
