# Supplementary material for: Machine Learning-Based Metabolic Pattern Recognition Predicts Mode of Action for Anti-Cancer Drug Candidates
Source: Research Square preprint supplement (doi:10.21203/rs.3.rs-3494185/v1), 2024-01-26
Supplement: Supplementary file 2 [file 94ecef48327e52a3471ad35f.xlsx]

## Sheet: lipidomics individual data
Table S5. Cell number-normalized lipidomics data of control, BA and AAHR treated PC-3
																																Class	AAHR	AAHR	AAHR	AAHR	AAHR	Betulininc acid	Betulininc acid	Betulininc acid	Betulininc acid	Betulininc acid	Control	Control	Control	Control	Control
																																Batch ID																Average	Average
Alignment ID	Average Rt(min)	Average Mz	mz;r.t.	Metabolite name	Adduct type	Post curation result	Fill %	MS/MS assigned	Reference RT	Reference m/z	Formula	Ontology	INCHIKEY	SMILES	Annotation tag (VS1.0)	RT matched	m/z matched	MS/MS matched	Comment	Manually modified for quantification	Manually modified for annotation	Isotope tracking parent ID	Isotope tracking weight number	Total score	RT similarity	Dot product	Reverse dot product	Fragment presence %	S/N average	Spectrum reference file name	MS1 isotopic spectrum	MS/MS spectrum	Lipidomics_pos_AH_01	Lipidomics_pos_AH_02	Lipidomics_pos_AH_03	Lipidomics_pos_AH_04	Lipidomics_pos_AH_05	Lipidomics_pos_BL_01	Lipidomics_pos_BL_02	Lipidomics_pos_BL_03	Lipidomics_pos_BL_04	Lipidomics_pos_BL_05	Lipidomics_pos_CON_01	Lipidomics_pos_CON_02	Lipidomics_pos_CON_03	Lipidomics_pos_CON_04	Lipidomics_pos_CON_05	AAHR	Betulininc acid
0	7.805	71.0853	71.08525_7.805	Unknown	[M+H]+	similar chromatogram in higher mz_1; similar chromatogram in higher mz_153; similar chromatogram in higher mz_163; similar chromatogram in higher mz_164; similar chromatogram in higher mz_1307; similar chromatogram in higher mz_1455; found in higher mz's MsMs_119	0.067	False	null	null	null	null	null	null	999	False	False	False		False	False	null	null	null	null	null	null	null	105.36	Lipidomics_pos_AH_02	71.08525:1120 72.0886:0 73.09196:0		1638.3	2382.98	1555.32	2100	1951.06	1248.21	1266.07	1494.64	1175	1753.57	1015	942	981	1016	946	1925.69	1387.21
1	7.791	113.132	113.13185_7.791	Unknown	[M+H]+	similar chromatogram in higher mz_53; found in higher mz's MsMs_164; similar chromatogram in higher mz_163; similar chromatogram in higher mz_153; similar chromatogram in higher mz_1455; similar chromatogram in higher mz_181	1	True	null	null	null	null	null	null	999	False	False	False		False	False	null	null	null	null	null	null	null	102.36	Lipidomics_pos_AH_01	113.13154:1962 114.13489:216 115.13825:0	80.04837:12 95.05804:18	4174.47	5617.02	4321.28	5476.6	4523.4	3394.64	3255.36	3439.29	3396.43	3942.86	2585	2695	2512	2400	2609	4822.66	3485.98
2	2.945	117.069	117.06896_2.945	Unknown	[M+H]+	similar chromatogram in higher mz_70; found in higher mz's MsMs_70	1	True	null	null	null	null	null	null	999	False	False	False		False	False	null	null	null	null	null	null	null	127.62	Lipidomics_pos_AH_01	117.06939:1586 118.07274:267 119.0761:0	89.03728:38 115.05433:1824	3374.47	3438.3	3206.38	3163.83	2802.13	2483.93	2619.64	2333.93	2058.93	2200	1337	1276	1579	1419	1524	3197.29	2338.97
3	1.657	119.085	119.08504_1.657	w/o MS2:RIKEN P-VS1 ID-134 from Mouse_Macrophage_WT_N_F1AA	[M+H]+	found in higher mz's MsMs_139; similar chromatogram in higher mz_178; similar chromatogram in higher mz_174; similar chromatogram in higher mz_290; similar chromatogram in higher mz_177; found in higher mz's MsMs_177; similar chromatogram in higher mz_286; similar chromatogram in higher mz_349; similar chromatogram in higher mz_206; found in higher mz's MsMs_206; found in higher mz's MsMs_122; si…	0.067	False	6.16	119.085		Unknown			530	True	True	False		False	False	null	null	99.9	99.9	null	null	null	85.52	Lipidomics_pos_CON_01	119.08504:1211 120.08839:0 121.09175:0		1268.09	1204.26	948.936	1127.66	1100	941.071	1205.36	1050	833.929	819.643	1211	838	678	564	439	1129.57	969.777
4	21.518	132.904	132.90427_21.518	Unknown	[M+H]+		0.067	False	null	null	null	null	null	null	999	False	False	False		False	False	null	null	null	null	null	null	null	4.08	Lipidomics_pos_AH_02	132.90427:4742 133.90762:0 134.91098:0		6019.15	10089.4	8455.32	5440.43	5606.38	3519.64	4355.36	4425	5601.79	6485.71	3978	2989	3203	2748	2923	7122.21	4877.23
5	2.475	149.023	149.02289_2.475	Unknown	[M+H]+	similar chromatogram in higher mz_29; similar chromatogram in higher mz_125; similar chromatogram in higher mz_285; similar chromatogram in higher mz_54; found in higher mz's MsMs_54	1	True	null	null	null	null	null	null	999	False	False	False		False	False	null	null	null	null	null	null	null	19.35	Lipidomics_pos_AH_01	149.02287:4385 150.02622:472 151.02958:40	65.0382:263 93.03227:177 121.02762:83 121.03187:61 149.02245:218	9329.79	9980.85	8687.23	8838.3	10008.5	6464.29	6694.64	9083.93	9855.36	7116.07	5103	5378	5946	5365	4806	9369.41	7843.08
6	7.789	149.023	149.02293_7.789	Unknown	[M+H-H2O]+	found in higher mz's MsMs_119; found in higher mz's MsMs_1307; adduct linked to 7_[M+H]+; found in higher mz's MsMs_164; found in higher mz's MsMs_53; found in higher mz's MsMs_50; found in higher mz's MsMs_135	1	True	null	null	null	null	null	null	999	False	False	False		False	False	null	null	null	null	null	null	null	238.4	Lipidomics_pos_AH_01	149.02296:47993 150.02631:4214 151.02967:607	65.01971:17 65.03815:970 93.03349:431 121.01443:31 121.02783:513 121.03904:33 149.0235:539	102113	111838	99919.1	118940	99172.3	76383.9	78533.9	79198.2	73971.4	82153.6	56482	52991	52944	51256	54413	106397	78048.3
7	7.788	167.033	167.03348_7.788	Unknown	[M+H]+	adduct linked to 6_[M+H-H2O]+	1	True	null	null	null	null	null	null	999	False	False	False		False	False	null	null	null	null	null	null	null	128.93	Lipidomics_pos_AH_01	167.03348:8749 168.03683:773 169.04019:280	137.10625:17	18614.9	21021.3	18038.3	20938.3	19191.5	14614.3	14932.1	14951.8	12867.9	15505.4	11010	9755	9931	10011	10585	19560.8	14574.1
8	11.77	184.072	184.07227_11.77	w/o MS2:Phosphocholine	[M+H]+		0.067	False	0.631	184.073	C5H14NO4P	Others	YHHSONZFOIEMCP-UHFFFAOYSA-N	C[N+](C)(C)CCOP(O)([O-])=O	530	True	True	False		False	False	null	null	99.4	99.4	null	null	null	61.79	Lipidomics_pos_AH_03	184.07227:1321 185.07562:0 186.07898:0		1961.7	1808.51	2810.64	1965.96	1836.17	1721.43	1123.21	925	933.929	925	1706	602	1738	1275	1300	2076.17	1125.96
9	11.635	184.073	184.07256_11.635	w/o MS2:Phosphocholine	[M+H]+		0.2	False	0.631	184.073	C5H14NO4P	Others	YHHSONZFOIEMCP-UHFFFAOYSA-N	C[N+](C)(C)CCOP(O)([O-])=O	530	True	True	False		False	False	null	null	99.7	99.4	null	null	null	70.14	Lipidomics_pos_CON_02	184.07256:2192 185.07591:0 186.07927:0		1961.7	1725.53	1821.28	1606.38	1142.55	1721.43	1146.43	1335.71	1176.79	1230.36	1706	2192	1738	1275	1434	1651.01	1321.92
10	12.657	184.073	184.07298_12.657	w/o MS2:Phosphocholine	[M+H]+	found in higher mz's MsMs_1204; found in higher mz's MsMs_1022	0.067	False	0.631	184.073	C5H14NO4P	Others	YHHSONZFOIEMCP-UHFFFAOYSA-N	C[N+](C)(C)CCOP(O)([O-])=O	530	True	True	False		False	False	null	null	99.9	99.3	null	null	null	133.31	Lipidomics_pos_CON_05	184.07298:3039 185.07633:512 186.07969:0		921.277	2214.89	670.213	1761.7	1693.62	905.357	944.643	1053.57	1483.93	821.429	1479	1354	1733	660	3039	1452.37	1041.72
11	18.884	186.221	186.22076_18.884	Unknown	[M+H]+		0.067	False	null	null	null	null	null	null	999	False	False	False		False	False	null	null	null	null	null	null	null	3.54	Lipidomics_pos_CON_01	186.22076:21828 187.22411:3053 188.22747:114		42227.7	39657.4	43602.1	41387.2	40161.7	38278.6	37457.1	38175	37175	37114.3	21828	19891	19524	20094	20523	41406.9	37639.8
12	12.42	186.221	186.22079_12.42	Unknown	[M+H]+		0.467	False	null	null	null	null	null	null	999	False	False	False		False	False	null	null	null	null	null	null	null	12.52	Lipidomics_pos_BL_02	186.22079:54785 187.22414:7324 188.2275:467		103189	100743	100621	97514.9	106321	100330	97830.4	96617.9	98821.4	92312.5	38479	39561	38050	39264	39227	101678	97182.8
13	12.882	186.221	186.22089_12.882	Unknown	[M+H]+		0.333	True	null	null	null	null	null	null	999	False	False	False		False	False	null	null	null	null	null	null	null	8.89	Lipidomics_pos_AH_01	186.22121:40784 187.22456:7801 188.22792:396	128.14648:139	86774.5	80502.1	87489.4	78287.2	82544.7	75123.2	76400	75485.7	77050	68114.3	28592	24938	24592	26563	27908	83119.5	74434.8
14	13.769	186.221	186.22096_13.769	Unknown	[M+H]+		0.4	False	null	null	null	null	null	null	999	False	False	False		False	False	null	null	null	null	null	null	null	6.38	Lipidomics_pos_AH_01	186.22096:51289 187.22431:5546 188.22767:446		109126	104426	109404	102119	106666	92367.9	92901.8	90592.9	92848.2	94451.8	39654	38693	38651	37012	37405	106348	92632
15	11.406	186.221	186.22098_11.406	Unknown	[M+H]+		0.333	False	null	null	null	null	null	null	999	False	False	False		False	False	null	null	null	null	null	null	null	14.5	Lipidomics_pos_AH_01	186.22098:64833 187.22433:8586 188.22769:546		137943	139194	139538	137519	138645	122145	116359	120221	119937	113836	59825	57318	57632	56951	56984	138567	118500
16	13.305	186.221	186.22102_13.305	Unknown	[M+H]+		0.133	False	null	null	null	null	null	null	999	False	False	False		False	False	null	null	null	null	null	null	null	5.05	Lipidomics_pos_CON_02	186.22102:36021 187.22437:5086 188.22773:388		94121.3	94344.7	94551.1	93014.9	92955.3	93953.6	86371.4	92341.1	84126.8	87039.3	35007	36021	34093	35358	34014	93797.7	88766.6
17	2.216	186.221	186.22119_2.216	Unknown	[M+H]+		0.2	False	null	null	null	null	null	null	999	False	False	False		False	False	null	null	null	null	null	null	null	9.91	Lipidomics_pos_AH_05	186.22119:92089 187.22454:13529 188.2279:812		194096	185274	188347	184926	195934	163546	161962	158102	160268	163437	95876	92491	90100	89707	89713	189715	161463
18	2.403	186.221	186.22122_2.403	Unknown	[M+H]+		0.067	False	null	null	null	null	null	null	999	False	False	False		False	False	null	null	null	null	null	null	null	11.69	Lipidomics_pos_AH_01	186.22122:91225 187.22457:13949 188.22793:694		194096	185274	200696	190166	187296	171046	162077	157627	158586	158337	95876	88937	93522	89778	88447	191506	161535
19	4.054	186.221	186.22128_4.054	Unknown	[M+H]+		0.267	False	null	null	null	null	null	null	999	False	False	False		False	False	null	null	null	null	null	null	null	10.85	Lipidomics_pos_BL_05	186.22128:93190 187.22463:13708 188.22799:715		192006	197274	200632	196521	179572	157187	164564	161348	165477	166411	95741	91622	92761	93055	89260	193201	162997
20	1.712	186.221	186.22128_1.712	Unknown	[M+H]+		0.333	False	null	null	null	null	null	null	999	False	False	False		False	False	null	null	null	null	null	null	null	9.24	Lipidomics_pos_BL_02	186.22128:94223 187.22463:13597 188.22799:879		188326	195994	196517	188468	191798	158266	168255	162021	158782	163946	94971	92195	91129	91946	90203	192221	162254
21	1.905	186.221	186.22128_1.905	Unknown	[M+H]+		0.067	False	null	null	null	null	null	null	999	False	False	False		False	False	null	null	null	null	null	null	null	11.04	Lipidomics_pos_AH_01	186.22128:89733 187.22463:14550 188.22799:648		190921	184545	196517	185387	191798	166912	162530	162321	158782	162446	93153	90672	87632	89834	90814	189834	162599
22	14.14	186.221	186.22128_14.14	Unknown	[M+H]+		0.2	False	null	null	null	null	null	null	999	False	False	False		False	False	null	null	null	null	null	null	null	6.02	Lipidomics_pos_CON_05	186.22128:49973 187.22463:6019 188.22799:302		116666	110777	116723	116391	116581	99189.3	96471.4	98082.1	97675	94073.2	48267	47904	48039	47630	49973	115428	97097.7
23	4.575	186.221	186.22131_4.575	Unknown	[M+H]+		0.267	False	null	null	null	null	null	null	999	False	False	False		False	False	null	null	null	null	null	null	null	5.58	Lipidomics_pos_BL_02	186.22131:91936 187.22466:14076 188.22802:653		194168	190226	189232	190540	186983	158759	164171	158457	161814	157407	94522	92633	89011	88677	91528	190230	160122
24	1.539	186.221	186.22134_1.539	Unknown	[M+H]+		0.333	True	null	null	null	null	null	null	999	False	False	False		False	False	null	null	null	null	null	null	null	22.99	Lipidomics_pos_BL_04	186.22141:87450 187.22476:12677 188.22812:702	128.14323:112 130.15889:1803	186879	195994	193502	187585	190100	168125	155037	162021	156161	158302	92359	92195	88485	90666	88249	190812	159929
25	1.821	187.224	187.22444_1.821	Unknown	[M+H]+		0.067	False	null	null	null	null	null	null	999	False	False	False		False	False	null	null	null	null	null	null	null	8.81	Lipidomics_pos_AH_05	187.22444:13443 188.22779:853 189.23115:72		28255.3	28476.6	26172.3	28044.7	28602.1	25225	23669.6	24026.8	22019.6	23696.4	13551	13357	12933	13418	13131	27910	23727.7
26	12.35	187.225	187.22456_12.35	Unknown	[M+H]+		0.267	False	null	null	null	null	null	null	999	False	False	False		False	False	null	null	null	null	null	null	null	8.64	Lipidomics_pos_BL_03	187.22456:7051 188.22791:521 189.23127:0		12251.1	13651.1	13872.3	13087.2	12695.7	11730.4	12660.7	12591.1	11901.8	11360.7	4981	4832	4404	4435	4562	13111.5	12048.6
27	5.66	193.158	193.15836_5.66	Unknown	[M+H-H2O]+	ion correlated with 32; ion correlated with 47; ion correlated with 35; similar chromatogram in higher mz_719; adduct linked to 39_[M+NH4]+; similar chromatogram in higher mz_134; adduct linked to 32_[M+H]+	0.133	True	null	null	null	null	null	null	999	False	False	False		False	False	null	null	null	null	null	null	null	29.33	Lipidomics_pos_AH_01	193.15836:1176 194.16171:254 195.16507:129	81.0682:69 149.1329:49 175.14893:118	2502.13	2080.85	623.404	880.851	878.723	400	750	1353.57	917.857	553.571	539	1071	414	410	292	1392.58	794.732
28	1.442	202.216	202.21616_1.442	Unknown	[M+H]+		0.133	True	null	null	null	null	null	null	999	False	False	False		False	False	null	null	null	null	null	null	null	54.41	Lipidomics_pos_AH_03	202.21584:6366 203.21919:975 204.22255:74	85.06434:124 90.09064:57 129.06943:38 146.15308:158 184.20399:265	4804.26	4502.13	13544.7	4208.51	4100	4989.29	20839.3	3833.93	3403.57	3783.93	2202	2148	2473	2081	3024	6231.94	7369.98
29	2.467	205.085	205.08534_2.467	Unknown	[M+H]+		0.467	True	null	null	null	null	null	null	999	False	False	False		False	False	null	null	null	null	null	null	null	16.02	Lipidomics_pos_BL_03	205.08546:1352 206.08881:261 207.09217:0	93.03239:58 149.01019:25	2480.85	2436.17	2200	2180.85	2702.13	1657.14	1587.5	2414.29	2667.86	1675	1407	1410	1672	1287	1321	2400.24	2000.67
30	1.414	207.158	207.15846_1.414	Unknown	[M+H]+	similar chromatogram in higher mz_46	0.933	True	null	null	null	null	null	null	999	False	False	False		False	False	null	null	null	null	null	null	null	22.51	Lipidomics_pos_AH_01	207.15855:1161 208.1619:306 209.16526:244	73.06398:76 89.05978:1569 107.08447:25 149.09554:67 207.13573:60	2470.21	2455.32	2502.13	2455.32	2691.49	2121.43	2358.93	2191.07	2435.71	2178.57	1411	1311	1231	1250	1236	2515.29	2257.21
31	1.939	209.096	209.09563_1.939	Unknown	[M+H]+	similar chromatogram in higher mz_291	1	True	null	null	null	null	null	null	999	False	False	False		False	False	null	null	null	null	null	null	null	30.62	Lipidomics_pos_AH_01	209.09557:2301 210.09892:625 211.10228:93	77.03886:590 103.05439:1232 115.05418:93 191.08606:182 194.07236:149	4895.74	5370.21	4608.51	4474.47	4044.68	3808.93	4208.93	4021.43	3800	3557.14	2140	2222	2495	1937	2238	4678.83	3879.51
32	5.648	211.169	211.16895_5.648	Unknown	[M+H]+	ion correlated with 27; adduct linked to 27_[M+H-H2O]+	0.067	True	null	null	null	null	null	null	999	False	False	False		False	False	null	null	null	null	null	null	null	22.63	Lipidomics_pos_AH_01	211.16895:1233 212.1723:265 213.17566:71	83.08527:140 93.06971:170 105.06983:99 109.10094:135 133.10176:130 151.14973:104 175.1479:293	2623.4	2074.47	644.681	800	1000	469.643	775	1433.93	844.643	492.857	621	872	411	386	369	1428.91	802.924
33	1.803	221.096	221.0957_1.803	Unknown	[M+H]+		0.733	True	null	null	null	null	null	null	999	False	False	False		False	False	null	null	null	null	null	null	null	58.64	Lipidomics_pos_AH_01	221.09567:1278 222.09902:588 223.10238:56	77.03824:388 91.05422:491 105.03394:607 165.06805:68 193.10106:645	2719.15	3114.89	2776.6	2395.74	1942.55	1862.5	2219.64	2157.14	2017.86	1746.43	1021	1216	1060	1034	1307	2589.92	2000.6
34	6.041	221.174	221.17435_6.041	Unknown	[M+H]+		0.133	True	null	null	null	null	null	null	999	False	False	False		False	False	null	null	null	null	null	null	null	24.02	Lipidomics_pos_AH_01	221.17435:1090 222.1777:446 223.18106:49	89.06014:7 95.04888:20 109.10082:9 161.07449:30 165.11327:7 203.08154:38	2319.15	2142.55	768.085	891.489	859.574	535.714	942.857	1383.93	1167.86	633.929	573	1083	585	474	331	1396.09	933.08
35	5.649	221.174	221.17444_5.649	Unknown	[M+H]+	ion correlated with 47; ion correlated with 27	0.133	True	null	null	null	null	null	null	999	False	False	False		False	False	null	null	null	null	null	null	null	24.49	Lipidomics_pos_AH_01	221.17438:1018 222.17773:372 223.18109:0	88.98104:25 221.16461:26 221.17554:26	2165.96	1819.15	629.787	791.489	851.064	457.143	801.786	1191.07	1060.71	600	678	1114	505	475	384	1252.05	822.366
36	5.657	226.18	226.17986_5.657	Unknown	[M+H-H2O]+	found in higher mz's MsMs_158; adduct linked to 45_[M+H]+	0.133	False	null	null	null	null	null	null	999	False	False	False		False	False	null	null	null	null	null	null	null	32.57	Lipidomics_pos_AH_01	226.17986:1371 227.18321:1354 228.18657:8257		2917.02	2514.89	889.362	1053.19	938.298	507.143	928.571	1433.93	1244.64	633.929	681	1094	512	438	322	1662.66	949.732
37	6.038	228.195	228.19521_6.038	Unknown	[M+H]+	similar chromatogram in higher mz_155	0.933	True	null	null	null	null	null	null	999	False	False	False		False	False	null	null	null	null	null	null	null	55.61	Lipidomics_pos_AH_01	228.19521:5500 229.19856:776 230.20192:117	79.0541:51 95.08527:244 107.08472:29 147.11545:37	11702.1	8714.89	3229.79	4121.28	4142.55	1728.57	3280.36	6119.64	4730.36	2658.93	2509	4081	2113	1644	1267	6382.26	3703.84
38	1.491	228.195	228.19543_1.491	Unknown	[M+H]+		0.4	True	null	null	null	null	null	null	999	False	False	False		False	False	null	null	null	null	null	null	null	27.26	Lipidomics_pos_AH_01	228.19527:1333 229.19862:510 230.20198:45	65.04061:83 77.03825:33 81.06984:1014 91.05375:199 98.98399:194 105.06909:143 119.08492:170 127.07445:17 141.09167:42 175.13319:33 228.17873:199	2836.17	2627.66	1340.43	1578.72	1504.26	964.286	1512.5	2839.29	1891.07	1380.36	918	1227	1003	778	503	1977.74	1717.72
39	5.657	228.196	228.19557_5.657	Unknown	[M+NH4]+	found in higher mz's MsMs_158; adduct linked to 27_[M+H-H2O]+	0.933	True	null	null	null	null	null	null	999	False	False	False		False	False	null	null	null	null	null	null	null	66.84	Lipidomics_pos_AH_01	228.19557:6047 229.19892:1056 230.20228:152	79.05353:64 93.06907:75 105.06836:29 109.10216:180 149.13306:44	12866	10666	3880.85	4714.89	3942.55	1969.64	4094.64	7614.29	5107.14	2817.86	2786	4942	2329	2011	1731	7214.39	4320.69
40	1.653	230.247	230.24718_1.653	Unknown	[M+H]+	found in higher mz's MsMs_560	0.267	True	null	null	null	null	null	null	999	False	False	False		False	False	null	null	null	null	null	null	null	138.17	Lipidomics_pos_AH_03	230.24712:3609 231.25047:741 232.25383:0	212.23753:178	927.66	561.702	7678.72	527.66	789.362	4030.36	17173.2	828.571	330.357	300	310	362	530	235	1583	2096.94	4532.46
41	6.036	237.148	237.14821_6.036	Unknown	[M+H]+	found in higher mz's MsMs_145	0.8	True	null	null	null	null	null	null	999	False	False	False		False	False	null	null	null	null	null	null	null	27.56	Lipidomics_pos_AH_01	237.14821:3163 238.15156:418 239.15492:480	91.05394:44 111.07977:77 219.15263:22 237.22055:173	6729.79	5908.51	2504.26	3063.83	3000	1585.71	2551.79	4355.36	3378.57	2082.14	1663	2692	1581	1418	1065	4240.8	2790.85
42	5.648	237.148	237.14832_5.648	Unknown	[M+H]+	found in higher mz's MsMs_146	0.4	True	null	null	null	null	null	null	999	False	False	False		False	False	null	null	null	null	null	null	null	25.78	Lipidomics_pos_AH_01	237.14832:2331 238.15167:354 239.15503:510	83.04651:36 237.20638:58	4959.57	4093.62	2017.02	2300	2229.79	1062.5	1867.86	2912.5	2407.14	1408.93	1113	1870	1048	877	852	3120	1931.58
43	1.715	240.231	240.23132_1.715	Unknown	[M+H]+	ion correlated with 108; similar chromatogram in higher mz_108	0.067	True	null	null	null	null	null	null	999	False	False	False		False	False	null	null	null	null	null	null	null	40.26	Lipidomics_pos_BL_03	240.23132:1671 241.23467:256 242.23803:0	183.17462:160	1029.79	1119.15	1163.83	1097.87	793.617	425	919.643	2983.93	405.357	632.143	387	450	926	508	236	1040.93	1073.04
44	6.038	244.19	244.1899_6.038	w/o MS2:NAGly 11:0	[M+H]+		0.667	True	3.6	244.191	C13H25NO3	NAGly	HEUQYIQQCNOXOG-UHFFFAOYSA-N	O=C(O)CNC(=O)CCCCCCCCCC	530	True	True	False		False	False	null	null	99.7	100	null	null	null	66.85	Lipidomics_pos_AH_01	244.1899:3077 245.19325:562 246.19661:45	72.07839:85 81.06909:896 91.05418:192 105.06957:55 121.10025:440 131.08472:63 156.17477:88 163.14684:997 227.16371:1117	6546.81	5685.11	1976.6	2804.26	2417.02	991.071	1989.29	3135.71	2566.07	1562.5	1363	2231	1104	930	750	3886.2	2048.88
45	5.655	244.19	244.19019_5.655	w/o MS2:NAGly 11:0	[M+H]+	adduct linked to 36_[M+H-H2O]+	0.733	True	3.6	244.191	C13H25NO3	NAGly	HEUQYIQQCNOXOG-UHFFFAOYSA-N	O=C(O)CNC(=O)CCCCCCCCCC	530	True	True	False		False	False	null	null	99.9	100	null	null	null	73.57	Lipidomics_pos_AH_01	244.19019:3558 245.19354:593 246.1969:51	67.05311:34 72.04247:43 79.05625:25 83.08406:40 107.08274:25 180.17154:42 181.15746:29 208.17511:26	7570.21	5834.04	2002.13	3008.51	2989.36	1041.07	2260.71	3501.79	2823.21	2007.14	1313	2290	1129	1001	782	4280.61	2326.76
46	1.412	246.243	246.24271_1.412	w/o MS2:SPB 14:0;2O	[M+H]+		0.533	True	4.72	246.243	C14H31NO2	DHSph	JDTJDLPFECSKQJ-UHFFFAOYSA-N	OCC(N)C(O)CCCCCCCCCCC	530	True	True	False		False	False	null	null	100	99.9	null	null	null	439.36	Lipidomics_pos_BL_01	246.24271:41214 247.24606:8537 248.24942:797	81.06141:19 85.10154:62 102.09053:324 193.12279:41 228.23213:1190 246.24377:14822	1563.83	706.383	13138.3	755.319	3529.79	73596.4	11612.5	2303.57	589.286	848.214	970	362	1483	2070	30656	3939.02	17790.2
47	5.648	250.177	250.17705_5.648	Unknown	[M+H]+	ion correlated with 35; ion correlated with 27	0.067	True	null	null	null	null	null	null	999	False	False	False		False	False	null	null	null	null	null	null	null	46.17	Lipidomics_pos_AH_01	250.17705:1106 251.1804:575 252.18376:111	132.90462:79 171.13847:40 232.07423:67 250.06487:26 250.14452:41 250.15903:26 250.17854:153	2353.19	1719.15	772.34	917.021	997.872	467.857	900	1262.5	1092.86	542.857	682	1063	573	434	368	1352.13	853.393
48	5.114	256.263	256.26288_5.114	Unknown	[M+H]+		0.2	True	null	null	null	null	null	null	999	False	False	False		False	False	null	null	null	null	null	null	null	40.44	Lipidomics_pos_AH_01	256.26245:1238 257.2658:220 258.26916:40	71.05048:23 85.1003:18 102.09185:98 130.12164:20 214.21252:6 239.15041:92 256.26315:2159	2634.04	1402.13	2006.38	902.128	1648.94	800	1523.21	1510.71	1153.57	1805.36	1490	1979	726	868	965	1719.07	1359.08
49	2.797	258.243	258.24258_2.797	NAE 13:0	[M+H]+		0.133	True	5.78	258.243	C15H31NO2	NAE	QIGYRHZXILJBGB-UHFFFAOYSA-N	O=C(NCCO)CCCCCCCCCCCC	410	True	True	True		False	False	null	null	100	100	20	75	100	45.29	Lipidomics_pos_AH_03	258.24231:1131 259.24566:214 260.24902:61	212.21898:13 230.2475:1951 240.23186:584 258.24249:828	497.872	374.468	2406.38	157.447	42.5532	133.929	2451.79	73.2143	69.6429	58.9286	117	27	141	16	85	695.984	557.433
50	7.787	261.148	261.14822_7.787	Unknown	[M+H]+		1	True	null	null	null	null	null	null	999	False	False	False		False	False	null	null	null	null	null	null	null	205.44	Lipidomics_pos_AH_01	261.14807:10548 262.15142:2287 263.15478:278	149.02419:17 261.12985:33	22442.6	25631.9	23104.3	27114.9	25031.9	18396.4	17237.5	18028.6	16287.5	17551.8	12357	11802	11867	11766	13149	24665.2	17500.2
51	1.468	262.237	262.2373_1.468	w/o MS2:SPB 14:0;3O	[M+H]+		0.533	True	3.9	262.238	C14H31NO3	PhytoSph	QDBLJDVWLXPWOQ-UHFFFAOYSA-N	OCC(N)C(O)C(O)CCCCCCCCCC	530	True	True	False		False	False	null	null	99.9	100	null	null	null	125.78	Lipidomics_pos_BL_02	262.2373:11671 263.24065:2517 264.24401:359	71.08538:18 88.07561:407 200.19968:14 262.23761:1425	3617.02	2240.43	22046.8	297.872	570.213	7260.71	20841.1	1283.93	528.571	758.929	1326	451	1244	247	3394	5754.49	6134.42
52	1.596	274.274	274.27362_1.596	w/o MS2:SPB 16:0;2O	[M+H]+	similar chromatogram in higher mz_2158	0.733	True	6.01	274.274	C16H35NO2	DHSph	ZKLREJQHRKUJHD-UHFFFAOYSA-N	OCC(N)C(O)CCCCCCCCCCCCC	530	True	True	False		False	False	null	null	99.9	99.9	null	null	null	144.28	Lipidomics_pos_BL_01	274.27362:56366 275.27697:17292 276.28033:1714	88.07525:1249 102.09159:301 212.23872:43 256.26328:1240 274.27393:14258	3057.45	1997.87	8685.11	2348.94	7300	100654	9482.14	2712.5	1237.5	1175	1377	746	1832	2413	26901	4677.5	23052.1
53	7.788	279.159	279.15869_7.788	Unknown	[M+H]+	found in higher mz's MsMs_1307	1	True	null	null	null	null	null	null	999	False	False	False		False	False	null	null	null	null	null	null	null	323.3	Lipidomics_pos_AH_01	279.15866:30156 280.16201:5323 281.16537:673	93.03141:17	64161.7	73397.9	62080.9	72268.1	68263.8	47546.4	49225	50908.9	46371.4	48814.3	34191	32517	32398	33323	34575	68034.5	48573
54	2.457	279.159	279.15918_2.457	Unknown	[M+H]+	similar chromatogram in higher mz_285	0.067	True	null	null	null	null	null	null	999	False	False	False		False	False	null	null	null	null	null	null	null	11.53	Lipidomics_pos_BL_04	279.15918:1256 280.16253:372 281.16589:97	87.04325:42 93.03333:352 149.02428:36458 167.03101:46	1987.23	1987.23	2078.72	1838.3	2259.57	1400	1539.29	1678.57	2242.86	1594.64	1046	1180	1089	1068	1053	2030.43	1690.58
55	1.663	281.138	281.13815_1.663	Unknown	[M+H]+	similar chromatogram in higher mz_178; found in higher mz's MsMs_1619; similar chromatogram in higher mz_162; similar chromatogram in higher mz_83	1	True	null	null	null	null	null	null	999	False	False	False		False	False	null	null	null	null	null	null	null	55.95	Lipidomics_pos_AH_01	281.13788:2414 282.14123:719 283.14459:0	91.05846:210 107.08545:724 135.08128:1041	5136.17	5359.57	5061.7	5044.68	5176.6	4919.64	4485.71	4442.86	4037.5	4108.93	4891	3328	2476	2287	2201	5155.74	4398.95
56	5.385	282.279	282.27859_5.385	Unknown	[M+H]+		0.467	True	null	null	null	null	null	null	999	False	False	False		False	False	null	null	null	null	null	null	null	94.55	Lipidomics_pos_AH_01	282.27869:2242 283.28204:510 284.2854:95	69.06968:488 71.08595:168 72.07947:67 86.05964:92 91.05469:43 95.08591:204 106.07115:15 111.11721:114 129.12636:22 163.14851:93 181.16162:27 191.17854:77 205.194:26 226.21565:24 240.26897:32 265.2511:383 282.27844:1221	4770.21	2672.34	2600	1919.15	2536.17	1753.57	3858.93	2544.64	3142.86	7351.79	4308	5676	1370	1138	2286	2899.73	3730.8
57	5.676	282.279	282.27899_5.676	Unknown	[M+H]+		0.867	True	null	null	null	null	null	null	999	False	False	False		False	False	null	null	null	null	null	null	null	92.71	Lipidomics_pos_AH_01	282.27853:3810 283.28188:1034 284.28524:197	73.0659:17 83.08558:475 93.06976:86 95.08559:203 101.09398:48 107.0849:136 111.11622:177 121.0923:35 128.10632:78 149.13217:190 153.1244:149 181.19312:46 240.27002:31 282.26532:204	8106.38	3827.66	4061.7	2214.89	4104.26	2194.64	7214.29	4160.71	3710.71	7430.36	6574	8711	1740	2062	4219	4462.66	4942.14
58	6.988	284.294	284.29437_6.988	w/o MS2:RIKEN P-VS1 ID-1009 from Mouse_Muscle_WT_CTX0_Ctr	[M+H]+		0.2	True	7.1	284.298		Unknown			530	True	True	False		False	False	null	null	94.3	100	null	null	null	21.18	Lipidomics_pos_CON_02	284.29437:2086 285.29772:304 286.30108:54	69.06973:63 83.08524:25 88.07595:274 102.09115:125 111.11744:23 200.19768:6 284.29587:4509	2648.94	1570.21	1740.43	1036.17	1476.6	773.214	1550	1326.79	1089.29	1500	1290	2086	757	826	1055	1694.31	1247.61
59	2.709	284.33	284.33017_2.709	Unknown	[M+H]+		0.267	True	null	null	null	null	null	null	999	False	False	False		False	False	null	null	null	null	null	null	null	29.85	Lipidomics_pos_BL_03	284.33069:1303 285.33404:259 286.3374:0	118.07637:18 133.07939:20 222.96878:19 284.33115:4198	1414.89	1453.19	2014.89	1846.81	1493.62	1351.79	1692.86	2326.79	1401.79	1673.21	3436	1942	2149	929	886	1644.92	1689.37
60	1.72	288.289	288.28937_1.72	w/o MS2:SPB 17:0;2O	[M+H]+		1	True	6.12	288.29	C17H37NO2	DHSph	KFQUQCFJDMSIJF-UHFFFAOYSA-N	OCC(N)C(O)CCCCCCCCCCCCCC	530	True	True	False		False	False	null	null	99.9	99.9	null	null	null	23.78	Lipidomics_pos_CON_04	288.28937:2141 289.29272:363 290.29608:101	70.06205:204 270.27448:115	3063.83	3940.43	3334.04	4012.77	3717.02	2323.21	2601.79	2475	2319.64	2469.64	2113	1985	1881	2141	1810	3614.04	2437.68
61	1.718	290.268	290.26834_1.718	w/o MS2:SPB 16:0;3O	[M+H]+		0.4	True	5.33	290.269	C16H35NO3	PhytoSph	OCHZTELGZBWSJD-UHFFFAOYSA-N	OCC(N)C(O)C(O)CCCCCCCCCCCC	530	True	True	False		False	False	null	null	99.8	99.9	null	null	null	99.94	Lipidomics_pos_BL_02	290.26834:10463 291.27169:2340 292.27505:280	74.06003:58 210.22108:36	5642.55	1617.02	19317	500	1359.57	9132.14	18683.9	1014.29	717.857	448.214	1107	304	923	329	2188	5687.42	5999.11
62	1.663	295.117	295.11685_1.663	Unknown	[M+H]+	ion correlated with 1732	1	True	null	null	null	null	null	null	999	False	False	False		False	False	null	null	null	null	null	null	null	38.58	Lipidomics_pos_AH_01	295.11758:1270 296.12093:437 297.12429:0	133.06416:290	2702.13	3214.89	2712.77	3214.89	2919.15	2908.93	2667.86	2741.07	2416.07	2491.07	3522	1948	1616	1361	1221	2952.53	2644.84
63	1.698	301.285	301.28455_1.698	Unknown	[M+H]+		0.067	True	null	null	null	null	null	null	999	False	False	False		False	False	null	null	null	null	null	null	null	22.91	Lipidomics_pos_CON_03	301.28455:1594 302.2879:395 303.29126:0	109.1009:203	421.277	485.106	476.596	455.319	431.915	266.071	473.214	414.286	194.643	339.286	216	492	1594	231	111	453.856	337.746
64	1.978	302.304	302.30417_1.978	w/o MS2:C18-Sphinganine	[M+H]+		0.067	True	6.88	302.305	C18H39NO2	Others	OTKJDMGTUTTYMP-ZWKOTPCHSA-N	CCCCCCCCCCCCCCC[C@@H](O)[C@@H](N)CO	530	True	True	False		False	False	null	null	99.3	99.9	null	null	null	34.76	Lipidomics_pos_BL_01	302.30417:1402 303.30752:396 304.31088:102	284.29379:255 284.97052:52	238.298	125.532	429.787	80.8511	238.298	2503.57	333.929	126.786	83.9286	91.0714	51	41	75	55	474	222.234	628.326
65	1.78	304.299	304.29883_1.78	Unknown	[M+H]+		0.533	True	null	null	null	null	null	null	999	False	False	False		False	False	null	null	null	null	null	null	null	46.67	Lipidomics_pos_AH_02	304.29959:1171 305.30294:408 306.3063:0	81.06768:63 199.17429:106 304.28253:94	1953.19	2491.49	1997.87	3680.85	4038.3	1182.14	1941.07	1523.21	1110.71	1505.36	1131	1890	2131	941	1043	2832.31	1452.23
66	7.117	310.31	310.31018_7.117	Unknown	[M+H]+		0.6	True	null	null	null	null	null	null	999	False	False	False		False	False	null	null	null	null	null	null	null	33.28	Lipidomics_pos_AH_01	310.31003:2986 311.31338:549 312.31674:54	69.06978:476 77.03739:29 83.08557:521 86.06012:101 93.06937:143 97.10116:450 100.07467:130 107.08626:114 121.10072:188 128.10585:69 145.10132:10 163.14769:84 169.15799:37 198.18523:67 212.19955:72 275.27365:456 293.28339:533 310.2836:40	6353.19	3227.66	3048.94	3517.02	1429.79	2067.86	3975	4989.29	7158.93	2571.43	1122	2384	1244	444	702	3515.24	4152.3
67	14.673	313.272	313.27243_14.673	Unknown	[M+H]+	similar chromatogram in higher mz_375; found in higher mz's MsMs_398	0.667	True	null	null	null	null	null	null	999	False	False	False		False	False	null	null	null	null	null	null	null	31.39	Lipidomics_pos_BL_01	313.27301:1313 314.27636:273 315.27972:49	83.08495:50 97.10189:41 239.23636:41 313.27435:716	1808.51	1855.32	1761.7	2361.7	1921.28	2344.64	2750	2600	2250	3128.57	3194	2792	2895	3206	2507	1941.41	2614.69
68	15.433	313.273	313.2731_15.433	Unknown	[M+H]+	ion correlated with 84; ion correlated with 312; ion correlated with 370; ion correlated with 413; ion correlated with 623; similar chromatogram in higher mz_84	0.333	True	null	null	null	null	null	null	999	False	False	False		False	False	null	null	null	null	null	null	null	18.28	Lipidomics_pos_CON_01	313.2731:1709 314.27645:492 315.27981:33	69.06973:89 81.06943:77 83.0872:127 109.10068:39 233.1487:72 313.27213:1834	561.702	491.489	551.064	582.979	500	878.571	914.286	835.714	839.286	1169.64	1709	1420	1432	1416	1346	537.207	927.076
69	1.703	313.321	313.32104_1.703	Unknown	[M+H]+		0.067	True	null	null	null	null	null	null	999	False	False	False		False	False	null	null	null	null	null	null	null	17.28	Lipidomics_pos_CON_05	313.32104:1014 314.32439:330 315.32775:0	91.05315:76 142.15741:206 313.3075:139	993.617	1125.53	1076.6	1227.66	1108.51	873.214	869.643	932.143	798.214	1057.14	965	818	906	773	1014	1106.46	905.893
70	2.947	315.174	315.17407_2.947	RIKEN P-VS1 ID-1354 from Mouse_Macrophage_WT_N_F1AA	[M+H]+		1	True	5.63	315.176		Unknown			430	True	True	True		False	False	null	null	87.8	100	90	81.1	66.7	279.62	Lipidomics_pos_AH_03	315.17401:10160 316.17736:2849 317.18072:400	91.05372:948 117.06955:4140	24736.2	29666	21617	23559.6	22334	20958.9	22582.1	19042.9	17385.7	18041.1	10617	11077	11969	10979	12889	24383	19602.2
71	4.029	319.284	319.28403_4.029	Unknown	[M+H]+		0.467	True	null	null	null	null	null	null	999	False	False	False		False	False	null	null	null	null	null	null	null	32.54	Lipidomics_pos_AH_01	319.28296:1049 320.28631:217 321.28967:50	71.08516:77 73.06378:23 151.09392:63 186.21812:14 301.17905:7 319.18015:34	2231.91	2312.77	2070.21	2174.47	1455.32	1632.14	2725	1941.07	1421.43	1512.5	1267	2040	1490	1076	892	2049.02	1846.7
72	8.848	321.315	321.3147_8.848	Unknown	[M+H]+	adduct linked to 77_[M+NH4]+; similar chromatogram in higher mz_645; similar chromatogram in higher mz_89; found in higher mz's MsMs_645; found in higher mz's MsMs_77; similar chromatogram in higher mz_112	0.333	True	null	null	null	null	null	null	999	False	False	False		False	False	null	null	null	null	null	null	null	43.59	Lipidomics_pos_AH_01	321.31424:1977 322.31759:531 323.32095:73	81.06907:103 93.07151:52 109.10032:52 239.23528:45 303.30237:169	4206.38	2410.64	2176.6	1991.49	1221.28	1462.5	2905.36	2882.14	3735.71	1494.64	795	1351	975	444	498	2402.02	2496.27
73	1.944	329.153	329.15305_1.944	Unknown	[M+H]+	similar chromatogram in higher mz_92	1	True	null	null	null	null	null	null	999	False	False	False		False	False	null	null	null	null	null	null	null	47.14	Lipidomics_pos_AH_01	329.15305:2395 330.1564:774 331.15976:122	105.03359:175 194.07025:25	5095.74	4748.94	4642.55	4312.77	3778.72	3466.07	4058.93	3296.43	3767.86	3691.07	2032	1919	2167	1932	2147	4515.43	3655.76
74	8.331	331.32	331.31973_8.331	Unknown	[M+H]+	adduct linked to 87_[M+NH4]+	1	True	null	null	null	null	null	null	999	False	False	False		False	False	null	null	null	null	null	null	null	46.49	Lipidomics_pos_AH_01	331.31982:2482 332.32317:517 333.32653:65	85.10141:95 125.13182:10 228.16077:25 296.22528:22 331.20926:386	5280.85	5251.06	4989.36	5397.87	4827.66	4078.57	5225	4437.5	3932.14	4167.86	2904	3056	2518	2501	2145	5149.55	4368.15
75	2.29	332.331	332.33084_2.29	Unknown	[M+H]+	similar chromatogram in higher mz_124	0.333	True	null	null	null	null	null	null	999	False	False	False		False	False	null	null	null	null	null	null	null	70.31	Lipidomics_pos_AH_02	332.33026:1032 333.33361:298 334.33697:68	240.26802:599	1695.74	2195.74	1482.98	4891.49	5482.98	1169.64	1487.5	1382.14	1153.57	1448.21	916	2844	1158	873	837	3149.92	1328.28
76	7.417	336.326	336.32578_7.417	Unknown	[M+H]+		0.067	True	null	null	null	null	null	null	999	False	False	False		False	False	null	null	null	null	null	null	null	34.02	Lipidomics_pos_AH_01	336.32578:1214 337.32913:312 338.33249:3936	67.05394:142 71.08563:58 77.03783:4 81.06992:224 86.05979:37 89.05967:35 93.06995:34 97.1012:106 100.07547:50 105.06922:31 107.08466:40 111.11643:41 115.10849:2 121.10039:71 133.10101:47 140.10655:5 149.13239:41 168.13599:3 171.175:3 184.16893:30 203.17877:16 212.20084:30 219.21046:32 223.20572:13 231.21262:11 239.14722:3 245.22665:13 261.25919:3 301.28879:179 319.29901:693 336.32556:468	2582.98	919.149	1285.11	1023.4	804.255	816.071	1194.64	1451.79	1617.86	882.143	569	842	459	240	325	1323.3	1192.72
77	8.852	338.341	338.341_8.852	w/o MS2:13-Docosenamide	[M+NH4]+	adduct linked to 72_[M+H]+; found in higher mz's MsMs_645	1	True	8.059	338.342	C22H43NO	Others	UAUDZVJPLUQNMU-KTKRTIGZSA-N	CCCCCCCC\C=C/CCCCCCCCCCCC(N)=O	530	True	True	False		False	False	null	null	99.7	100	null	null	null	154.64	Lipidomics_pos_AH_01	338.341:73909 339.34435:22872 340.34771:2748	77.0377:19 83.08532:749 93.06014:24 97.10081:673 100.11066:21 107.08476:280 121.1006:271 125.09562:188 135.11658:332 149.13193:237 163.14731:178 170.15344:106 205.19521:42 209.19038:54 265.24976:40 296.33081:73 320.3302:56 338.34045:2839	157253	81568.1	82559.6	75997.9	45902.1	54564.3	93344.6	104893	123168	56589.3	34052	50053	32177	15260	18560	88655.9	86512
78	9.134	338.341	338.34109_9.134	w/o MS2:13-Docosenamide	[M+H]+		0.067	False	8.059	338.342	C22H43NO	Others	UAUDZVJPLUQNMU-KTKRTIGZSA-N	CCCCCCCC\C=C/CCCCCCCCCCCC(N)=O	530	True	True	False		False	False	null	null	99.8	100	null	null	null	20.58	Lipidomics_pos_AH_02	338.34109:7796 339.34444:1910 340.3478:170		13566	16587.2	9059.57	10778.7	9508.51	7355.36	13387.5	10101.8	9807.14	6469.64	4970	5063	5661	3663	3233	11899.7	9424.75
79	4.292	338.341	338.34109_4.292	w/o MS2:13-Docosenamide	[M+H]+		0.333	True	8.059	338.342	C22H43NO	Others	UAUDZVJPLUQNMU-KTKRTIGZSA-N	CCCCCCCC\C=C/CCCCCCCCCCCC(N)=O	530	True	True	False		False	False	null	null	99.8	99.9	null	null	null	23.02	Lipidomics_pos_BL_04	338.34109:6397 339.34444:1747 340.3478:174	81.06957:15 91.0542:8 95.08566:21 101.0577:29 123.11646:10 129.09219:5 163.14642:10 181.15988:8 195.09999:5 254.25375:5 282.27609:7 303.28793:5 321.31543:47	3336.17	3682.98	3614.89	3327.66	3917.02	10757.1	10228.6	10182.1	11423.2	10862.5	1660	1486	1418	1584	1796	3575.56	10690.2
80	11.308	339.289	339.28864_11.308	Unknown	[M+H]+	ion correlated with 1121	0.467	True	null	null	null	null	null	null	999	False	False	False		False	False	null	null	null	null	null	null	null	18.35	Lipidomics_pos_AH_05	339.28763:1133 340.29098:326 341.29434:98	93.06854:48 107.0834:26 115.07416:30 126.09945:26 149.13144:35 178.16782:17 322.31381:47 339.28915:1275	1834.04	2259.57	2238.3	2412.77	2410.64	482.143	639.286	391.071	607.143	605.357	3609	3369	3644	2897	3027	2231.54	545.179
81	14.691	339.289	339.28885_14.691	Unknown	[M+H]+	similar chromatogram in higher mz_535; found in higher mz's MsMs_418	0.4	True	null	null	null	null	null	null	999	False	False	False		False	False	null	null	null	null	null	null	null	12.72	Lipidomics_pos_BL_05	339.28812:1066 340.29147:241 341.29483:158	69.06979:147 109.10344:28 135.00096:41 220.21268:26 322.3204:87 339.2897:691	1076.6	1287.23	1038.3	1629.79	1380.85	1537.5	1614.29	1514.29	1512.5	1903.57	2012	1567	1977	1822	1445	1282.58	1615.74
82	10.448	340.355	340.35538_10.448	RIKEN P-VS1 ID-1666 from Mouse_Macrophage_WT_N_F1AA	[M+H]+		0.2	True	8.23	340.357		Unknown			430	True	True	True		False	False	null	null	82.5	100	65.7	74.5	100	10.85	Lipidomics_pos_AH_02	340.35538:1427 341.35873:374 342.36209:74	74.05981:49 86.05881:15 88.0755:142 102.09055:75 113.10722:91 200.19981:26 209.16464:727 322.18747:26 340.20322:47 340.35571:4337	2795.74	3036.17	989.362	1500	1129.79	673.214	2430.36	1560.71	1757.14	882.143	870	713	931	510	386	1890.4	1460.51
83	1.647	341.196	341.19586_1.647	Unknown	[M+H]+		0.067	True	null	null	null	null	null	null	999	False	False	False		False	False	null	null	null	null	null	null	null	24.55	Lipidomics_pos_BL_04	341.19586:1167 342.19921:398 343.20257:110	101.06172:64 228.17928:126 267.12268:704	514.894	278.723	244.681	431.915	336.17	283.929	278.571	973.214	2083.93	480.357	198	136	184	179	168	361.037	819.621
84	15.429	341.304	341.3042_15.429	Unknown	[M+H]+	ion correlated with 68; ion correlated with 312; ion correlated with 370; ion correlated with 677; ion correlated with 623; found in higher mz's MsMs_552	0.333	True	null	null	null	null	null	null	999	False	False	False		False	False	null	null	null	null	null	null	null	22.33	Lipidomics_pos_CON_01	341.3042:1615 342.30755:519 343.31091:193	71.08355:228 109.10303:73 209.16153:36 249.25572:43 285.27936:101 341.28513:368	527.66	682.979	610.638	772.34	553.191	994.643	1057.14	782.143	939.286	1126.79	1615	1188	1159	1427	1443	629.255	979.888
85	1.718	343.295	343.29523_1.718	w/o MS2:NAGly 17:1	[M+H]+		0.467	True	6.2	343.296	C19H35NO3	NAGly	UISFGLYCCDZMAC-UHFFFAOYSA-N	O=C(O)CNC(=O)CCCCCCCC=CCCCCCCC	530	True	True	False		False	False	null	null	100	99.9	null	null	null	38.02	Lipidomics_pos_BL_03	343.29523:4502 344.29858:1449 345.30194:208	183.17413:177	2780.85	2476.6	2263.83	2070.21	1825.53	975	2267.86	8039.29	907.143	1044.64	952	858	1651	1082	486	2283.91	2646.87
86	2.227	345.184	345.18387_2.227	Unknown	[M+H]+		1	True	null	null	null	null	null	null	999	False	False	False		False	False	null	null	null	null	null	null	null	53.73	Lipidomics_pos_AH_01	345.18436:2385 346.18771:928 347.19107:109	77.03915:142 128.06248:56 145.06483:486 181.10155:203 191.08583:95 205.10123:124 208.08884:140 221.0947:304 231.11864:93 249.12231:442 310.15927:56 345.18362:1148	5074.47	6912.77	5178.72	5829.79	4431.91	4500	4741.07	4346.43	4078.57	4450	2790	2382	2845	2590	2522	5485.53	4423.46
87	8.33	348.347	348.34702_8.33	Unknown	[M+NH4]+	adduct linked to 74_[M+H]+	0.8	True	null	null	null	null	null	null	999	False	False	False		False	False	null	null	null	null	null	null	null	43.44	Lipidomics_pos_AH_01	348.34601:1260 349.34936:407 350.35272:0	83.08617:114 89.06004:1903 101.09626:360 145.12183:269 275.215:34 331.32108:2045	2680.85	2742.55	2572.34	2691.49	2361.7	2255.36	2698.21	2276.79	2300	2164.29	1576	1634	1368	1344	1170	2610.11	2338.77
88	2.948	353.13	353.12958_2.948	Unknown	[M+H]+		1	True	null	null	null	null	null	null	999	False	False	False		False	False	null	null	null	null	null	null	null	72	Lipidomics_pos_AH_01	353.13:1860 354.13335:647 355.13671:162	353.10547:32	3957.45	4470.21	3427.66	3821.28	3519.15	3205.36	3544.64	3817.86	3266.07	2951.79	1742	1683	1986	1853	1838	3839.07	3357.25
89	8.853	360.323	360.32266_8.853	Unknown	[M+H]+		0.8	True	null	null	null	null	null	null	999	False	False	False		False	False	null	null	null	null	null	null	null	86.23	Lipidomics_pos_AH_01	360.32266:3935 361.32601:1251 362.32937:161	115.07428:20 307.18524:10 360.32315:2481	8372.34	2978.72	3557.45	3017.02	1438.3	1883.93	4108.93	4460.71	6442.86	2101.79	1461	2237	1172	324	619	3872.61	3799.42
90	3.903	363.31	363.31009_3.903	Unknown	[M+H]+	adduct linked to 107_[M+NH4]+	0.667	True	null	null	null	null	null	null	999	False	False	False		False	False	null	null	null	null	null	null	null	30.73	Lipidomics_pos_AH_01	363.30994:1121 364.31329:241 365.31665:43	85.1005:45 97.10162:17 107.06819:14 133.08604:110 177.11266:28 363.24289:134	2385.11	2695.74	2242.55	2570.21	1814.89	1557.14	2926.79	2337.5	1414.29	1419.64	1477	1893	1549	1116	945	2341.33	1931.12
91	10.391	366.373	366.37296_10.391	Unknown	[M+H]+		0.2	True	null	null	null	null	null	null	999	False	False	False		False	False	null	null	null	null	null	null	null	33.35	Lipidomics_pos_AH_01	366.37146:1390 367.37481:507 368.37817:101	81.06032:54 93.07004:57 95.08548:136 107.08447:74 128.10719:58 142.12254:44 149.02394:50 195.17493:20 235.23975:31 254.24683:54 268.2626:114 296.29068:51 331.31232:45 349.34549:270	2957.45	1453.19	1461.7	1425.53	955.319	1075	1912.5	1937.5	2557.14	1275	795	1072	584	412	428	1650.77	1751.21
92	1.947	367.109	367.10852_1.947	Unknown	[M+H]+		0.467	True	null	null	null	null	null	null	999	False	False	False		False	False	null	null	null	null	null	null	null	91.19	Lipidomics_pos_AH_01	367.10944:1035 368.11279:545 369.11615:148	133.06306:25 367.08081:192 367.10901:444 367.33286:26	2202.13	2614.89	2110.64	2019.15	1659.57	1666.07	1889.29	1726.79	1498.21	1637.5	808	1066	1085	1062	1028	2121.12	1683.46
93	3.693	367.284	367.28387_3.693	Unknown	[M+H]+	similar chromatogram in higher mz_188; similar chromatogram in higher mz_223; found in higher mz's MsMs_223	0.333	True	null	null	null	null	null	null	999	False	False	False		False	False	null	null	null	null	null	null	null	34.23	Lipidomics_pos_CON_01	367.28354:1278 368.28689:301 369.29025:69	69.07041:95 121.10032:42 247.22478:22 367.28473:728	1310.64	1427.66	1163.83	1408.51	1806.38	1189.29	1210.71	1203.57	1112.5	1298.21	1278	1358	1328	1271	1256	1423.51	1202.75
94	18.124	369.35	369.35022_18.124	ST 27:1;O	[M+H-H2O]+	found in higher mz's MsMs_775	0.2	True	9	369.352	C27H46O	ST	HVYWMOMLDIMFJA-UHFFFAOYSA-N	OC1CC2=CCC3C(CCC4(C)C(CCC34)C(C)CCCC(C)C)C2(C)CC1	410	True	True	True		False	False	null	null	86.7	99.6	67.8	22	100	67.92	Lipidomics_pos_BL_04	369.35043:4004 370.35378:1242 371.35714:219	79.05485:122 93.0698:131 119.08511:170 133.10043:149 139.14946:22 147.11642:768 163.14661:72 175.14781:377 201.16251:96 207.20828:51 233.22427:154 257.22641:155 273.25751:88 369.3508:3271	11812.8	14246.8	9474.47	15106.4	13214.9	6021.43	7307.14	7073.21	7150	9021.43	13536	15276	15020	15208	13608	12771.5	7314.62
95	11.834	369.35	369.35028_11.834	ST 27:1;O	[M+H-H2O]+		1	True	9	369.352	C27H46O	ST	HVYWMOMLDIMFJA-UHFFFAOYSA-N	OC1CC2=CCC3C(CCC4(C)C(CCC34)C(C)CCCC(C)C)C2(C)CC1	410	True	True	True		False	False	null	null	88.6	100	84.3	24.7	100	175.79	Lipidomics_pos_CON_04	369.35114:13574 370.35449:3177 371.35785:894	81.0697:514 93.06953:172 95.08437:298 123.11572:172 145.10083:125 159.11678:187 189.16306:159 203.1776:218 229.19473:295 369.32413:54	25480.9	28402.1	26478.7	27751.1	27293.6	20614.3	19862.5	19537.5	17162.5	22421.4	14216	12853	14675	13574	13402	27080.9	19919.4
96	19.112	369.351	369.35056_19.112	ST 27:1;O	[M+H-H2O]+	similar chromatogram in higher mz_383; similar chromatogram in higher mz_639; similar chromatogram in higher mz_689; found in higher mz's MsMs_628; similar chromatogram in higher mz_702; found in higher mz's MsMs_702; similar chromatogram in higher mz_1776; similar chromatogram in higher mz_2057	1	True	9	369.352	C27H46O	ST	HVYWMOMLDIMFJA-UHFFFAOYSA-N	OC1CC2=CCC3C(CCC4(C)C(CCC34)C(C)CCCC(C)C)C2(C)CC1	410	True	True	True		False	False	null	null	90.7	99.5	76.8	28.8	100	717.05	Lipidomics_pos_BL_02	369.3508:47279 370.35415:18390 371.35751:2025	79.05391:138 93.06895:260 107.08534:207 131.08434:27 135.11668:516 145.10071:115 161.13217:889 173.13069:93 187.14644:144 199.14742:17 207.20869:48 229.19469:198 243.20995:214 257.22586:125 369.35107:2366	65770.2	73908.5	47187.2	71959.6	67823.4	74055.4	84426.8	76791.1	68989.3	93976.8	94709	91193	95368	90501	94304	65329.5	79647.5
97	17.579	369.351	369.35056_17.579	ST 27:1;O	[M+H-H2O]+		0.133	True	9	369.352	C27H46O	ST	HVYWMOMLDIMFJA-UHFFFAOYSA-N	OC1CC2=CCC3C(CCC4(C)C(CCC34)C(C)CCCC(C)C)C2(C)CC1	410	True	True	True		False	False	null	null	87.2	99.6	72.6	21.9	100	29.85	Lipidomics_pos_BL_01	369.35056:2172 370.35391:860 371.35727:120	79.05541:71 95.08485:297 97.10128:140 125.13129:101 135.11708:250 145.10059:37 159.11794:25 173.13173:53 201.1629:141 229.19658:108 257.22437:143 273.2738:67 369.22073:78	8044.68	9008.51	6229.79	8787.23	8229.79	3878.57	3957.14	4494.64	3853.57	4794.64	5117	4056	4304	4452	4566	8060	4195.76
98	19.543	369.351	369.35068_19.543	ST 27:1;O	[M+H-H2O]+		0.4	True	9	369.352	C27H46O	ST	HVYWMOMLDIMFJA-UHFFFAOYSA-N	OC1CC2=CCC3C(CCC4(C)C(CCC34)C(C)CCCC(C)C)C2(C)CC1	410	True	True	True		False	False	null	null	89.6	99.4	91.7	23.6	100	260.53	Lipidomics_pos_CON_05	369.35086:24524 370.35421:9381 371.35757:1021	79.05314:94 91.05317:105 95.08519:516 107.08502:330 135.11646:512 145.10083:108 159.11481:209 173.13084:83 193.19456:25 201.16354:187 257.22485:196 273.25464:94	9772.34	9902.13	7259.57	10363.8	11085.1	11692.9	10376.8	10005.4	10025	12757.1	25893	21040	25319	25701	24524	9676.99	10971.2
99	18.413	369.351	369.35077_18.413	ST 27:1;O	[M+H-H2O]+	ion correlated with 694; similar chromatogram in higher mz_705; similar chromatogram in higher mz_763; similar chromatogram in higher mz_1358	0.667	True	9	369.352	C27H46O	ST	HVYWMOMLDIMFJA-UHFFFAOYSA-N	OC1CC2=CCC3C(CCC4(C)C(CCC34)C(C)CCCC(C)C)C2(C)CC1	410	True	True	True		False	False	null	null	88.7	99.6	85.9	27.5	100	124.83	Lipidomics_pos_AH_04	369.34985:10828 370.3532:3659 371.35656:451	79.05279:21 93.06899:36 107.08448:64 133.10196:17 135.11604:100 147.11687:171 159.11615:28 219.20934:31 257.22388:26 369.31174:18	19329.8	23944.7	15348.9	23038.3	18908.5	15241.1	15208.9	15989.3	16742.9	18787.5	26490	22025	24803	22913	24550	20114.1	16393.8
100	18.654	369.351	369.35086_18.654	ST 27:1;O	[M+H-H2O]+	similar chromatogram in higher mz_633; found in higher mz's MsMs_624	1	True	9	369.352	C27H46O	ST	HVYWMOMLDIMFJA-UHFFFAOYSA-N	OC1CC2=CCC3C(CCC4(C)C(CCC34)C(C)CCCC(C)C)C2(C)CC1	410	True	True	True		False	False	null	null	89.1	99.5	78.5	25.5	100	293.93	Lipidomics_pos_BL_01	369.35068:19396 370.35403:8497 371.35739:1085	79.05383:92 93.06949:96 107.08531:139 125.12954:17 145.10078:46 161.13197:538 173.13068:55 187.14729:75 201.16357:45 205.19373:36 243.20811:116 247.24188:34 369.35062:1037	32706.4	37225.5	26687.2	40608.5	35244.7	34635.7	37812.5	42876.8	35080.4	43726.8	48285	40368	50665	44426	40757	34493.8	38826.3
101	3.231	370.295	370.29532_3.231	w/o MS2:CAR 14:1	[M+H]+	similar chromatogram in higher mz_123	0.4	True	4.8	370.295	C21H39NO4	CAR	ABVVZYXTZLEOHP-UHFFFAOYSA-N	O=C([O-])CC(OC(=O)CCCCCCCC=CCCCC)C[N+](C)(C)C	530	True	True	False		False	False	null	null	100	100	null	null	null	37.89	Lipidomics_pos_CON_03	370.29532:1664 371.29867:414 372.30203:90	121.04599:51 149.09824:41 212.09843:26 335.18738:59	2587.23	2665.96	1621.28	2485.11	702.128	1771.43	1612.5	719.643	1123.21	1821.43	1049	854	1664	455	572	2012.82	1409.87
102	11.779	371.311	371.31137_11.779	Unknown	[M+H]+		0.067	False	null	null	null	null	null	null	999	False	False	False		False	False	null	null	null	null	null	null	null	7.44	Lipidomics_pos_CON_01	371.31137:1302 372.31472:0 373.31808:0		1512.77	1257.45	1453.19	1908.51	1553.19	1326.79	1117.86	1526.79	1301.79	1562.5	1302	1179	852	740	817	1537.13	1366.96
103	2.185	371.326	371.32581_2.185	w/o MS2:NAGly 19:1	[M+H]+		0.067	True	6.95	371.327	C21H39NO3	NAGly	SIHHZKXPELSNDB-UHFFFAOYSA-N	O=C(O)CNC(=O)CCCCCCCC=CCCCCCCCCC	530	True	True	False		False	False	null	null	99.5	99.9	null	null	null	13.75	Lipidomics_pos_BL_03	371.32581:1520 372.32916:604 373.33252:73	67.05391:44 89.05978:20 127.14411:17 268.26337:10746 371.32629:541	1412.77	1061.7	1310.64	1225.53	1142.55	705.357	1141.07	2714.29	621.429	735.714	593	634	828	505	421	1230.35	1184.08
104	2.134	372.313	372.31274_2.134	CAR 14:0	[M+H]+	ion correlated with 352	0.333	True	5.58	372.311	C21H41NO4	CAR	PSHXNVGSVNEJBD-UHFFFAOYSA-N	O=C([O-])CC(OC(=O)CCCCCCCCCCCCC)C[N+](C)(C)C	410	True	True	True		False	False	null	null	100	99.9	84.5	88	100	42.35	Lipidomics_pos_AH_04	372.31033:1863 373.31368:324 374.31704:0	81.0698:30 85.02882:2565 107.06108:32 137.13107:34 189.16296:33 269.26663:130 295.17041:10 372.3103:2839	3787.23	4012.77	4695.74	3963.83	3714.89	525	464.286	487.5	476.786	553.571	211	217	243	204	188	4034.73	501.295
105	7.71	375.346	375.34644_7.71	Unknown	[M+H]+	similar chromatogram in higher mz_551	0.867	True	null	null	null	null	null	null	999	False	False	False		False	False	null	null	null	null	null	null	null	43.36	Lipidomics_pos_AH_01	375.34595:1562 376.3493:458 377.35266:38	71.08536:57 133.08366:51 203.01881:18 339.16681:16 375.1395:21 375.22714:57	3323.4	3246.81	2910.64	3095.74	2421.28	2441.07	3164.29	2451.79	2348.21	2153.57	1483	2107	1422	1197	1154	2999.41	2511.7
106	8.853	376.297	376.29675_8.853	Unknown	[M+H]+		0.133	True	null	null	null	null	null	null	999	False	False	False		False	False	null	null	null	null	null	null	null	46.87	Lipidomics_pos_AH_01	376.29675:1622 377.3001:415 378.30346:202	98.98409:16 132.9046:30 171.13821:519 299.19708:16 331.00229:38 376.2796:96	3451.06	1723.4	1929.79	1842.55	1136.17	1353.57	2028.57	1785.71	2328.57	1407.14	812	959	782	325	509	2016.78	1780.96
107	3.911	380.336	380.33636_3.911	Unknown	[M+NH4]+	adduct linked to 90_[M+H]+	0.133	True	null	null	null	null	null	null	999	False	False	False		False	False	null	null	null	null	null	null	null	35.6	Lipidomics_pos_BL_02	380.33664:1067 381.33999:504 382.34335:90	89.05939:1545 130.15758:13 177.11292:265 213.22308:49 251.08984:76 363.31036:3581 380.32248:45	1329.79	1591.49	1551.06	1585.11	1240.43	1271.43	1905.36	1542.86	823.214	917.857	843	1339	990	690	544	1459.65	1292.14
108	1.715	381.252	381.25186_1.715	Unknown	[M+H]+	ion correlated with 43	0.067	True	null	null	null	null	null	null	999	False	False	False		False	False	null	null	null	null	null	null	null	46.25	Lipidomics_pos_BL_03	381.25186:1647 382.25521:373 383.25857:332	135.11719:45 379.98746:26	1104.26	1238.3	914.894	1008.51	970.213	467.857	1053.57	2941.07	485.714	385.714	291	296	674	419	292	1047.07	1066.76
109	2.227	383.14	383.14026_2.227	Unknown	[M+H]+		1	True	null	null	null	null	null	null	999	False	False	False		False	False	null	null	null	null	null	null	null	66.09	Lipidomics_pos_AH_01	383.13956:1936 384.14291:796 385.14627:286	132.90456:41 383.14139:143	4119.15	4748.94	4046.81	3897.87	3414.89	3498.21	3305.36	3073.21	3103.57	3428.57	1824	1651	1988	1846	1952	4044.84	3281.5
110	8.052	383.33	383.3302_8.052	w/o MS2:NAGly 20:2	[M+H]+		0.067	True	6.76	383.327	C22H39NO3	NAGly	SZHAEBFRVCBNCV-UHFFFAOYSA-N	O=C(O)CNC(=O)CCCCCCCCCC=CCC=CCCCCC	530	True	True	False		False	False	null	null	94.4	100	null	null	null	19.05	Lipidomics_pos_CON_03	383.3302:1274 384.33355:1268 385.33691:446	71.08782:21 93.07009:42 123.11678:29 143.08464:20 151.14793:16 173.1315:13 185.13361:19 203.17944:27 219.21005:16 233.22479:23 269.22607:11 348.2117:9 365.29962:35 383.32944:759	1112.77	1519.15	1187.23	1165.96	1017.02	825	880.357	785.714	885.714	1000	848	621	1274	657	626	1200.11	875.96
111	19.261	383.366	383.36606_19.261	ST 28:1;O	[M+H-H2O]+	ion correlated with 1269; ion correlated with 1312	0.333	True	9.56	383.367	C28H48O	ST	SGNBVLSWZMBQTH-UHFFFAOYSA-N	OC1CC2=CCC3C(CCC4(C)C(CCC34)C(C)CCC(C)C(C)C)C2(C)CC1	410	True	True	True		False	False	null	null	100	99.5	80.4	80.2	100	21.94	Lipidomics_pos_CON_02	383.36661:1732 384.36996:667 385.37332:66	79.05437:39 93.06797:72 133.10114:74 145.10226:41 175.11659:40 187.15038:82 193.19221:62 215.18037:29 255.21703:13 287.27353:106 383.36502:1140	1534.04	1648.94	1136.17	1917.02	1363.83	682.143	696.429	785.714	753.571	737.5	1810	1732	1680	1560	1872	1519.47	731.339
112	8.839	383.399	383.39948_8.839	w/o MS2:RIKEN P-VS1 ID-2319 from Blank	[M+H]+		0.2	True	7.45	383.4		Unknown			530	True	True	False		False	False	null	null	99.9	100	null	null	null	19.87	Lipidomics_pos_AH_01	383.39948:1735 384.40283:729 385.40619:75	101.06048:16 109.10067:21 248.12502:9 327.06836:9 383.20673:115	3691.49	1895.74	2110.64	1674.47	1142.55	994.643	1666.07	1941.07	2453.57	1650	532	783	469	182	349	2102.9	1740.69
113	4.308	384.346	384.34644_4.308	w/o MS2:Cer 12:0;2O/11:0;O	[M+H]+	ion correlated with 167	0.133	True	7.04	384.347	C23H47NO4	Cer_HDS	ZHCIVPBXDWPJRN-UHFFFAOYSA-N	O=C(NC(CO)C(O)CCCCCCCCC)C(O)CCCCCCCCC	530	True	True	False		False	False	null	null	99.7	100	null	null	null	17.06	Lipidomics_pos_BL_05	384.34644:3299 385.34979:808 386.35315:203	67.05436:167 81.06942:374 93.06922:148 95.08513:222 128.10684:71 149.13086:271 212.20114:125 226.21494:68 268.26459:79 294.31522:26 303.30594:481 321.31451:1119	2342.55	1942.55	2182.98	2402.13	2717.02	5451.79	4941.07	5044.64	5250	5891.07	1062	936	924	1028	1020	2317.18	5315.65
114	9.944	385.273	385.27271_9.944	Unknown	[M+H]+	ion correlated with 1606; found in higher mz's MsMs_1465	0.333	True	null	null	null	null	null	null	999	False	False	False		False	False	null	null	null	null	null	null	null	11.29	Lipidomics_pos_CON_01	385.27298:1629 386.27633:513 387.27969:189	77.03694:45 98.1021:34 105.07059:51 114.08972:52 125.09559:23 143.08391:54 157.10181:26 185.14108:29 304.32077:17 339.34473:703 368.27182:18	1734.04	1921.28	2191.49	1961.7	2106.38	426.786	469.643	469.643	496.429	633.929	1629	1527	1371	1764	1434	1982.69	499.33
115	2.657	389.268	389.26782_2.657	NAGlySer 14:0;O	[M+H]+	found in higher mz's MsMs_259; similar chromatogram in higher mz_259	0.867	True	4.85	389.265	C19H36N2O6	NAGlySer	PEPFTAZDRRMIPC-UHFFFAOYSA-N	O=C(NC(C(=O)O)CO)CNC(=O)CC(O)CCCCCCCCCCC	410	True	True	True		False	False	null	null	95.5	100	13.2	58.2	100	32.01	Lipidomics_pos_BL_02	389.26813:1155 390.27148:429 391.27484:119	69.06895:17 79.05454:51 101.05941:24 119.08424:35 145.1002:48 203.17735:39 265.01627:27 389.24774:55	3608.51	4248.94	3187.23	4978.72	4372.34	1862.5	2062.5	1833.93	1862.5	2073.21	1785	2181	1834	1870	1957	4078.99	1939.13
116	1.974	390.17	390.16977_1.974	Unknown	[M+H]+		1	True	null	null	null	null	null	null	999	False	False	False		False	False	null	null	null	null	null	null	null	56.32	Lipidomics_pos_AH_01	390.16937:2169 391.17272:827 392.17608:266	91.05346:496 129.06891:66 144.05479:25 176.03343:75 194.09204:36 221.09474:65 238.08446:68 251.08595:64 253.08298:55 268.09491:625 373.22763:59	4614.89	5804.26	4753.19	4851.06	4980.85	4069.64	4233.93	4212.5	4060.71	4121.43	2330	2040	2275	2098	2232	5000.59	4139.62
117	3.232	391.223	391.2233_3.232	w/o MS2:NATau 16:3;O	[M+H]+		0.067	True	4.36	391.226	C18H31NO5S	NATau	DHDKNAPDDZJWOF-UHFFFAOYSA-N	O=C(NCCS(=O)(=O)O)CC(O)CCCC=CCC=CCC=CCC	530	True	True	False		False	False	null	null	96.1	100	null	null	null	6.2	Lipidomics_pos_CON_03	391.2233:1012 392.22665:269 393.23001:80	149.01515:55 275.16403:39	1555.32	1400	789.362	1578.72	395.745	1108.93	900	442.857	750	1210.71	632	586	1012	292	408	1143.86	882.812
118	19.112	391.284	391.2836_19.112	w/o MS2:Dioctyl phthalate (also known as the production of plastic)	[M+H]+		0.2	False	7.431	391.284	C24H38O4	Others	MQIUGAXCHLFZKX-UHFFFAOYSA-N	CCCCCCCCOC(=O)C1=C(C=CC=C1)C(=O)OCCCCCCCC	530	True	True	False		False	False	null	null	99.8	99.3	null	null	null	7.28	Lipidomics_pos_CON_01	391.2836:2870 392.28695:840 393.29031:376		4470.21	3970.21	3889.36	4053.19	3978.72	3746.43	3823.21	3839.29	4062.5	4033.93	2870	2355	2473	2748	2552	4072.69	3901.21
119	7.789	391.284	391.28372_7.789	Dioctyl phthalate (also known as the production of plastic)	[M+H]+	adduct linked to 138_[M+Na]+; found in higher mz's MsMs_1307; adduct linked to 135_[M+NH4]+	1	True	7.431	391.284	C24H38O4	Others	MQIUGAXCHLFZKX-UHFFFAOYSA-N	CCCCCCCCOC(=O)C1=C(C=CC=C1)C(=O)OCCCCCCCC	430	True	True	True		False	False	null	null	85.4	100	74.8	72.3	100	1057.67	Lipidomics_pos_BL_01	391.28409:144265 392.28744:55473 393.2908:7999	71.0852:2618 121.0279:344 149.02338:43701 167.03389:2408	331321	373970	321506	395940	362970	257616	268154	256896	231748	272355	172525	167468	166858	170641	175189	357142	257354
120	13.467	392.291	392.29071_13.467	Unknown	[M+H]+		0.133	False	null	null	null	null	null	null	999	False	False	False		False	False	null	null	null	null	null	null	null	13.89	Lipidomics_pos_CON_05	392.29071:1446 393.29406:564 394.29742:0		1425.53	1751.06	1691.49	1589.36	1295.74	700	655.357	601.786	962.5	708.929	1199	1155	878	1369	1446	1550.48	725.937
121	7.695	392.373	392.37289_7.695	Unknown	[M+H]+		1	True	null	null	null	null	null	null	999	False	False	False		False	False	null	null	null	null	null	null	null	88.61	Lipidomics_pos_AH_01	392.37234:4412 393.37569:1786 394.37905:361	85.1023:24 132.90483:16 133.08588:27 301.27057:10	9387.23	10102.1	8919.15	8919.15	6478.72	6932.14	8989.29	7396.43	6514.29	6017.86	4357	6913	4288	3936	3907	8760.9	7169.53
122	1.662	397.199	397.19934_1.662	Unknown	[M+H-H2O]+	adduct linked to 139_[M+H]+; adduct linked to 166_[M+Na]+	0.6	True	null	null	null	null	null	null	999	False	False	False		False	False	null	null	null	null	null	null	null	25.49	Lipidomics_pos_AH_01	397.20023:1274 398.20358:587 399.20694:94	397.20084:313	2710.64	2663.83	2470.21	2685.11	2895.74	2269.64	2328.57	2155.36	1875	2171.43	2746	1515	1344	1226	1129	2685.66	2160.07
123	3.236	398.326	398.32574_3.236	w/o MS2:CAR 16:1	[M+H]+		0.267	True	5.52	398.327	C23H43NO4	CAR	JFAGPSOZZSTLRF-UHFFFAOYSA-N	O=C([O-])CC(OC(=O)CCCCCCCC=CCCCCCC)C[N+](C)(C)C	530	True	True	False		False	False	null	null	77.1	100	null	null	null	19.06	Lipidomics_pos_AH_02	398.32574:1209 399.32909:433 400.33245:2437	326.1553:56 398.31888:208	2540.43	2572.34	1693.62	2376.6	802.128	1678.57	1287.5	626.786	823.214	1935.71	563	576	864	323	426	1997.53	1270.38
124	2.277	398.326	398.32599_2.277	CAR 16:1	[M+H]+		0.333	True	5.52	398.327	C23H43NO4	CAR	JFAGPSOZZSTLRF-UHFFFAOYSA-N	O=C([O-])CC(OC(=O)CCCCCCCC=CCCCCCC)C[N+](C)(C)C	410	True	True	True		False	False	null	null	95.5	99.9	80.7	12.8	100	57.09	Lipidomics_pos_AH_04	398.32574:3069 399.32909:863 400.33245:159	85.02825:1901 123.11762:25 269.17596:43	6959.57	7327.66	7259.57	6529.79	6548.94	816.071	617.857	655.357	625	625	134	113	115	107	102	6924.89	667.969
125	2.484	399.25	399.25015_2.484	Unknown	[M+H]+		0.467	True	null	null	null	null	null	null	999	False	False	False		False	False	null	null	null	null	null	null	null	28.59	Lipidomics_pos_AH_01	399.24982:1215 400.25317:328 401.25653:200	143.00928:125 299.1629:489	2585.11	2234.04	2485.11	2204.26	2127.66	1546.43	1623.21	1548.21	1460.71	1842.86	1313	1204	4775	1416	630	2327.26	1604.22
126	1.381	400.291	400.29083_1.381	w/o MS2:NAPhe 16:2	[M+H]+	similar chromatogram in higher mz_168	0.8	True	6.27	400.285	C25H37NO3	NAPhe	FZFNSOIPZVQIDI-UHFFFAOYSA-N	O=C(O)C(NC(=O)CCCCCCCC=CCC=CCCC)CC=1C=CC=CC1	530	True	True	False		False	False	null	null	82.4	99.9	null	null	null	24.42	Lipidomics_pos_BL_02	400.29083:1341 401.29418:610 402.29754:76	83.0859:72 132.9035:27 177.11218:136 277.20187:17 309.19568:21 347.21777:18 400.2067:288	2331.91	2521.28	2542.55	2289.36	1982.98	2225	2394.64	1600	1908.93	1896.43	1144	1242	1051	995	1094	2333.56	2004.98
127	2.961	400.341	400.34149_2.961	CAR 16:0	[M+H]+		0.667	True	6.08	400.342	C23H45NO4	CAR	XOMRRQXKHMYMOC-UHFFFAOYSA-N	O=C([O-])CC(OC(=O)CCCCCCCCCCCCCCC)C[N+](C)(C)C	410	True	True	True		False	False	null	null	100	100	86.9	87.4	100	196.39	Lipidomics_pos_AH_02	400.34149:22953 401.34484:5550 402.3482:858	85.02806:798 257.24374:17 400.34125:1641	45742.6	48836.2	44689.4	45244.7	44583	2578.57	2616.07	2521.43	2982.14	2341.07	587	613	671	632	456	45819.3	2607.86
128	4.234	400.378	400.37796_4.234	w/o MS2:RIKEN P-VS1 ID-2605 from Mouse_Brain_WT_N_F1AA	[M+H]+		0.067	True	7.1	400.376		Unknown			530	True	True	False		False	False	null	null	69.5	100	null	null	null	17.67	Lipidomics_pos_AH_02	400.37796:1072 401.38131:259 402.38467:72	73.02887:30 191.0919:19 400.37677:1050	865.957	2280.85	1202.13	631.915	540.426	567.857	1150	907.143	600	419.643	261	372	401	372	220	1103.96	728.906
129	7.572	401.341	401.34113_7.572	w/o MS2:25-hydroxycholecalciferol	[M+H]+		0.733	True	7.21	401.341	C27H44O2	Vitamin_D	JWUBBDSIWDLEOM-UHFFFAOYSA-N	OC1CC(=CC=C2CCCC3(C)C2CCC3C(C)CCCC(O)(C)C)C(=C)CC1	530	True	True	False		False	False	null	null	67.3	100	null	null	null	24.73	Lipidomics_pos_CON_01	401.34113:1901 402.34448:745 403.34784:103	69.06967:26 74.09654:4 81.06974:94 89.06015:13 93.06978:13 103.07385:1 105.07032:18 117.06832:4 123.11647:20 132.90407:19 135.11646:21 143.08649:7 145.1012:21 147.11671:23 157.10101:34 171.11665:5 175.11189:55 183.11649:6 185.13277:16 187.14931:12 197.13255:12 199.14818:18 203.18016:8 207.2108:8 217.15804:6 225.16444:9 237.21844:2 252.18549:3 283.24146:2 291.26324:1 301.28873:3 310.3107:55 323.27…	2334.04	2331.91	2372.34	2551.06	2351.06	1382.14	1887.5	1462.5	1489.29	1785.71	1901	1706	1616	1594	1777	2388.01	1601.7
130	2.86	402.358	402.35785_2.86	w/o MS2:DG O-15:1_5:0	[M+H]+		0.133	True	6.99	402.358	C23H44O4	EtherDG	NFVAUJVIZMQVHG-UHFFFAOYSA-N	O=C(OC(CO)COCCCCCCCCC=CCCCCC)CCCC	530	True	True	False		False	False	null	null	68.4	99.9	null	null	null	28.55	Lipidomics_pos_CON_05	402.35785:1816 403.3612:560 404.36456:112	74.10031:7 93.06616:16 159.11617:7 283.2634:2887 402.35815:2372	2131.91	2204.26	1704.26	1991.49	2110.64	791.071	1467.86	1328.57	1558.93	1057.14	574	818	1534	581	1816	2028.38	1240.27
131	1.739	407.185	407.18466_1.739	Unknown	[M+H]+		0.067	True	null	null	null	null	null	null	999	False	False	False		False	False	null	null	null	null	null	null	null	24.47	Lipidomics_pos_AH_02	407.18466:1265 408.18801:428 409.19137:136	91.05338:59 105.06943:489 222.10266:80 239.1048:105 312.12381:174 372.15936:272	2034.04	2691.49	1770.21	1968.09	1861.7	1466.07	1714.29	1632.14	1662.5	1535.71	800	841	911	878	945	2065.16	1602.03
132	3.813	407.336	407.33578_3.813	Unknown	[M+H]+	adduct linked to 148_[M+NH4]+	0.2	True	null	null	null	null	null	null	999	False	False	False		False	False	null	null	null	null	null	null	null	14.67	Lipidomics_pos_BL_02	407.33636:1461 408.33971:420 409.34307:68	85.10096:20 133.08652:69 213.21861:19 361.32843:17 407.29407:41	2093.62	2323.4	2176.6	2123.4	2225.53	1592.86	2608.93	1821.43	1183.93	1403.57	1072	1649	1254	859	933	2189.07	1721.99
133	6.038	408.308	408.30759_6.038	w/o MS2:RIKEN P-VS1 ID-2698 from Mouse_Feces_WT_N_Ctr	[M+H]+	similar chromatogram in higher mz_654	0.4	True	3.49	408.31		Unknown			530	True	True	False		False	False	null	null	97.5	100	null	null	null	23.09	Lipidomics_pos_AH_01	408.30759:2281 409.31094:704 410.3143:110	130.16252:25 136.07301:106 164.10973:136 179.13188:98 206.15051:224 248.16077:241 250.1772:1860 362.30219:306	4853.19	4004.26	1868.09	2000	1768.09	978.571	1632.14	2682.14	2464.29	1407.14	1258	2150	1186	1028	669	2898.64	1832.59
134	5.655	408.308	408.30771_5.655	w/o MS2:RIKEN P-VS1 ID-2698 from Mouse_Feces_WT_N_Ctr	[M+H]+	ion correlated with 156	0.933	True	3.49	408.31		Unknown			530	True	True	False		False	False	null	null	97.8	100	null	null	null	35.38	Lipidomics_pos_AH_01	408.30771:4827 409.31106:1461 410.31442:314	150.08923:25 206.15479:47 362.30417:49	10270.2	7089.36	2887.23	3763.83	3289.36	1714.29	3308.93	5419.64	4233.93	2271.43	2798	4780	2074	1662	1461	5460.24	3389.31
135	7.795	408.311	408.31055_7.795	w/o MS2:CAR 17:3	[M+NH4]+	adduct linked to 119_[M+H]+	0.267	True	5.32	408.311	C24H41NO4	CAR	ZELKYVPAKIMYJO-UHFFFAOYSA-N	O=C([O-])CC(OC(=O)CCCCCCC=CCC=CCC=CCC)C[N+](C)(C)C	530	True	True	False		False	False	null	null	70.1	100	null	null	null	20.76	Lipidomics_pos_AH_04	408.31055:1545 409.3139:560 410.31726:73	99.0447:21 113.05882:23 133.07881:24 149.02274:4213 165.01544:24 189.08733:8 261.15057:10 335.25613:9 391.28574:25 408.3327:35	1948.94	2521.28	2217.02	3287.23	2474.47	1528.57	1603.57	1553.57	1414.29	1837.5	895	1096	903	969	1261	2490.45	1587.43
136	2.185	409.283	409.28281_2.185	Unknown	[M+H]+		0.067	True	null	null	null	null	null	null	999	False	False	False		False	False	null	null	null	null	null	null	null	16.1	Lipidomics_pos_BL_03	409.28281:1390 410.28616:549 411.28952:209	132.90395:42 268.26019:69	1129.79	991.489	1227.66	993.617	1189.36	644.643	1253.57	2482.14	605.357	583.929	398	423	773	500	291	1106.12	1113.79
137	8.836	413.265	413.26517_8.836	w/o MS2:NAGlySer 16:2;O	[M+H]+		0.2	True	4.97	413.265	C21H36N2O6	NAGlySer	ZLROQDUGSHYFDW-UHFFFAOYSA-N	O=C(O)C(NC(=O)CNC(=O)CC(O)CCCCCC=CCC=CCCC)CO	530	True	True	False		False	False	null	null	99.8	99.9	null	null	null	11.04	Lipidomics_pos_BL_04	413.26517:2378 414.26852:700 415.27188:278	153.12738:20 209.16789:9 340.25992:44 413.26633:2350	4878.72	4012.77	3770.21	4178.72	3025.53	3248.21	3998.21	3935.71	4246.43	3007.14	1739	2118	1903	1515	1527	3972.71	3687.21
138	7.789	413.266	413.26587_7.789	Dioctyl phthalate (also known as the production of plastic)	[M+Na]+	adduct linked to 119_[M+H]+; found in higher mz's MsMs_1342	1	True	7.435	413.266	C24H38O4	Others	MQIUGAXCHLFZKX-UHFFFAOYSA-N	CCCCCCCCOC(=O)C1=CC=CC=C1C(=O)OCCCCCCCC	430	True	True	True		False	False	null	null	82.4	100	92.9	56.5	50	312.74	Lipidomics_pos_BL_03	413.26575:35010 414.2691:9780 415.27246:1052	189.01656:41 413.26532:1884	76812.8	81919.1	70846.8	83329.8	78157.4	66012.5	62133.9	62517.9	61271.4	59360.7	43555	40835	43122	43774	43071	78213	62259.2
139	1.666	415.211	415.21121_1.666	w/o MS2:RIKEN P-VS1 ID-2808 from Mouse_Macrophage_WT_N_F1AA	[M+H]+	adduct linked to 122_[M+H-H2O]+; found in higher mz's MsMs_178; found in higher mz's MsMs_177	1	True	4.04	415.212		Unknown			530	True	True	False		False	False	null	null	99.9	100	null	null	null	1411.29	Lipidomics_pos_CON_01	415.21121:218634 416.21456:86382 417.21792:11711	81.0318:215 107.08459:307 119.08548:22713 129.05498:271 247.0946:52	199460	208500	197879	206826	229385	200655	183268	180443	166737	178707	218634	127557	108013	98906	90170	208410	181962
140	3.538	417.299	417.29916_3.538	NAGlySer 16:0;O	[M+H]+	found in higher mz's MsMs_386; similar chromatogram in higher mz_317	0.2	True	5.62	417.296	C21H40N2O6	NAGlySer	ZNROCQCWMZLATI-UHFFFAOYSA-N	O=C(NC(C(=O)O)CO)CNC(=O)CC(O)CCCCCCCCCCCCC	410	True	True	True		False	False	null	null	100	100	57.7	58.2	100	21.7	Lipidomics_pos_AH_05	417.29904:1209 418.30239:482 419.30575:48	81.06986:45 145.09904:48	1948.94	2519.15	1961.7	2595.74	2572.34	805.357	1114.29	1007.14	889.286	1033.93	682	659	722	619	635	2319.79	969.509
141	4.692	419.237	419.23691_4.692	Unknown	[M+H]+		1	True	null	null	null	null	null	null	999	False	False	False		False	False	null	null	null	null	null	null	null	21.79	Lipidomics_pos_AH_01	419.23663:1543 420.23998:580 421.24334:162	71.08565:34 115.05405:40 181.10046:35 219.11584:65 419.27023:65	3282.98	3782.98	3089.36	3163.83	2757.45	2846.43	2750	2503.57	2312.5	2275	1359	1284	1502	1338	1494	3215.45	2537.79
142	14.505	419.351	419.3511_14.505	Unknown	[M+H]+		1	True	null	null	null	null	null	null	999	False	False	False		False	False	null	null	null	null	null	null	null	19.2	Lipidomics_pos_AH_01	419.34937:1744 420.35272:813 421.35608:312	85.10018:144 149.02303:127 419.18616:119	3710.64	3365.96	3131.91	3185.11	3725.53	2882.14	2776.79	2660.71	2512.5	3003.57	1586	1729	1269	1634	1922	3424.28	2767.57
143	9.438	420.404	420.40405_9.438	Unknown	[M+H]+		0.533	True	null	null	null	null	null	null	999	False	False	False		False	False	null	null	null	null	null	null	null	17.05	Lipidomics_pos_AH_01	420.40338:1351 421.40673:442 422.41009:130	85.10133:94 89.0596:315 95.0856:7 97.10026:19 101.09576:58 125.13517:8 132.90466:8 141.16251:9 171.13733:419 189.14873:24 285.27859:42 294.18045:5 344.30206:3 403.37753:729 420.4032:136	2874.47	2836.17	2753.19	2938.3	2204.26	1900	2657.14	2201.79	2028.57	2067.86	1282	1549	1198	1045	1296	2720.96	2171.34
144	9.01	421.284	421.28418_9.01	Unknown	[M+H]+		0.467	True	null	null	null	null	null	null	999	False	False	False		False	False	null	null	null	null	null	null	null	33.32	Lipidomics_pos_BL_02	421.28378:1450 422.28713:0 423.29049:0	83.08677:7 139.12408:5 155.17812:4 209.06046:7 238.07404:14 251.08156:823 279.12518:6 308.15268:180 350.17111:15 404.37973:16 421.28543:2119	1061.7	5919.15	5274.47	5217.02	5765.96	2223.21	2589.29	3107.14	1698.21	6062.5	1313	1336	736	386	691	4647.15	3136.09
145	6.039	424.282	424.28159_6.039	w/o MS2:LPE O-15:1	[M+H]+		1	True	6.22	424.282	C20H42NO6P	EtherLPE	FEXZKTCCNBBCOA-UHFFFAOYSA-N	O=P(O)(OCCN)OCC(O)COCCCCCCCCC=CCCCCC	530	True	True	False		False	False	null	null	99.8	100	null	null	null	69.26	Lipidomics_pos_AH_01	424.28159:14115 425.28494:3815 426.2883:1301	222.12508:31 237.14792:170	30031.9	25700	11002.1	14868.1	12646.8	6548.21	10771.4	17973.2	14814.3	8896.43	7270	12120	6914	6282	4466	18849.8	11800.7
146	5.656	424.282	424.28174_5.656	w/o MS2:LPE O-15:1	[M+H]+		1	True	6.22	424.282	C20H42NO6P	EtherLPE	FEXZKTCCNBBCOA-UHFFFAOYSA-N	O=P(O)(OCCN)OCC(O)COCCCCCCCCC=CCCCCC	530	True	True	False		False	False	null	null	99.8	100	null	null	null	103.64	Lipidomics_pos_AH_01	424.28174:20031 425.28509:5779 426.28845:1811	222.08885:26 237.14787:241	42619.1	36776.6	15683	19434	18053.2	8610.71	16364.3	26319.6	21233.9	11853.6	10893	16630	9641	8030	6342	26513.2	16876.7
147	2.431	424.342	424.34161_2.431	CAR 18:2	[M+H]+		0.333	True	5.88	424.342	C25H45NO4	CAR	MJLXQSQYKZWZCB-UHFFFAOYSA-N	O=C([O-])CC(OC(=O)CCCCCCCC=CCC=CCCCCC)C[N+](C)(C)C	410	True	True	True		False	False	null	null	100	99.9	81	86	100	14.27	Lipidomics_pos_AH_02	424.34167:1516 425.34502:533 426.34838:149	69.07067:71 83.08532:146 85.0283:804 97.10236:54 121.0993:50 149.02411:112 295.18317:52 407.33084:53 424.30841:67 424.34052:2872	3234.04	3225.53	3353.19	3236.17	2948.94	298.214	335.714	235.714	369.643	285.714	44	47	43	41	38	3199.57	305.112
148	3.796	424.363	424.36264_3.796	Unknown	[M+NH4]+	adduct linked to 132_[M+H]+	1	True	null	null	null	null	null	null	999	False	False	False		False	False	null	null	null	null	null	null	null	26.19	Lipidomics_pos_AH_01	424.36215:2501 425.3655:631 426.36886:328	73.06796:33 89.04953:31 131.06583:17 151.09587:43 213.21324:62 221.1396:62 275.26025:26 405.99008:11 424.36157:272	5321.28	6223.4	5510.64	5712.77	4759.57	4096.43	7525	5085.71	3144.64	3298.21	2997	4712	4106	2504	2430	5505.61	4629.96
149	5.159	425.335	425.33508_5.159	w/o MS2:NAOrn 19:2;O	[M+H]+		0.2	True	6.11	425.337	C24H44N2O4	NAOrn	VQWFXYOXQYCBQQ-UHFFFAOYSA-N	O=C(O)C(NC(=O)CC(O)CCCCCC=CCC=CCCCCCC)CCCN	530	True	True	False		False	False	null	null	97.3	100	null	null	null	16.61	Lipidomics_pos_CON_02	425.33508:1597 426.33843:221 427.34179:41	71.08512:192 85.1004:82 107.06903:17 117.09062:35 131.06943:8 133.08568:230 169.17741:28 213.65395:9 238.14886:15 283.2225:25 324.21506:105 354.22037:9 380.28033:14 415.2587:33 425.29013:208	2129.79	1938.3	1891.49	1551.06	923.404	1637.5	2066.07	1137.5	1021.43	671.429	944	1597	701	590	667	1686.84	1306.63
150	3.127	426.357	426.35739_3.127	CAR 18:1	[M+H]+		0.6	True	6.25	426.358	C25H47NO4	CAR	IPOLTUVFXFHAHI-UHFFFAOYSA-N	O=C([O-])CC(OC(=O)CCCCCCCC=CCCCCCCCC)C[N+](C)(C)C	410	True	True	True		False	False	null	null	100	100	60.7	71.3	100	123.53	Lipidomics_pos_BL_04	426.35733:1261 427.36068:413 428.36404:139	81.06915:28 85.0282:378 121.10115:11 239.14822:6 367.22382:7 391.35703:7 426.32077:63	23672.3	26389.4	24134	25302.1	23368.1	2123.21	1946.43	2217.86	2251.79	1783.93	283	282	250	275	254	24573.2	2064.55
151	4.331	428.373	428.37305_4.331	CAR 18:0	[M+H]+		0.333	True	6.69	428.373	C25H49NO4	CAR	FNPHNLNTJNMAEE-UHFFFAOYSA-N	O=C([O-])CC(OC(=O)CCCCCCCCCCCCCCCCC)C[N+](C)(C)C	410	True	True	True		False	False	null	null	100	100	75.8	86.6	100	63.15	Lipidomics_pos_AH_05	428.37326:6644 429.37661:1952 430.37997:428	81.06831:7 85.02832:152 85.09823:7 144.10083:18 267.26828:7 369.297:46 428.26196:8 428.30453:8 428.34052:20 428.37354:430	15219.1	16236.2	14891.5	15819.1	14136.2	2135.71	2014.29	2237.5	2175	2300	536	565	546	516	545	15260.3	2172.59
152	11.838	428.389	428.38904_11.838	Unknown	[M+H]+		0.067	True	null	null	null	null	null	null	999	False	False	False		False	False	null	null	null	null	null	null	null	10.44	Lipidomics_pos_CON_01	428.38904:1056 429.39239:881 430.39575:0	109.09895:21 301.28528:49 410.37988:74 428.25684:68	1653.19	2046.81	1402.13	1691.49	1051.06	1344.64	1330.36	1326.79	541.071	1207.14	1056	615	1206	1076	968	1569.02	1150.36
153	7.792	429.24	429.23984_7.792	Unknown	[M+H]+	found in higher mz's MsMs_1455	1	True	null	null	null	null	null	null	999	False	False	False		False	False	null	null	null	null	null	null	null	682.6	Lipidomics_pos_AH_01	429.23953:98271 430.24288:27726 431.24624:8840	338.33942:25	209087	223464	202796	236247	216472	170514	167491	165689	166986	169220	110845	105650	110042	106728	108453	217613	167980
154	10.378	429.372	429.37234_10.378	w/o MS2:NAOrn 19:0;O	[M+H]+	ion correlated with 768	1	True	6.86	429.369	C24H48N2O4	NAOrn	NLINSKFNHFZJMM-UHFFFAOYSA-N	O=C(NC(C(=O)O)CCCN)CC(O)CCCCCCCCCCCCCCCC	530	True	True	False		False	False	null	null	93.6	99.9	null	null	null	17.6	Lipidomics_pos_CON_01	429.37234:5237 430.37569:2333 431.37905:469	95.08558:25 163.11256:49 177.0903:51 429.36887:179	5693.62	5978.72	5006.38	6514.89	5925.53	4160.71	4701.79	4117.86	3939.29	4728.57	5237	4875	4752	4965	4697	5823.72	4329.13
155	6.038	430.363	430.36301_6.038	NAE 26:5	[M+H]+		0.933	True	7.56	430.368	C28H47NO2	NAE	SKLYJTADGQXJFC-UHFFFAOYSA-N	O=C(NCCO)CCCCCCCCCC=CCC=CCC=CCC=CCC=CCC	410	True	True	True		False	False	null	null	100	100	10.7	75	100	22.22	Lipidomics_pos_BL_05	430.36386:1247 431.36721:0 432.37057:74	93.07126:12 97.10078:35 178.16812:25 311.29984:42 339.34457:632 430.38351:91	7644.68	7089.36	2759.57	3655.32	3106.38	1587.5	3258.93	4826.79	3737.5	2226.79	2109	3708	2035	1671	1351	4851.17	3127.77
156	5.655	430.363	430.36322_5.655	NAE 26:5	[M+H]+	ion correlated with 134	0.933	True	7.56	430.368	C28H47NO2	NAE	SKLYJTADGQXJFC-UHFFFAOYSA-N	O=C(NCCO)CCCCCCCCCC=CCC=CCC=CCC=CCC=CCC	410	True	True	True		False	False	null	null	100	100	12.4	75	100	25.32	Lipidomics_pos_AH_02	430.36316:3664 431.36651:0 432.36987:0	233.11902:10 243.21608:35 304.30676:28 322.31891:65 339.34399:327 413.20056:11 430.23404:46 430.362:81	8631.91	7795.74	3268.09	4191.49	3670.21	1932.14	3566.07	5775	4614.29	2550	2717	3836	2368	1854	1618	5511.41	3687.59
157	4.15	430.388	430.38815_4.15	w/o MS2:Cer 12:0;2O/13:0;O	[M+H]+		0.067	True	7.4	430.389	C25H51NO4	Cer_HDS	RGVKELHMKHBEHQ-UHFFFAOYSA-N	O=C(NC(CO)C(O)CCCCCCCCC)C(O)CCCCCCCCCCC	530	True	True	False		False	False	null	null	99.6	99.9	null	null	null	13.15	Lipidomics_pos_CON_05	430.38815:1234 431.3915:511 432.39486:125	279.11862:10 311.23004:43 338.32599:25 339.34583:221 430.35205:48	1334.04	1174.47	1000	902.128	1355.32	644.643	1217.86	1210.71	1007.14	826.786	434	538	897	339	1234	1153.67	981.696
158	5.656	431.383	431.38293_5.656	Unknown	[M+H]+		1	True	null	null	null	null	null	null	999	False	False	False		False	False	null	null	null	null	null	null	null	102.17	Lipidomics_pos_AH_01	431.38293:15843 432.38628:4841 433.38964:871	81.06853:57 93.06901:96 133.1022:25 163.14983:42 181.15877:25 226.18147:30 228.19592:56	33708.5	26385.1	9414.89	12663.8	13053.2	4657.14	9548.21	14917.9	12610.7	7503.57	4605	8835	4140	3431	3322	19045.4	9847.68
159	6.037	431.383	431.38327_6.037	Unknown	[M+H]+		1	True	null	null	null	null	null	null	999	False	False	False		False	False	null	null	null	null	null	null	null	84.94	Lipidomics_pos_AH_01	431.38327:13480 432.38662:4317 433.38998:537	109.09751:25 137.09367:17 163.14706:23 175.14961:29 193.158:34 200.2001:32	28680.9	23766	8368.09	11700	11561.7	4032.14	8546.43	13737.5	10696.4	7158.93	4207	7703	3897	3252	2791	16815.4	8834.38
160	1.663	432.238	432.23764_1.663	w/o MS2:RIKEN P-VS1 ID-3065 from Mouse_Macrophage_WT_N_F1AA	[M+H]+		1	True	4.05	432.239		Unknown			530	True	True	False		False	False	null	null	99.1	100	null	null	null	388.7	Lipidomics_pos_CON_01	432.23764:54121 433.24099:23436 434.24435:3684	79.05709:97 103.05177:98 107.08518:1962 117.0691:198 127.03934:170 129.05377:634 277.11758:103 415.1861:164	45536.2	44925.5	42023.4	44868.1	47278.7	43867.9	39878.6	39387.5	36466.1	37292.9	54121	30654	25084	23243	18989	44926.5	39378.8
161	3.712	434.339	434.33899_3.712	w/o MS2:Elaidylphosphocholine	[M+H]+		0.267	True	6.307	434.339	C23H48NO4P	Others	SLVOKEOPLJCHCQ-OUKQBFOZSA-N	CCCCCCCC\C=C\CCCCCCCCOP([O-])(=O)OCC[N+](C)(C)C	530	True	True	False		False	False	null	null	99.9	100	null	null	null	25.93	Lipidomics_pos_CON_03	434.33899:1473 435.34234:336 436.3457:79	434.29843:106	1712.77	2142.55	1831.91	2289.36	1880.85	814.286	851.786	800	735.714	803.571	1264	1218	1473	1284	1273	1971.6	801.071
162	1.649	435.214	435.21405_1.649	Unknown	[M+H]+		0.2	True	null	null	null	null	null	null	999	False	False	False		False	False	null	null	null	null	null	null	null	43.8	Lipidomics_pos_BL_03	435.21387:1440 436.21722:565 437.22058:0	107.08458:53 136.08243:91 418.22278:150	1263.83	793.617	840.426	1525.53	1121.28	685.714	803.571	2571.43	5501.79	2364.29	256	305	393	594	500	1108.88	2385
163	7.795	435.322	435.32214_7.795	w/o MS2:NAOrn 20:4;O	[M+H]+		1	False	5.78	435.322	C25H42N2O4	NAOrn	JTVXKANNMRGXBT-UHFFFAOYSA-N	O=C(O)C(NC(=O)CC(O)CCCCC=CCC=CCC=CCC=CCC)CCCN	530	True	True	False		False	False	null	null	99.9	100	null	null	null	50.14	Lipidomics_pos_CON_04	435.32214:4721 436.32549:0 437.32885:0		9195.74	9531.91	8014.89	9148.94	9076.6	7439.29	7410.71	7091.07	7389.29	7892.86	4440	4542	4440	4721	4112	8993.46	7444.55
164	7.788	436.341	436.34143_7.788	w/o MS2:CAR 19:3	[M+H]+		1	True	5.81	436.342	C26H45NO4	CAR	AQBRAXVKMMUSPP-UHFFFAOYSA-N	O=C([O-])CC(OC(=O)CCCCCCCCC=CCC=CCC=CCC)C[N+](C)(C)C	530	True	True	False		False	False	null	null	99.8	100	null	null	null	290.93	Lipidomics_pos_AH_05	436.34143:40099 437.34478:11860 438.34814:1759	113.13293:54	67723.4	74151.1	72708.5	79610.6	85317	48816.1	51760.7	51814.3	49926.8	62783.9	21160	21809	20302	23090	24137	75902.3	53020.6
165	7.262	436.399	436.39893_7.262	Unknown	[M+H]+	similar chromatogram in higher mz_839	1	True	null	null	null	null	null	null	999	False	False	False		False	False	null	null	null	null	null	null	null	98.68	Lipidomics_pos_AH_01	436.39905:10182 437.4024:3921 438.40576:594	89.0593:199 133.08505:34 195.12215:27 363.30896:52	21663.8	21966	18759.6	20253.2	13904.3	16132.1	22214.3	15782.1	16200	12789.3	11164	16407	10045	8136	8051	19309.2	16623.5
166	1.666	437.193	437.19281_1.666	Unknown	[M+Na]+	adduct linked to 122_[M+H-H2O]+	1	True	null	null	null	null	null	null	999	False	False	False		False	False	null	null	null	null	null	null	null	73.13	Lipidomics_pos_AH_01	437.19312:3184 438.19647:782 439.19983:255	437.13388:53 437.19409:850	6774.47	7191.49	6559.57	6540.43	6857.45	6757.14	6248.21	6589.29	5450	5471.43	7136	4586	4210	3518	3289	6784.55	6103.37
167	4.279	439.357	439.35654_4.279	w/o MS2:NAOrn 20:2;O	[M+H-H2O]+	adduct linked to 176_[M+H]+; found in higher mz's MsMs_176	0.333	True	6.22	439.353	C25H46N2O4	NAOrn	ATRBJIIDPVKZBC-UHFFFAOYSA-N	O=C(O)C(NC(=O)CC(O)CCCCCCCC=CCC=CCCCCC)CCCN	530	True	True	False		False	False	null	null	93.9	100	null	null	null	84.81	Lipidomics_pos_BL_04	439.35654:6656 440.35989:2810 441.36325:487	95.08494:322 107.08454:52 121.10121:53 133.1019:35 163.14685:68 173.13072:103 175.14735:100 187.14825:90 199.11076:60 201.16344:115 213.16313:144 227.17958:40 231.13773:64 240.14986:29 245.15356:154 255.21042:87 275.1962:42 283.23953:48 301.21616:27 355.25867:13 393.35095:712 421.30405:25 439.31641:31	91.4894	25.5319	36.1702	0	0	10641.1	11242.9	11798.2	11885.7	9516.07	12	6	21	24	10	30.8245	11016.8
168	1.384	444.316	444.31583_1.384	w/o MS2:NATau 22:2	[M+H]+		0.133	True	6.93	444.314	C24H45NO4S	NATau	HAHALPIGMOFERK-UHFFFAOYSA-N	O=C(NCCS(=O)(=O)O)CCCCCCCCCCCC=CCC=CCCCCC	530	True	True	False		False	False	null	null	98.7	99.8	null	null	null	14.1	Lipidomics_pos_CON_02	444.31583:1040 445.31918:446 446.32254:111	117.09035:146 383.27136:26 427.28998:273 444.27161:924	1853.19	1642.55	1740.43	1640.43	1510.64	1655.36	1853.57	1408.93	1501.79	1344.64	841	1040	866	778	784	1677.21	1552.81
169	10.656	447.345	447.34515_10.656	Diisodecyl phthalate (also known as the production of plastic)	[M+H]+		1	True	8.234	447.347	C28H46O4	Others	ZVFDTKUVRCTHQE-UHFFFAOYSA-N	CC(C)CCCCCCCOC(=O)C1=C(C=CC=C1)C(=O)OCCCCCCCC(C)C	430	True	True	True		False	False	null	null	82.6	100	72.1	77.2	75	40.8	Lipidomics_pos_CON_03	447.34552:3455 448.34887:1432 449.35223:335	71.08469:25 85.1012:75 149.02214:948 167.03372:111	5110.64	7523.4	5240.43	9834.04	7982.98	6135.71	7466.07	5480.36	4141.07	6300	3660	3697	3455	2793	4256	7139.04	5904.44
170	10.288	447.346	447.3457_10.288	w/o MS2:Diisodecyl phthalate (also known as the production of plastic)	[M+H]+		0.067	True	8.234	447.347	C28H46O4	Others	ZVFDTKUVRCTHQE-UHFFFAOYSA-N	CC(C)CCCCCCCOC(=O)C1=C(C=CC=C1)C(=O)OCCCCCCCC(C)C	530	True	True	False		False	False	null	null	99.3	100	null	null	null	47.15	Lipidomics_pos_AH_05	447.3457:3541 448.34905:1181 449.35241:177	132.90349:34 149.02312:800 447.34119:138	1163.83	1302.13	1608.51	1542.55	7534.04	1214.29	1283.93	1158.93	1123.21	2951.79	1450	1193	881	681	1804	2630.13	1546.63
171	5.012	447.348	447.34808_5.012	w/o MS2:Diisodecyl phthalate (also known as the production of plastic)	[M+H]+	similar chromatogram in higher mz_1762; similar chromatogram in higher mz_172	0.667	True	8.234	447.347	C28H46O4	Others	ZVFDTKUVRCTHQE-UHFFFAOYSA-N	CC(C)CCCCCCCOC(=O)C1=C(C=CC=C1)C(=O)OCCCCCCCC(C)C	530	True	True	False		False	False	null	null	99.3	99.9	null	null	null	19.56	Lipidomics_pos_CON_02	447.34808:2374 448.35143:303 449.35479:139	71.08492:229 73.06512:127 85.10059:165 113.13159:18 131.0692:25 169.19328:32 207.63985:41 249.17276:27 291.73706:31 296.18256:9 309.18744:50 336.31253:9 346.22794:70 354.74118:144 397.23544:13 429.30054:15 447.34518:235	2751.06	2923.4	2659.57	2214.89	1582.98	2444.64	3205.36	1810.71	1476.79	1525	1236	2374	1129	807	1144	2425.82	2092.81
172	5.014	447.85	447.85031_5.014	Unknown	[M+H]+		0.067	False	null	null	null	null	null	null	999	False	False	False		False	False	null	null	null	null	null	null	null	55.38	Lipidomics_pos_CON_02	447.85031:1118 448.85366:63 449.85702:0		1708.51	1282.98	1221.28	887.234	738.298	1105.36	1358.93	814.286	623.214	650	712	1118	570	351	526	1167.85	910.246
173	5.44	452.394	452.39426_5.44	Unknown	[M+H]+		0.2	True	null	null	null	null	null	null	999	False	False	False		False	False	null	null	null	null	null	null	null	15.61	Lipidomics_pos_BL_02	452.39392:1327 453.39727:343 454.40063:55	71.08563:110 83.08469:29 117.09154:18 133.08604:188 167.03299:7 227.19762:23 279.15695:33 417.37003:9 452.35324:41	1504.26	2085.11	1900	2036.17	1578.72	1201.79	2369.64	1805.36	950	1180.36	998	1366	1365	739	714	1820.85	1501.76
174	1.666	453.167	453.16687_1.666	Unknown	[M+H]+		1	True	null	null	null	null	null	null	999	False	False	False		False	False	null	null	null	null	null	null	null	714.38	Lipidomics_pos_AH_01	453.16687:25962 454.17022:9177 455.17358:3424	453.14221:206	55238.3	60057.4	56697.9	59474.5	59191.5	54657.1	50116.1	47400	45125	49498.2	47779	34382	32573	28975	25692	58131.4	49359.4
175	9.134	457.271	457.27145_9.134	Unknown	[M+H]+		0.067	True	null	null	null	null	null	null	999	False	False	False		False	False	null	null	null	null	null	null	null	23.45	Lipidomics_pos_CON_02	457.27145:1734 458.2748:504 459.27816:227	366.37018:21 440.29858:32 457.2706:424	2238.3	2429.79	2138.3	2689.36	2538.3	1862.5	2105.36	2105.36	1757.14	1750	1196	1734	1209	1058	996	2406.99	1916
176	4.279	457.367	457.36749_4.279	w/o MS2:NAGly 8:0;O(FA 15:1)	[M+H]+	adduct linked to 167_[M+H-H2O]+	0.333	True	6.52	457.364	C25H45NO5	NAGly	RQBKTVSWRYHUKA-UHFFFAOYSA-N	O=C(O)CNC(=O)CCCC(OC(=O)CCCCCCCC=CCCCCC)CCC	530	True	True	False		False	False	null	null	92.7	100	null	null	null	25.88	Lipidomics_pos_BL_02	457.36749:1699 458.37084:961 459.3742:99	93.06182:41 147.11574:66 149.13307:56 175.14835:57 235.17081:58 303.23138:26 411.3331:83 457.34317:178	0	0	0	0	25.5319	2891.07	3033.93	3032.14	2846.43	2683.93	0	0	16	12	10	5.10638	2897.46
177	1.666	459.249	459.24854_1.666	Unknown	[M+H]+		1	True	null	null	null	null	null	null	999	False	False	False		False	False	null	null	null	null	null	null	null	142.34	Lipidomics_pos_BL_04	459.24823:7078 460.25158:0 461.25494:0	415.21414:53	14510.6	15048.9	14859.6	15585.1	14731.9	15319.6	13246.4	12801.8	12639.3	13160.7	12714	9664	8753	8077	6707	14946.9	13433.4
178	1.666	460.269	460.26852_1.666	RIKEN P-VS1 ID-3617 from Mouse_Macrophage_WT_N_F1AA	[M+H]+		1	True	4.04	460.27		Unknown			430	True	True	True		False	False	null	null	82.1	100	89.4	61.4	50	1739.14	Lipidomics_pos_AH_01	460.26886:75019 461.27221:34342 462.27557:4898	91.05211:295 107.08555:486 119.08539:7886 277.11142:52 397.20285:111	159615	173900	164200	170996	202998	135225	131243	142498	139157	163045	99650	70005	58997	57051	66253	174342	142233
179	13.532	462.295	462.29526_13.532	w/o MS2:LPC O-15:3	[M+H]+		0.067	True	5.34	462.298	C23H44NO6P	EtherLPC	KWFGYPJKLWPBOS-UHFFFAOYSA-N	O=P([O-])(OCC[N+](C)(C)C)OCC(OCCCCCC=CCC=CCC=CCC)CO	530	True	True	False		False	False	null	null	96.5	99.7	null	null	null	24.02	Lipidomics_pos_CON_04	462.29526:1180 463.29861:0 464.30197:0	341.01971:239 445.12088:181	540.426	663.83	497.872	570.213	523.404	573.214	800	648.214	369.643	333.929	978	876	774	1180	708	558.803	545.223
180	11.319	463.331	463.33054_11.319	DG 23:1	[M+Na]+		0.867	True	7.33	463.339	C26H48O5	DG	CWOXQNVXDIVEKF-UHFFFAOYSA-N	O=C(OCC(OC(=O)CCCCCCCC=CCCCCC)CO)CCCCCCC	420	True	True	True		False	False	null	null	94.3	99.9	58.1	75	100	42.8	Lipidomics_pos_BL_02	463.33115:2670 464.3345:1174 465.33786:220	147.06737:25 221.07077:20 239.08189:174 251.08136:929 277.10785:15 281.04004:38 341.01834:25 342.01926:51 351.20682:514 364.21259:40 463.2627:24 463.3309:3694	1989.36	8700	8000	7529.79	8819.15	3676.79	4767.86	4444.64	2871.43	8867.86	2081	2126	1170	707	1220	7007.15	4925.87
181	7.799	464.373	464.37271_7.799	w/o MS2:CAR 21:3	[M+H]+		0.467	True	6.3	464.373	C28H49NO4	CAR	ZPOWZIAUGKOQTA-UHFFFAOYSA-N	O=C([O-])CC(OC(=O)CCCCCCCC=CCC=CCC=CCCCCC)C[N+](C)(C)C	530	True	True	False		False	False	null	null	99.8	100	null	null	null	17.56	Lipidomics_pos_CON_05	464.37271:1589 465.37606:574 466.37942:0	227.20302:31 447.25177:13	2142.55	2272.34	1829.79	2089.36	2591.49	1567.86	1796.43	1319.64	1317.86	2005.36	1433	1484	1422	1363	1589	2185.19	1601.76
182	8.974	464.43	464.42966_8.974	Unknown	[M+H]+		0.867	True	null	null	null	null	null	null	999	False	False	False		False	False	null	null	null	null	null	null	null	25.71	Lipidomics_pos_AH_01	464.42972:1843 465.43307:720 466.43643:130	85.10119:102 117.08949:21 130.15802:10 141.16066:10 251.18451:271 285.27634:97 369.26089:11 447.40482:525 464.4288:930	3921.28	3651.06	3185.11	3257.45	2670.21	2741.07	3191.07	2848.21	2435.71	2258.93	1779	2424	1570	1407	1464	3337.15	2695.02
183	7.278	464.43	464.43005_7.278	Unknown	[M+H]+		0.133	True	null	null	null	null	null	null	999	False	False	False		False	False	null	null	null	null	null	null	null	19.66	Lipidomics_pos_AH_02	464.42996:1174 465.43331:454 466.43667:56	147.06329:15 251.18741:30 429.20532:11 464.39261:116	2176.6	2497.87	1838.3	1900	1934.04	1328.57	2191.07	1512.5	1501.79	1400	788	1030	598	631	580	2069.36	1586.96
184	5.736	466.328	466.32803_5.736	LPE O-18:1	[M+H]+		0.267	True	6.95	466.329	C23H48NO6P	EtherLPE	CDONWGCJDDHTLP-UHFFFAOYSA-N	O=P(O)(OCCN)OCC(O)COCCCCCCCCC=CCCCCCCCC	410	True	True	True		False	False	null	null	97.4	100	65.3	55.7	100	21.7	Lipidomics_pos_CON_03	466.32803:1154 467.33138:300 468.33474:72	98.98296:10 294.31543:359 392.28952:37 448.29337:42 449.38763:27	821.277	1004.26	876.596	1057.45	944.681	742.857	794.643	903.571	889.286	960.714	1113	1128	1154	1028	1148	940.745	858.594
185	2.911	466.328	466.32846_2.911	w/o MS2:Cer 12:2;2O/16:4	[M+H]+		0.6	True	6.48	466.329	C28H45NO3	Cer_NS	MRPNYDKIRHQUOT-UHFFFAOYSA-N	O=C(NC(CO)C(O)C=CCCC=CCCC)CCC=CCC=CCC=CCC=CCC	530	True	True	False		False	False	null	null	73.8	99.9	null	null	null	29.85	Lipidomics_pos_CON_03	466.32846:2084 467.33181:660 468.33517:53	124.99929:85 181.02542:171 466.28531:113	2510.64	2657.45	2495.74	2529.79	2257.45	1023.21	1051.79	985.714	1023.21	1175	1824	1839	2084	1813	1783	2490.51	1051.74
186	17.448	467.408	467.40826_17.448	Unknown	[M+H]+		0.067	True	null	null	null	null	null	null	999	False	False	False		False	False	null	null	null	null	null	null	null	20.73	Lipidomics_pos_AH_02	467.40826:1180 468.41161:422 469.41497:162	67.05332:104 467.409:1860	974.468	2510.64	1357.45	2393.62	1789.36	992.857	1105.36	1173.21	623.214	1273.21	686	628	594	600	524	1805.35	1033.57
187	2.258	468.308	468.30823_2.258	LPC 14:0	[M+H]+		0.467	True	5.72	468.308	C22H46NO7P	LPC	VXUOFDJKYGDUJI-UHFFFAOYSA-N	O=C(OCC(O)COP(=O)([O-])OCC[N+](C)(C)C)CCCCCCCCCCCCC	410	True	True	True		False	False	null	null	100	99.9	91	78.5	100	24.32	Lipidomics_pos_BL_01	468.3085:1019 469.31185:453 470.31521:116	86.09611:56 184.07355:1684 239.15015:8 258.10855:19 371.22775:8 468.30838:426	1208.51	1629.79	1938.3	1487.23	1565.96	1819.64	1819.64	1828.57	2035.71	1857.14	1156	1092	1117	1133	1029	1566.62	1871.79
188	3.691	468.388	468.38849_3.691	w/o MS2:Cer 12:1;2O/19:5	[M+H]+	similar chromatogram in higher mz_223	1	True	7.33	468.384	C31H51NO3	Cer_NS	OFSBMBOLKXPXSU-UHFFFAOYSA-N	O=C(NC(CO)C(O)C=CCCCCCCC)CCC=CCC=CCC=CCC=CCC=CCC	530	True	True	False		False	False	null	null	88.8	99.9	null	null	null	44.62	Lipidomics_pos_CON_02	468.38849:5536 469.39184:1583 470.3952:328	85.10122:24 177.11217:25 301.27689:13	5693.62	6991.49	6906.38	6689.36	5482.98	5116.07	8555.36	5789.29	3846.43	3860.71	3630	5536	4219	3037	2633	6353.09	5433.53
189	2.285	468.388	468.38849_2.285	w/o MS2:Cer 12:1;2O/19:5	[M+H]+		0.333	True	7.33	468.384	C31H51NO3	Cer_NS	OFSBMBOLKXPXSU-UHFFFAOYSA-N	O=C(NC(CO)C(O)C=CCCCCCCC)CCC=CCC=CCC=CCC=CCC=CCC	530	True	True	False		False	False	null	null	88.8	99.9	null	null	null	18.84	Lipidomics_pos_CON_03	468.38849:1503 469.39184:680 470.3952:108	86.09657:40 133.08533:122 283.17432:144 327.17133:68 450.29813:120 451.36246:540	2819.15	1797.87	2570.21	1544.68	1731.91	932.143	2458.93	2046.43	932.143	957.143	672	601	1503	798	870	2092.77	1464.67
190	10.669	469.328	469.328_10.669	w/o MS2:NAGlySer 20:2;O	[M+H]+		0.133	True	6.1	469.327	C25H44N2O6	NAGlySer	RILVLTKIPHHUGT-UHFFFAOYSA-N	O=C(O)C(NC(=O)CNC(=O)CC(O)CCCCCCCC=CCC=CCCCCC)CO	530	True	True	False		False	False	null	null	99.7	99.9	null	null	null	21.87	Lipidomics_pos_CON_05	469.328:1904 470.33135:839 471.33471:130	189.01662:52 329.17004:278	2072.34	2897.87	2153.19	3951.06	2970.21	2608.93	2830.36	2500	1814.29	2721.43	1434	1290	1428	1097	1904	2808.91	2495.13
191	4.875	469.361	469.36069_4.875	w/o MS2:NAGly 8:0;O(FA 16:2)	[M+H]+		0.733	True	6.41	469.364	C26H45NO5	NAGly	ONCCAFAPDLKMOX-UHFFFAOYSA-N	O=C(O)CNC(=O)CCCC(OC(=O)CCCCCCCC=CCC=CCCC)CCC	530	True	True	False		False	False	null	null	95.9	100	null	null	null	21.26	Lipidomics_pos_CON_02	469.36069:2589 470.36404:858 471.3674:0	85.10166:130 111.11491:33 132.90559:17 155.09834:61 169.18761:34 219.12288:21 257.23285:13 309.19101:36 323.72372:32 335.76157:31 348.72021:21 371.22672:20 424.30179:26 459.2843:23 460.84695:265 469.36017:578	3091.49	2980.85	2565.96	2436.17	1510.64	2860.71	3491.07	1766.07	1782.14	1469.64	1661	2589	1084	1102	1260	2516.97	2274.35
192	4.874	469.864	469.86353_4.874	Unknown	[M+H]+		0.133	False	null	null	null	null	null	null	999	False	False	False		False	False	null	null	null	null	null	null	null	155.34	Lipidomics_pos_CON_02	469.86353:1312 470.86688:86 471.87024:0		1644.68	1455.32	1538.3	1276.6	865.957	1407.14	1871.43	969.643	885.714	817.857	690	1312	634	489	544	1356.38	1190.31
193	8.375	473.317	473.3172_8.375	DG 24:3	[M+Na]+		0.6	True	6.82	473.324	C27H46O5	DG	VYKPCNPKUAMLQA-UHFFFAOYSA-N	O=C(OCC(OC(=O)CCCCCC=CCC=CCC=CCC)CO)CCCCCCC	420	True	True	True		False	False	null	null	100	100	64.8	75	100	28.27	Lipidomics_pos_AH_04	473.31812:1088 474.32147:481 475.32483:304	125.10028:3 186.22296:3 295.20041:3 336.32507:5 393.24463:3 473.28574:63	2757.45	2302.13	1763.83	2314.89	2044.68	1625	1810.71	3367.86	4451.79	3858.93	1607	1006	966	1246	1206	2236.91	3022.72
194	14.509	475.414	475.41376_14.509	Unknown	[M+H]+		1	True	null	null	null	null	null	null	999	False	False	False		False	False	null	null	null	null	null	null	null	65.34	Lipidomics_pos_AH_01	475.41296:5186 476.41631:1820 477.41967:333	107.04878:116 149.06015:43 163.10986:17 167.06857:36 205.10789:17 475.16263:18 475.31958:18 475.34415:18	11034	10574.5	12236.2	11817	13240.4	9866.07	9342.86	9732.14	10458.9	11267.9	5341	5444	5030	5046	5439	11780.6	10133.2
195	3.396	480.308	480.30832_3.396	LPE 18:1	[M+H]+		0.333	True	6.41	480.308	C23H46NO7P	LPE	PYVRVRFVLRNJLY-UHFFFAOYSA-N	O=C(OCC(O)COP(=O)(O)OCCN)CCCCCCCC=CCCCCCCCC	410	True	True	True		False	False	null	null	100	100	72.6	74.7	100	47.65	Lipidomics_pos_CON_02	480.30832:2488 481.31167:905 482.31503:135	125.09935:17 198.05392:52 216.06332:83 281.0517:38 339.28979:6716 371.10437:18 480.21622:106 480.2865:159	1974.47	2359.57	2044.68	2136.17	2146.81	1878.57	2214.29	2010.71	2455.36	2498.21	2326	2488	2481	2318	2233	2132.63	2211.94
196	3.764	480.344	480.34409_3.764	w/o MS2:Cer 12:2;2O/17:4	[M+H]+		1	True	6.6	480.345	C29H47NO3	Cer_NS	AVUPTUJEMLICEL-UHFFFAOYSA-N	O=C(NC(CO)C(O)C=CCCC=CCCC)CCCC=CCC=CCC=CCC=CCC	530	True	True	False		False	False	null	null	76.6	100	null	null	null	42.68	Lipidomics_pos_CON_03	480.34409:3736 481.34744:971 482.3508:295	83.08673:12 97.10134:28 149.04364:30 166.06241:60 181.02591:142 223.06242:37 308.29294:91 462.29858:238 480.34348:4334	4548.94	5168.09	4721.28	5306.38	4693.62	2478.57	2603.57	2283.93	2403.57	2250	3595	3563	3736	3700	3578	4887.85	2403.93
197	6.898	480.425	480.42548_6.898	Unknown	[M+H]+		1	True	null	null	null	null	null	null	999	False	False	False		False	False	null	null	null	null	null	null	null	173.09	Lipidomics_pos_AH_01	480.4252:14523 481.42855:4250 482.43191:719	83.08594:13 99.11752:18 133.0872:33 169.19466:14 177.11171:31 213.21997:42 239.14931:33 281.05219:10 407.30719:9 407.33704:42	30900	31295.7	27046.8	26255.3	20117	21853.6	31271.4	19975	19033.9	17453.6	14052	23872	12074	10332	10315	27122.7	21917.5
198	3.485	482.287	482.28723_3.485	PE 17:0	[M+H]+		0.333	True	5.48	482.288	C22H44NO8P	PE	ZSYVEHQZVRMZOP-UHFFFAOYSA-N	O=C(OCC(OC(=O)CCCCCC)COP(=O)(O)OCCN)CCCCCCCCC	420	True	True	True		False	False	null	null	91.6	100	72.9	72.3	100	20.53	Lipidomics_pos_BL_03	482.28696:1264 483.29031:308 484.29367:147	67.05526:23 85.10159:62 239.23846:46 281.0563:28 282.27917:67 339.28656:21 341.26877:3274 447.33224:23 482.28549:158	834.043	906.383	831.915	927.66	802.128	2598.21	2285.71	2257.14	1925	2301.79	716	674	781	669	665	860.346	2273.59
199	4.995	482.323	482.32336_4.995	LPE 18:0	[M+H]+		0.667	True	6.82	482.324	C23H48NO7P	LPE	BBYWOYAFBUOUFP-UHFFFAOYSA-N	O=C(OCC(O)COP(=O)(O)OCCN)CCCCCCCCCCCCCCCCC	410	True	True	True		False	False	null	null	100	100	51.3	58	100	22.77	Lipidomics_pos_CON_03	482.32382:1373 483.32717:363 484.33053:78	177.11356:62 283.1734:63 341.30438:1015 357.06644:19 421.27057:75 482.32468:358	602.128		668.085	610.638	619.149	2760.71	3219.64	2650	2569.64	3173.21	1733	1434	1373	1447	1580	623.324	2874.35
200	3.924	482.361	482.36075_3.924	w/o MS2:Cer 12:2;2O/17:3	[M+H]+		0.133	True	6.96	482.361	C29H49NO3	Cer_NS	JFUHLBWXYCGJHV-UHFFFAOYSA-N	O=C(NC(CO)C(O)C=CCCC=CCCC)CCCCCCC=CCC=CCC=CCC	530	True	True	False		False	False	null	null	74.3	100	null	null	null	14.14	Lipidomics_pos_CON_05	482.36075:1183 483.3641:378 484.36746:63	86.09645:45 177.11276:25 207.02887:13 283.17542:79 373.09781:10 482.33167:122	842.553	876.596	861.702	872.34	714.894	894.643	975	978.571	991.071	907.143	1120	1078	1214	1156	1183	833.271	949.688
201	13.468	484.281	484.28082_13.468	Unknown	[M+H]+	similar chromatogram in higher mz_487	0.067	True	null	null	null	null	null	null	999	False	False	False		False	False	null	null	null	null	null	null	null	55.52	Lipidomics_pos_CON_05	484.28082:1035 485.28417:618 486.28753:0	105.07479:50 441.23456:109 484.25891:92 484.28088:805	1089.36	912.766	1048.94	887.234	955.319	401.786	221.429	271.429	326.786	521.429	936	763	950	1013	1035	978.537	348.437
202	12.516	484.282	484.28232_12.516	Unknown	[M+H]+	similar chromatogram in higher mz_956; found in higher mz's MsMs_956; similar chromatogram in higher mz_390	0.267	True	null	null	null	null	null	null	999	False	False	False		False	False	null	null	null	null	null	null	null	63.05	Lipidomics_pos_CON_01	484.28125:1266 485.2846:784 486.28796:407	484.26004:153 484.28375:921	1165.96	1325.53	1514.89	1842.55	1408.51	842.857	721.429	676.786	585.714	1014.29	1266	1614	863	1255	1269	1451.49	768.036
203	10.656	485.301	485.30133_10.656	Unknown	[M+H]+		1	True	null	null	null	null	null	null	999	False	False	False		False	False	null	null	null	null	null	null	null	47.24	Lipidomics_pos_AH_01	485.30118:2478 486.30453:838 487.30789:396	467.34006:18	5272.34	7444.68	6312.77	9987.23	7878.72	6723.21	8167.86	6194.64	4903.57	7400	3358	3014	2894	2927	3628	7379.36	6677.79
204	10.329	485.302	485.30203_10.329	Unknown	[M+H]+		0.067	True	null	null	null	null	null	null	999	False	False	False		False	False	null	null	null	null	null	null	null	68.64	Lipidomics_pos_AH_05	485.30203:4060 486.30538:1190 487.30874:507	186.22066:23 485.10599:66	1751.06	1617.02	1972.34	3012.77	8638.3	1503.57	2776.79	1373.21	1510.71	3657.14	1192	846	1039	710	1866	3398.16	2164.17
205	1.668	486.268	486.26755_1.668	w/o MS2:LPE 19:5	[M+H]+		0.467	True	5.04	486.262	C24H40NO7P	LPE	QLAUTYLEKFFTLA-UHFFFAOYSA-N	O=C(OCC(O)COP(=O)(O)OCCN)CCC=CCC=CCC=CCC=CCC=CCC	530	True	True	False		False	False	null	null	83.3	99.9	null	null	null	24.36	Lipidomics_pos_BL_05	486.26755:1448 487.2709:274 488.27426:445	119.08548:1155 307.13403:151	2165.96	2380.85	2472.34	2423.4	2717.02	2189.29	1592.86	1944.64	1621.43	2585.71	919	730	859	754	764	2431.91	1986.5
206	1.666	488.3	488.30042_1.666	w/o MS2:SL 12:2;O/13:1;O	[M+H]+		1	True	5.65	488.304	C25H45NO6S	SL	JJTSGHZDHSPQRL-UHFFFAOYSA-N	O=C(N(CC(O)C=CCCC=CCCC)CS(=O)(=O)O)C(O)CCCCCCC=CCCC	530	True	True	False		False	False	null	null	93.8	99.9	null	null	null	71.01	Lipidomics_pos_CON_01	488.30042:7681 489.30377:3168 490.30713:913	74.09631:1340 119.08451:183 415.21176:116 488.29745:174	5157.45	4817.02	4770.21	4812.77	6480.85	5401.79	4694.64	4433.93	4155.36	5760.71	7681	4763	4039	3727	3742	5207.21	4889.2
207	9.71	488.394	488.39383_9.71	TG 24:0|TG 8:0_8:0_8:0	[M+NH4]+	ion correlated with 226; adduct linked to 212_[M+Na]+	0.133	True	7.49	488.395	C27H50O6	TG	VLPFTAMPNXLGLX-UHFFFAOYSA-N	O=C(OCC(OC(=O)CCCCCCC)COC(=O)CCCCCCC)CCCCCCC	410	True	True	True		False	False	null	null	100	100	78.6	81.7	100	74.02	Lipidomics_pos_AH_01	488.39383:3412 489.39718:1420 490.40054:158	103.07587:16 127.11159:58 221.08232:5 271.1918:12 327.25317:634 453.35114:24 488.3924:28	7259.57	976.596	931.915	1187.23	925.532	812.5	5558.93	826.786	767.857	725	561	622	533	819	444	2255.9	1738.28
208	4.741	491.374	491.37415_4.741	DG 25:1	[M+Na]+	similar chromatogram in higher mz_209; similar chromatogram in higher mz_2051	0.733	True	8.07	491.371	C28H52O5	DG	ZFNLDEZNXCUYHV-UHFFFAOYSA-N	O=C(OCC(OC(=O)CCCCCCCC=CCCCCCCC)CO)CCCCCCC	420	True	True	True		False	False	null	null	100	99.9	48.4	75	100	24.04	Lipidomics_pos_CON_05	491.37338:1102 492.37673:280 493.38009:87	71.08567:118 85.10063:59 87.04349:53 113.1335:24 124.08036:55 132.90395:65 169.19781:36 210.08589:17 221.1378:67 243.15086:38 257.24588:34 301.2742:39 398.74979:11 454.82068:41 474.34375:37 491.37457:486	2848.94	2782.98	2538.3	2359.57	1659.57	2344.64	3271.43	1844.64	1625	1394.64	1436	2317	1115	876	1102	2437.69	2096.18
209	4.745	491.876	491.87619_4.745	Unknown	[M+H]+		0.067	False	null	null	null	null	null	null	999	False	False	False		False	False	null	null	null	null	null	null	null	106.56	Lipidomics_pos_CON_02	491.87619:1198 492.87954:133 493.8829:0		1604.26	1600	1570.21	1219.15	974.468	1185.71	1694.64	875	942.857	789.286	612	1198	643	504	699	1393.91	1097.28
210	10.655	492.403	492.40311_10.655	w/o MS2:Cer 12:1;3O/18:2;(2OH)	[M+H]+		0.067	True	7.05	492.405	C30H55NO5	Cer_AP	WQIIODAILHYFIB-UHFFFAOYSA-N	O=C(NC(CO)C(O)C(O)CCCC=CCCC)C(O)CCCCCCC=CCC=CCCCCC	530	True	True	False		False	False	null	null	98.7	99.9	null	null	null	22	Lipidomics_pos_AH_04	492.40311:1269 493.40646:467 494.40982:270	89.05798:57 141.16335:146 225.25995:25 419.37421:18 492.40244:179	1548.94	2123.4	1770.21	2700	2597.87	1676.79	1855.36	1641.07	1225	1944.64	483	519	521	536	745	2148.27	1668.93
211	12.141	492.477	492.47739_12.141	Cer 32:1;2O|Cer 18:1;2O/14:0	[M+H-H2O]+	similar chromatogram in higher mz_1054	0.8	True	8.95	492.478	C32H63NO3	Cer_NS	ZKRPGPZHULJLKJ-UHFFFAOYSA-N	O=C(NC(CO)C(O)C=CCCCCCCCCCCCCC)CCCCCCCCCCCCC	410	True	True	True		False	False	null	null	100	99.9	41.8	58.1	100	24.47	Lipidomics_pos_CON_05	492.47491:1024 493.47826:811 494.48162:239	69.06928:50 236.23692:703 252.26562:160 254.24773:158 264.26855:226 282.2756:137 474.45782:54 492.29965:55 492.45212:53 492.47882:667	2325.53	2589.36	2097.87	2580.85	2593.62	2300	2757.14	2103.57	2557.14	2466.07	1144	1031	911	815	1024	2437.71	2436.94
212	9.704	493.35	493.34955_9.704	w/o MS2:TG 8:0_8:0_8:0	[M+Na]+	adduct linked to 207_[M+NH4]+	0.067	True	7.49	493.35	C27H50O6	TG	VLPFTAMPNXLGLX-UHFFFAOYSA-N	O=C(OCC(OC(=O)CCCCCCC)COC(=O)CCCCCCC)CCCCCCC	530	True	True	False		False	False	null	null	76.1	100	null	null	null	18.02	Lipidomics_pos_AH_01	493.34955:1081 494.3529:428 495.35626:73	132.90472:39 327.25348:211 493.34882:1124	2300	334.043	291.489	402.128	302.128	257.143	1767.86	398.214	201.786	298.214	192	227	197	251	209	726.197	584.844
213	2.406	494.323	494.32315_2.406	LPC 16:1	[M+H]+		0.933	True	5.86	494.324	C24H48NO7P	LPC	LFUDDCMNKWEORN-UHFFFAOYSA-N	O=C(OCC(O)COP(=O)([O-])OCC[N+](C)(C)C)CCCCCCCC=CCCCCCC	410	True	True	True		False	False	null	null	100	99.9	90.9	90.9	100	37.97	Lipidomics_pos_CON_05	494.32401:2372 495.32736:661 496.33072:233	184.07332:3806 476.31241:178 494.32431:1738	3974.47	4600	4436.17	4661.7	3619.15	2892.86	2950	3289.29	3080.36	2898.21	2847	2673	2345	2626	2372	4258.3	3022.01
214	13.403	495.264	495.26367_13.403	w/o MS2:RIKEN P-VS1 ID-4168 from Cell_C2C12_WT_N_4h50AA	[M+H]+	found in higher mz's MsMs_614; similar chromatogram in higher mz_753; similar chromatogram in higher mz_751; similar chromatogram in higher mz_1634; similar chromatogram in higher mz_474; similar chromatogram in higher mz_873; similar chromatogram in higher mz_301; found in higher mz's MsMs_301; similar chromatogram in higher mz_721; similar chromatogram in higher mz_815; similar chromatogram in …	1	True	7.48	495.268		Unknown			530	True	True	False		False	False	null	null	89.4	99.8	null	null	null	36.4	Lipidomics_pos_BL_05	495.26367:3500 496.26702:1400 497.27038:0	327.07693:618 439.20013:1091	4051.06	3846.81	3589.36	3419.15	3425.53	3094.64	2816.07	5226.79	5964.29	6250	2065	1167	1400	1681	1619	3666.38	4670.65
215	17.929	495.439	495.43869_17.929	Unknown	[M+H]+	similar chromatogram in higher mz_243	0.2	True	null	null	null	null	null	null	999	False	False	False		False	False	null	null	null	null	null	null	null	20.83	Lipidomics_pos_AH_02	495.43799:1813 496.44134:707 497.4447:157	69.07063:22 81.06979:60 95.08538:74 202.21758:9 383.13568:14 495.43732:863	2327.66	3857.45	1961.7	3885.11	3448.94	1332.14	1566.07	1780.36	1958.93	1719.64	1176	1327	1061	905	982	3096.28	1671.54
216	2.292	496.303	496.30283_2.292	PC 15:0	[M+H]+		1	True	4.34	496.303	C23H46NO8P	PC	SZYZJFKAMAOUBS-UHFFFAOYSA-N	O=C(OCC(OC(=O)CCCCCCCC)COP(=O)([O-])OCC[N+](C)(C)C)CCCCC	420	True	True	True		False	False	null	null	88.2	100	88	72	83.3	52.47	Lipidomics_pos_BL_02	496.30322:3103 497.30657:967 498.30993:199	109.10026:25 184.0737:5408 479.39697:33 496.30527:1521	9063.83	8825.53	8868.09	10872.3	9848.94	5435.71	5541.07	5028.57	4439.29	6212.5	4698	4262	5490	4563	4058	9495.72	5331.56
217	3.256	496.339	496.33945_3.256	LPC 16:0	[M+H]+	adduct linked to 235_[M+Na]+	1	True	6.21	496.34	C24H50NO7P	LPC	ASWBNKHCZGQVJV-UHFFFAOYSA-N	O=C(OCC(O)COP(=O)([O-])OCC[N+](C)(C)C)CCCCCCCCCCCCCCC	410	True	True	True		False	False	null	null	100	100	81.4	81.4	100	279.39	Lipidomics_pos_BL_01	496.33939:30764 497.34274:8100 498.3461:1388	184.07355:2059 478.30466:24 496.33987:1966	26744.7	27829.8	21648.9	23712.8	21731.9	54935.7	57401.8	54996.4	52107.1	52928.6	23287	24382	24186	21310	24452	24333.6	54473.9
218	3.012	496.34	496.33972_3.012	LPC 16:0	[M+H]+		0.933	True	6.21	496.34	C24H50NO7P	LPC	ASWBNKHCZGQVJV-UHFFFAOYSA-N	O=C(OCC(O)COP(=O)([O-])OCC[N+](C)(C)C)CCCCCCCCCCCCCCC	410	True	True	True		False	False	null	null	100	99.9	93.4	83.2	100	67.52	Lipidomics_pos_AH_05	496.33902:3195 497.34237:971 498.34573:205	85.10098:17 184.07349:5311 258.10825:43 478.29401:19 496.18475:40 496.33981:1530	6878.72	8663.83	7612.77	8621.28	6797.87	11392.9	11823.2	11739.3	11500	11137.5	4878	5384	5239	5160	4868	7714.76	11518.6
219	5.297	496.419	496.4194_5.297	w/o MS2:Cer 12:1;2O/21:5	[M+H]+		0.2	True	8.04	496.415	C33H55NO3	Cer_NS	MQNKKUKNETVCRN-UHFFFAOYSA-N	O=C(NC(CO)C(O)C=CCCCCCCC)CCCCC=CCC=CCC=CCC=CCC=CCC	530	True	True	False		False	False	null	null	90.3	100	null	null	null	16.58	Lipidomics_pos_CON_02	496.4194:1546 497.42275:590 498.42611:97	71.08415:79 89.05969:321 99.04333:11 99.11546:30 125.13199:25 241.24858:21 479.39227:692 496.41907:515	1804.26	2214.89	2223.4	1938.3	1887.23	1478.57	2408.93	1866.07	1073.21	1428.57	1188	1546	1378	907	859	2013.35	1651.45
220	6.895	501.355	501.35544_6.895	DG 26:3	[M+Na]+		0.067	True	7.47	501.355	C29H50O5	DG	DOHXEAFCLNRFSL-UHFFFAOYSA-N	O=C(OCC(OC(=O)CCCCCCCC=CCC=CCC=CCC)CO)CCCCCCC	420	True	True	True		False	False	null	null	100	100	75	75	100	35.36	Lipidomics_pos_CON_02	501.35544:1422 502.35879:370 503.36215:247	397.27896:19 501.35519:2439	1876.6	2080.85	1510.64	1668.09	1172.34	1189.29	1816.07	1346.43	1096.43	1058.93	836	1422	809	616	676	1662.02	1301.23
221	2.497	502.292	502.2923_2.497	LPE 20:4	[M+H]+		1	True	5.83	502.293	C25H44NO7P	LPE	JPNPIRVRGLGTRE-UHFFFAOYSA-N	O=C(OCC(O)COP(=O)(O)OCCN)CCCCCCC=CCC=CCC=CCC=CCC	410	True	True	True		False	False	null	null	100	99.9	65.3	68.5	100	91.55	Lipidomics_pos_BL_02	502.2926:2881 503.29595:1285 504.29931:214	69.06853:95 83.08281:64 105.06774:73 117.06927:49 187.14835:66 199.14365:64 216.05888:172 361.2735:4249 484.27136:30 502.29007:601	8400	11108.5	9502.13	10017	8942.55	4860.71	5144.64	5107.14	5171.43	5992.86	5891	6263	5228	5619	5006	9594.04	5255.47
222	2.789	506.288	506.28781_2.789	Unknown	[M+H]+		0.4	True	null	null	null	null	null	null	999	False	False	False		False	False	null	null	null	null	null	null	null	43.76	Lipidomics_pos_CON_01	506.28745:1607 507.2908:378 508.29416:86	69.0685:17 91.05504:34 226.04701:53 365.2684:4247	1640.43	1806.38	1646.81	2095.74	2161.7	1676.79	1664.29	1692.86	1489.29	2078.57	1607	1625	1587	1507	1553	1870.59	1720.22
223	3.692	508.303	508.30304_3.692	PE 19:1	[M+H]+		1	True	5.69	508.303	C24H46NO8P	PE	SBOVJGWTBQTSGK-UHFFFAOYSA-N	O=C(OCC(OC(=O)CCCCCCCC=CCCC)COP(=O)(O)OCCN)CCCCC	420	True	True	True		False	False	null	null	91.8	100	74.6	71.9	100	175.12	Lipidomics_pos_BL_02	508.30295:5180 509.3063:1325 510.30966:234	93.06987:29 107.08638:16 130.16504:13 208.03957:9 265.24094:26 367.28406:4612 473.35858:7 508.30359:385	9763.83	10653.2	8802.13	12053.2	12300	9137.5	9250	9050	7742.86	10548.2	11659	10940	11894	11097	10963	10714.2	9145.83
224	5.448	508.375	508.37518_5.448	w/o MS2:Cer 12:1;2O/19:5	[M+H]+		0.533	True	7.33	508.376	C31H51NO3	Cer_NS	OFSBMBOLKXPXSU-UHFFFAOYSA-N	O=C(NC(CO)C(O)C=CCCCCCCC)CCC=CCC=CCC=CCC=CCC=CCC	530	True	True	False		False	False	null	null	99.6	100	null	null	null	36.88	Lipidomics_pos_CON_03	508.37518:2047 509.37853:627 510.38189:192	86.0963:119 166.06816:33 491.31754:13	2387.23	2770.21	2697.87	2651.06	2265.96	1328.57	1464.29	1482.14	1401.79	1248.21	1865	1950	2047	1796	1882	2554.41	1384.84
225	8.582	508.456	508.45587_8.582	Unknown	[M+H]+		0.933	True	null	null	null	null	null	null	999	False	False	False		False	False	null	null	null	null	null	null	null	24.54	Lipidomics_pos_AH_03	508.45636:1576 509.45971:588 510.46307:204	71.08541:79 85.10088:80 133.08487:62 241.17754:33 241.25417:47 435.36646:67 508.40964:148	3706.38	3955.32	3353.19	3553.19	2780.85	2876.79	3567.86	2580.36	2387.5	2248.21	1755	2693	1637	1465	1461	3470.13	2732.1
226	9.71	509.323	509.32333_9.71	Unknown	[M+H]+	ion correlated with 207	0.133	True	null	null	null	null	null	null	999	False	False	False		False	False	null	null	null	null	null	null	null	65.86	Lipidomics_pos_AH_01	509.32333:4428 510.32668:1661 511.33004:644	123.11523:11 227.19873:22 509.32663:111	9421.28	1331.91	1117.02	1448.94	1146.81	944.643	6851.79	1012.5	744.643	964.286	624	830	657	940	551	2893.22	2103.24
227	2.703	510.318	510.31787_2.703	w/o MS2:PC 10:0_6:0	[M+H]+		0.4	True	5.05	510.319	C24H48NO8P	PC	KIESGXAQKKZYJJ-UHFFFAOYSA-N	O=C(OCC(OC(=O)CCCCC)COP(=O)([O-])OCC[N+](C)(C)C)CCCCCCCCC	530	True	True	False		False	False	null	null	99.4	100	null	null	null	31.96	Lipidomics_pos_AH_04	510.31787:1848 511.32122:536 512.32458:102	132.90495:55 510.3201:1514	3189.36	3410.64	3282.98	3931.91	3489.36	1251.79	1208.93	1157.14	950	1264.29	877	855	1032	888	773	3460.98	1166.63
228	3.589	512.416	512.41559_3.589	w/o MS2:Cer 13:1;2O/20:5;O	[M+H]+		1	True	7.52	512.41	C33H55NO4	Cer_HS	OZFFBHSBJLANES-UHFFFAOYSA-N	O=C(NC(CO)C(O)C=CCCCCCCCC)C(O)CCC=CCC=CCC=CCC=CCC=CCC	530	True	True	False		False	False	null	null	85.2	99.9	null	null	null	41.64	Lipidomics_pos_CON_02	512.41559:4802 513.41894:1526 514.4223:328	87.04308:27 301.27722:31 451.35706:18	5289.36	7393.62	6551.06	5740.43	4957.45	3969.64	7287.5	5373.21	3546.43	3610.71	3021	4802	3907	2809	2455	5986.12	4757.83
229	4.615	513.387	513.38702_4.615	Unknown	[M+H]+	similar chromatogram in higher mz_230; similar chromatogram in higher mz_2109	0.4	True	null	null	null	null	null	null	999	False	False	False		False	False	null	null	null	null	null	null	null	18.93	Lipidomics_pos_AH_01	513.38727:1074 514.39062:296 515.39398:0	85.10115:83 89.05912:363 101.09617:103 113.13177:8 127.14813:21 130.15955:74 169.19627:8 221.1367:73 257.24619:46 407.33557:9 476.84631:23 513.38788:542	2285.11	2172.34	2125.53	1791.49	1663.83	1748.21	2764.29	1416.07	1417.86	1292.86	1184	1979	874	772	1049	2007.5	1727.97
230	4.62	513.889	513.88861_4.62	Unknown	[M+H]+		0.067	False	null	null	null	null	null	null	999	False	False	False		False	False	null	null	null	null	null	null	null	111.05	Lipidomics_pos_CON_02	513.88861:1109 514.89196:77 515.89532:0		1397.87	1161.7	1329.79	940.426	840.426	1212.5	1298.21	816.071	714.286	673.214	578	1109	490	431	557	1134.26	942.857
231	13.388	515.412	515.41199_13.388	Unknown	[M+H]+	similar chromatogram in higher mz_524	0.067	True	null	null	null	null	null	null	999	False	False	False		False	False	null	null	null	null	null	null	null	25.52	Lipidomics_pos_AH_04	515.41199:1038 516.41534:425 517.4187:182	89.00432:226 115.02091:71 143.01669:443 329.21088:196 515.26917:54 515.31134:73 515.4093:200	1582.98	1361.7	891.489	2208.51	1404.26	546.429	673.214	292.857	335.714	607.143	548	368	505	394	289	1490.4	491.205
232	11.041	516.425	516.42542_11.041	w/o MS2:TG 8:0_8:0_10:0	[M+NH4]+	ion correlated with 274; adduct linked to 242_[M+Na]+; similar chromatogram in higher mz_274	0.733	True	8.26	516.426	C29H54O6	TG	OXBFEJBBKCRANO-UHFFFAOYSA-N	O=C(OCC(OC(=O)CCCCCCC)COC(=O)CCCCCCCCC)CCCCCCC	530	True	True	False		False	False	null	null	99.9	100	null	null	null	40.81	Lipidomics_pos_AH_01	516.42542:4817 517.42877:1923 518.43213:301	71.08455:25 132.90459:230 327.25256:536	10248.9	2944.68	2425.53	3000	2623.4	2157.14	7910.71	2132.14	1891.07	2433.93	1321	1632	1560	1610	1434	4248.64	3305.16
233	5.657	518.224	518.22363_5.657	Unknown	[M+H]+		0.8	True	null	null	null	null	null	null	999	False	False	False		False	False	null	null	null	null	null	null	null	23.23	Lipidomics_pos_AH_02	518.22382:2229 519.22717:661 520.23053:66	105.07187:22 483.36819:46	3202.13	4742.55	1406.38	3161.7	2751.06	1778.57	2530.36	3921.43	2841.07	2398.21	3559	2895	1789	2023	1344	3052.71	2694.13
234	6.049	518.224	518.22363_6.049	Unknown	[M+H]+		0.733	True	null	null	null	null	null	null	999	False	False	False		False	False	null	null	null	null	null	null	null	21.47	Lipidomics_pos_AH_01	518.22278:1956 519.22613:778 520.22949:131	159.10027:8 313.27054:21 483.36588:21 518.35284:112	4161.7	3906.38	2157.45	1710.64	3240.43	967.857	3376.79	3330.36	2232.14	1651.79	3287	3143	1372	1507	1187	3035.48	2311.92
235	3.25	518.321	518.32068_3.25	LPC 16:0	[M+Na]+	adduct linked to 217_[M+H]+	0.667	True	6.21	518.322	C24H50NO7P	LPC	ASWBNKHCZGQVJV-UHFFFAOYSA-N	O=C(OCC(O)COP(=O)([O-])OCC[N+](C)(C)C)CCCCCCCCCCCCCCC	410	True	True	True		False	False	null	null	100	100	99.9	90.2	100	17.2	Lipidomics_pos_BL_01	518.32068:1759 519.32403:594 520.32739:194	459.24808:888 518.2984:153	1770.21	1657.45	1125.53	1465.96	1227.66	3141.07	2835.71	3128.57	2735.71	2919.64	1483	1416	1488	1382	1312	1449.2	2951.85
236	12.259	518.493	518.49286_12.259	Cer 34:2;2O|Cer 18:2;2O/16:0	[M+H-H2O]+	adduct linked to 270_[M+H]+; found in higher mz's MsMs_270	1	True	8.95	518.493	C34H65NO3	Cer_NS	GMWIWVUTMCBDSP-UHFFFAOYSA-N	O=C(NC(CO)C(O)C=CCCC=CCCCCCCCCC)CCCCCCCCCCCCCCC	410	True	True	True		False	False	null	null	100	99.9	98.7	62.1	100	22.96	Lipidomics_pos_CON_03	518.49091:1445 519.49426:767 520.49762:203	250.26514:122 262.25211:1237	3074.47	3087.23	3082.98	3178.72	3095.74	2094.64	2476.79	2169.64	2401.79	2287.5	1806	1360	1445	1784	1709	3103.72	2286.25
237	2.468	520.339	520.33856_2.468	w/o MS2:LPC 18:2	[M+H]+		0.133	True	5.97	520.34	C26H50NO7P	LPC	SPJFYYJXNPEZDW-UHFFFAOYSA-N	O=C(OCC(O)COP(=O)([O-])OCC[N+](C)(C)C)CCCCCCCC=CCC=CCCCCC	530	True	True	False		False	False	null	null	99.3	99.9	null	null	null	24.97	Lipidomics_pos_AH_03	520.33856:1949 521.34191:735 522.34527:0	89.05923:98 502.32498:157	3736.17	4336.17	4146.81	4334.04	3678.72	1751.79	1851.79	3348.21	1801.79	1862.5	1742	1185	1021	1226	1028	4046.25	2123.3
238	2.615	520.339	520.33929_2.615	LPC 18:2	[M+H]+		0.6	True	5.97	520.34	C26H50NO7P	LPC	SPJFYYJXNPEZDW-UHFFFAOYSA-N	O=C(OCC(O)COP(=O)([O-])OCC[N+](C)(C)C)CCCCCCCC=CCC=CCCCCC	410	True	True	True		False	False	null	null	100	99.9	77.6	67.1	100	24.75	Lipidomics_pos_BL_04	520.33917:1770 521.34252:747 522.34588:0	184.073:1320 347.2601:26 520.30176:93	3791.49	4546.81	3914.89	4417.02	3668.09	3101.79	3180.36	3348.21	3160.71	2766.07	1742	1732	1505	1275	1403	4067.66	3111.47
239	7.791	520.436	520.43616_7.791	w/o MS2:Cer 12:1;3O/20:2;(2OH)	[M+H]+		0.933	True	7.59	520.436	C32H59NO5	Cer_AP	HLMZNLJKOZPWGH-UHFFFAOYSA-N	O=C(NC(CO)C(O)C(O)CCCC=CCCC)C(O)CCCCCCCCC=CCC=CCCCCC	530	True	True	False		False	False	null	null	100	100	null	null	null	17.32	Lipidomics_pos_CON_05	520.43616:1406 521.43951:445 522.44287:178	130.15904:6192 459.27695:20	2825.53	2827.66	2525.53	2965.96	2517.02	2196.43	2241.07	2125	1819.64	2157.14	1243	1316	1274	1371	1406	2732.42	2108.04
240	12.127	520.507	520.50653_12.127	w/o MS2:Cer 12:0;2O/22:1	[M+H]+		0.2	True	9.35	520.509	C34H67NO3	Cer_NDS	SLFXWZCYXYBRDQ-UHFFFAOYSA-N	O=C(NC(CO)C(O)CCCCCCCCC)CCCCCCCCCCCC=CCCCCCCCC	530	True	True	False		False	False	null	null	97.7	100	null	null	null	17.27	Lipidomics_pos_CON_01	520.50653:1351 521.50988:459 522.51324:0	133.08549:100 264.26797:1692	1200	1389.36	1225.53	1282.98	1478.72	1585.71	1876.79	1689.29	1873.21	1348.21	1351	1187	1220	1061	945	1315.48	1674.4
241	13.224	520.508	520.50751_13.224	Cer 34:1;2O|Cer 18:1;2O/16:0	[M+H-H2O]+	adduct linked to 280_[M+H]+; adduct linked to 321_[M+H]+; similar chromatogram in higher mz_367; similar chromatogram in higher mz_630; found in higher mz's MsMs_389	1	True	9.38	520.509	C34H67NO3	Cer_NS	YDNKGFDKKRUKPY-UHFFFAOYSA-N	O=C(NC(CO)C(O)C=CCCCCCCCCCCCCC)CCCCCCCCCCCCCCC	410	True	True	True		False	False	null	null	100	99.9	98	62.4	100	367.1	Lipidomics_pos_BL_05	520.50751:23740 521.51086:11583 522.51422:2383	175.12869:51 252.26778:321 264.26794:2890	44434	46604.3	44997.9	49395.7	47431.9	38230.4	41100	41258.9	41580.4	42392.9	26728	25705	24488	26430	24340	46572.8	40912.7
242	11.037	521.38	521.37976_11.037	w/o MS2:TG 8:0_8:0_10:0	[M+Na]+	adduct linked to 232_[M+NH4]+	0.133	True	8.26	521.381	C29H54O6	TG	OXBFEJBBKCRANO-UHFFFAOYSA-N	O=C(OCC(OC(=O)CCCCCCC)COC(=O)CCCCCCCCC)CCCCCCC	530	True	True	False		False	False	null	null	98.9	100	null	null	null	26.9	Lipidomics_pos_BL_02	521.37976:1429 522.38311:481 523.38647:157	327.2532:74 355.28226:206 521.38025:3717	2993.62	961.702	791.489	1000	908.511	796.429	2551.79	766.071	657.143	782.143	436	437	463	417	354	1331.3	1110.76
243	17.938	521.455	521.45483_17.938	Unknown	[M+H]+		0.067	True	null	null	null	null	null	null	999	False	False	False		False	False	null	null	null	null	null	null	null	25.38	Lipidomics_pos_AH_04	521.45483:1633 522.45818:587 523.46154:2846	71.08449:101 93.0697:35 175.13408:17 265.2532:28 349.24023:52 521.45508:1438	2540.43	2802.13	1651.06	3474.47	3008.51	1271.43	1642.86	1632.14	1367.86	1442.86	1187	1325	919	799	853	2695.13	1471.36
244	2.486	522.319	522.3186_2.486	w/o MS2:PE 6:0_14:1	[M+H]+		1	True	6.1	522.319	C25H48NO8P	PE	JNVXCWNLRFXCFW-UHFFFAOYSA-N	O=C(OCC(OC(=O)CCCCCCCC=CCCCC)COP(=O)(O)OCCN)CCCCC	530	True	True	False		False	False	null	null	99.9	99.9	null	null	null	204.53	Lipidomics_pos_AH_04	522.3186:13646 523.32195:4161 524.32531:804	124.99877:55 286.10046:77	22868.1	24768.1	22314.9	29034	26570.2	7605.36	7703.57	7844.64	7700	8151.79	8829	8738	8778	8225	7872	25111.1	7801.07
245	3.439	522.355	522.35504_3.439	LPC 18:1	[M+H]+		1	True	6.27	522.355	C26H52NO7P	LPC	YAMUFBLWGFFICM-UHFFFAOYSA-N	O=C(OCC(O)COP(=O)([O-])OCC[N+](C)(C)C)CCCCCCCC=CCCCCCCCC	410	True	True	True		False	False	null	null	100	100	81.1	85.3	100	299.63	Lipidomics_pos_CON_02	522.35486:15893 523.35821:4907 524.36157:924	86.09574:100 104.10624:298 184.07309:1019 339.2868:58 504.34406:189 504.36157:27 522.35382:1619	19617	23359.6	16300	18861.7	16104.3	20371.4	22817.9	25260.7	19660.7	21385.7	17855	15893	14091	13632	14545	18848.3	21899.3
246	3.202	522.355	522.3551_3.202	LPC 18:1	[M+H]+		0.933	True	6.27	522.355	C26H52NO7P	LPC	YAMUFBLWGFFICM-UHFFFAOYSA-N	O=C(OCC(O)COP(=O)([O-])OCC[N+](C)(C)C)CCCCCCCC=CCCCCCCCC	410	True	True	True		False	False	null	null	100	100	93.9	78.8	100	216.89	Lipidomics_pos_BL_03	522.35547:5013 523.35882:1803 524.36218:0	184.07367:4939 258.10818:27 522.3551:2171	16812.8	18940.4	18214.9	20274.5	16208.5	8750	8800	8951.79	8378.57	9569.64	11805	12743	9097	12539	11822	18090.7	8890.13
247	7.796	523.182	523.18158_7.796	Unknown	[M+H]+		1	True	null	null	null	null	null	null	999	False	False	False		False	False	null	null	null	null	null	null	null	143.01	Lipidomics_pos_AH_01	523.18109:8535 524.18444:3286 525.1878:450	132.90454:1163 132.97401:4 133.19948:4 133.27977:4 342.02094:9 430.08414:7 523.18079:5 523.23401:4 523.2514:4 523.38361:4	18159.6	14427.7	14036.2	13595.7	14012.8	12733.9	15641.1	10885.7	6350	10719.6	17654	12264	11913	13538	12756	14846.3	11265.8
248	6.569	523.3	523.29956_6.569	w/o MS2:RIKEN P-VS1 ID-4580 from Mouse_Feces_WT_N_Ctr	[M+H]+		0.733	True	1.32	523.304		Unknown			530	True	True	False		False	False	null	null	89.9	99.9	null	null	null	20.06	Lipidomics_pos_AH_04	523.29956:1295 524.30291:341 525.30627:188	117.05672:25 181.09798:20 207.11577:10 311.2919:10 523.29962:76	2555.32	2712.77	2346.81	2755.32	2195.74	1969.64	2050	1732.14	1766.07	1830.36	1038	967	974	1162	1134	2513.38	1869.53
249	18.359	523.47	523.4696_18.359	Unknown	[M+H]+	found in higher mz's MsMs_1480; similar chromatogram in higher mz_1986	1	True	null	null	null	null	null	null	999	False	False	False		False	False	null	null	null	null	null	null	null	31.93	Lipidomics_pos_AH_02	523.46991:4631 524.47326:2501 525.47662:406	523.46826:371	5931.91	9853.19	4746.81	10348.9	7989.36	4000	4096.43	4421.43	3932.14	4464.29	3942	3372	3145	2810	2714	7773.83	4182.92
250	17.957	523.47	523.46991_17.957	Unknown	[M+H]+		0.133	True	null	null	null	null	null	null	999	False	False	False		False	False	null	null	null	null	null	null	null	26.89	Lipidomics_pos_AH_04	523.47003:2267 524.47338:852 525.47674:179	523.46997:2972	3787.23	4440.43	3155.32	4823.4	5691.49	2257.14	2614.29	2983.93	2450	2764.29	1992	1671	1557	1451	1532	4380.03	2613.62
251	13.829	523.47	523.47009_13.829	Unknown	[M+H-H2O]+	adduct linked to 318_[M+NH4]+	0.733	True	null	null	null	null	null	null	999	False	False	False		False	False	null	null	null	null	null	null	null	20.28	Lipidomics_pos_AH_04	523.47015:1528 524.4735:563 525.47686:373	211.20584:83 239.23648:203	2182.98	2602.13	2389.36	3251.06	3089.36	2364.29	2657.14	2542.86	2194.64	2607.14	2045	2305	1918	1583	1844	2702.82	2472.75
252	3.266	524.334	524.33429_3.266	PC 17:0	[M+H]+		1	True	5.65	524.335	C25H50NO8P	PC	IDGLRVSEXOFVDA-UHFFFAOYSA-N	O=C(OCC(OC(=O)CCCCC)COP(=O)([O-])OCC[N+](C)(C)C)CCCCCCCCCC	420	True	True	True		False	False	null	null	88.1	100	87.9	71.8	83.3	270.35	Lipidomics_pos_BL_01	524.33447:13984 525.33782:3910 526.34118:619	184.07309:3251 524.33795:1093	28059.6	28202.1	28063.8	32419.1	31193.6	24971.4	24832.1	24300	21719.6	26039.3	13356	13632	14596	13309	12566	29587.7	24372.3
253	4.371	524.37	524.37_4.371	LPC 18:0	[M+H]+		0.067	True	6.73	524.371	C26H54NO7P	LPC	IHNKQIMGVNPMTC-UHFFFAOYSA-N	O=C(OCC(O)COP(=O)([O-])OCC[N+](C)(C)C)CCCCCCCCCCCCCCCCC	410	True	True	True		False	False	null	null	96.5	100	94	36.8	100	37.6	Lipidomics_pos_BL_03	524.37:1729 525.37335:575 526.37671:111	184.07281:3150 524.28644:22	1963.83	2280.85	1459.57	2008.51	1606.38	2589.29	2594.64	3087.5	2339.29	2153.57	1331	1114	996	864	1029	1863.62	2552.88
254	4.759	524.371	524.37085_4.759	LPC 18:0	[M+H]+		1	True	6.73	524.371	C26H54NO7P	LPC	IHNKQIMGVNPMTC-UHFFFAOYSA-N	O=C(OCC(O)COP(=O)([O-])OCC[N+](C)(C)C)CCCCCCCCCCCCCCCCC	410	True	True	True		False	False	null	null	100	100	89.1	76.1	100	202.2	Lipidomics_pos_CON_04	524.37097:11279 525.37432:3244 526.37768:595	184.07314:755 341.30432:27 524.37091:652	20944.7	20572.3	13440.4	18746.8	15255.3	28558.9	27016.1	27216.1	23237.5	24667.9	13146	12558	14159	11279	12508	17792	26139.3
255	6.593	524.451	524.45129_6.593	w/o MS2:Cer 13:0;2O/22:6	[M+H]+		1	True	8.24	524.446	C35H59NO3	Cer_NDS	VDTPCJIRLHKGCG-UHFFFAOYSA-N	O=C(NC(CO)C(O)CCCCCCCCCC)CCC=CCC=CCC=CCC=CCC=CCC=CCC	530	True	True	False		False	False	null	null	89	100	null	null	null	178.17	Lipidomics_pos_CON_02	524.45129:30613 525.45464:13639 526.458:2302	85.10084:99 127.14585:13 145.12242:182 251.18782:24 451.36179:51 524.45129:1505	39863.8	38444.7	33008.5	34102.1	21193.6	27107.1	39782.1	23908.9	22596.4	19653.6	18185	30613	15766	12289	12725	33322.3	26609.7
256	2.355	526.293	526.29303_2.355	LPE 22:6	[M+H]+		1	True	5.69	526.293	C27H44NO7P	LPE	XEVRBOQZSXWGQO-UHFFFAOYSA-N	O=C(OCC(O)COP(=O)(O)OCCN)CCC=CCC=CCC=CCC=CCC=CCC=CCC	410	True	True	True		False	False	null	null	100	99.9	72.8	75	100	42.65	Lipidomics_pos_CON_03	526.29254:2243 527.29589:576 528.29925:240	89.05839:30 98.98507:12 115.05686:12 131.08488:67 143.08337:32 159.07504:16 181.10043:13 199.14693:39 227.19836:13 354.27817:58 385.27481:5102 508.2807:59 526.25293:55	2461.7	3346.81	2680.85	3229.79	2672.34	2282.14	2596.43	2739.29	2641.07	3014.29	2518	2684	2243	2407	2323	2878.48	2654.49
257	2.178	528.272	528.27167_2.178	Unknown	[M+H]+		0.333	True	null	null	null	null	null	null	999	False	False	False		False	False	null	null	null	null	null	null	null	59.9	Lipidomics_pos_AH_04	528.26953:1131 529.27288:269 530.27624:235	79.05206:82 119.08548:138 142.02847:25 159.11525:79 370.15958:43 528.23016:36 528.27191:249	1938.3	2053.19	1780.85	2406.38	2206.38	1401.79	1739.29	1616.07	1637.5	1721.43	1277	1243	1402	1328	1173	2077.1	1623.37
258	2.593	528.308	528.30756_2.593	LPE 22:5	[M+H]+		0.267	True	6.01	528.308	C27H46NO7P	LPE	OSRWIBSZJTWIKA-UHFFFAOYSA-N	O=C(OCC(O)COP(=O)(O)OCCN)CCCCCC=CCC=CCC=CCC=CCC=CCC	410	True	True	True		False	False	null	null	100	99.9	72.7	74	100	51.49	Lipidomics_pos_AH_05	528.30768:1157 529.31103:359 530.31439:0	81.06959:59 130.15813:51 198.05196:60 387.28885:1869	2231.91	3063.83	2593.62	2868.09	2461.7	1226.79	1330.36	1198.21	1342.86	1296.43	1064	1070	899	888	816	2643.78	1278.88
259	2.656	530.288	530.28754_2.656	PE 21:4	[M+H]+	adduct linked to 307_[M+Na]+	1	True	5.24	530.288	C26H44NO8P	PE	BDHGEVAGRLCJCP-UHFFFAOYSA-N	O=C(OCC(OC(=O)CC=CCC=CCC=CCC=CCC)COP(=O)(O)OCCN)CCCCC	420	True	True	True		False	False	null	null	89.6	100	66	65	100	660.52	Lipidomics_pos_BL_05	530.28741:16809 531.29076:5759 532.29412:1023	79.05351:95 95.08549:102 131.08476:68 143.0836:26 157.03458:22 201.16353:78 215.17937:48 241.19411:39 251.12794:38 389.2673:4138 530.28851:1288	50478.7	58723.4	46661.7	66106.4	64423.4	23337.5	26907.1	25816.1	23578.6	30016.1	28029	29327	27958	26712	26756	57278.8	25930.8
260	3.266	530.324	530.32391_3.266	LPE 22:4	[M+H]+		0.933	True	6.32	530.324	C27H48NO7P	LPE	RSVFMXVZJZRSQQ-UHFFFAOYSA-N	O=C(OCC(O)COP(=O)(O)OCCN)CCCCCCCCC=CCC=CCC=CCC=CCC	410	True	True	True		False	False	null	null	100	100	66.1	68.2	100	47.65	Lipidomics_pos_AH_01	530.32391:2309 531.32726:876 532.33062:224	79.05448:69 145.1033:81 163.14799:60 216.06248:50 358.30896:152 389.30435:5452 530.32056:811	4912.77	6506.38	5417.02	6023.4	5302.13	2058.93	2625	2478.57	2617.86	2658.93	2010	2034	1621	1675	1637	5632.58	2487.75
261	11.058	531.408	531.40802_11.058	DG 28:2	[M+Na]+	similar chromatogram in higher mz_345	0.867	True	8.49	531.402	C31H56O5	DG	ROHANZJEYWIHHE-UHFFFAOYSA-N	O=C(OCC(OC(=O)CCCCCCCCCC=CCC=CCCCCC)CO)CCCCCCC	420	True	True	True		False	False	null	null	100	100	65.1	75	100	31.82	Lipidomics_pos_AH_03	531.40582:1848 532.40917:890 533.41253:236	85.10073:162 241.21735:54 273.1767:65 273.18695:232 531.4046:1342	3976.6	6144.68	3931.91	4757.45	4465.96	1887.5	3367.86	2337.5	2053.57	3642.86	3526	1400	2330	1789	1254	4655.11	2658.17
262	14.508	531.475	531.4751_14.508	Unknown	[M+H]+	adduct linked to 294_[M+NH4]+; adduct linked to 310_[M+Na]+	1	True	null	null	null	null	null	null	999	False	False	False		False	False	null	null	null	null	null	null	null	36.99	Lipidomics_pos_AH_01	531.47504:2550 532.47839:1198 533.48175:255	85.0997:17 104.99964:48 121.06408:17 147.08028:33 149.05875:395 273.18353:17 345.20685:18 419.35059:171 531.41333:178	5425.53	5142.55	5610.64	5578.72	6355.32	4571.43	4282.14	4525	4280.36	5328.57	2471	2312	2375	2397	2703	5622.71	4597.77
263	3.46	532.302	532.30243_3.46	PE 21:3	[M+H]+		0.333	True	5.76	532.303	C26H46NO8P	PE	LXENZMWNVBIGQF-UHFFFAOYSA-N	O=C(OCC(OC(=O)CCCCC=CCC=CCC=CCC)COP(=O)(O)OCCN)CCCCC	420	True	True	True		False	False	null	null	83	100	69.9	67.6	75	30.53	Lipidomics_pos_CON_05	532.30304:1673 533.30639:478 534.30975:406	79.05473:68 93.06892:67 142.0246:20 197.08006:17 244.0553:34 332.29425:91 391.28345:2166 452.4024:26	2080.85	2395.74	2010.64	2270.21	2325.53	1196.43	1242.86	1026.79	1094.64	1430.36	1926	1918	1900	1720	1673	2216.06	1198.35
264	3.121	532.303	532.30286_3.121	PE 21:3	[M+H]+		0.667	True	5.76	532.303	C26H46NO8P	PE	LXENZMWNVBIGQF-UHFFFAOYSA-N	O=C(OCC(OC(=O)CCCCC=CCC=CCC=CCC)COP(=O)(O)OCCN)CCCCC	420	True	True	True		False	False	null	null	90.6	100	69.2	68.6	100	51	Lipidomics_pos_BL_05	532.30353:1268 533.30688:389 534.31024:216	85.10183:22 147.11913:13 201.16299:32 271.24207:18 332.29218:65 391.28333:2023 532.3031:407	2744.68	2825.53	2223.4	3053.19	3004.26	1775	2032.14	2017.86	1560.71	2264.29	3303	3271	3202	2972	3050	2769.87	1929.8
265	17.343	533.529	533.5285_17.343	Unknown	[M+H]+		0.8	True	null	null	null	null	null	null	999	False	False	False		False	False	null	null	null	null	null	null	null	43.59	Lipidomics_pos_AH_02	533.5271:1440 534.53045:640 535.53381:197	71.0842:79 95.08588:62 111.11605:57 143.10625:30 149.13316:58 167.17146:17 177.16125:28 199.16238:28 219.20969:204 235.20438:48 237.22157:202 533.52881:386	2165.96	3063.83	2936.17	3208.51	3395.74	1823.21	2462.5	2603.57	1962.5	3023.21	1700	1758	1658	1365	1699	2953.91	2374.75
266	3.252	534.295	534.29541_3.252	Unknown	[M+H]+		0.467	True	null	null	null	null	null	null	999	False	False	False		False	False	null	null	null	null	null	null	null	28.05	Lipidomics_pos_BL_01	534.2951:1557 535.29845:366 536.30181:175	86.09704:104 437.36865:30 534.26105:75	1353.19	1278.72	1063.83	1134.04	1006.38	2780.36	2783.93	2678.57	2303.57	2555.36	1054	1202	1265	1034	1083	1166.99	2620.38
267	4.495	535.4	535.3999_4.495	w/o MS2:TG 9:0_9:0_9:0	[M+H]+		0.067	True	8.75	535.397	C30H56O6	TG	YRIMSXJXBHUHJT-UHFFFAOYSA-N	O=C(OCC(OC(=O)CCCCCCCC)COC(=O)CCCCCCCC)CCCCCCCC	530	True	True	False		False	False	null	null	74.9	99.9	null	null	null	21.79	Lipidomics_pos_CON_02	535.3999:1239 536.40325:241 537.40661:0	83.08432:49 87.04417:42 132.90379:37 145.12122:184 177.11105:94 221.13525:25 365.25244:11 434.2731:11 535.39954:1491	1940.43	1544.68	1593.62	1397.87	1085.11	1116.07	1657.14	837.5	1000	791.071	874	1239	649	749	931	1512.21	1080.38
268	12.473	536.164	536.16431_12.473	w/o MS2:RIKEN P-VS1 ID-4780 from Cell_C2C12_WT_N_4h50AA	[M+H]+		1	True	8.76	536.164		Unknown			530	True	True	False		False	False	null	null	100	99.9	null	null	null	46.39	Lipidomics_pos_CON_04	536.16431:2685 537.16766:1125 538.17102:782	265.01755:126 326.96475:324 519.13385:645	4985.11	4742.55	4785.11	5168.09	5593.62	4085.71	4001.79	4423.21	4082.14	4601.79	2310	2275	2486	2685	2525	5055.05	4239.02
269	2.863	536.334	536.33417_2.863	w/o MS2:PE 6:0_15:1	[M+H]+		0.067	True	6.37	536.335	C26H50NO8P	PE	HSLVQWLXTVVMSL-UHFFFAOYSA-N	O=C(OCC(OC(=O)CCCCCCCC=CCCCCC)COP(=O)(O)OCCN)CCCCC	530	True	True	False		False	False	null	null	99.9	99.9	null	null	null	22.48	Lipidomics_pos_AH_04	536.33417:1035 537.33752:325 538.34088:92	174.12801:27 265.021:11 353.26776:16 415.03403:53 536.33398:1293	1774.47	2059.57	1795.74	2202.13	2157.45	783.929	794.643	816.071	739.286	925	905	872	915	795	917	1997.74	812.121
270	12.257	536.501	536.50128_12.257	Cer 34:2;2O|Cer 18:2;2O/16:0	[M+H]+	adduct linked to 236_[M+H-H2O]+	0.667	True	8.95	536.504	C34H65NO3	Cer_NS	GMWIWVUTMCBDSP-UHFFFAOYSA-N	O=C(NC(CO)C(O)C=CCCC=CCCCCCCCCC)CCCCCCCCCCCCCCC	410	True	True	True		False	False	null	null	100	99.9	81.2	64.8	100	12.04	Lipidomics_pos_CON_05	536.50214:1312 537.50549:684 538.50885:0	174.12628:94 250.25427:262 262.25385:3286 500.47925:241 518.48859:2040	2553.19	2531.91	2104.26	2642.55	2302.13	1442.86	1564.29	1428.57	1817.86	2012.5	1474	919	1202	1177	1312	2426.73	1653.26
271	11.834	536.503	536.50305_11.834	Cer 34:1;3O|Cer 18:1;2O/16:0;O	[M+H-H2O]+	similar chromatogram in higher mz_1407; similar chromatogram in higher mz_888	0.333	True	9.07	536.504	C34H67NO4	Cer_HS	YWZGQPJRQXHVQX-UHFFFAOYSA-N	O=C(NC(CO)C(O)C=CCCCCCCCCCCCCC)C(O)CCCCCCCCCCCCCC	410	True	True	True		False	False	null	null	100	100	81.9	70.2	100	22.42	Lipidomics_pos_AH_01	536.50354:1738 537.50689:0 538.51025:0	247.23685:37 252.26854:133 282.27844:176 506.48959:99 536.50281:451	3697.87	3463.83	3604.26	4025.53	3555.32	778.571	798.214	366.071	792.857	353.571	465	573	164	358	0	3669.47	617.701
272	12.559	537.165	537.1651_12.559	Unknown	[M+H]+		0.067	False	null	null	null	null	null	null	999	False	False	False		False	False	null	null	null	null	null	null	null	35.01	Lipidomics_pos_CON_04	537.1651:1330 538.16845:646 539.17181:520		2974.47	2712.77	2774.47	2719.15	2744.68	2103.57	1453.57	2080.36	2058.93	1412.5	1459	1010	1278	1330	1320	2785.35	1821.23
273	11.182	537.354	537.35358_11.182	Unknown	[M+H]+		0.133	True	null	null	null	null	null	null	999	False	False	False		False	False	null	null	null	null	null	null	null	19.1	Lipidomics_pos_AH_04	537.35358:1305 538.35693:405 539.36029:198	264.27127:42 281.0495:92 504.11087:51 537.35474:1173	2446.81	2663.83	2631.91	2776.6	2585.11	2235.71	8073.21	2491.07	2239.29	1798.21	1129	1203	1193	1351	891	2620.4	3367.63
274	11.05	537.354	537.35437_11.05	Unknown	[M+H]+	ion correlated with 232	0.8	True	null	null	null	null	null	null	999	False	False	False		False	False	null	null	null	null	null	null	null	28.13	Lipidomics_pos_AH_01	537.35437:4540 538.35772:2112 539.36108:725	147.06421:17 175.13034:34 504.10904:27	9659.57	2865.96	2631.91	2751.06	2585.11	2235.71	8073.21	2491.07	2239.29	2676.79	1129	1203	1193	1351	872	4098.72	3543.17
275	18.552	537.486	537.48627_18.552	Unknown	[M+H]+		0.467	False	null	null	null	null	null	null	999	False	False	False		False	False	null	null	null	null	null	null	null	23.55	Lipidomics_pos_CON_03	537.48627:2488 538.48962:616 539.49298:171		4406.38	5104.26	4627.66	3997.87	5161.7	2760.71	3651.79	3437.5	3280.36	4110.71	2378	2349	2488	1711	2046	4659.63	3448.21
276	14.261	537.487	537.48651_14.261	Unknown	[M+H]+		0.067	True	null	null	null	null	null	null	999	False	False	False		False	False	null	null	null	null	null	null	null	14.59	Lipidomics_pos_CON_03	537.48651:1282 538.48986:351 539.49322:117	225.21751:49 537.16888:46 537.48804:1258	1600	2089.36	1787.23	2046.81	2236.17	1271.43	1958.93	1576.79	1387.5	1833.93	1178	1139	1282	751	1027	1951.38	1605.94
277	19.352	537.522	537.52173_19.352	Unknown	[M+H]+	ion correlated with 1678; found in higher mz's MsMs_1399	0.667	True	null	null	null	null	null	null	999	False	False	False		False	False	null	null	null	null	null	null	null	33.51	Lipidomics_pos_AH_01	537.52234:2367 538.52569:848 539.52905:273	71.08546:365 151.14893:26 225.26131:9 282.27673:43 477.4726:16 537.51813:2605	5036.17	5704.26	3334.04	6276.6	5634.04	758.929	1041.07	1100	957.143	1008.93	1805	1504	1924	1673	1587	5196.94	973.214
278	15.456	537.523	537.52307_15.456	Unknown	[M+H-H2O]+	ion correlated with 312; ion correlated with 1517; adduct linked to 370_[M+Na]+; adduct linked to 312_[M+H]+; similar chromatogram in higher mz_334	0.333	True	null	null	null	null	null	null	999	False	False	False		False	False	null	null	null	null	null	null	null	43.99	Lipidomics_pos_CON_01	537.52307:3265 538.52642:1802 539.52978:228	537.35413:44	357.447	380.851	342.553	440.426	397.872	848.214	987.5	735.714	778.571	1066.07	3265	2492	2702	2321	2385	383.723	883.214
279	13.736	537.535	537.53516_13.736	Unknown	[M+H]+		0.733	True	null	null	null	null	null	null	999	False	False	False		False	False	null	null	null	null	null	null	null	37.53	Lipidomics_pos_AH_01	537.53546:1342 538.53881:565 539.54217:137	174.12726:43 281.29526:336 282.27783:1095 537.35229:40	2855.32	2987.23	2631.91	2931.91	5395.74	2416.07	2121.43	3123.21	4283.93	3053.57	1035	1092	1052	1198	1078	3360.13	2999.93
280	13.224	538.518	538.51813_13.224	Cer 34:1;2O|Cer 18:1;2O/16:0	[M+H]+	adduct linked to 241_[M+H-H2O]+; found in higher mz's MsMs_389	1	True	9.38	538.519	C34H67NO3	Cer_NS	YDNKGFDKKRUKPY-UHFFFAOYSA-N	O=C(NC(CO)C(O)C=CCCCCCCCCCCCCC)CCCCCCCCCCCCCCC	410	True	True	True		False	False	null	null	100	99.9	97.3	75.4	100	345.51	Lipidomics_pos_BL_02	538.51855:15510 539.5219:7407 540.52526:1289	71.08477:190 121.10151:151 184.07198:102 247.24146:180 264.26892:23380 282.27808:3494 490.49911:441 502.49686:2486 538.51593:862	28723.4	30161.7	25540.4	31353.2	29768.1	23964.3	27696.4	25717.9	28096.4	26346.4	16357	14500	15256	14723	14568	29109.6	26364.6
281	5.161	540.447	540.44696_5.161	w/o MS2:Cer 12:2;2O/21:2	[M+H]+		0.2	True	8.5	540.439	C33H59NO3	Cer_NS	AOYSYBQBCQYZIP-UHFFFAOYSA-N	O=C(NC(CO)C(O)C=CCCC=CCCC)CCCCCCCCCC=CCC=CCCCCCC	530	True	True	False		False	False	null	null	63.8	99.9	null	null	null	14.89	Lipidomics_pos_CON_02	540.44696:1281 541.45031:454 542.45367:116	85.10133:46 112.09444:11 132.90463:27 177.09543:28 239.14935:19 265.16287:28 327.18451:30 373.32788:13 479.40283:26 523.41998:736 540.44739:996	1540.43	1891.49	2236.17	2000	1440.43	1332.14	2112.5	1678.57	1021.43	1217.86	1040	1281	1237	796	756	1821.7	1472.37
282	13.628	540.534	540.53369_13.628	Cer 34:0;2O|Cer 18:0;2O/16:0	[M+H]+		0.867	True	9.97	540.535	C34H69NO3	Cer_NDS	GCGTXOVNNFGTPQ-UHFFFAOYSA-N	O=C(NC(CO)C(O)CCCCCCCCCCCCCCC)CCCCCCCCCCCCCCC	410	True	True	True		False	False	null	null	97.9	99.9	42.6	33.9	100	87.03	Lipidomics_pos_BL_04	540.53369:9746 541.53704:5074 542.5404:653	70.06357:25 109.09998:25 254.28304:59 266.28207:334 504.51273:117 522.52252:2102	3759.57	3844.68	2846.81	3093.62	4587.23	15985.7	16253.6	17264.3	17403.6	15983.9	2309	2051	2124	2391	2481	3626.04	16578
283	12.564	540.534	540.534_12.564	w/o MS2:Cer 18:0;2O/16:0	[M+H]+	similar chromatogram in higher mz_932	0.2	True	9.97	540.535	C34H69NO3	Cer_NDS	GCGTXOVNNFGTPQ-UHFFFAOYSA-N	O=C(NC(CO)C(O)CCCCCCCCCCCCCCC)CCCCCCCCCCCCCCC	530	True	True	False		False	False	null	null	69.2	100	null	null	null	43.59	Lipidomics_pos_BL_01	540.534:1159 541.53735:324 542.54071:0	95.08432:27 227.20464:51 266.28537:183 284.2821:209 507.11096:48 540.49695:105	63.8298	110.638	180.851	153.191	0	2069.64	1857.14	1660.71	1766.07	1816.07	94	46	0	25	106	102.261	1833.84
284	1.666	543.306	543.30609_1.666	Unknown	[M+H]+		0.867	True	null	null	null	null	null	null	999	False	False	False		False	False	null	null	null	null	null	null	null	39.8	Lipidomics_pos_AH_02	543.30743:1069 544.31078:601 545.31414:258	129.10252:4638 437.19077:131 543.26996:121 543.29309:54 543.3078:242	2163.83	2274.47	2148.94	2455.32	2336.17	2378.57	1828.57	2167.86	2267.86	2239.29	1605	1073	1058	1101	1010	2275.82	2176.14
285	2.444	544.34	544.3396_2.444	LPC 20:4	[M+H]+		1	True	5.86	544.34	C28H50NO7P	LPC	GOMVPVRDBLLHQC-UHFFFAOYSA-N	O=C(OCC(O)COP(=O)([O-])OCC[N+](C)(C)C)CCCCCCC=CCC=CCC=CCC=CCC	410	True	True	True		False	False	null	null	100	99.9	63	64.7	100	98.81	Lipidomics_pos_CON_02	544.3382:2352 545.34155:750 546.34491:168	71.07378:27 184.05692:92 439.21835:56 526.32819:121 544.33624:1644	12789.4	18540.4	15840.4	17080.9	13427.7	3898.21	4158.93	4503.57	3814.29	3464.29	2545	2352	2229	1798	2105	15535.6	3967.72
286	1.667	544.363	544.36292_1.667	w/o MS2:SL 12:1;O/17:2;O	[M+H]+		1	True	6.75	544.367	C29H53NO6S	SL	HOLWETYIDWWWPW-UHFFFAOYSA-N	O=C(N(CC(O)C=CCCCCCCC)CS(=O)(=O)O)C(O)CCCCCCC=CCC=CCCCC	530	True	True	False		False	False	null	null	94.5	99.9	null	null	null	108.73	Lipidomics_pos_CON_01	544.36292:6772 545.36627:3007 546.36963:670	111.08885:42 130.15952:10266 544.3186:69	7917.02	7487.23	7857.45	7327.66	7823.4	7767.86	7614.29	7416.07	6944.64	6976.79	6772	4899	4401	4294	4129	7682.39	7343.71
287	12.415	544.455	544.45532_12.415	w/o MS2:TG 8:0_8:0_12:0	[M+H]+		0.2	True	8.76	544.457	C31H58O6	TG	DSRUPIUWBWOXGJ-UHFFFAOYSA-N	O=C(OCC(OC(=O)CCCCCCC)COC(=O)CCCCCCCCCCC)CCCCCCC	530	True	True	False		False	False	null	null	98.5	99.9	null	null	null	35.13	Lipidomics_pos_AH_02	544.45532:2498 545.45867:873 546.46203:213	71.08677:92 155.14124:55 253.21138:32 271.18921:339 299.22086:1463 439.37708:732 544.35358:50	2419.15	5314.89	1948.94	5012.77	3129.79	1910.71	2241.07	2185.71	1926.79	2028.57	1429	1194	1018	866	1206	3565.05	2058.71
288	12.221	544.455	544.45532_12.221	w/o MS2:TG 9:0_9:0_10:0	[M+H]+		0.333	True	9.02	544.457	C31H58O6	TG	BFQBCGHWXPZHLR-UHFFFAOYSA-N	O=C(OCC(OC(=O)CCCCCCCC)COC(=O)CCCCCCCCC)CCCCCCCC	530	True	True	False		False	False	null	null	64.8	99.9	null	null	null	37.56	Lipidomics_pos_BL_02	544.45532:2430 545.45867:1706 546.46203:535	95.08524:156 355.25171:133 544.43585:322	5129.79	3472.34	2257.45	3442.55	2897.87	2300	4339.29	2335.71	2108.93	2903.57	1402	1361	1098	1302	1167	3440.16	2797.54
289	6.584	545.381	545.38055_6.584	Unknown	[M+H]+		0.067	True	null	null	null	null	null	null	999	False	False	False		False	False	null	null	null	null	null	null	null	28.01	Lipidomics_pos_CON_02	545.38055:1376 546.3839:551 547.38726:236	132.90332:42 545.284:71	1714.89	1608.51	1542.55	1455.32	987.234	1158.93	1710.71	983.929	975	1001.79	758	1376	670	555	628	1461.84	1165.6
290	1.667	547.109	547.10858_1.667	Unknown	[M+H]+		1	True	null	null	null	null	null	null	999	False	False	False		False	False	null	null	null	null	null	null	null	492.8	Lipidomics_pos_AH_01	547.10876:8167 548.11211:3910 549.11547:470	547.0661:50	17376.6	12102.1	9306.38	5791.49	8178.72	15660.7	24744.6	12908.9	10028.6	13325	25244	13381	11349	13412	9414	10551	15333.9
291	1.925	547.335	547.3349_1.925	DG 30:8	[M+Na]+	similar chromatogram in higher mz_2151	0.267	True	6.84	547.339	C33H48O5	DG	STFVPFUQNLVYNE-UHFFFAOYSA-N	O=C(OCC(OC(=O)CC=CCC=CCC=CCC=CCC)CO)CC=CCC=CCC=CCC=CCC	420	True	True	True		False	False	null	null	100	99.9	42.6	75	100	17.17	Lipidomics_pos_AH_01	547.33582:1015 548.33917:458 549.34253:57	119.08425:95 185.13235:41 191.59032:48 241.19398:55 357.22525:57 399.20071:67 457.28809:121 457.30539:244 496.32501:84 497.28885:777 547.33551:1639	2159.57	2246.81	2323.4	2521.28	2438.3	0	12.5	12.5	17.8571	23.2143	10	20	10	12	12	2337.79	13.2143
292	12.327	547.398	547.39789_12.327	Unknown	[M+H]+	similar chromatogram in higher mz_1364	1	True	null	null	null	null	null	null	999	False	False	False		False	False	null	null	null	null	null	null	null	25.04	Lipidomics_pos_AH_01	547.39783:2134 548.40118:874 549.40454:270	113.13361:235 193.0121:669 547.39313:222	4540.43	4897.87	4217.02	4889.36	4906.38	4180.36	4083.93	4194.64	4196.43	4703.57	1986	1851	2016	1709	2418	4690.13	4271.45
293	2.634	548.334	548.33398_2.634	w/o MS2:PE 6:0_16:2	[M+H]+		1	True	6.4	548.335	C27H50NO8P	PE	YUFVASMUDPFUJU-UHFFFAOYSA-N	O=C(OCC(OC(=O)CCCCCCCC=CCC=CCCC)COP(=O)(O)OCCN)CCCCC	530	True	True	False		False	False	null	null	99.8	99.9	null	null	null	118.59	Lipidomics_pos_AH_04	548.33398:10714 549.33733:3718 550.34069:792	184.07349:6909	17348.9	19023.4	16755.3	22795.7	21410.6	5123.21	5592.86	4960.71	4541.07	5751.79	4673	4634	4185	4289	3934	19466.6	5194.04
294	14.507	548.503	548.5033_14.507	w/o MS2:Cer 13:0;2O/22:2;O	[M+NH4]+	adduct linked to 262_[M+H]+	1	True	9.29	548.504	C35H67NO4	Cer_HDS	VKOOPZWKDVJCLX-UHFFFAOYSA-N	O=C(NC(CO)C(O)CCCCCCCCCC)C(O)CCCCCCCCCCC=CCC=CCCCCC	530	True	True	False		False	False	null	null	99.9	99.9	null	null	null	192.58	Lipidomics_pos_BL_05	548.5033:35467 549.50665:14755 550.51001:2923	147.07864:25 359.32968:35	67063.8	62951.1	65842.6	63589.4	75091.5	53451.8	53787.5	56012.5	54562.5	63333.9	27046	26775	27056	26378	30684	66907.7	56229.5
295	14.159	548.538	548.53815_14.159	Cer 36:1;2O|Cer 18:1;2O/18:0	[M+H-H2O]+	adduct linked to 341_[M+H]+; adduct linked to 400_[M+H]+	1	True	10.71	548.54	C36H71NO3	Cer_NS	VODZWWMEJITOND-UHFFFAOYSA-N	O=C(NC(CO)C(O)C=CCCCCCCCCCCCCC)CCCCCCCCCCCCCCCCC	410	True	True	True		False	False	null	null	98.5	99.9	54.3	42.9	100	24.96	Lipidomics_pos_AH_04	548.53827:1990 549.54162:1147 550.54498:223	72.08893:60 133.08382:59 236.23575:136 252.27979:51 264.26837:1119 305.13644:102 475.37347:39 518.56183:43 548.53912:1937	3644.68	4176.6	3246.81	4234.04	3891.49	5489.29	6155.36	6312.5	6589.29	5967.86	3572	3320	3796	3227	3270	3838.75	6102.66
296	18.365	549.485	549.48511_18.365	Unknown	[M+H]+	ion correlated with 373; found in higher mz's MsMs_1480; found in higher mz's MsMs_1635	0.867	True	null	null	null	null	null	null	999	False	False	False		False	False	null	null	null	null	null	null	null	30.33	Lipidomics_pos_AH_01	549.48724:4160 550.49059:1877 551.49395:4055	81.06933:255 97.10097:86 135.11552:61 149.05791:499 165.16476:40 205.12083:62 227.19885:17 377.31323:18 420.3537:467 475.40823:129 549.48389:5810	8851.06	12531.9	5659.57	13000	10312.8	4328.57	4642.86	4571.43	4333.93	4625	4539	3996	3597	3296	3369	10071.2	4499.93
297	12.122	549.487	549.48669_12.122	w/o MS2:RIKEN P-VS1 ID-4968 from Cell_HEK293_WT_N_Ctr	[M+H]+		0.2	True	11.34	549.48		Unknown			530	True	True	False		False	False	null	null	81.3	100	null	null	null	16.95	Lipidomics_pos_CON_04	549.48669:1968 550.49004:398 551.4934:251	71.08447:71	1080.85	919.149	772.34	1036.17	1076.6	814.286	964.286	767.857	1042.86	950	2106	1506	1798	1968	1898	977.473	908.036
298	13.928	549.487	549.48737_13.928	Unknown	[M+H]+		0.667	True	null	null	null	null	null	null	999	False	False	False		False	False	null	null	null	null	null	null	null	14.63	Lipidomics_pos_AH_05	549.48718:1217 550.49053:505 551.49389:191	420.35339:111	1659.57	2457.45	2672.34	2825.53	2589.36	1989.29	2673.21	2092.86	2083.93	2476.79	2273	2147	1648	1813	2056	2440.82	2262.92
299	18.026	549.488	549.48773_18.026	Unknown	[M+H]+		0.067	False	null	null	null	null	null	null	999	False	False	False		False	False	null	null	null	null	null	null	null	22.32	Lipidomics_pos_BL_03	549.48773:2027 550.49108:747 551.49444:957		4217.02	4304.26	3721.28	5774.47	5236.17	2721.43	3210.71	3619.64	2653.57	3157.14	2052	1979	1672	1539	1757	4650.8	3072.83
300	3.457	550.35	550.34979_3.457	PC 19:1	[M+H]+	adduct linked to 353_[M+Na]+	1	True	5.83	550.35	C27H52NO8P	PC	JGIJSYPGROROTH-UHFFFAOYSA-N	O=C(OCC(OC(=O)CCCCCCCC=CCCC)COP(=O)([O-])OCC[N+](C)(C)C)CCCCC	420	True	True	True		False	False	null	null	87.4	100	85.2	69.4	83.3	635.23	Lipidomics_pos_BL_01	550.3501:11900 551.35345:3745 552.35681:829	184.07362:3552 504.34518:26 550.35107:2218	71208.5	77651.1	66759.6	83970.2	83600	21250	24866.1	23487.5	20673.2	27460.7	35233	33343	34494	32024	31081	76637	23547.3
301	13.403	551.326	551.32635_13.403	Unknown	[M+H]+	found in higher mz's MsMs_614; found in higher mz's MsMs_659; found in higher mz's MsMs_753; found in higher mz's MsMs_474; found in higher mz's MsMs_2182; found in higher mz's MsMs_510	1	True	null	null	null	null	null	null	999	False	False	False		False	False	null	null	null	null	null	null	null	39.79	Lipidomics_pos_AH_01	551.32782:2665 552.33117:1641 553.33453:309	327.07202:300 439.20242:569	5670.21	4470.21	4676.6	4082.98	4812.77	3851.79	4025	6517.86	7010.71	6716.07	2588	1482	1567	2069	2003	4742.71	5624.06
302	11.835	551.499	551.49902_11.835	Unknown	[M+H]+		0.667	True	null	null	null	null	null	null	999	False	False	False		False	False	null	null	null	null	null	null	null	17.29	Lipidomics_pos_BL_01	551.50256:1069 552.50591:607 553.50927:0	71.08415:60 85.10283:81 551.50128:1164	680.851	761.702	1185.11	1280.85	1519.15	1908.93	2112.5	1866.07	2325	2203.57	1529	1519	1628	1645	1811	1085.82	2083.3
303	18.392	551.5	551.50037_18.392	Unknown	[M+H]+		0.533	True	null	null	null	null	null	null	999	False	False	False		False	False	null	null	null	null	null	null	null	34	Lipidomics_pos_AH_02	551.50061:4376 552.50396:2033 553.50732:771	81.06933:39	7442.55	9310.64	5140.43	9380.85	7746.81	4362.5	5026.79	4475	4082.14	4976.79	3985	3087	3465	2776	2795	7804.2	4584.51
304	19.143	551.502	551.50153_19.143	Unknown	[M+H]+		0.067	False	null	null	null	null	null	null	999	False	False	False		False	False	null	null	null	null	null	null	null	21.77	Lipidomics_pos_CON_04	551.50153:2621 552.50488:745 553.50824:304		4482.98	4829.79	4195.74	5438.3	5212.77	2219.64	3012.5	2769.64	2560.71	3266.07	2401	2918	2318	2621	2548	4831.91	2766
305	18.754	551.502	551.50183_18.754	Unknown	[M+H]+	similar chromatogram in higher mz_1493; found in higher mz's MsMs_1493; similar chromatogram in higher mz_1764; similar chromatogram in higher mz_1745; similar chromatogram in higher mz_1617; similar chromatogram in higher mz_2054	1	True	null	null	null	null	null	null	999	False	False	False		False	False	null	null	null	null	null	null	null	76.72	Lipidomics_pos_AH_01	551.5014:7604 552.50475:3489 553.50811:795	97.10022:26	16178.7	20451.1	12870.2	21951.1	16923.4	8355.36	11164.3	9401.79	8119.64	10287.5	9152	6674	8505	8109	7726	17675.4	9465.83
306	14.669	551.503	551.5025_14.669	Unknown	[M+H-H2O]+	ion correlated with 398; ion correlated with 405; adduct linked to 398_[M+NH4]+; found in higher mz's MsMs_398; adduct linked to 405_[M+Na]+; similar chromatogram in higher mz_475	1	True	null	null	null	null	null	null	999	False	False	False		False	False	null	null	null	null	null	null	null	40.05	Lipidomics_pos_AH_01	551.50201:1984 552.50536:662 553.50872:174	67.05539:30 71.08459:165 105.06914:39 108.05087:82 421.35956:64 551.29156:39 551.50385:2778	4221.28	5027.66	4482.98	5942.55	5461.7	4691.07	5817.86	5417.86	4785.71	6271.43	5939	5747	5241	4945	5025	5027.05	5396.99
307	2.658	552.269	552.26947_2.658	PE 21:4	[M+Na]+	adduct linked to 259_[M+H]+	0.667	True	5.24	552.27	C26H44NO8P	PE	BDHGEVAGRLCJCP-UHFFFAOYSA-N	O=C(OCC(OC(=O)CC=CCC=CCC=CCC=CCC)COP(=O)(O)OCCN)CCCCC	420	True	True	True		False	False	null	null	91.8	100	92	49.2	100	32.04	Lipidomics_pos_AH_03	552.26855:1156 553.2719:392 554.27526:264	164.00513:183 411.25122:338 506.26324:27 509.22714:462	3095.74	3708.51	2459.57	3993.62	3595.74	1280.36	1330.36	1408.93	1392.86	1480.36	1585	1743	1526	1396	1475	3370.88	1378.42
308	8.255	552.482	552.48218_8.255	w/o MS2:Cer 13:0;2O/24:6	[M+H]+		1	True	8.94	552.477	C37H63NO3	Cer_NDS	HZIJCZARIHLCQX-UHFFFAOYSA-N	O=C(NC(CO)C(O)CCCCCCCCCC)CCCCC=CCC=CCC=CCC=CCC=CCC=CCC	530	True	True	False		False	False	null	null	91.4	100	null	null	null	18.64	Lipidomics_pos_CON_02	552.48218:2898 553.48553:1275 554.48889:255	83.08525:24 89.05979:357 133.08556:103 141.16338:6 265.16498:7 339.23792:97 461.37949:4 535.45514:193 552.48291:2219	4761.7	4174.47	3480.85	3508.51	3200	2955.36	4110.71	2917.86	2403.57	2392.86	1970	2898	1598	1417	1459	3825.29	2956.5
309	11.055	553.388	553.38849_11.055	DG 30:5	[M+Na]+		0.133	True	8.09	553.386	C33H54O5	DG	DJXJTJKDICBWFD-UHFFFAOYSA-N	O=C(OCC(OC(=O)CCCCCC=CCC=CCC=CCC=CCC=CCC)CO)CCCCCCC	420	True	True	True		False	False	null	null	100	100	56.1	75	100	12.76	Lipidomics_pos_CON_01	553.38849:1205 554.39184:446 555.3952:310	184.07135:69 553.34052:68	1572.34	2236.17	1576.6	1991.49	1704.26	885.714	1532.14	992.857	980.357	1471.43	1205	595	820	688	529	1816.22	1172.12
310	14.507	553.458	553.45795_14.507	w/o MS2:NAGly 8:0;O(FA 22:2)	[M+Na]+	adduct linked to 262_[M+H]+	1	True	8	553.458	C32H57NO5	NAGly	NZXVOXOUAINEMH-UHFFFAOYSA-N	O=C(O)CNC(=O)CCCC(OC(=O)CCCCCCCCCCCC=CCC=CCCCCC)CCC	530	True	True	False		False	False	null	null	99.9	99.8	null	null	null	31.73	Lipidomics_pos_AH_05	553.45795:2891 554.4613:1139 555.46466:235	553.38794:52 553.45886:6703	5617.02	5536.17	5055.32	4812.77	6151.06	4444.64	4653.57	4928.57	4896.43	4717.86	1872	2286	1894	2043	2391	5434.49	4727.97
311	2.486	554.287	554.28717_2.486	PE 21:3	[M+Na]+		1	True	5.76	554.285	C26H46NO8P	PE	LXENZMWNVBIGQF-UHFFFAOYSA-N	O=C(OCC(OC(=O)CCCCC=CCC=CCC=CCC)COP(=O)(O)OCCN)CCCCC	420	True	True	True		False	False	null	null	81.2	99.9	94.7	26.6	90	197.99	Lipidomics_pos_BL_05	554.28711:7287 555.29046:2321 556.29382:653	69.06996:26 79.05378:95 95.08589:59 143.08624:37 208.03445:23 223.06398:44 347.24734:19 371.09973:25 413.26935:3094 554.28662:664	12163.8	14483	11500	16827.7	16678.7	9332.14	10530.4	11503.6	10130.4	13012.5	10510	10687	10189	9186	9037	14330.4	10901.3
312	15.456	555.533	555.53308_15.456	w/o MS2:RIKEN P-VS1 ID-5081 from Cell_HEK293_WT_N_Ctr	[M+H]+	ion correlated with 68; ion correlated with 278; ion correlated with 370; ion correlated with 677; ion correlated with 623; adduct linked to 278_[M+H-H2O]+	0.333	True	12.88	555.532		Unknown			530	True	True	False		False	False	null	null	99.7	100	null	null	null	75.87	Lipidomics_pos_CON_01	555.53308:2685 556.53643:1403 557.53979:375	151.14656:47 183.20813:54 239.23589:72 285.2439:160 313.27307:2703 537.48187:27	191.489	212.766	238.298	229.787	221.277	603.571	653.571	655.357	496.429	882.143	2685	2204	2199	1963	2124	218.803	658.371
313	2.415	556.288	556.28772_2.415	Unknown	[M+H]+		0.067	True	null	null	null	null	null	null	999	False	False	False		False	False	null	null	null	null	null	null	null	41.5	Lipidomics_pos_CON_04	556.28772:1146 557.29107:358 558.29443:207	109.10007:81 157.04996:41 171.09795:52 211.1302:23 213.11253:46 254.17453:32 273.10919:62 371.22412:29 415.26913:138	1423.4	1442.55	1408.51	1510.64	1678.72	1226.79	1151.79	1008.93	1028.57	1164.29	1027	1035	1290	1146	892	1492.23	1116.16
314	2.775	556.302	556.30249_2.775	PE 21:2	[M+Na]+		1	True	5.9	556.301	C26H48NO8P	PE	OMJWCFPYEUPZBS-UHFFFAOYSA-N	O=C(OCC(OC(=O)CCCCCCC=CCC=CCCC)COP(=O)(O)OCCN)CCCCC	420	True	True	True		False	False	null	null	81.3	100	95.4	26.7	90	123.11	Lipidomics_pos_CON_03	556.30298:3992 557.30633:1564 558.30969:303	131.0844:15 226.05115:13 415.28464:777 556.30579:79	11168.1	13510.6	9819.15	14861.7	14512.8	4398.21	5317.86	5560.71	4948.21	6441.07	4337	4147	3992	4141	3678	12774.5	5332.81
315	3.103	556.302	556.30249_3.103	w/o MS2:PE 21:2	[M+H]+		0.067	True	5.9	556.301	C26H48NO8P	PE	OMJWCFPYEUPZBS-UHFFFAOYSA-N	O=C(OCC(OC(=O)CCCCCCC=CCC=CCCC)COP(=O)(O)OCCN)CCCCC	530	True	True	False		False	False	null	null	99.1	100	null	null	null	31.51	Lipidomics_pos_CON_01	556.30249:1372 557.30584:556 558.3092:154	75.04354:37 95.08482:58 119.08503:86 145.10083:32 189.16493:21 239.17897:23 295.2431:36 371.22812:11 539.42706:20 556.3028:636	1655.32	1970.21	1504.26	2223.4	1648.94	694.643	942.857	925	816.071	976.786	1372	1234	1138	1171	1147	1800.64	870.871
316	3.492	556.442	556.44153_3.492	w/o MS2:CAR 28:6	[M+H]+		1	True	7.52	556.436	C35H57NO4	CAR	KJDAZRYTTRAXFR-UHFFFAOYSA-N	O=C([O-])CC(OC(=O)CCCCCCCCC=CCC=CCC=CCC=CCC=CCC=CCC)C[N+](C)(C)C	530	True	True	False		False	False	null	null	88.3	99.9	null	null	null	38.3	Lipidomics_pos_CON_02	556.44153:3727 557.44488:1222 558.44824:361	257.2482:42 309.18921:20 415.31958:18	4089.36	5791.49	5546.81	4651.06	4057.45	3355.36	5760.71	4358.93	2639.29	2608.93	2503	3727	2946	2134	1972	4827.07	3744.91
317	3.525	558.319	558.31891_3.525	PE 23:4	[M+H]+		1	True	5.82	558.319	C28H48NO8P	PE	NWEVRCPZBIGZLD-UHFFFAOYSA-N	O=C(OCC(OC(=O)CCCC=CCC=CCC=CCC=CCC)COP(=O)(O)OCCN)CCCCC	420	True	True	True		False	False	null	null	91.2	100	72.4	70	100	183.25	Lipidomics_pos_BL_01	558.31854:5831 559.32189:2161 560.32525:616	79.05422:55 85.10089:35 103.04005:47 119.08392:57 145.09909:32 185.13187:48 199.14616:18 223.15012:10 243.20856:27 343.26425:12 417.29898:5010 558.31982:784	27702.1	32970.2	26191.5	38061.7	36166	10412.5	12510.7	11975	11321.4	13519.6	9295	9385	8563	8641	8459	32218.5	11948.2
318	13.82	558.507	558.5069_13.82	DG 30:0|DG 14:0_16:0	[M+NH4]+	adduct linked to 251_[M+H-H2O]+	0.467	True	10.18	558.509	C33H64O5	DG	NYNQTTOUQMCOEM-UHFFFAOYSA-N	O=C(OCC(OC(=O)CCCCCCCCCCCCCCC)CO)CCCCCCCCCCCCC	410	True	True	True		False	False	null	null	100	99.9	74.4	58.8	100	25.85	Lipidomics_pos_BL_02	558.50812:1263 559.51147:764 560.51483:263	239.23849:219 285.22726:268 313.27325:1378	1476.6	1768.09	1465.96	2068.09	2012.77	2130.36	2255.36	2032.14	2069.64	2294.64	1833	1328	1734	1516	1312	1758.7	2156.12
319	2.496	560.275	560.27515_2.496	Unknown	[M+H]+		0.067	True	null	null	null	null	null	null	999	False	False	False		False	False	null	null	null	null	null	null	null	22.84	Lipidomics_pos_AH_04	560.27515:1001 561.2785:431 562.28186:181	162.95671:236 501.18796:300	1772.34	1842.55	1995.74	2129.79	1963.83	635.714	637.5	648.214	735.714	696.429	718	851	854	577	592	1940.96	670.871
320	4.591	560.334	560.33368_4.591	PE 23:3	[M+H]+		0.867	True	6.09	560.335	C28H50NO8P	PE	WGZNHFDCBCNMGC-UHFFFAOYSA-N	O=C(OCC(OC(=O)CCCCCC=CCC=CCC=CCC)COP(=O)(O)OCCN)CCCCCC	420	True	True	True		False	False	null	null	98.6	100	71.7	69.7	100	49.15	Lipidomics_pos_CON_05	560.33502:2119 561.33837:662 562.34173:225	79.05334:23 91.05292:32 103.0392:36 117.06752:19 133.10236:11 147.07993:12 147.12:16 217.1964:10 233.22466:8 299.2522:10 327.26959:15 417.90976:12 419.31528:4117 560.33496:767	4157.45	4559.57	4168.09	5165.96	5589.36	1737.5	2008.93	2019.64	1823.21	2389.29	2332	2381	2382	2214	2119	4727.79	1995.62
321	13.225	560.5	560.50049_13.225	RIKEN P-VS1 ID-5175 from Cell_C2C12_WT_N_4h10AA	[M+H]+	adduct linked to 241_[M+H-H2O]+	1	True	10.39	560.494		Unknown			430	True	True	True		False	False	null	null	82.1	100	88	83.3	50	181.69	Lipidomics_pos_AH_04	560.49963:7096 561.50298:3674 562.50634:632	255.23405:52 560.47101:218 560.47937:822 560.5025:4601	15229.8	18100	15893.6	15097.9	16563.8	15351.8	17614.3	17242.9	17762.5	16339.3	6864	6544	6201	7133	6528	16176.6	16862.4
322	6.593	561.255	561.25482_6.593	Unknown	[M+H]+		0.067	True	null	null	null	null	null	null	999	False	False	False		False	False	null	null	null	null	null	null	null	33.21	Lipidomics_pos_AH_02	561.25482:1144 562.25817:660 563.26153:184	178.09364:23 406.32828:78	1885.11	2434.04	1708.51	2078.72	1653.19	1608.93	1689.29	1369.64	1589.29	1453.57	775	728	797	819	805	1951.44	1542.39
323	2.063	561.351	561.35132_2.063	DG 31:8	[M+Na]+	ion correlated with 326	0.333	True	7.26	561.355	C34H50O5	DG	VKCJZPPAKWBJIT-UHFFFAOYSA-N	O=C(OCC(OC(=O)CCC=CCC=CCC=CCC=CCC)CO)CC=CCC=CCC=CCC=CCC	420	True	True	True		False	False	null	null	100	99.9	53.6	75	100	275.98	Lipidomics_pos_AH_02	561.35132:12391 562.35467:5626 563.35803:0	81.07235:82 131.086:63 183.11742:49 201.16241:222 205.6032:174 254.651:26 365.24103:91 371.24313:483 471.28857:138 525.32336:2051 531.33612:225 560.84174:48 561.35144:6970	22285.1	26363.8	20306.4	23927.7	24942.6	0	21.4286	0	23.2143	0	0	12	0	11	0	23565.5	9.19643
324	13.513	561.525	561.5249_13.513	Unknown	[M+H]+	similar chromatogram in higher mz_727	0.6	True	null	null	null	null	null	null	999	False	False	False		False	False	null	null	null	null	null	null	null	48.81	Lipidomics_pos_BL_02	561.52515:1136 562.5285:470 563.53186:0	69.0713:66 279.26794:266 561.50806:1133	1823.4	2006.38	1978.72	1853.19	1753.19	1537.5	2028.57	2255.36	2071.43	2119.64	2651	2102	2318	3438	2623	1882.87	2002.54
325	17.883	561.558	561.55823_17.883	Unknown	[M+H]+		0.6	True	null	null	null	null	null	null	999	False	False	False		False	False	null	null	null	null	null	null	null	32.8	Lipidomics_pos_AH_04	561.55835:1267 562.5617:837 563.56506:156	69.06979:93 95.08483:33 111.08082:38 127.10956:48 153.12422:51 157.1237:25 171.13879:17 177.1629:55 199.17177:51 237.22139:110 487.48035:18 561.52313:324	1906.38	2163.83	2072.34	2695.74	2782.98	1703.57	2003.57	1969.64	1673.21	2216.07	1273	1425	1150	1079	1075	2324.02	1913.08
326	2.059	561.853	561.85297_2.059	Unknown	[M+H]+	ion correlated with 323	0.333	False	null	null	null	null	null	null	999	False	False	False		False	False	null	null	null	null	null	null	null	166.78	Lipidomics_pos_AH_05	561.85297:9409 562.85632:682 563.85968:0		14789.4	17891.5	18380.9	17631.9	20019.1	0	0	0	0	0	0	0	0	0	0	17742.7	0
327	3.265	562.291	562.29095_3.265	Unknown	[M+H]+		0.467	True	null	null	null	null	null	null	999	False	False	False		False	False	null	null	null	null	null	null	null	48.15	Lipidomics_pos_AH_01	562.29047:1072 563.29382:428 564.29718:115	86.09587:75 162.9534:118 457.20306:18 503.21579:321	2280.85	1897.87	1744.68	2321.28	1993.62	1650	1973.21	1664.29	1487.5	1775	943	1069	1067	1055	1005	2048.14	1710.02
328	7.185	562.359	562.35883_7.185	w/o MS2:SL 12:2;O/20:5	[M+H]+	ion correlated with 330; similar chromatogram in higher mz_330; similar chromatogram in higher mz_2164	0.333	True	6.14	562.356	C32H51NO5S	SL	NLONFNHODSYTQO-UHFFFAOYSA-N	O=C(N(CC(O)C=CCCC=CCCC)CS(=O)(=O)O)CCCC=CCC=CCC=CCC=CCC=CCC	530	True	True	False		False	False	null	null	97.1	100	null	null	null	305.11	Lipidomics_pos_AH_04	562.35883:18394 563.36218:6276 564.36554:443	93.06911:29 107.08526:87 131.08241:46 142.07478:23 145.10068:150 151.14629:8 173.13385:28 175.14738:55 187.14801:278 197.13165:29 201.1636:77 211.14661:36 214.12265:67 276.15479:40 279.21039:16 365.24033:31 372.24835:172 379.25668:423 389.29803:42 403.78882:27 425.22128:14 432.30359:15 472.32721:234 472.82831:42 509.36169:37 525.32086:51 562.35919:3662	34925.5	37544.7	35389.4	39136.2	33719.1	28.5714	48.2143	25	60.7143	10.7143	21	40	17	18	21	36143.2	34.2857
329	13.628	562.517	562.51685_13.628	w/o MS2:Cer 12:0;2O/22:0	[M+H]+	similar chromatogram in higher mz_380	0.333	True	10.31	562.517	C34H69NO3	Cer_NDS	BNCLVOQOQJRZRY-UHFFFAOYSA-N	O=C(NC(CO)C(O)CCCCCCCCC)CCCCCCCCCCCCCCCCCCCCC	530	True	True	False		False	False	null	null	100	99.9	null	null	null	59.55	Lipidomics_pos_BL_04	562.51685:2339 563.5202:1107 564.52356:453	560.59619:32	1093.62	1125.53	819.149	834.043	1582.98	3928.57	3878.57	3648.21	4176.79	2748.21	349	509	107	501	527	1091.01	3675.8
330	7.185	562.86	562.86029_7.185	Unknown	[M+H]+	ion correlated with 328	0.333	True	null	null	null	null	null	null	999	False	False	False		False	False	null	null	null	null	null	null	null	1318.58	Lipidomics_pos_AH_01	562.86084:12859 563.86419:1815 564.86755:56	69.07071:70 91.05312:36 95.08475:255 105.0692:176 111.07937:37 131.0853:77 143.08319:75 164.15057:26 171.12:126 173.13101:197 185.13197:149 187.14796:565 197.13258:69 199.14874:372 200.14926:62 211.14717:119 243.17204:41 245.16061:116 259.16162:54 277.16217:250 309.26074:38 345.20184:41 364.73248:69 372.24939:260 379.25916:400 385.75708:18 407.30692:39 427.23825:7131 428.24017:3596 430.25623:60 4…	27359.6	31053.2	28066	30329.8	26366	0	0	0	17.8571	0	0	0	0	0	0	28634.9	3.39286
331	13.802	563.464	563.46405_13.802	DG 30:0	[M+Na]+		0.133	True	10.15	563.465	C33H64O5	DG	CSPQFUGHYJVYJM-UHFFFAOYSA-N	O=C(OCC(OC(=O)CCCCCCC)CO)CCCCCCCCCCCCCCCCCCCCC	420	True	True	True		False	False	null	null	100	99.9	73.1	75	100	21.21	Lipidomics_pos_BL_05	563.4632:1411 564.46655:654 565.46991:330	209.10931:113 503.43835:54 563.4646:3033 563.49438:442	1842.55	2208.51	1823.4	2780.85	2538.3	2383.93	2532.14	2298.21	2091.07	2519.64	1508	1372	1458	1084	1368	2238.96	2364.82
332	18.557	563.5	563.50006_18.557	Unknown	[M+H]+		0.133	False	null	null	null	null	null	null	999	False	False	False		False	False	null	null	null	null	null	null	null	14.16	Lipidomics_pos_AH_04	563.50006:1953 564.50341:633 565.50677:975		3374.47	3934.04	3340.43	4155.32	3914.89	1807.14	2517.86	2700	2437.5	2473.21	1566	2003	1733	1455	1550	3743.16	2387.57
333	19.329	563.538	563.53772_19.329	w/o MS2:RIKEN P-VS1 ID-5214 from Cell_C2C12_WT_N_0hCtr	[M+H]+	found in higher mz's MsMs_1573	0.667	True	6.78	563.541		Unknown			530	True	True	False		False	False	null	null	95	99.2	null	null	null	42.14	Lipidomics_pos_AH_04	563.53772:4402 564.54107:2460 565.54443:1788	71.08487:30 85.10037:27 563.49933:25	7676.6	7802.13	4670.21	9365.96	8436.17	1044.64	1310.71	1617.86	1548.21	1685.71	2572	2000	2448	1980	2117	7590.27	1442.08
334	15.45	563.539	563.53906_15.45	w/o MS2:RIKEN P-VS1 ID-5214 from Cell_C2C12_WT_N_0hCtr	[M+H]+	ion correlated with 413	0.133	True	6.78	563.541		Unknown			530	True	True	False		False	False	null	null	98	99.6	null	null	null	16.17	Lipidomics_pos_CON_01	563.53906:1175 564.54241:484 565.54577:221	563.53479:1410	365.957	468.085	470.213	489.362	461.702	842.857	950	873.214	741.071	1037.5	1175	1115	990	889	917	450.505	888.304
335	12.216	565.386	565.38556_12.216	DG 31:6	[M+Na]+		0.067	True	8.09	565.386	C34H54O5	DG	YUFJSIOGLNXAPM-UHFFFAOYSA-N	O=C(OCC(OC(=O)CCC=CCC=CCC=CCC=CCC=CCC=CCC)CO)CCCCCCCC	420	True	True	True		False	False	null	null	100	99.9	74.5	75	100	29.47	Lipidomics_pos_BL_02	565.38556:1336 566.38891:478 567.39227:353	89.05933:79 565.38373:1890	2336.17	1708.51	1789.36	1859.57	1346.81	1533.93	2385.71	1633.93	1319.64	1419.64	269	405	345	348	318	1807.66	1658.24
336	12.433	565.387	565.38702_12.433	DG 31:6	[M+Na]+		0.067	True	8.09	565.386	C34H54O5	DG	YUFJSIOGLNXAPM-UHFFFAOYSA-N	O=C(OCC(OC(=O)CCC=CCC=CCC=CCC=CCC=CCC=CCC)CO)CCCCCCCC	420	True	True	True		False	False	null	null	100	99.9	75	75	100	20.06	Lipidomics_pos_AH_04	565.38702:1030 566.39037:611 567.39373:0	565.38214:808	940.426	2131.91	1106.38	2191.49	1580.85	1601.79	1578.57	1648.21	1244.64	1519.64	444	528	368	317	450	1590.08	1518.64
337	18.912	565.517	565.51703_18.912	Unknown	[M+H]+		0.267	True	null	null	null	null	null	null	999	False	False	False		False	False	null	null	null	null	null	null	null	27.46	Lipidomics_pos_CON_01	565.51746:2042 566.52081:625 567.52417:244	235.23869:31 239.23389:64 565.35583:91 565.51886:1520	3097.87	3557.45	3297.87	4861.7	3451.06	2178.57	2612.5	2732.14	2660.71	2728.57	2042	2050	1759	1660	1747	3652.93	2582.34
338	19.676	565.553	565.55341_19.676	w/o MS2:RIKEN P-VS1 ID-5234 from Cell_HeLa_WT_N_Ctr	[M+H]+	found in higher mz's MsMs_1589	0.667	True	13.22	565.558		Unknown			530	True	True	False		False	False	null	null	91.3	99.8	null	null	null	42.53	Lipidomics_pos_AH_02	565.55341:3713 566.55676:2278 567.56012:510	565.36853:18	5255.32	7900	4421.28	7621.28	7044.68	948.214	1096.43	1075	1250	1337.5	2809	1773	2266	1927	2564	6448.4	1141.74
339	16.136	565.555	565.55469_16.136	w/o MS2:RIKEN P-VS1 ID-5234 from Cell_HeLa_WT_N_Ctr	[M+H-H2O]+	ion correlated with 391; ion correlated with 456; ion correlated with 505; adduct linked to 391_[M+H]+; adduct linked to 456_[M+Na]+	0.333	True	13.22	565.558		Unknown			530	True	True	False		False	False	null	null	95.2	100	null	null	null	30.25	Lipidomics_pos_CON_01	565.55469:2314 566.55804:1699 567.5614:262	310.30698:16 565.51758:15	389.362	382.979	402.128	391.489	400	651.786	635.714	626.786	583.929	750	2314	1658	2000	1882	1962	393.537	649.821
340	14.642	565.565	565.56531_14.642	Unknown	[M+H]+		1	True	null	null	null	null	null	null	999	False	False	False		False	False	null	null	null	null	null	null	null	47.42	Lipidomics_pos_BL_02	565.56586:2142 566.56921:810 567.57257:293	165.05458:17 282.27878:632 310.30991:745 565.52856:252	4653.19	5465.96	4514.89	4880.85	10180.9	3423.21	3825	5301.79	6500	5669.64	2449	1979	1810	1869	2158	5939.34	4944.06
341	14.156	566.549	566.54919_14.156	Cer 36:1;2O|Cer 18:1;2O/18:0	[M+H]+	adduct linked to 295_[M+H-H2O]+; similar chromatogram in higher mz_451	1	True	10.71	566.551	C36H71NO3	Cer_NS	VODZWWMEJITOND-UHFFFAOYSA-N	O=C(NC(CO)C(O)C=CCCCCCCCCCCCCC)CCCCCCCCCCCCCCCCC	410	True	True	True		False	False	null	null	100	99.9	86.9	66.8	100	52.72	Lipidomics_pos_AH_04	566.54803:1620 567.55138:999 568.55474:327	95.08549:69 184.07617:93 252.26895:208 264.26883:2314 530.50372:50 530.52863:338 566.43744:142	2880.85	3146.81	2706.38	3446.81	3121.28	4607.14	5032.14	4798.21	4798.21	5116.07	2908	2629	2531	2720	3063	3060.74	4870.16
342	2.325	568.339	568.33862_2.325	LPC 22:6	[M+H]+		1	True	5.67	568.34	C30H50NO7P	LPC	LSOWKZULVQWMLY-UHFFFAOYSA-N	O=C(OCC(O)COP(=O)([O-])OCC[N+](C)(C)C)CCC=CCC=CCC=CCC=CCC=CCC=CCC	410	True	True	True		False	False	null	null	100	99.9	90	50.6	100	46.55	Lipidomics_pos_CON_03	568.33905:1839 569.3424:655 570.34576:459	86.097:164 184.07317:1331 550.33069:162	4431.91	5702.13	4306.38	4802.13	3870.21	3271.43	3298.21	3730.36	2910.71	2921.43	2144	1845	1839	1242	1811	4622.95	3226.43
343	6.322	568.478	568.47803_6.322	w/o MS2:Cer 13:2;2O/22:2	[M+H]+		1	True	8.71	568.47	C35H63NO3	Cer_NS	HNORZBIIICGNLJ-UHFFFAOYSA-N	O=C(NC(CO)C(O)C=CCCC=CCCCC)CCCCCCCCCCCC=CCC=CCCCCC	530	True	True	False		False	False	null	null	67.9	100	null	null	null	266.23	Lipidomics_pos_CON_02	568.47803:34754 569.48138:16865 570.48474:3045	83.08562:22 89.05945:425 127.14726:10 133.08568:111 175.10327:7 239.14928:10 363.30203:9 451.36438:9 495.39041:65 568.47778:2230	43644.7	42825.5	35859.6	35604.3	24631.9	31610.7	43812.5	26519.6	26048.2	20155.4	19316	34754	16670	13902	15830	36513.4	29629.2
344	14.51	568.565	568.56464_14.51	w/o MS2:Cer 12:0;2O/24:0	[M+H]+		0.333	True	11.47	568.566	C36H73NO3	Cer_NDS	OKHRSGZCLBVKRN-UHFFFAOYSA-N	O=C(NC(CO)C(O)CCCCCCCCC)CCCCCCCCCCCCCCCCCCCCCCC	530	True	True	False		False	False	null	null	99	100	null	null	null	45.12	Lipidomics_pos_BL_03	568.56464:2733 569.56799:963 570.57135:362	266.2851:49 550.55322:276	927.66	1193.62	874.468	1082.98	1144.68	4230.36	4678.57	4880.36	4591.07	4519.64	431	461	587	405	574	1044.49	4580.09
345	11.065	569.362	569.36212_11.065	w/o MS2:SL 12:1;O/18:5;O	[M+H]+		0.867	True	5.92	569.362	C30H49NO6S	SL	WLPKWWUMFLHKRS-UHFFFAOYSA-N	O=C(N(CC(O)C=CCCCCCCC)CS(=O)(=O)O)C(O)C=CCC=CCC=CCC=CCC=CCC	530	True	True	False		False	False	null	null	100	99.9	null	null	null	10.72	Lipidomics_pos_AH_02	569.36212:2736 570.36547:1507 571.36883:594	178.09787:40 329.15341:168	3700	5821.28	4259.57	4931.91	3608.51	1864.29	3466.07	2460.71	1951.79	3166.07	2421	1256	1695	1140	966	4464.6	2581.87
346	14.514	569.432	569.43207_14.514	w/o MS2:VAE 18:3	[M+H]+		1	True	11.86	569.433	C38H58O2	VAE	WGYRYGOQDJJQIQ-UHFFFAOYSA-N	O=C(OCC=C(C=CC=C(C=CC1=C(C)CCCC1(C)C)C)C)CCCCCCCC=CCC=CCC=CCC	530	True	True	False		False	False	null	null	99.7	100	null	null	null	122.1	Lipidomics_pos_BL_05	569.43207:19820 570.43542:6856 571.43878:2423	284.29562:40 569.43164:957	37087.2	33276.6	37827.7	33885.1	39344.7	32264.3	32660.7	32271.4	32535.7	35392.9	10229	11563	11396	11612	12572	36283.9	33024.7
347	2.071	569.865	569.86499_2.071	Unknown	[M+H]+	similar chromatogram in higher mz_2154	0.333	True	null	null	null	null	null	null	999	False	False	False		False	False	null	null	null	null	null	null	null	202.45	Lipidomics_pos_AH_01	569.8634:3233 570.86675:1713 571.87011:0	77.03457:12 86.08557:14 91.05382:65 104.10694:19 117.06881:21 125.09527:11 131.08562:49 143.08644:25 171.11642:31 175.14665:93 183.11555:15 185.13245:29 199.13365:13 199.14816:98 203.17841:70 211.14726:27 213.11411:144 215.17964:159 225.16264:42 241.19443:50 265.19193:22 267.20996:34 281.22385:46 370.04953:14 371.24081:107 384.25003:118 388.20563:18 403.25458:29 404.76776:23 427.22055:27 449.2978…	6878.72	8580.85	7419.15	10968.1	8212.77	0	0	0	0	0	0	0	0	0	0	8412.26	0
348	1.888	570.303	570.30292_1.888	Unknown	[M+H]+	ion correlated with 419; similar chromatogram in higher mz_419	0.333	True	null	null	null	null	null	null	999	False	False	False		False	False	null	null	null	null	null	null	null	111.43	Lipidomics_pos_AH_01	570.30292:1584 571.30627:397 572.30963:186	184.07327:2538 294.10654:26 338.17575:122 340.11313:710 383.17151:473 412.17245:208 440.2063:57	3370.21	3082.98	3306.38	3340.43	3063.83	1225	1010.71	844.643	864.286	980.357	824	785	855	811	714	3232.39	985
349	1.667	570.316	570.31561_1.667	w/o MS2:PE 22:2	[M+H]+		1	True	6.4	570.317	C27H50NO8P	PE	YUFVASMUDPFUJU-UHFFFAOYSA-N	O=C(OCC(OC(=O)CCCCCCCC=CCC=CCCC)COP(=O)(O)OCCN)CCCCC	530	True	True	False		False	False	null	null	99.6	99.9	null	null	null	56.16	Lipidomics_pos_CON_01	570.31561:4692 571.31896:2568 572.32232:436	70.06542:8 89.05904:21 130.15883:47 132.91049:20 570.29187:110 570.42804:61	7078.72	7772.34	7370.21	8095.74	7659.57	7107.14	6744.64	7046.43	6442.86	6573.21	4692	3886	4216	3663	3387	7594.76	6782.59
350	2.1	570.316	570.31573_2.1	w/o MS2:PE 22:2	[M+H]+		0.067	True	6.4	570.317	C27H50NO8P	PE	YUFVASMUDPFUJU-UHFFFAOYSA-N	O=C(OCC(OC(=O)CCCCCCCC=CCC=CCCC)COP(=O)(O)OCCN)CCCCC	530	True	True	False		False	False	null	null	99.7	99.9	null	null	null	52.17	Lipidomics_pos_AH_04	570.31573:2170 571.31908:683 572.32244:0	86.09676:99 133.10135:63 159.11357:41 184.07283:2810 222.08861:40 269.22379:28 296.13095:25 383.20468:88 389.31689:60 408.33478:21 449.34222:18 480.82352:359 501.8291:237 525.32574:241 554.32251:58 570.32849:1236	3476.6	2942.55	2874.47	4617.02	3429.79	607.143	648.214	983.929	775	1055.36	314	246	318	104	395	3468.38	813.839
351	2.596	570.354	570.35425_2.596	LPC 20:2	[M+Na]+		0.667	True	6.57	570.353	C28H54NO7P	LPC	YYQVCMMXPIJVHY-UHFFFAOYSA-N	O=C(OCC(O)COP(=O)([O-])OCC[N+](C)(C)C)CCCCCCCCCC=CCC=CCCCCC	410	True	True	True		False	False	null	null	95.3	99.9	48.2	73.9	100	12.47	Lipidomics_pos_BL_03	570.35437:1391 571.35772:517 572.36108:0	146.98193:53 465.23752:51 511.24393:102 570.26807:43	2640.43	3963.83	2727.66	3274.47	3074.47	2112.5	2166.07	2483.93	1483.93	1796.43	1212	1216	1116	862	1037	3136.17	2008.28
352	2.078	570.365	570.36523_2.078	Unknown	[M+H]+	ion correlated with 347; ion correlated with 104	0.267	True	null	null	null	null	null	null	999	False	False	False		False	False	null	null	null	null	null	null	null	60.43	Lipidomics_pos_AH_02	570.36523:2875 571.36858:333 572.37194:0	124.99711:101 480.32114:108	5600	6117.02	5182.98	5814.89	6010.64	25	30.3571	10.7143	0	23.2143	0	6	0	18	0	5745.4	17.7902
353	3.467	572.332	572.33191_3.467	w/o MS2:PC 19:1	[M+Na]+	adduct linked to 300_[M+H]+	0.667	True	5.83	572.332	C27H52NO8P	PC	JGIJSYPGROROTH-UHFFFAOYSA-N	O=C(OCC(OC(=O)CCCCCCCC=CCCC)COP(=O)([O-])OCC[N+](C)(C)C)CCCCC	530	True	True	False		False	False	null	null	99.9	100	null	null	null	59.15	Lipidomics_pos_AH_04	572.33191:2844 573.33526:851 574.33862:393	146.98148:636 504.33777:46 526.32043:189	4451.06	5842.55	4304.26	6051.06	5131.91	1503.57	1725	1357.14	1360.71	1676.79	2225	2271	2192	2218	2016	5156.54	1524.51
354	2.511	572.334	572.33441_2.511	PC 21:4	[M+H]+	adduct linked to 415_[M+Na]+	1	True	5.31	572.335	C29H50NO8P	PC	LWCTVICDBSAJJK-UHFFFAOYSA-N	O=C(OCC(OC(=O)CC=CCC=CCC=CCC=CCC)COP(=O)([O-])OCC[N+](C)(C)C)CCCCC	420	True	True	True		False	False	null	null	87.4	100	81.2	71.5	83.3	632.21	Lipidomics_pos_BL_01	572.33478:8271 573.33813:3456 574.34149:696	86.09574:46 124.99829:26 184.07294:1619 184.10185:33 286.11084:17 572.28247:34 572.29547:18 572.33417:387	94780.9	114045	96510.6	128183	117974	14769.6	15723.2	16610.7	14921.4	17107.1	8172	8948	8057	7508	7017	110299	15826.8
355	3.088	572.371	572.37067_3.088	LPC 22:4	[M+H]+		0.133	True	6.25	572.371	C30H54NO7P	LPC	GXEIJYZRCDTJTE-UHFFFAOYSA-N	O=C(OCC(O)COP(=O)([O-])OCC[N+](C)(C)C)CCCCCCCCC=CCC=CCC=CCC=CCC	410	True	True	True		False	False	null	null	96.3	100	94	34.9	100	37.74	Lipidomics_pos_AH_04	572.37067:1881 573.37402:833 574.37738:0	184.07321:4368 283.25827:23 570.47681:20	2978.72	4240.43	3706.38	4002.13	3002.13	744.643	664.286	741.071	850	760.714	505	478	373	570	424	3585.72	752.254
356	13.43	572.488	572.48773_13.43	TG 30:0|TG 10:0_10:0_10:0	[M+NH4]+		0.867	True	9.54	572.489	C33H62O6	TG	LADGBHLMCUINGV-UHFFFAOYSA-N	O=C(OCC(OC(=O)CCCCCCCCC)COC(=O)CCCCCCCCC)CCCCCCCCC	410	True	True	True		False	False	null	null	100	99.9	81	80	100	32.28	Lipidomics_pos_CON_02	572.48798:1816 573.49133:889 574.49469:363	355.28296:108 383.3157:1437 572.49261:366	2942.55	8110.64	2465.96	7814.89	4346.81	2478.57	2846.43	2803.57	2010.71	2448.21	1614	1816	1380	1136	1606	5136.12	2516.9
357	2.926	574.35	574.34998_2.926	PC 21:3	[M+H]+		0.733	True	5.64	574.35	C29H52NO8P	PC	UDSRKVWUBDBOQF-UHFFFAOYSA-N	O=C(OCC(OC(=O)CCCCC=CCC=CCC=CCC)COP(=O)([O-])OCC[N+](C)(C)C)CCCCC	420	True	True	True		False	False	null	null	87.5	100	85.4	69.9	83.3	108.12	Lipidomics_pos_CON_05	574.35004:1927 575.35339:788 576.35675:228	86.09649:158 184.07344:4177 528.36176:21 574.3512:2341	10372.3	12131.9	9863.83	13753.2	13027.7	2083.93	2107.14	2285.71	2105.36	2625	2426	2352	2089	2075	1927	11830.1	2241.76
358	3.234	574.35	574.35028_3.234	w/o MS2:PC 6:0_15:3	[M+H]+		0.2	False	5.64	574.35	C29H52NO8P	PC	UDSRKVWUBDBOQF-UHFFFAOYSA-N	O=C(OCC(OC(=O)CCCCC=CCC=CCC=CCC)COP(=O)([O-])OCC[N+](C)(C)C)CCCCC	530	True	True	False		False	False	null	null	100	100	null	null	null	67.98	Lipidomics_pos_AH_05	574.35028:2470 575.35363:1022 576.35699:194		3965.96	5082.98	4117.02	5238.3	5255.32	837.5	758.929	869.643	810.714	987.5	803	826	732	737	798	4731.99	852.902
359	12.253	574.459	574.45868_12.253	w/o MS2:Cer 15:3;2O/24:6	[M+H]+		0.133	True	8.78	574.462	C39H61NO3	Cer_NS	ZTZUCYUIVJOTDO-UHFFFAOYSA-N	O=C(NC(CO)C(O)C=CCCC=CCCC=CCC)CCCCC=CCC=CCC=CCC=CCC=CCC=CCC	530	True	True	False		False	False	null	null	96.1	99.9	null	null	null	20.46	Lipidomics_pos_BL_01	574.45868:1011 575.46203:322 576.46539:257	539.46539:102 574.43781:640	1617.02	1736.17	1606.38	1829.79	1780.85	1805.36	1769.64	1789.29	1653.57	1723.21	443	546	574	446	539	1714.39	1748.17
360	14.178	574.542	574.5415_14.178	Unknown	[M+H]+		0.133	True	null	null	null	null	null	null	999	False	False	False		False	False	null	null	null	null	null	null	null	22.38	Lipidomics_pos_CON_01	574.53833:1002 575.54168:531 576.54504:185	132.90623:50 255.23219:303 269.24881:214 539.47723:54 574.53912:814	1644.68	1897.87	1693.62	2034.04	2095.74	1333.93	1746.43	1908.93	1183.93	1700	1002	1048	920	759	968	1873.51	1574.89
361	17.98	575.5	575.50006_17.98	Unknown	[M+H]+		0.067	True	null	null	null	null	null	null	999	False	False	False		False	False	null	null	null	null	null	null	null	23.33	Lipidomics_pos_AH_04	575.50006:1976 576.50341:1066 577.50677:1573	85.09921:67 135.10892:17 223.2018:31 247.24281:32 575.50122:2812	2682.98	2931.91	2193.62	4204.26	3570.21	1380.36	1510.71	1537.5	1346.43	1382.14	1084	1091	986	805	844	3116.65	1431.43
362	18.374	575.5	575.50024_18.374	Unknown	[M+H]+	found in higher mz's MsMs_1635; found in higher mz's MsMs_1756	1	True	null	null	null	null	null	null	999	False	False	False		False	False	null	null	null	null	null	null	null	48.98	Lipidomics_pos_AH_01	575.50018:3474 576.50353:1629 577.50689:4462	81.06991:120 123.11492:58 151.1449:68 247.23569:34 575.40704:48	7391.49	11910.6	5234.04	11553.2	8855.32	2955.36	3633.93	3041.07	2960.71	3466.07	2852	2703	2579	2120	2542	8988.46	3211.52
363	14.035	575.502	575.50171_14.035	Unknown	[M+H-H2O]+	adduct linked to 484_[M+NH4]+	0.267	True	null	null	null	null	null	null	999	False	False	False		False	False	null	null	null	null	null	null	null	16.46	Lipidomics_pos_CON_01	575.50244:1159 576.50579:437 577.50915:448	83.0862:147 575.45972:72	1334.04	2004.26	1497.87	2142.55	1863.83	1530.36	1482.14	1403.57	1410.71	1614.29	1159	1188	1009	988	1097	1768.83	1488.01
364	10.689	575.502	575.50177_10.689	Unknown	[M+H]+		0.267	True	null	null	null	null	null	null	999	False	False	False		False	False	null	null	null	null	null	null	null	29.54	Lipidomics_pos_BL_04	575.50238:1460 576.50573:782 577.50909:212	71.08587:95 575.50378:2229	2765.96	2536.17	2568.09	2948.94	2402.13	2635.71	2496.43	2430.36	2607.14	2544.64	2227	1864	2294	2171	2132	2644.1	2542.88
365	12.194	575.502	575.50238_12.194	Unknown	[M+H]+	similar chromatogram in higher mz_498	0.667	True	null	null	null	null	null	null	999	False	False	False		False	False	null	null	null	null	null	null	null	23.9	Lipidomics_pos_BL_01	575.50433:1005 576.50768:301 577.51104:591	83.08505:73 263.24463:111 575.4635:139	1559.57	1614.89	1574.47	1778.72	2078.72	1794.64	1978.57	1932.14	2532.14	2050	2837	2765	2443	2706	2639	1721.49	2057.54
366	17.181	575.503	575.50299_17.181	Unknown	[M+H]+		0.133	True	null	null	null	null	null	null	999	False	False	False		False	False	null	null	null	null	null	null	null	22.56	Lipidomics_pos_CON_04	575.50201:1540 576.50536:687 577.50872:518	83.08525:140 149.13203:66 237.22177:128 575.43982:283	619.149	589.362	589.362	600	791.489	423.214	421.429	378.571	471.429	414.286	861	828	1517	1540	1616	637.261	421.674
367	13.23	576.475	576.47455_13.23	w/o MS2:Cer 13:2;2O/26:6	[M+H]+		1	True	9.13	576.477	C39H63NO3	Cer_NS	KLKKCVURLKWZJX-UHFFFAOYSA-N	O=C(NC(CO)C(O)C=CCCC=CCCCC)CCCCCCC=CCC=CCC=CCC=CCC=CCC=CCC	530	True	True	False		False	False	null	null	96.8	99.9	null	null	null	151.09	Lipidomics_pos_BL_02	576.47455:14309 577.4779:5275 578.48126:1547	103.07822:35 576.43848:294 576.47205:5099	21078.7	21410.6	21400	21746.8	21648.9	21375	25551.8	23850	23189.3	22505.4	6266	7067	7253	6325	6100	21457.1	23293.7
368	14.508	576.533	576.53265_14.508	w/o MS2:Cer 12:0;2O/23:0	[M+H]+		0.933	True	11.03	576.533	C35H71NO3	Cer_NDS	XNXRMXMQTJYJHU-UHFFFAOYSA-N	O=C(NC(CO)C(O)CCCCCCCCC)CCCCCCCCCCCCCCCCCCCCCC	530	True	True	False		False	False	null	null	77.3	99.9	null	null	null	45.34	Lipidomics_pos_AH_05	576.53265:4731 577.536:2149 578.53936:542	576.48615:27 576.5108:27 576.53107:51	8729.79	7519.15	9178.72	7993.62	10066	5610.71	5782.14	6348.21	6764.29	8417.86	1691	1963	1580	1766	2094	8697.61	6584.96
369	14.957	576.57	576.57037_14.957	Cer 38:1;2O|Cer 16:1;2O/22:0	[M+H-H2O]+		0.4	True	12.09	576.571	C38H75NO3	Cer_NS	RIGQYOKCOHPLTC-UHFFFAOYSA-N	O=C(NC(CO)C(O)C=CCCCCCCCCCCC)CCCCCCCCCCCCCCCCCCCCC	410	True	True	True		False	False	null	null	100	100	50.8	74.4	100	22.67	Lipidomics_pos_CON_03	576.57001:1251 577.57336:576 578.57672:337	224.23737:26 236.23611:426 254.24467:61 340.35489:36 576.51501:214	2229.79	2531.91	2006.38	2495.74	2187.23	2216.07	2246.43	2396.43	2289.29	2387.5	1550	1545	1251	1322	1325	2290.24	2307.3
370	15.456	577.516	577.51617_15.456	RIKEN P-VS1 ID-5423 from Mouse_Plasma_ApoEKO_N_F1DHA	[M+Na]+	ion correlated with 84; ion correlated with 68; ion correlated with 278; ion correlated with 312; ion correlated with 623; adduct linked to 278_[M+H-H2O]+	0.333	True	13.05	577.516		Unknown			430	True	True	True		False	False	null	null	84.9	100	88	75.5	50	24.37	Lipidomics_pos_CON_03	577.51483:1833 578.51818:951 579.52154:4843	560.5163:27 577.51508:4414	206.383	380.851	417.021	376.596	274.468	819.643	996.429	823.214	669.643	1035.71	1872	1615	1833	1644	1751	331.197	868.906
371	18.734	577.516	577.51617_18.734	RIKEN P-VS1 ID-5423 from Mouse_Plasma_ApoEKO_N_F1DHA	[M+H]+	ion correlated with 1786; found in higher mz's MsMs_1764; found in higher mz's MsMs_1646; similar chromatogram in higher mz_1764; similar chromatogram in higher mz_1853; similar chromatogram in higher mz_1675	1	True	13.05	577.516		Unknown			430	True	True	True		False	False	null	null	84.6	99.8	86.9	75.5	50	163.09	Lipidomics_pos_AH_01	577.51611:12002 578.51946:5105 579.52282:1955	149.12669:17 239.23592:40 577.51526:1698	25536.2	39855.3	21768.1	40559.6	31302.1	10855.4	14680.4	11478.6	12262.5	13066.1	13014	11643	13739	12700	11674	31804	12468.6
372	19.104	577.517	577.51697_19.104	RIKEN P-VS1 ID-5423 from Mouse_Plasma_ApoEKO_N_F1DHA	[M+H]+	similar chromatogram in higher mz_457; similar chromatogram in higher mz_689; similar chromatogram in higher mz_1862; found in higher mz's MsMs_1776	0.533	True	13.05	577.516		Unknown			430	True	True	True		False	False	null	null	84.9	99.8	88	75.5	50	55.01	Lipidomics_pos_CON_04	577.51666:4269 578.52001:1997 579.52337:7287	577.5166:613	7057.45	10746.8	7034.04	9272.34	10638.3	2980.36	3746.43	3133.93	3387.5	3739.29	3525	5724	4134	4269	4199	8949.57	3397.92
373	18.369	577.517	577.51703_18.369	RIKEN P-VS1 ID-5423 from Mouse_Plasma_ApoEKO_N_F1DHA	[M+H]+	ion correlated with 296; found in higher mz's MsMs_1635; found in higher mz's MsMs_1756; found in higher mz's MsMs_1480	0.467	True	13.05	577.516		Unknown			430	True	True	True		False	False	null	null	84.5	99.9	86.5	75.5	50	51.78	Lipidomics_pos_CON_02	577.51581:3176 578.51916:1773 579.52252:485	149.13078:17 577.51666:248	8474.47	12912.8	5931.91	13317	9893.62	3683.93	4216.07	3698.21	3637.5	4294.64	3997	3176	3029	2923	3130	10105.5	3905.96
374	11.58	577.518	577.51764_11.58	RIKEN P-VS1 ID-5423 from Mouse_Plasma_ApoEKO_N_F1DHA	[M+H]+	ion correlated with 1567	1	True	13.05	577.516		Unknown			430	True	True	True		False	False	null	null	84.5	100	87.9	75.5	50	116	Lipidomics_pos_AH_04	577.51758:3735 578.52093:1887 579.52429:722	93.0667:21 577.51709:1992	8461.7	7246.81	6446.81	7946.81	6842.55	10126.8	9198.21	8953.57	9726.79	9591.07	10861	13027	13236	12866	11367	7388.94	9519.29
375	14.69	577.518	577.51801_14.69	RIKEN P-VS1 ID-5423 from Mouse_Plasma_ApoEKO_N_F1DHA	[M+H]+	ion correlated with 398; ion correlated with 1397; ion correlated with 548; found in higher mz's MsMs_490	0.8	True	13.05	577.516		Unknown			430	True	True	True		False	False	null	null	84.3	100	88	75.5	50	76.37	Lipidomics_pos_CON_02	577.51801:7432 578.52136:3558 579.52472:1085	577.46539:92	4351.06	4982.98	4223.4	6821.28	5308.51	5525	6067.86	5594.64	5646.43	6275	8058	7432	6142	6817	6891	5137.9	5821.5
376	11.855	577.518	577.51819_11.855	RIKEN P-VS1 ID-5423 from Mouse_Plasma_ApoEKO_N_F1DHA	[M+H]+	similar chromatogram in higher mz_1009; found in higher mz's MsMs_1032	1	True	13.05	577.516		Unknown			430	True	True	True		False	False	null	null	84.6	100	87.6	75.5	50	277.2	Lipidomics_pos_AH_04	577.51709:15215 578.52044:9463 579.5238:1729	239.2189:20 577.51752:1808	27925.5	31342.6	28766	32372.3	27446.8	17169.6	17289.3	17610.7	18692.9	18725	27500	27076	23498	29610	28993	29571	17897.2
377	17.52	577.518	577.51825_17.52	RIKEN P-VS1 ID-5423 from Mouse_Plasma_ApoEKO_N_F1DHA	[M+H]+	ion correlated with 445	0.067	True	13.05	577.516		Unknown			430	True	True	True		False	False	null	null	83.2	99.9	85	75.5	50	20.45	Lipidomics_pos_CON_03	577.51825:1725 578.5216:661 579.52496:433	71.08486:90 189.16431:24 560.54144:42 577.5163:1717	1317.02	1525.53	1059.57	1451.06	1455.32	669.643	766.071	844.643	703.571	876.786	756	837	1725	1239	1109	1361.65	771.763
378	12.999	577.518	577.51849_12.999	RIKEN P-VS1 ID-5423 from Mouse_Plasma_ApoEKO_N_F1DHA	[M+H]+	ion correlated with 827; ion correlated with 518; found in higher mz's MsMs_893; found in higher mz's MsMs_797	1	True	13.05	577.516		Unknown			430	True	True	True		False	False	null	null	85	100	88	75.5	50	204.01	Lipidomics_pos_AH_04	577.51617:5932 578.51952:3493 579.52288:633	577.51715:731	12678.7	12708.5	12697.9	12621.3	13606.4	10192.9	12178.6	12903.6	12621.4	12710.7	26032	22461	25230	25127	22080	12862	12121.2
379	1.94	578.272	578.27179_1.94	Unknown	[M+H]+		0.467	True	null	null	null	null	null	null	999	False	False	False		False	False	null	null	null	null	null	null	null	36.04	Lipidomics_pos_AH_02	578.27179:1586 579.27514:405 580.2785:148	93.06894:29 144.04036:118 157.04977:712 166.09714:58 197.08006:42 211.09515:116 213.10936:26 240.09868:80 279.12277:39 337.17007:34 353.12177:229 364.11597:310 437.25424:30 578.36053:148	3114.89	3374.47	3276.6	3657.45	3323.4	1732.14	1864.29	1798.21	1269.64	1541.07	1430	1536	1475	1491	1309	3349.63	1641.34
380	13.632	578.492	578.492_13.632	w/o MS2:Cer 13:1;2O/26:6	[M+H]+		0.333	True	9.67	578.493	C39H65NO3	Cer_NS	RZKIQIHOBLAPDJ-UHFFFAOYSA-N	O=C(NC(CO)C(O)C=CCCCCCCCC)CCCCCCC=CCC=CCC=CCC=CCC=CCC=CCC	530	True	True	False		False	False	null	null	99.4	99.9	null	null	null	48.28	Lipidomics_pos_BL_04	578.492:2831 579.49535:1551 580.49871:629	561.31311:18 578.4892:2359	842.553	1074.47	951.064	1123.4	836.17	3653.57	3855.36	4528.57	5055.36	4407.14	295	0	193	190	0	965.319	4299.87
381	13.821	579.437	579.43689_13.821	w/o MS2:SL 12:1;O/18:0;O	[M+H]+		1	True	7.64	579.44	C30H59NO6S	SL	RVIKRDHQZKUVIK-UHFFFAOYSA-N	O=C(N(CC(O)C=CCCCCCCC)CS(=O)(=O)O)C(O)CCCCCCCCCCCCCCCC	530	True	True	False		False	False	null	null	96.2	99.8	null	null	null	33.84	Lipidomics_pos_BL_02	579.43689:2903 580.44024:1105 581.4436:345	367.20184:108	3623.4	3589.36	3793.62	3951.06	4095.74	4617.86	5183.93	4426.79	4241.07	4941.07	2392	1963	2062	1532	1907	3810.82	4682.14
382	15.43	579.533	579.53265_15.43	w/o MS2:RIKEN P-VS1 ID-5453 from Mouse_Macrophage_WT_N_F1AA	[M+H-H2O]+	ion correlated with 501; ion correlated with 563; similar chromatogram in higher mz_563; similar chromatogram in higher mz_606; adduct linked to 501_[M+Na]+; similar chromatogram in higher mz_841	0.867	True	12.89	579.534		Unknown			530	True	True	False		False	False	null	null	99.1	100	null	null	null	39.4	Lipidomics_pos_CON_03	579.53265:4042 580.536:1871 581.53936:1618	579.48322:27	2082.98	2504.26	2214.89	3155.32	3025.53	2516.07	3250	2605.36	2317.86	3110.71	3965	3934	4042	3706	3989	2596.25	2760.27
383	19.106	579.533	579.53278_19.106	w/o MS2:RIKEN P-VS1 ID-5453 from Mouse_Macrophage_WT_N_F1AA	[M+H]+	ion correlated with 457; found in higher mz's MsMs_1776; found in higher mz's MsMs_1655	1	True	12.89	579.534		Unknown			530	True	True	False		False	False	null	null	99.3	99.8	null	null	null	67.29	Lipidomics_pos_CON_02	579.53278:7096 580.53613:3903 581.53949:1267	579.53516:572	10019.1	14751.1	8882.98	13987.2	13676.6	3916.07	5353.57	4641.07	4353.57	5612.5	5191	7096	5774	5766	6215	12263.1	4775.13
384	19.444	579.533	579.53296_19.444	w/o MS2:RIKEN P-VS1 ID-5453 from Mouse_Macrophage_WT_N_F1AA	[M+H]+		0.067	False	12.89	579.534		Unknown			530	True	True	False		False	False	null	null	99.3	99.8	null	null	null	31.74	Lipidomics_pos_CON_01	579.53296:1821 580.53631:833 581.53967:289		3246.81	3623.4	2629.79	3795.74	3919.15	1705.36	1603.57	1805.36	1557.14	2001.79	1821	1593	1412	1699	1699	3442.58	1734.35
385	12.795	579.541	579.54083_12.795	w/o MS2:RIKEN P-VS1 ID-5453 from Mouse_Macrophage_WT_N_F1AA	[M+H]+		0.067	False	12.89	579.534		Unknown			530	True	True	False		False	False	null	null	80.1	100	null	null	null	19.51	Lipidomics_pos_CON_05	579.54083:1276 580.54418:0 581.54754:0		68.0851	331.915	0	476.596	285.106	1016.07	598.214	1125	632.143	1112.5	398	1149	1093	1356	1276	231.702	896.853
386	3.537	580.301	580.30078_3.537	w/o MS2:PE 23:4	[M+H]+		0.133	True	5.82	580.301	C28H48NO8P	PE	NWEVRCPZBIGZLD-UHFFFAOYSA-N	O=C(OCC(OC(=O)CCCC=CCC=CCC=CCC=CCC)COP(=O)(O)OCCN)CCCCC	530	True	True	False		False	False	null	null	74.8	100	null	null	null	45.74	Lipidomics_pos_AH_05	580.30078:1091 581.30413:315 582.30749:94	120.9642:86 164.00748:168 417.30185:80 537.25891:421	1531.91	2165.96	1406.38	2059.57	2321.28	617.857	680.357	696.429	633.929	855.357	496	595	523	506	487	1897.23	696.942
387	3.274	580.361	580.36066_3.274	w/o MS2:SL 12:1;O/20:5;O	[M+H]+		0.067	True	6.33	580.367	C32H53NO6S	SL	SSXMVJHMGFOVKQ-UHFFFAOYSA-N	O=C(N(CC(O)C=CCCCCCCC)CS(=O)(=O)O)C(O)CCC=CCC=CCC=CCC=CCC=CCC	530	True	True	False		False	False	null	null	87.8	100	null	null	null	18.55	Lipidomics_pos_CON_01	580.36066:1140 581.36401:298 582.36737:59	184.07295:985	1842.55	1861.7	2002.13	2068.09	1668.09	1019.64	992.857	1042.86	1057.14	1262.5	1140	1007	997	1099	1111	1888.64	1075.25
388	3.165	582.319	582.31897_3.165	w/o MS2:PE 23:3	[M+H]+		0.333	True	6.12	582.317	C28H50NO8P	PE	ZTGPLCFBAPRDSS-UHFFFAOYSA-N	O=C(OCC(OC(=O)CCCCCCC=CCC=CCC=CCC)COP(=O)(O)OCCN)CCCCC	530	True	True	False		False	False	null	null	67.2	100	null	null	null	51.37	Lipidomics_pos_CON_02	582.31897:1822 583.32232:745 584.32568:172	69.069:27 81.06998:78 93.06956:130 117.06993:66 133.10123:97 149.131:37 185.07462:33 197.13297:39 279.20853:20 325.21164:56 441.25598:66	1161.7	1306.38	957.447	1404.26	1259.57	569.643	939.286	932.143	864.286	941.071	1732	1822	1638	1548	1662	1218.03	849.129
389	13.232	582.557	582.5567_13.232	Unknown	[M+H]+		0.067	True	null	null	null	null	null	null	999	False	False	False		False	False	null	null	null	null	null	null	null	22.75	Lipidomics_pos_BL_01	582.5567:1046 583.56005:474 584.56341:155	237.22246:51 264.26834:353 309.27426:52 329.27206:172 490.49994:174 520.50684:1436 538.5202:256 582.53699:168	1400	1506.38	1097.87	1761.7	1778.72	1867.86	1696.43	1653.57	1678.57	1560.71	380	509	459	351	365	1508.94	1691.63
390	12.519	583.506	583.50635_12.519	w/o MS2:NAGly 8:0;O(FA 24:1)	[M+H]+	found in higher mz's MsMs_823; similar chromatogram in higher mz_925; similar chromatogram in higher mz_932	0.933	True	8.75	583.504	C34H63NO5	NAGly	CZQCSSADNPIWJP-UHFFFAOYSA-N	O=C(O)CNC(=O)CCCC(OC(=O)CCCCCCCCCCCC=CCCCCCCCCCC)CCC	530	True	True	False		False	False	null	null	98.6	99.9	null	null	null	58.94	Lipidomics_pos_CON_05	583.50635:3988 584.5097:1491 585.51306:531	79.05325:66 119.0856:60 131.08473:55 149.13062:25 179.18088:59 235.24236:54 269.22928:54 565.4884:55 583.508:1426	3544.68	4440.43	4006.38	3934.04	3804.26	1817.86	2067.86	1926.79	1814.29	2560.71	3607	3831	3303	3429	3988	3946.14	2037.3
391	16.136	583.565	583.56512_16.136	Unknown	[M+H]+	ion correlated with 339; ion correlated with 456; ion correlated with 505; adduct linked to 339_[M+H-H2O]+	0.333	True	null	null	null	null	null	null	999	False	False	False		False	False	null	null	null	null	null	null	null	48.01	Lipidomics_pos_CON_01	583.56512:2098 584.56847:1132 585.57183:300	99.11652:37 226.95126:30 311.25735:22 565.5177:50 583.45166:66	176.596	229.787	168.085	163.83	206.383	489.286	555.357	492.857	394.643	651.786	2098	1737	1880	1835	1989	189.043	517.009
392	4.019	584.334	584.33386_4.019	PE 25:5	[M+H]+		0.267	True	5.96	584.335	C30H50NO8P	PE	BJANSAKOOSHHSU-UHFFFAOYSA-N	O=C(OCC(OC(=O)CCC=CCC=CCC=CCC=CCC=CCC)COP(=O)(O)OCCN)CCCCC	420	True	True	True		False	False	null	null	88.9	100	63	63.1	100	24.44	Lipidomics_pos_CON_02	584.33533:1316 585.33868:394 586.34204:143	71.08393:27 91.05476:29 101.02673:36 121.09967:35 195.0657:20 243.21066:61 371.18512:22 443.31531:1505 584.33301:569	1051.06	1023.4	778.723	1065.96	1053.19	521.429	523.214	592.857	466.071	669.643	1415	1316	1338	1139	1174	994.495	554.71
393	13.919	584.523	584.52252_13.919	DG 32:1|DG 14:0_18:1	[M+NH4]+		1	True	10.52	584.525	C35H66O5	DG	XEQQGHISHUGMIP-UHFFFAOYSA-N	O=C(OCC(OC(=O)CCCCCCCC=CCCCCCCCC)CO)CCCCCCCCCCCCC	410	True	True	True		False	False	null	null	100	99.9	58	88.8	100	42.73	Lipidomics_pos_BL_05	584.52222:2352 585.52557:1022 586.52893:254	83.0832:60 109.1021:50 285.24176:1199 311.25784:1051 339.28918:1305 549.43994:231 584.46185:330	2597.87	3131.91	2665.96	3768.09	3385.11	3266.07	3792.86	3571.43	3132.14	4200	3196	3231	2942	3102	2887	3110.35	3592.41
394	12.333	585.354	585.354_12.333	Unknown	[M+H]+		0.533	True	null	null	null	null	null	null	999	False	False	False		False	False	null	null	null	null	null	null	null	22.51	Lipidomics_pos_AH_03	585.35455:1024 586.3579:299 587.36126:152	177.11366:47 568.3338:180 585.35266:1428 585.44708:55	2000	1795.74	2178.72	2161.7	2672.34	3010.71	2898.21	3167.86	2969.64	3010.71	807	795	788	755	828	2161.86	3011.38
395	13.962	585.527	585.52728_13.962	w/o MS2:RIKEN P-VS1 ID-5539 from Mouse_Macrophage_WT_N_F1AA	[M+H]+		0.067	False	6.82	585.532		Unknown			530	True	True	False		False	False	null	null	91	99.7	null	null	null	21.34	Lipidomics_pos_CON_05	585.52728:1249 586.53063:329 587.53399:246		1055.32	1287.23	1370.21	1436.17	1559.57	1412.5	1683.93	1396.43	1271.43	1744.64	1627	1317	1335	1368	1249	1341.09	1501.87
396	2.65	586.29	586.2901_2.65	Unknown	[M+H]+		0.067	True	null	null	null	null	null	null	999	False	False	False		False	False	null	null	null	null	null	null	null	27	Lipidomics_pos_AH_04	586.2901:1177 587.29345:455 588.29681:129	365.26642:34 527.21625:596	1646.81	2023.4	1487.23	2504.26	2080.85	458.929	592.857	548.214	432.143	714.286	497	606	645	538	522	1948.4	549.487
397	12.195	586.437	586.43738_12.195	w/o MS2:NAGlySer 8:0;O(FA 18:1)	[M+H]+		1	True	7.38	586.443	C31H56N2O7	NAGlySer	FAKXYFDLZCOCBY-UHFFFAOYSA-N	O=C(OC(CCC)CCCC(=O)NCC(=O)NC(C(=O)O)CO)CCCCCCCC=CCCCCCCCC	530	True	True	False		False	False	null	null	90.5	99.9	null	null	null	41.59	Lipidomics_pos_BL_04	586.43738:4863 587.44073:2102 588.44409:404	418.25107:235 530.37341:1058 586.43396:4084	4634.04	3868.09	3314.89	4865.96	3919.15	3264.29	3532.14	6591.07	8683.93	6155.36	1934	1510	1393	1695	1673	4119.97	5645.27
398	14.666	586.54	586.53967_14.666	DG 32:0|DG 16:0_16:0	[M+NH4]+	ion correlated with 306; ion correlated with 375; ion correlated with 1397; adduct linked to 306_[M+H-H2O]+; adduct linked to 405_[M+Na]+	1	True	11.52	586.541	C35H68O5	DG	JEJLGIQLPYYGEE-UHFFFAOYSA-N	O=C(OCC(OC(=O)CCCCCCCCCCCCCCC)CO)CCCCCCCCCCCCCCC	410	True	True	True		False	False	null	null	100	100	78.5	83.8	100	81.42	Lipidomics_pos_BL_02	586.53986:3772 587.54321:1937 588.54657:891	239.23804:69 285.24246:71 313.27283:1866 341.30579:80 518.26483:9 551.50238:1719 569.47766:20 569.5119:33 586.4718:69	3668.09	4793.62	3763.83	4765.96	4263.83	5326.79	6735.71	5644.64	4971.43	6664.29	7432	6240	6129	5895	6445	4251.33	5869.11
399	3.461	588.306	588.30609_3.461	Unknown	[M+H]+		0.467	True	null	null	null	null	null	null	999	False	False	False		False	False	null	null	null	null	null	null	null	90.08	Lipidomics_pos_AH_01	588.30615:2509 589.3095:680 590.31286:285	529.23383:664	5338.3	6663.83	5861.7	7236.17	6372.34	1769.64	2014.29	1780.36	1550	2332.14	2522	2837	2713	2718	2250	6294.39	1889.29
400	14.16	588.531	588.53125_14.16	RIKEN P-VS1 ID-5576 from Mouse_Muscle_fads2KO_N_Ctr	[M+H]+	adduct linked to 295_[M+H-H2O]+	0.933	True	10.53	588.532		Unknown			430	True	True	True		False	False	null	null	90.4	99.9	88	75	100	44.57	Lipidomics_pos_BL_05	588.53162:2259 589.53497:919 590.53833:262	588.48883:44	2378.72	2817.02	1902.13	2725.53	2576.6	3564.29	3919.64	3830.36	4212.5	4033.93	2163	1896	2013	1882	1900	2479.97	3912.3
401	6.336	589.407	589.4068_6.336	Unknown	[M+H]+		0.133	True	null	null	null	null	null	null	999	False	False	False		False	False	null	null	null	null	null	null	null	24.46	Lipidomics_pos_BL_02	589.40674:1113 590.41009:390 591.41345:241	589.40723:2380	2076.6	1802.13	1840.43	1634.04	1242.55	1419.64	1987.5	1253.57	1285.71	982.143	909	1391	690	656	750	1719.15	1385.62
402	13.948	589.48	589.47955_13.948	DG 32:1	[M+Na]+		0.933	True	10.41	589.48	C35H66O5	DG	OGUHKUNADZDIPN-UHFFFAOYSA-N	O=C(OCC(OC(=O)CCCCCCCCCCCC=CCCCCCCCCCC)CO)CCCCCCC	420	True	True	True		False	False	null	null	100	99.9	75	75	100	34.49	Lipidomics_pos_AH_02	589.48102:1213 590.48437:455 591.48773:103	589.48181:2584	2144.68	2580.85	2436.17	3300	2610.64	2657.14	3296.43	2873.21	2516.07	3164.29	2616	2185	1903	1985	1720	2614.79	2901.09
403	19.308	589.553	589.55316_19.308	Unknown	[M+H]+	found in higher mz's MsMs_1707	0.267	True	null	null	null	null	null	null	999	False	False	False		False	False	null	null	null	null	null	null	null	26.88	Lipidomics_pos_AH_01	589.55237:1304 590.55572:713 591.55908:454	81.07083:29 95.0855:56 165.16177:10 453.84818:11 589.28351:26 589.55286:1589	2774.47	2897.87	1625.53	3227.66	2870.21	460.714	642.857	700	666.071	639.286	900	717	783	646	795	2679.23	621.942
404	14.344	589.555	589.55457_14.344	Unknown	[M+H]+	ion correlated with 1066; ion correlated with 1780; found in higher mz's MsMs_853	0.333	True	null	null	null	null	null	null	999	False	False	False		False	False	null	null	null	null	null	null	null	31.76	Lipidomics_pos_CON_01	589.5528:1680 590.55615:832 591.55951:166	93.06995:82 121.10107:67 219.21362:74 279.26236:38 284.26724:82 571.54504:71 589.53436:624	1014.89	868.085	855.319	804.255	1017.02	600	560.714	616.071	614.286	680.357	1680	1533	1500	1688	1778	911.835	614.308
405	14.666	591.495	591.49512_14.666	DG 32:0	[M+Na]+	ion correlated with 306; adduct linked to 398_[M+NH4]+; adduct linked to 306_[M+H-H2O]+	1	True	11.46	591.496	C35H68O5	DG	IMXMTGVRZTUYOM-UHFFFAOYSA-N	O=C(OCC(OC(=O)CCCCCCC)CO)CCCCCCCCCCCCCCCCCCCCCCC	420	True	True	True		False	False	null	null	100	99.9	75	75	100	47.37	Lipidomics_pos_CON_04	591.49481:4965 592.49816:2017 593.50152:505	83.08255:50 313.27335:52 591.4928:8851	3412.77	3834.04	3336.17	4251.06	4212.77	4835.71	5862.5	4985.71	4639.29	5678.57	5626	5227	4805	4965	4803	3809.89	5200.49
406	18.903	591.533	591.53253_18.903	Unknown	[M+H]+	found in higher mz's MsMs_1826; similar chromatogram in higher mz_1987	0.2	True	null	null	null	null	null	null	999	False	False	False		False	False	null	null	null	null	null	null	null	21.96	Lipidomics_pos_AH_01	591.5296:1384 592.53295:723 593.53631:377	149.13182:53 219.20921:89 591.53082:1920	2944.68	2519.15	2038.3	3608.51	2687.23	939.286	1260.71	1316.07	1058.93	1289.29	1244	1372	1257	1121	1112	2760.29	1173.12
407	12.328	591.533	591.53302_12.328	Unknown	[M+H]+		0.267	True	null	null	null	null	null	null	999	False	False	False		False	False	null	null	null	null	null	null	null	32.67	Lipidomics_pos_CON_01	591.53345:2230 592.5368:1668 593.54016:321	95.08509:42	1940.43	1387.23	2085.11	2057.45	2014.89	1335.71	1317.86	1314.29	1260.71	1408.93	2230	2428	1876	2583	2144	1896.84	1327.7
408	12.082	591.533	591.53302_12.082	Unknown	[M+H]+		0.067	True	null	null	null	null	null	null	999	False	False	False		False	False	null	null	null	null	null	null	null	29.68	Lipidomics_pos_CON_05	591.53302:2029 592.53637:1048 593.53973:342	97.10339:61 442.32187:83 591.53308:2782	1448.94	1702.13	1625.53	1740.43	1514.89	1653.57	1798.21	1932.14	1766.07	1862.5	1482	1722	2065	1620	2029	1606.44	1802.43
409	13.45	591.533	591.53326_13.45	Unknown	[M+H]+		0.4	True	null	null	null	null	null	null	999	False	False	False		False	False	null	null	null	null	null	null	null	32.36	Lipidomics_pos_AH_01	591.53259:1174 592.53594:916 593.5393:564	97.09956:94 591.43268:312	2497.87	2127.66	1861.7	2104.26	1917.02	1683.93	1635.71	1342.86	1655.36	1721.43	2639	2318	2278	2793	2790	2101.6	1608.08
410	19.65	591.569	591.56854_19.65	Unknown	[M+H]+	ion correlated with 1589; found in higher mz's MsMs_1720; found in higher mz's MsMs_1827	0.667	True	null	null	null	null	null	null	999	False	False	False		False	False	null	null	null	null	null	null	null	26.37	Lipidomics_pos_AH_01	591.56903:2128 592.57238:1257 593.57574:494	99.11684:71 167.18245:13 292.23389:13 591.56873:2480	4527.66	6234.04	3665.96	6421.28	4976.6	803.571	878.571	821.429	819.643	969.643	2275	1543	1735	1578	1827	5165.11	858.393
411	13.431	593.417	593.41681_13.431	DG 33:6	[M+Na]+		0.133	True	8.5	593.418	C36H58O5	DG	VMSYANQNYIAKRV-UHFFFAOYSA-N	O=C(OCC(OC(=O)CCCCC=CCC=CCC=CCC=CCC=CCC=CCC)CO)CCCCCCCC	420	True	True	True		False	False	null	null	100	99.9	66.6	75	100	22.03	Lipidomics_pos_AH_04	593.41681:1630 594.42016:478 595.42352:0	593.25439:55 593.41803:2309 593.51782:116 593.53571:122	1195.74	3114.89	1365.96	3468.09	2263.83	1233.93	1457.14	1083.93	966.071	955.357	362	766	480	282	418	2281.68	1139.58
412	14.248	593.453	593.45331_14.248	w/o MS2:SL 12:1;O/19:0;O	[M+H]+		0.4	True	7.94	593.456	C31H61NO6S	SL	GOKYMVJWAYZSHR-UHFFFAOYSA-N	O=C(N(CC(O)C=CCCCCCCC)CS(=O)(=O)O)C(O)CCCCCCCCCCCCCCCCC	530	True	True	False		False	False	null	null	97.8	99.8	null	null	null	21.05	Lipidomics_pos_CON_02	593.45331:1752 594.45666:728 595.46002:214	575.54089:61 593.45697:1761	2195.74	2819.15	2882.98	3057.45	3287.23	2403.57	2730.36	2587.5	2301.79	2646.43	1700	1752	1496	1226	1387	2848.32	2533.91
413	15.456	593.49	593.49005_15.456	w/o MS2:NAGly 9:0;O(FA 24:3)	[M+H]+	ion correlated with 334; ion correlated with 370	0.333	True	8.66	593.489	C35H61NO5	NAGly	HNLKURQEJDYYHQ-UHFFFAOYSA-N	O=C(O)CNC(=O)CCCC(OC(=O)CCCCCCCCC=CCC=CCC=CCCCCCCC)CCCC	530	True	True	False		False	False	null	null	99.4	99.8	null	null	null	18.4	Lipidomics_pos_CON_01	593.49005:1488 594.4934:749 595.49676:202	309.32611:435 593.52106:1278	182.979	257.447	221.277	244.681	93.617	569.643	571.429	505.357	576.786	642.857	1488	1240	1392	1254	1238	199.947	573.147
414	15.439	593.596	593.59631_15.439	Unknown	[M+H]+		0.8	True	null	null	null	null	null	null	999	False	False	False		False	False	null	null	null	null	null	null	null	24.81	Lipidomics_pos_AH_01	593.59583:1137 594.59918:550 595.60254:111	89.0593:13 282.2778:17 310.31012:686 540.30511:11 593.24353:20 593.53845:134	2419.15	2742.55	2361.7	2744.68	5214.89	1855.36	1980.36	2682.14	2998.21	2883.93	1122	978	955	1089	1244	3096.76	2480.11
415	2.513	594.316	594.31592_2.513	PC 21:4	[M+Na]+	adduct linked to 354_[M+H]+	0.333	True	5.31	594.317	C29H50NO8P	PC	LWCTVICDBSAJJK-UHFFFAOYSA-N	O=C(OCC(OC(=O)CC=CCC=CCC=CCC=CCC)COP(=O)([O-])OCC[N+](C)(C)C)CCCCC	420	True	True	True		False	False	null	null	96.2	100	99.3	82.7	100	99.16	Lipidomics_pos_AH_03	594.31531:3120 595.31866:1400 596.32202:1464	411.22827:135 535.22272:96 594.28912:284	6136.17	7338.3	6638.3	9053.19	7897.87	914.286	1003.57	1078.57	987.5	1094.64	636	648	576	512	469	7412.79	1015.62
416	3.386	594.376	594.37598_3.386	RIKEN P-VS1 ID-5679 from Mouse_Macrophage_WT_N_F1AA	[M+H]+		0.6	True	6.16	594.38		Unknown			430	True	True	True		False	False	null	null	82	100	71.5	71.9	100	40.91	Lipidomics_pos_AH_01	594.37543:2306 595.37878:827 596.38214:229	184.07315:2994 411.30307:41 594.37512:3742	4906.38	5468.09	4644.68	5265.96	4731.91	1776.79	1725	1733.93	1591.07	1894.64	1450	1348	1406	1407	1207	5003.59	1744.64
417	14.957	594.581	594.58148_14.957	Cer 38:1;2O|Cer 18:1;2O/20:0	[M+H]+		0.667	True	12.05	594.582	C38H75NO3	Cer_NS	XWBWIAOWSABHFI-UHFFFAOYSA-N	O=C(NC(CO)C(O)C=CCCCCCCCCCCCCC)CCCCCCCCCCCCCCCCCCC	410	True	True	True		False	False	null	null	100	100	88.1	72.8	100	23.22	Lipidomics_pos_BL_05	594.58014:1326 595.58349:870 596.58685:235	156.11533:13 224.23894:62 264.26862:1106 282.27927:252 546.55713:39 558.55847:232 577.57465:41 594.58215:97	1872.34	2257.45	1655.32	2406.38	2021.28	1796.43	2221.43	1996.43	1944.64	2367.86	1616	1310	1127	1206	1308	2042.34	2065.45
418	14.691	595.529	595.52948_14.691	Unknown	[M+H]+	adduct linked to 490_[M+NH4]+; found in higher mz's MsMs_490	0.267	True	null	null	null	null	null	null	999	False	False	False		False	False	null	null	null	null	null	null	null	33.68	Lipidomics_pos_CON_01	595.52948:1688 596.53283:811 597.53619:329	247.23868:109 313.27237:314 339.29962:72 595.54871:354	840.426	982.979	1008.51	1480.85	1336.17	1262.5	1494.64	1221.43	1171.43	1260.71	1688	1454	1591	1514	1322	1129.57	1282.23
419	1.879	596.318	596.31812_1.879	Unknown	[M+H]+	ion correlated with 348	0.333	True	null	null	null	null	null	null	999	False	False	False		False	False	null	null	null	null	null	null	null	46.14	Lipidomics_pos_AH_01	596.31927:1624 597.32262:811 598.32598:118	156.11105:37 286.10648:26 310.18079:87 396.17697:83 440.20334:112 451.23175:457 496.22748:27	3455.32	3248.94	3251.06	3580.85	3387.23	848.214	1046.43	882.143	671.429	896.429	630	548	683	543	512	3384.18	869.241
420	2.361	596.334	596.33423_2.361	w/o MS2:PC 21:3	[M+H]+		1	True	5.64	596.332	C29H52NO8P	PC	UDSRKVWUBDBOQF-UHFFFAOYSA-N	O=C(OCC(OC(=O)CCCCC=CCC=CCC=CCC)COP(=O)([O-])OCC[N+](C)(C)C)CCCCC	530	True	True	False		False	False	null	null	98.7	99.9	null	null	null	150.36	Lipidomics_pos_AH_04	596.33423:11113 597.33758:5104 598.34094:4257	125.00227:117	17631.9	20387.2	15506.4	23644.7	20459.6	5598.21	5273.21	5723.21	5250	6517.86	3432	3169	3303	3040	3019	19525.7	5672.03
421	7.965	596.509	596.50934_7.965	w/o MS2:Cer 13:2;2O/24:2	[M+H]+		1	True	9.84	596.501	C37H67NO3	Cer_NS	BRGBOZOZESFUAM-UHFFFAOYSA-N	O=C(NC(CO)C(O)C=CCCC=CCCCC)CCCCCCCCCCCC=CCC=CCCCCCCC	530	True	True	False		False	False	null	null	68.8	100	null	null	null	37.12	Lipidomics_pos_CON_02	596.50934:3132 597.51269:1271 598.51605:238	69.07:6 87.04307:5 127.14762:16 133.08604:59 161.11777:8 186.22008:3 233.17422:6 283.26312:3 329.30521:28 373.33176:4 505.405:3 579.48291:64 596.50916:2022	4844.68	4276.6	3425.53	3804.26	2765.96	2903.57	4057.14	3210.71	2657.14	2387.5	2016	3132	1742	1450	1749	3823.88	3043.19
422	15.277	596.597	596.59668_15.277	w/o MS2:Cer 18:0;2O/20:0	[M+H]+		0.133	True	12.48	596.598	C38H77NO3	Cer_NDS	ZWAUSWHRQBSECP-UHFFFAOYSA-N	O=C(NC(CO)C(O)CCCCCCCCCCCCCCC)CCCCCCCCCCCCCCCCCCC	530	True	True	False		False	False	null	null	62.8	100	null	null	null	25.87	Lipidomics_pos_BL_03	596.59668:1155 597.60003:690 598.60339:228	81.07082:36 266.27942:31 284.29526:144 561.55511:69 596.56104:90	834.043	1042.55	861.702	912.766	1021.28	1694.64	1891.07	2062.5	1710.71	1589.29	639	557	526	476	592	934.122	1789.51
423	2.288	598.335	598.33484_2.288	Unknown	[M+H]+		0.933	True	null	null	null	null	null	null	999	False	False	False		False	False	null	null	null	null	null	null	null	125.19	Lipidomics_pos_AH_01	598.33484:5634 599.33819:1554 600.34155:432	184.0563:42	11987.2	11140.4	11687.2	11978.7	11310.6	3169.64	3217.86	2578.57	2046.43	3087.5	3546	3205	3909	3068	2804	11621	2819.98
424	2.623	598.349	598.34943_2.623	w/o MS2:PE 6:0_20:5	[M+H]+		1	True	6.08	598.35	C31H52NO8P	PE	PVRLHKQNVSCGHS-UHFFFAOYSA-N	O=C(OCC(OC(=O)CCCC=CCC=CCC=CCC=CCC=CCC)COP(=O)(O)OCCN)CCCCC	530	True	True	False		False	False	null	null	99.7	99.9	null	null	null	130.86	Lipidomics_pos_AH_04	598.34943:9857 599.35278:3908 600.35614:803	184.05827:77	16014.9	18223.4	15144.7	20972.3	19470.2	2753.57	2782.14	2755.36	2726.79	3141.07	1876	1734	1693	1547	1531	17965.3	2831.94
425	13.498	598.503	598.5033_13.498	w/o MS2:TG 8:0_8:0_16:1	[M+H]+		0.133	True	9.01	598.504	C35H64O6	TG	JXWVAHOPZLYETN-UHFFFAOYSA-N	O=C(OCC(OC(=O)CCCCCCC)COC(=O)CCCCCCCC=CCCCCCC)CCCCCCC	530	True	True	False		False	False	null	null	99.8	99.9	null	null	null	40.7	Lipidomics_pos_AH_02	598.5033:2045 599.50665:665 600.51001:387	265.25467:120 381.3024:203 465.3942:164	1217.02	4351.06	1010.64	3904.26	2087.23	1146.43	1323.21	1119.64	1010.71	1183.93	593	963	590	466	849	2514.28	1157.1
426	14.294	598.539	598.53925_14.294	w/o MS2:Cer 12:1;3O/24:0;(2OH)	[M+H]+		0.333	True	9.41	598.541	C36H71NO5	Cer_AP	NAMYDFHOBCPBJV-UHFFFAOYSA-N	O=C(NC(CO)C(O)C(O)CCCC=CCCC)C(O)CCCCCCCCCCCCCCCCCCCCCC	530	True	True	False		False	False	null	null	99.4	99.9	null	null	null	26.36	Lipidomics_pos_CON_02	598.53925:1518 599.5426:729 600.54596:0	95.08592:177 285.24576:70 299.2587:476 383.31912:89	1461.7	1927.66	1476.6	2063.83	1806.38	1489.29	1623.21	1442.86	1333.93	1751.79	1406	1518	1428	1171	1197	1747.47	1528.5
427	2.18	599.338	599.33789_2.18	Unknown	[M+H]+		0.067	False	null	null	null	null	null	null	999	False	False	False		False	False	null	null	null	null	null	null	null	32.28	Lipidomics_pos_AH_04	599.33789:1613 600.34124:334 601.3446:0		2814.89	3402.13	2985.11	3431.91	3274.47	1007.14	964.286	800	651.786	751.786	947	846	1082	910	753	3182.15	834.955
428	11.979	599.502	599.50171_11.979	Unknown	[M+H]+	similar chromatogram in higher mz_895; found in higher mz's MsMs_895	1	True	null	null	null	null	null	null	999	False	False	False		False	False	null	null	null	null	null	null	null	64.12	Lipidomics_pos_AH_01	599.50476:1531 600.50811:564 601.51147:336	93.06897:50 269.22516:72	3257.45	3842.55	3404.26	3457.45	3576.6	3933.93	3891.07	3617.86	3462.5	4260.71	5868	6058	7434	5966	6648	3507.45	3833.01
429	10.526	599.502	599.50232_10.526	Unknown	[M+H]+	similar chromatogram in higher mz_1758; found in higher mz's MsMs_1758; similar chromatogram in higher mz_820; found in higher mz's MsMs_1687	1	True	null	null	null	null	null	null	999	False	False	False		False	False	null	null	null	null	null	null	null	82.93	Lipidomics_pos_AH_01	599.5025:3498 600.50585:1993 601.50921:427	95.08533:25 203.17767:32	7442.55	8510.64	7397.87	8776.6	7619.15	4321.43	4432.14	5537.5	4610.71	5076.79	6333	5863	7546	7463	6461	7950	4795.51
430	3.306	600.365	600.36548_3.306	w/o MS2:PC 6:0_17:4	[M+H]+		1	True	5.68	600.366	C31H54NO8P	PC	BIACDUXATIPRSS-UHFFFAOYSA-N	O=C(OCC(OC(=O)CCCC=CCC=CCC=CCC=CCC)COP(=O)([O-])OCC[N+](C)(C)C)CCCCC	530	True	True	False		False	False	null	null	73.7	100	null	null	null	110.32	Lipidomics_pos_AH_04	600.36548:14438 601.36883:6086 602.37219:1054	85.1004:65 124.9988:39 133.08595:152 184.07361:4787 583.41492:53 583.44055:420	24668.1	28561.7	23155.3	30719.1	29870.2	3001.79	3176.79	3275	3026.79	3323.21	1844	1857	1791	1527	1902	27395.1	3160.62
431	3.402	600.467	600.46735_3.402	w/o MS2:SL 12:1;O/22:1	[M+H]+	similar chromatogram in higher mz_578	0.8	True	8.51	600.466	C34H65NO5S	SL	QPJMAXBIDFCJJO-UHFFFAOYSA-N	O=C(N(CC(O)C=CCCCCCCC)CS(=O)(=O)O)CCCCCCCCCCCC=CCCCCCCCC	530	True	True	False		False	False	null	null	98.9	99.9	null	null	null	25.78	Lipidomics_pos_CON_02	600.46735:2614 601.4707:1186 602.47406:326	89.05918:49 133.0845:59 600.46796:210	2397.87	3174.47	3270.21	2287.23	2125.53	2458.93	3926.79	3346.43	1882.14	1866.07	1739	2614	2060	1575	1399	2650.9	2696.09
432	14.318	600.518	600.51849_14.318	TG 32:0|TG 8:0_12:0_12:0	[M+NH4]+		1	True	10.26	600.52	C35H66O6	TG	JUSFMNAZAGJNRN-UHFFFAOYSA-N	O=C(OCC(OC(=O)CCCCCCCCCCC)COC(=O)CCCCCCCCCCC)CCCCCCC	410	True	True	True		False	False	null	null	100	99.9	72.4	80.1	100	59.39	Lipidomics_pos_AH_03	600.51904:2938 601.52239:1583 602.52575:410	105.07053:25 135.11864:31 309.27829:309 327.25195:163 383.31512:1374 439.37744:847 583.52264:87 600.51575:871	5900	18323.4	6251.06	20548.9	10587.2	5250	6410.71	6353.57	4739.29	6091.07	4033	4998	3346	3276	4160	12322.2	5768.84
433	18.365	601.517	601.51685_18.365	RIKEN P-VS1 ID-5826 from Mouse_Feces_WT_N_Ctr	[M+H]+	found in higher mz's MsMs_1756	0.4	True	12.88	601.515		Unknown			430	True	True	True		False	False	null	null	87.1	99.8	88	85.9	50	41.81	Lipidomics_pos_AH_04	601.51685:4246 602.5202:1889 603.52356:3520	601.48059:27	5551.06	8717.02	3000	9034.04	6348.94	1857.14	2280.36	2233.93	2148.21	2067.86	1718	1595	1550	1248	1538	6529.87	2117.68
434	10.786	601.517	601.5174_10.786	RIKEN P-VS1 ID-5826 from Mouse_Feces_WT_N_Ctr	[M+H]+		0.267	True	12.88	601.515		Unknown			430	True	True	True		False	False	null	null	92.4	100	87.2	87.4	100	31.47	Lipidomics_pos_BL_01	601.5174:1946 602.52075:777 603.52411:164	81.06406:49 111.12865:12 121.10182:71 412.34985:27 601.51715:3022	2897.87	3182.98	3314.89	3259.57	3063.83	3475	3601.79	3057.14	3939.29	3417.86	1359	1561	1623	1565	1652	3143.83	3498.42
435	17.542	601.518	601.51758_17.542	w/o MS2:RIKEN P-VS1 ID-5826 from Mouse_Feces_WT_N_Ctr	[M+H]+		0.067	False	12.88	601.515		Unknown			530	True	True	False		False	False	null	null	97.6	99.9	null	null	null	29.12	Lipidomics_pos_CON_03	601.51758:2828 602.52093:1463 603.52429:3091		961.702	1023.4	838.298	1106.38	1253.19	635.714	814.286	696.429	810.714	935.714	1023	1223	2828	2171	1874	1036.62	778.17
436	11.362	601.518	601.51788_11.362	RIKEN P-VS1 ID-5826 from Mouse_Feces_WT_N_Ctr	[M+H]+		0.333	True	12.88	601.515		Unknown			430	True	True	True		False	False	null	null	86.3	100	86.7	85.9	50	45.66	Lipidomics_pos_CON_01	601.51764:3185 602.52099:2068 603.52435:841	205.19466:13 601.51959:297	1323.4	1165.96	1076.6	1293.62	1180.85	1301.79	1100	1039.29	1469.64	1166.07	3185	2841	3222	2979	3115	1207.87	1215.42
437	17.195	601.518	601.51801_17.195	RIKEN P-VS1 ID-5826 from Mouse_Feces_WT_N_Ctr	[M+H]+		0.333	True	12.88	601.515		Unknown			430	True	True	True		False	False	null	null	85.7	99.9	85.9	85.9	50	43.68	Lipidomics_pos_CON_01	601.51813:2134 602.52148:805 603.52484:464	69.06985:124 149.13287:25 193.15857:50 302.27362:106 601.51837:3339	963.83	868.085	687.234	821.277	1074.47	766.071	766.071	751.786	960.714	933.929	2134	2215	4046	4188	4458	883.191	835.781
438	11.005	601.518	601.51831_11.005	RIKEN P-VS1 ID-5826 from Mouse_Feces_WT_N_Ctr	[M+H]+		0.333	True	12.88	601.515		Unknown			430	True	True	True		False	False	null	null	86.1	100	87.6	85.9	50	33.53	Lipidomics_pos_CON_01	601.51843:3135 602.52178:1617 603.52514:322	247.23964:26 601.51636:2126	1853.19	2427.66	1787.23	2357.45	2148.94	2078.57	1942.86	2076.79	2126.79	2176.79	3135	3220	3123	3465	3210	2114.47	2080.87
439	12.253	601.519	601.5188_12.253	RIKEN P-VS1 ID-5826 from Mouse_Feces_WT_N_Ctr	[M+H]+		0.6	True	12.88	601.515		Unknown			430	True	True	True		False	False	null	null	86.6	100	86.5	85.9	50	27.82	Lipidomics_pos_BL_02	601.51678:1935 602.52013:1121 603.52349:699	109.10174:106 601.44257:55 601.51605:4266	1217.02	1410.64	1206.38	1229.79	1400	2580.36	3455.36	2657.14	3394.64	3092.86	2708	2591	2037	2249	2284	1293.22	3036.03
440	4.323	602.381	602.38092_4.323	w/o MS2:PC 6:0_17:3	[M+H]+		0.333	True	5.99	602.382	C31H56NO8P	PC	WSSKKAHMDRXHJP-UHFFFAOYSA-N	O=C(OCC(OC(=O)CCCCCCC=CCC=CCC=CCC)COP(=O)([O-])OCC[N+](C)(C)C)CCCCC	530	True	True	False		False	False	null	null	99.8	100	null	null	null	48.19	Lipidomics_pos_AH_04	602.38092:2326 603.38427:760 604.38763:333	184.03384:13 556.37378:9 602.3797:1959	3525.53	3951.06	3268.09	4948.94	4389.36	1075	1228.57	1371.43	1110.71	1196.43	509	453	452	467	462	4016.44	1196.36
441	14.988	602.585	602.58508_14.988	Cer 40:2;2O|Cer 18:2;2O/22:0	[M+H-H2O]+	adduct linked to 503_[M+H]+; similar chromatogram in higher mz_598	0.933	True	12.44	602.587	C40H77NO3	Cer_NS	AWTNSRHUZXWBCO-UHFFFAOYSA-N	O=C(NC(CO)C(O)C=CCCC=CCCCCCCCCC)CCCCCCCCCCCCCCCCCCCCC	410	True	True	True		False	False	null	null	100	100	75.2	80.4	100	30.68	Lipidomics_pos_CON_02	602.58362:1893 603.58697:894 604.59033:261	236.23596:173 254.24689:40 262.25189:821 280.2684:120 297.27878:40 384.31577:25 567.52417:94 584.56335:142 602.55255:206	3725.53	4074.47	3768.09	4482.98	4136.17	2198.21	2205.36	2255.36	2096.43	2748.21	1814	1893	1699	1726	1567	4037.42	2300.09
442	18.368	603.532	603.5321_18.368	w/o MS2:RIKEN P-VS1 ID-5858 from Mouse_Plasma_ApoEKO_N_F1DHA	[M+H]+	ion correlated with 433; found in higher mz's MsMs_1635; similar chromatogram in higher mz_1740; similar chromatogram in higher mz_1901	0.133	True	13.1	603.53		Unknown			530	True	True	False		False	False	null	null	98.8	99.9	null	null	null	57.24	Lipidomics_pos_AH_04	603.5321:3769 604.53545:1656 605.53881:899	265.25342:42	4651.06	6555.32	2721.28	8019.15	5625.53	1775	1919.64	1807.14	1912.5	1810.71	1883	1633	1436	1406	1430	5514.97	1844.82
443	14.694	603.532	603.53217_14.694	w/o MS2:RIKEN P-VS1 ID-5858 from Mouse_Plasma_ApoEKO_N_F1DHA	[M+H-H2O]+	adduct linked to 548_[M+NH4]+; found in higher mz's MsMs_548	0.333	True	13.1	603.53		Unknown			530	True	True	False		False	False	null	null	98.7	100	null	null	null	34.02	Lipidomics_pos_CON_01	603.53217:2429 604.53552:1006 605.53888:283	81.06541:50 568.52039:54	1861.7	2591.49	1931.91	3157.45	2506.38	2191.07	2228.57	2564.29	2746.43	2578.57	2429	2064	1787	2175	1918	2409.34	2462.01
444	19.076	603.532	603.53229_19.076	w/o MS2:RIKEN P-VS1 ID-5863 from Mouse_Adipose_WT_N_F1AA	[M+H]+	similar chromatogram in higher mz_1875; found in higher mz's MsMs_1875	0.333	False	14.76	603.534		Unknown			530	True	True	False		False	False	null	null	98	99.9	null	null	null	41.86	Lipidomics_pos_AH_05	603.53229:2887 604.53564:2005 605.539:11769		4242.55	5153.19	3731.91	5172.34	6142.55	1598.21	1773.21	1396.43	1700	1835.71	1687	2672	2140	1875	1917	4888.4	1660.65
445	17.539	603.532	603.53229_17.539	w/o MS2:RIKEN P-VS1 ID-5863 from Mouse_Adipose_WT_N_F1AA	[M+H]+	ion correlated with 377; ion correlated with 435	0.133	True	14.76	603.534		Unknown			530	True	True	False		False	False	null	null	98.6	100	null	null	null	28.84	Lipidomics_pos_CON_03	603.53229:2202 604.53564:998 605.539:406	109.10275:25 121.09923:85 247.24046:71 332.33731:46 586.55695:181	1053.19	1055.32	742.553	921.277	1034.04	603.571	582.143	657.143	844.643	821.429	842	931	2202	1561	1356	961.117	701.54
446	18.723	603.533	603.53278_18.723	RIKEN P-VS1 ID-5863 from Mouse_Adipose_WT_N_F1AA	[M+H]+	similar chromatogram in higher mz_1786; found in higher mz's MsMs_1869	1	True	14.76	603.534		Unknown			430	True	True	True		False	False	null	null	82.3	99.9	79.1	77.3	50	124.83	Lipidomics_pos_CON_05	603.53314:5600 604.53649:3519 605.53985:2032	71.08514:57 95.08467:343 109.10105:144 135.11739:114 247.23901:109 339.2843:85 603.49463:226	15393.6	24106.4	12838.3	24846.8	20444.7	5283.93	8735.71	7257.14	7000	7753.57	6879	6924	7333	6658	5600	19525.7	7206.03
447	11.78	603.533	603.53314_11.78	w/o MS2:RIKEN P-VS1 ID-5863 from Mouse_Adipose_WT_N_F1AA	[M+H]+	similar chromatogram in higher mz_1238	0.733	True	14.76	603.534		Unknown			530	True	True	False		False	False	null	null	99.5	100	null	null	null	257.18	Lipidomics_pos_BL_02	603.53314:16839 604.53649:12049 605.53985:2501	85.10005:58 123.11657:73 245.22691:26 263.23618:82 319.26129:52	20914.9	20917	23657.4	23655.3	24431.9	26671.4	30069.6	29739.3	28857.1	24728.6	8036	12344	15375	12805	11306	22715.4	28013.1
448	11.652	603.533	603.53345_11.652	w/o MS2:RIKEN P-VS1 ID-5863 from Mouse_Adipose_WT_N_F1AA	[M+H]+		0.267	True	14.76	603.534		Unknown			530	True	True	False		False	False	null	null	99.7	100	null	null	null	251.67	Lipidomics_pos_CON_03	603.53345:15375 604.5368:5534 605.54016:1115	121.10073:49 163.14594:41 247.24422:51 603.53241:1691	7138.3	8823.4	23657.4	23655.3	8089.36	26671.4	30069.6	29739.3	28857.1	11164.3	11892	12688	15375	12805	10859	14272.6	25300.1
449	13.043	603.534	603.53351_13.043	w/o MS2:RIKEN P-VS1 ID-5863 from Mouse_Adipose_WT_N_F1AA	[M+H]+	ion correlated with 893; found in higher mz's MsMs_1049	1	True	14.76	603.534		Unknown			530	True	True	False		False	False	null	null	99.8	100	null	null	null	191.43	Lipidomics_pos_CON_01	603.53351:22117 604.53686:10129 605.54022:3368	81.06926:107 265.25247:118	7553.19	9195.74	6851.06	8553.19	7393.62	10221.4	12387.5	11819.6	12257.1	13985.7	22117	17602	17476	19187	18371	7909.02	12134.4
450	11.948	603.535	603.53473_11.948	w/o MS2:RIKEN P-VS1 ID-5863 from Mouse_Adipose_WT_N_F1AA	[M+H]+		0.067	False	14.76	603.534		Unknown			530	True	True	False		False	False	null	null	99.9	100	null	null	null	182.21	Lipidomics_pos_CON_03	603.53473:8521 604.53808:3778 605.54144:1064		9940.43	10885.1	7331.91	10544.7	24431.9	12094.6	12092.9	6742.86	9101.79	8523.21	7199	7624	8521	6907	8940	12626.9	9710.78
451	14.158	604.506	604.50604_14.158	w/o MS2:Cer 13:2;2O/28:6	[M+H]+		1	True	9.74	604.509	C41H67NO3	Cer_NS	LVQPSLILUKNQMD-UHFFFAOYSA-N	O=C(NC(CO)C(O)C=CCCC=CCCCC)CCCCCCCCC=CCC=CCC=CCC=CCC=CCC=CCC	530	True	True	False		False	False	null	null	97.5	99.9	null	null	null	52.83	Lipidomics_pos_BL_04	604.50604:3161 605.50939:1775 606.51275:500	604.50598:266 604.53625:36	3546.81	4221.28	2936.17	3808.51	3531.91	4887.5	5214.29	5523.21	5644.64	5458.93	2901	2597	2497	2642	2854	3609.04	5345.51
452	11.718	604.536	604.53558_11.718	w/o MS2:Cer 12:1;3O/26:2;(2OH)	[M+H]+		0.067	True	9.39	604.53	C38H71NO5	Cer_AP	GDHVGOHWNADSOB-UHFFFAOYSA-N	O=C(NC(CO)C(O)C(O)CCCC=CCCC)C(O)CCCCCCCCCCCCC=CCC=CCCCCCCC	530	True	True	False		False	False	null	null	89.6	100	null	null	null	124.55	Lipidomics_pos_CON_01	604.53558:5821 605.53893:1605 606.54229:781	95.08562:113 97.10119:197 247.24898:26	10240.4	4557.45	12319.1	10219.1	3242.55	11426.8	13580.4	11626.8	12908.9	11351.8	5821	5595	6677	5946	6445	8115.85	12179
453	15.663	604.601	604.60083_15.663	Cer 40:1;2O|Cer 18:1;2O/22:0	[M+H-H2O]+	adduct linked to 508_[M+H]+; adduct linked to 562_[M+Na]+; similar chromatogram in higher mz_605; found in higher mz's MsMs_508	0.133	True	13.02	604.603	C40H79NO3	Cer_NS	KEPQASGDXIEOIL-UHFFFAOYSA-N	O=C(NC(CO)C(O)C=CCCCCCCCCCCCCC)CCCCCCCCCCCCCCCCCCCCC	410	True	True	True		False	False	null	null	100	100	60.1	51.9	100	123.47	Lipidomics_pos_CON_03	604.60083:6749 605.60418:4082 606.60754:1949	135.11159:19 224.2356:64 250.25233:97 264.26877:1324 282.27841:207 569.37183:39 586.59308:223 604.60095:2589	12491.5	15602.1	10666	14810.6	15119.1	10362.5	10764.3	11123.2	12116.1	12773.2	8879	7292	6749	7087	6849	13737.9	11427.5
454	13.965	605.453	605.45331_13.965	w/o MS2:SL 12:1;O/20:1;O	[M+H]+		1	True	7.91	605.456	C32H61NO6S	SL	NYIHRRZJDXPFFG-UHFFFAOYSA-N	O=C(N(CC(O)C=CCCCCCCC)CS(=O)(=O)O)C(O)CCCCCCCCC=CCCCCCCCC	530	True	True	False		False	False	null	null	97.9	99.8	null	null	null	59.71	Lipidomics_pos_CON_02	605.45331:4028 606.45666:1756 607.46002:1492	111.11754:290 127.14426:50 195.13954:59 247.24054:451 265.25244:1409 603.54443:55	4927.66	6025.53	5217.02	6642.55	6000	5141.07	6203.57	5975	4700	6430.36	3492	4028	3675	3011	2952	5762.31	5689.93
455	14.315	605.474	605.47357_14.315	w/o MS2:TG 8:0_8:0_16:0	[M+H]+		0.067	True	9.64	605.475	C35H66O6	TG	DOGUBKIAUPWEJM-UHFFFAOYSA-N	O=C(OCC(OC(=O)CCCCCCC)COC(=O)CCCCCCCCCCCCCCC)CCCCCCC	530	True	True	False		False	False	null	null	99.1	99.9	null	null	null	53.45	Lipidomics_pos_AH_02	605.47357:2467 606.47692:906 607.48028:280	327.24625:43 442.32626:28	2074.47	5248.94	1991.49	5719.15	3314.89	1776.79	2030.36	2035.71	1742.86	1964.29	953	1177	1048	974	1018	3669.52	1909.64
456	16.136	605.547	605.54675_16.136	w/o MS2:RIKEN P-VS1 ID-5903 from Cell_C2C12_WT_N_4hCtr	[M+Na]+	ion correlated with 339; ion correlated with 391; ion correlated with 505; adduct linked to 339_[M+H-H2O]+	0.333	True	13.2	605.552		Unknown			530	True	True	False		False	False	null	null	90.6	100	null	null	null	25.08	Lipidomics_pos_CON_01	605.54675:2008 606.5501:1171 607.55346:708	179.17615:25 547.46838:14 605.54547:4260	329.787	429.787	363.83	334.043	414.894	537.5	592.857	591.071	610.714	733.929	2008	1557	1770	1529	1619	374.495	613.192
457	19.087	605.549	605.54852_19.087	w/o MS2:RIKEN P-VS1 ID-5903 from Cell_C2C12_WT_N_4hCtr	[M+H]+	ion correlated with 383; found in higher mz's MsMs_1875; similar chromatogram in higher mz_1875; found in higher mz's MsMs_1776; similar chromatogram in higher mz_2093; similar chromatogram in higher mz_2117	1	True	13.2	605.552		Unknown			530	True	True	False		False	False	null	null	95.7	99.8	null	null	null	88.19	Lipidomics_pos_CON_02	605.54852:7933 606.55187:4020 607.55523:1852	83.0865:28 605.54956:1078	10776.6	14751.1	9429.79	14468.1	15819.1	3657.14	3917.86	3569.64	3925	4357.14	5085	7933	6066	5168	5974	13049	3885.58
458	13.872	605.549	605.54871_13.872	w/o MS2:RIKEN P-VS1 ID-5903 from Cell_C2C12_WT_N_4hCtr	[M+H]+	found in higher mz's MsMs_934; found in higher mz's MsMs_1068; similar chromatogram in higher mz_1068	1	True	13.2	605.552		Unknown			530	True	True	False		False	False	null	null	96.1	100	null	null	null	266.86	Lipidomics_pos_CON_05	605.54871:32881 606.55206:15068 607.55542:3859	109.101:165 605.24506:55 605.54865:4592	15834	18840.4	15268.1	17751.1	20363.8	12119.6	17044.6	12648.2	15567.9	14796.4	30070	32718	26232	30058	32881	17611.4	14435.5
459	15.433	605.549	605.54883_15.433	w/o MS2:RIKEN P-VS1 ID-5903 from Cell_C2C12_WT_N_4hCtr	[M+H-H2O]+	ion correlated with 501; adduct linked to 552_[M+NH4]+; found in higher mz's MsMs_552	0.6	True	13.2	605.552		Unknown			530	True	True	False		False	False	null	null	96.4	100	null	null	null	40.14	Lipidomics_pos_CON_01	605.54883:3554 606.55218:2380 607.55554:535	71.08411:123 605.5481:4705	1791.49	2017.02	1804.26	2410.64	2059.57	2371.43	2867.86	2548.21	2248.21	2901.79	3554	3133	2952	3372	3029	2016.22	2587.59
460	19.432	605.549	605.54895_19.432	w/o MS2:RIKEN P-VS1 ID-5903 from Cell_C2C12_WT_N_4hCtr	[M+H]+	found in higher mz's MsMs_1882; similar chromatogram in higher mz_1955; similar chromatogram in higher mz_2045	0.4	True	13.2	605.552		Unknown			530	True	True	False		False	False	null	null	96.6	99.8	null	null	null	27.3	Lipidomics_pos_CON_05	605.54895:2318 606.5523:1192 607.55566:2794	267.26761:13 605.54785:343	3151.06	3387.23	2125.53	3691.49	3382.98	1155.36	1053.57	1144.64	1094.64	1512.5	1912	2229	1927	1869	2318	3147.58	1192.25
461	12.559	605.549	605.54919_12.559	w/o MS2:RIKEN P-VS1 ID-5903 from Cell_C2C12_WT_N_4hCtr	[M+H]+	found in higher mz's MsMs_1791	1	True	13.2	605.552		Unknown			530	True	True	False		False	False	null	null	97.1	100	null	null	null	211.62	Lipidomics_pos_CON_02	605.54919:18894 606.55254:10002 607.5559:2403	69.07024:67 135.11852:40 249.25777:26 603.53845:27	13472.3	13642.6	13668.1	13244.7	13651.1	18226.8	20155.4	20987.5	20232.1	24233.9	16754	18894	14626	17130	16959	13536.3	20767.1
462	12.785	605.549	605.5495_12.785	w/o MS2:RIKEN P-VS1 ID-5903 from Cell_C2C12_WT_N_4hCtr	[M+H]+	found in higher mz's MsMs_1276	1	True	13.2	605.552		Unknown			530	True	True	False		False	False	null	null	97.7	100	null	null	null	266.05	Lipidomics_pos_CON_05	605.5495:24427 606.55285:12556 607.55621:3580	71.08451:76 85.10048:30 135.11674:24 179.17764:10 247.24139:59 267.26675:79 605.54919:2980	12748.9	11463.8	12257.4	13295.7	9623.4	29753.6	31014.3	29425	39614.3	35957.1	19522	21892	19970	21759	24427	11877.7	33153.4
463	2.438	606.303	606.30267_2.438	Unknown	[M+H]+		0.267	True	null	null	null	null	null	null	999	False	False	False		False	False	null	null	null	null	null	null	null	20.38	Lipidomics_pos_AH_01	606.30225:1032 607.3056:334 608.30896:143	183.06714:72 184.0728:140 198.08539:144 211.09424:75 245.1003:86 309.17297:184 392.14133:120 465.2905:87	2195.74	2348.94	2208.51	2563.83	2204.26	1078.57	1101.79	908.929	883.929	832.143	570	574	565	590	621	2304.23	960.848
464	18.042	607.263	607.26294_18.042	Unknown	[M+H]+	similar chromatogram in higher mz_2142	0.067	False	null	null	null	null	null	null	999	False	False	False		False	False	null	null	null	null	null	null	null	12.55	Lipidomics_pos_AH_05	607.26294:5107 608.26629:5080 609.26965:79099		2865.96	1963.83	1840.43	2591.49	10866	2057.14	2598.21	1789.29	1569.64	2067.86	1919	1253	1408	1656	1596	4025.82	2016.36
465	18.616	607.263	607.26331_18.616	Unknown	[M+H]+		0.067	False	null	null	null	null	null	null	999	False	False	False		False	False	null	null	null	null	null	null	null	4.1	Lipidomics_pos_BL_02	607.26331:1906 608.26666:1901 609.27002:27941		1997.87	3065.96	2178.72	2176.6	2623.4	2108.93	3403.57	2025	1726.79	2005.36	1966	1606	1604	1850	1518	2408.88	2253.84
466	20.986	607.264	607.26355_20.986	Unknown	[M+H]+		0.067	True	null	null	null	null	null	null	999	False	False	False		False	False	null	null	null	null	null	null	null	4.39	Lipidomics_pos_AH_01	607.26355:1856 608.2669:1977 609.27026:24159	117.09083:2 195.06445:52 224.10008:3 265.13385:8 310.21567:5 379.16464:3 393.1778:5 427.24219:3 439.20255:13 494.33374:18 547.54504:3 573.22192:12 592.24353:7 607.26422:2386	3948.94	3565.96	1834.04	2214.89	3744.68	1937.5	2230.36	1353.57	1407.14	2294.64	2043	1254	1493	1286	1452	3061.44	1844.67
467	21.762	607.264	607.26367_21.762	Unknown	[M+H]+		0.067	True	null	null	null	null	null	null	999	False	False	False		False	False	null	null	null	null	null	null	null	8.85	Lipidomics_pos_BL_05	607.26367:3505 608.26702:3911 609.27038:44535	69.07047:1 86.09483:3 129.10033:3 191.13931:1 202.21548:1 227.1163:3 251.11485:2 360.32208:1 368.17636:1 395.15204:3 398.21735:1 402.22116:2 416.24252:3 486.23666:1 495.26511:15 547.52838:1 572.31128:3 575.23877:8 590.56415:2 598.83868:1 607.26416:1610	1763.83	1972.34	2459.57	2080.85	2025.53	1542.86	1669.64	1850	1685.71	6258.93	2234	1596	1381	1525	1117	2060.16	2601.32
468	21.522	607.264	607.26373_21.522	Unknown	[M+H-H2O]+	adduct linked to 512_[M+H]+	0.267	True	null	null	null	null	null	null	999	False	False	False		False	False	null	null	null	null	null	null	null	10.88	Lipidomics_pos_AH_04	607.26398:2981 608.26733:2051 609.27069:30365	395.19565:807 495.26041:49 575.23645:28 605.26593:11	1597.87	13927.7	2597.87	6342.55	2004.26	2637.5	1725	6110.71	1755.36	9067.86	2148	1155	952	1345	1500	5293.64	4259.58
469	15.052	607.264	607.26379_15.052	Unknown	[M+H]+		0.067	True	null	null	null	null	null	null	999	False	False	False		False	False	null	null	null	null	null	null	null	3.73	Lipidomics_pos_AH_03	607.26379:2202 608.26714:1465 609.2705:18671	395.19733:33	1802.13	2374.47	4685.11	2063.83	2665.96	1314.29	1507.14	1514.29	2330.36	2100	1543	1323	888	1110	1441	2717.95	1753.1
470	16.502	607.264	607.26385_16.502	Unknown	[M+H]+		0.067	True	null	null	null	null	null	null	999	False	False	False		False	False	null	null	null	null	null	null	null	9.71	Lipidomics_pos_BL_04	607.26385:3015 608.2672:2293 609.27056:32869	591.22931:14	1804.26	1729.79	1965.96	1959.57	2259.57	1916.07	1667.86	1785.71	5383.93	1575	1896	1217	1257	1384	1348	1943.09	2465.49
471	10.744	607.264	607.26416_10.744	Unknown	[M+H]+		0.133	False	null	null	null	null	null	null	999	False	False	False		False	False	null	null	null	null	null	null	null	5.17	Lipidomics_pos_AH_03	607.26416:2657 608.26751:2755 609.27087:36814		2359.57	1670.21	5653.19	1708.51	5280.85	1691.07	1303.57	1635.71	1116.07	1776.79	1305	1124	1049	1168	1236	3334.31	1504.49
472	5.511	607.265	607.26453_5.511	Unknown	[M+H]+		0.067	True	null	null	null	null	null	null	999	False	False	False		False	False	null	null	null	null	null	null	null	4.35	Lipidomics_pos_AH_03	607.26453:2146 608.26788:1781 609.27124:23266	607.26184:145	1823.4	1944.68	4565.96	2219.15	2474.47	1548.21	1655.36	1825	1844.64	1930.36	1210	1175	1310	837	1542	2605.35	1760.98
473	12.1	607.389	607.38916_12.1	w/o MS2:RIKEN P-VS1 ID-5923 from Mouse_Feces_WT_N_Ctr	[M+H]+		0.067	True	5.84	607.397		Unknown			530	True	True	False		False	False	null	null	80.3	99.8	null	null	null	19.14	Lipidomics_pos_BL_04	607.38916:1151 608.39251:643 609.39587:0	381.24469:98 439.20135:406 607.26508:1392	1329.79	1046.81	893.617	1306.38	1355.32	801.786	953.571	1605.36	2055.36	1519.64	550	462	556	417	494	1186.09	1387.3
474	13.406	607.39	607.38995_13.406	Unknown	[M+H]+	found in higher mz's MsMs_614; found in higher mz's MsMs_2178; found in higher mz's MsMs_753; adduct linked to 510_[M+NH4]+	1	True	null	null	null	null	null	null	999	False	False	False		False	False	null	null	null	null	null	null	null	33.19	Lipidomics_pos_AH_05	607.38873:8932 608.39208:4128 609.39544:1035	195.06073:75 327.0777:98 383.13998:180 439.20261:490 495.26569:1704 607.38916:1746	20787.2	17255.3	14308.5	16448.9	19004.3	14985.7	13701.8	26421.4	29105.4	26832.1	10375	6389	7085	8032	8128	17560.6	22209.4
475	14.668	607.469	607.46912_14.668	w/o MS2:SL 12:1;O/20:0;O	[M+H]+	ion correlated with 497; similar chromatogram in higher mz_1177	1	True	8.02	607.471	C32H63NO6S	SL	KHTYFCHPBIHXNY-UHFFFAOYSA-N	O=C(N(CC(O)C=CCCCCCCC)CS(=O)(=O)O)C(O)CCCCCCCCCCCCCCCCCC	530	True	True	False		False	False	null	null	98.3	99.8	null	null	null	80.63	Lipidomics_pos_CON_01	607.46912:9073 608.47247:4056 609.47583:830	363.16553:49 589.57397:80 607.26422:3935	5482.98	6948.94	5936.17	7412.77	6848.94	8314.29	9767.86	7858.93	8058.93	9823.21	9073	7967	7939	7433	7895	6525.59	8764.84
476	12.183	607.508	607.50763_12.183	w/o MS2:SL 12:0;O/21:0	[M+H]+	found in higher mz's MsMs_942	0.133	True	8.99	607.508	C33H67NO5S	SL	FXKIBOLLSFWXFI-UHFFFAOYSA-N	O=C(N(CC(O)CCCCCCCCC)CS(=O)(=O)O)CCCCCCCCCCCCCCCCCCCC	530	True	True	False		False	False	null	null	100	99.9	null	null	null	23.43	Lipidomics_pos_CON_01	607.50763:1615 608.51098:1086 609.51434:0	195.06551:57 395.18781:189	1268.09	1055.32	1223.4	1423.4	1559.57	823.214	794.643	744.643	1269.64	775	1615	1233	1563	1414	1164	1306.14	881.116
477	19.437	607.564	607.56384_19.437	w/o MS2:RIKEN P-VS1 ID-5931 from Mouse_Macrophage_WT_N_F1AA	[M+H]+	similar chromatogram in higher mz_1782; found in higher mz's MsMs_1782; found in higher mz's MsMs_1882; similar chromatogram in higher mz_2096	0.533	True	13.2	607.562		Unknown			530	True	True	False		False	False	null	null	99.2	99.8	null	null	null	22.02	Lipidomics_pos_CON_05	607.56384:1763 608.56719:1344 609.57055:216	71.08503:72 381.24756:15 395.19485:106 607.26331:436 607.56366:2800	2544.68	3117.02	2091.49	3259.57	3374.47	1280.36	1058.93	1232.14	1033.93	1376.79	1614	1483	1374	1528	1763	2877.21	1196.83
478	3.543	608.392	608.39172_3.543	w/o MS2:SL 12:1;O/22:5;O	[M+H]+		0.667	True	7.01	608.398	C34H57NO6S	SL	NRJBMTWAUALONP-UHFFFAOYSA-N	O=C(N(CC(O)C=CCCCCCCC)CS(=O)(=O)O)C(O)CCCCC=CCC=CCC=CCC=CCC=CCC	530	True	True	False		False	False	null	null	88	99.9	null	null	null	16.61	Lipidomics_pos_CON_01	608.39172:4668 609.39507:640 610.39843:296	104.10566:21 184.07324:3720 381.18362:48 479.19165:13 608.27142:247 608.39105:4012	2953.19	4080.85	3472.34	4093.62	3331.91	1614.29	1673.21	1705.36	1516.07	1982.14	4668	4125	3692	4074	3581	3586.46	1698.21
479	18.042	609.279	609.27856_18.042	Unknown	[M+H]+	adduct linked to 515_[M+NH4]+	0.067	False	null	null	null	null	null	null	999	False	False	False		False	False	null	null	null	null	null	null	null	14.18	Lipidomics_pos_AH_05	609.27856:31374 610.28191:31602 611.28527:6991		35931.9	41685.1	30593.6	31691.5	66753.2	31221.4	34014.3	28487.5	27975	32478.6	21219	18001	18245	19060	20025	41330.9	30835.3
480	21.522	609.279	609.27887_21.522	Unknown	[M+H]+		0.2	True	null	null	null	null	null	null	999	False	False	False		False	False	null	null	null	null	null	null	null	9.78	Lipidomics_pos_AH_02	609.27881:33414 610.28216:30955 611.28552:6655	143.07072:9 174.09145:148 192.10158:26 215.11458:13 228.12489:6 304.12888:7 333.15768:16 350.15594:7 380.18353:13 436.155:10 448.19519:134 607.2558:7	39704.3	71093.6	41206.4	51957.4	35610.6	40941.1	34480.4	46603.6	34216.1	60137.5	24893	19175	20337	21134	20966	47914.2	43275.6
481	19.848	609.279	609.27911_19.848	Unknown	[M+H]+	similar chromatogram in higher mz_2126	0.067	False	null	null	null	null	null	null	999	False	False	False		False	False	null	null	null	null	null	null	null	5.49	Lipidomics_pos_AH_03	609.27911:24058 610.28246:11172 611.28582:2064		38383	39536.2	51187.2	35585.1	37140.4	31833.9	31317.9	36094.6	31830.4	33323.2	26557	18479	22497	22161	20262	40366.6	32879.9
482	12.522	609.525	609.52502_12.522	w/o MS2:NAGly 8:0;O(FA 26:2)	[M+H]+	found in higher mz's MsMs_956; similar chromatogram in higher mz_558	0.533	True	8.98	609.52	C36H65NO5	NAGly	YFXJQNFPYSWFPD-UHFFFAOYSA-N	O=C(O)CNC(=O)CCCC(OC(=O)CCCCCCCCCCCCCC=CCC=CCCCCCCC)CCC	530	True	True	False		False	False	null	null	92.1	99.9	null	null	null	33.05	Lipidomics_pos_CON_02	609.52502:1788 610.52837:830 611.53173:377	159.06454:25 192.10229:89 215.11655:48 224.12682:121 322.1441:34 380.18887:62 436.19638:156 609.21967:75	2008.51	2591.49	2272.34	2374.47	2095.74	1139.29	1087.5	1151.79	1196.43	1503.57	1694	1788	1377	1392	1579	2268.83	1215.85
483	13.415	610.184	610.18433_13.415	Unknown	[M+H]+		1	True	null	null	null	null	null	null	999	False	False	False		False	False	null	null	null	null	null	null	null	62.04	Lipidomics_pos_AH_01	610.18457:2008 611.18792:1614 612.19128:1024	175.0943:111 195.06638:445 237.12894:72 341.01138:112 366.18869:209 398.21545:909 436.19397:53 593.25378:69	4272.34	4627.66	4255.32	4574.47	5289.36	3812.5	4021.43	4141.07	5494.64	5069.64	2242	2000	1745	2059	2280	4603.72	4507.95
484	14.012	610.537	610.53693_14.012	DG 34:2|DG 16:0_18:2	[M+NH4]+	adduct linked to 363_[M+H-H2O]+	1	True	10.84	610.541	C37H68O5	DG	SVXWJFFKLMLOHO-UHFFFAOYSA-N	O=C(OCC(OC(=O)CCCCCCCC=CCC=CCCCCC)CO)CCCCCCCCCCCCCCC	410	True	True	True		False	False	null	null	100	100	60.4	78	100	62.45	Lipidomics_pos_BL_04	610.53973:2137 611.54308:1194 612.54644:341	91.05417:96 149.13338:90 175.09608:161 222.10854:96 263.23749:84 313.27319:1006 337.27335:730 381.18982:56 398.21652:767 575.44867:156 575.50189:1677	3846.81	4259.57	3861.7	5506.38	4802.13	4023.21	4485.71	4139.29	3816.07	4792.86	3075	2952	2315	2351	2786	4455.37	4251.47
485	10.877	610.575	610.57483_10.877	w/o MS2:Cer 12:0;3O/26:0;(2OH)	[M+H]+		0.067	True	11.38	610.577	C38H77NO5	Cer_AP	TUGMJZRJEDQCQO-UHFFFAOYSA-N	O=C(NC(CO)C(O)C(O)CCCCCCCC)C(O)CCCCCCCCCCCCCCCCCCCCCCCC	530	True	True	False		False	False	null	null	98.6	100	null	null	null	29.64	Lipidomics_pos_AH_02	610.57483:1112 611.57818:489 612.58154:151	184.07259:34 255.23717:17 398.21356:258 448.20004:65 578.2511:33 610.28345:3133	1085.11	2365.96	1285.11	842.553	776.596	632.143	1083.93	1196.43	778.571	814.286	308	332	310	383	298	1271.09	901.116
486	13.197	611.538	611.53766_13.197	w/o MS2:NAGly 8:0;O(FA 26:1)	[M+H]+	found in higher mz's MsMs_971	0.4	True	9.13	611.536	C36H67NO5	NAGly	BZJPKTFPPBZHKE-UHFFFAOYSA-N	O=C(O)CNC(=O)CCCC(OC(=O)CCCCCCCCCCCCCC=CCCCCCCCCCC)CCC	530	True	True	False		False	False	null	null	98.7	99.9	null	null	null	42.52	Lipidomics_pos_CON_04	611.53766:1973 612.54101:1355 613.54437:619	69.03199:115 135.11681:145 193.10222:51 195.06866:223 261.25391:205 356.06741:100 611.28516:1273	3268.09	3751.06	3482.98	3195.74	3114.89	1326.79	1542.86	1416.07	1532.14	1183.93	1563	1689	1758	1973	1738	3362.63	1400.58
487	13.457	611.539	611.53864_13.457	w/o MS2:NAGly 8:0;O(FA 26:1)	[M+H]+		0.533	True	9.13	611.536	C36H67NO5	NAGly	BZJPKTFPPBZHKE-UHFFFAOYSA-N	O=C(O)CNC(=O)CCCC(OC(=O)CCCCCCCCCCCCCC=CCCCCCCCCCC)CCC	530	True	True	False		False	False	null	null	97.2	99.9	null	null	null	73.22	Lipidomics_pos_CON_04	611.53864:4055 612.54199:2268 613.54535:419	81.0764:50 83.08487:178 97.10188:98 111.11534:139 139.1113:116 185.13332:51 196.06767:194 266.99554:111 285.2189:169 307.29895:566 575.5014:152 611.28442:1352	4248.94	3406.38	3655.32	3121.28	3642.55	1653.57	1701.79	1533.93	1351.79	1644.64	3913	2873	2901	4055	3936	3614.79	1577.23
488	13.414	612.182	612.18213_13.414	Unknown	[M+H]+		0.067	True	null	null	null	null	null	null	999	False	False	False		False	False	null	null	null	null	null	null	null	18.22	Lipidomics_pos_CON_02	612.18213:1035 613.18548:793 614.18884:118	73.04743:164 269.00027:115 281.04745:115 357.06662:493 417.03186:84 612.18176:686	1797.87	1774.47	1910.64	2182.98	2459.57	2016.07	1832.14	1883.93	2725	2058.93	942	1035	982	1047	942	2025.4	2102.97
489	6.082	612.504	612.50415_6.082	w/o MS2:MG 36:8	[M+H]+	similar chromatogram in higher mz_534	1	True	9.5	612.499	C39H62O4	MG	RLJKNHXESRLEGH-UHFFFAOYSA-N	O=C(OCC(O)CO)CCCCCCCCCCC=CCC=CCC=CCC=CCC=CCC=CCC=CCC=CCC	530	True	True	False		False	False	null	null	65.6	99.9	null	null	null	297.64	Lipidomics_pos_CON_02	612.50415:36577 613.5075:14992 614.51086:2666	87.0439:24 117.08976:45 169.19496:86 233.1785:25 595.47784:159 612.50378:3205	43446.8	41208.5	35678.7	33923.4	22797.9	31360.7	44732.1	24889.3	23100	19716.1	20466	36577	16229	13697	15110	35411.1	28759.6
490	14.688	612.555	612.55536_14.688	DG 34:1|DG 18:0_16:1	[M+NH4]+	ion correlated with 535; adduct linked to 418_[M+H]+; adduct linked to 497_[M+Na]+	1	True	11.65	612.556	C37H70O5	DG	WEYCUJKFHUWUDC-UHFFFAOYSA-N	O=C(OCC(OC(=O)CCCCCCCC=CCCCCCC)CO)CCCCCCCCCCCCCCCCC	410	True	True	True		False	False	null	null	100	100	55.5	59	100	186.14	Lipidomics_pos_CON_03	612.5545:17803 613.55785:9106 614.56121:2035	83.08482:48 239.23427:64 265.25198:69 311.25565:78 341.30414:102 595.52509:50	9023.4	11789.4	8857.45	13291.5	11295.7	13366.1	16394.6	13791.1	14039.3	16839.3	19901	18162	17803	17349	17061	10851.6	14886.2
491	11.094	613.518	613.51752_11.094	Unknown	[M+H]+		0.6	True	null	null	null	null	null	null	999	False	False	False		False	False	null	null	null	null	null	null	null	29.05	Lipidomics_pos_AH_02	613.51807:1507 614.52142:644 615.52478:123	85.10107:48 121.10374:28 203.18085:57 325.27219:28 613.51746:2526	2285.11	3206.38	2402.13	2904.26	2531.91	1414.29	1950	1776.79	1641.07	1757.14	1280	1316	1436	1650	1470	2666.25	1708.3
492	13.867	613.555	613.55536_13.867	w/o MS2:NAGly 8:0;O(FA 26:0)	[M+H]+	ion correlated with 531	0.2	True	10.05	613.551	C36H69NO5	NAGly	CVHCXAXZSQPYPL-UHFFFAOYSA-N	O=C(O)CNC(=O)CCCC(OC(=O)CCCCCCCCCCCCCCCCCCCCCCCCC)CCC	530	True	True	False		False	False	null	null	94.9	99.9	null	null	null	24.83	Lipidomics_pos_CON_01	613.55536:1373 614.55871:796 615.56207:0	111.11674:84 307.29346:114	853.191	946.809	878.723	955.319	1065.96	446.429	571.429	458.929	610.714	610.714	1373	1239	969	1010	1235	940	539.487
493	15.423	614.571	614.5705_15.423	DG 34:0|DG 16:0_18:0	[M+NH4]+	adduct linked to 501_[M+Na]+; similar chromatogram in higher mz_1536	0.867	True	12.88	614.572	C37H72O5	DG	ONCLVQFEAFTXMN-UHFFFAOYSA-N	O=C(OCC(OC(=O)CCCCCCCCCCCCCCCCC)CO)CCCCCCCCCCCCCCC	410	True	True	True		False	False	null	null	100	100	76.8	87.1	100	51.69	Lipidomics_pos_AH_02	614.57147:1384 615.57482:887 616.57818:534	83.08554:35 227.20082:20 264.26752:38 313.27353:1251 341.30472:1103 397.32816:16 579.49634:93 597.54321:50 614.47687:147	2417.02	2944.68	2310.64	3427.66	2844.68	3482.14	4107.14	3483.93	3380.36	4614.29	6960	6318	6084	5978	6730	2788.8	3813.71
494	14.013	615.494	615.49414_14.013	DG 34:2	[M+Na]+		0.933	True	10.77	615.496	C37H68O5	DG	DPWHHRVJHABNSH-UHFFFAOYSA-N	O=C(OCC(OC(=O)CCCCCCCCCCCCCC=CCC=CCCCCCCC)CO)CCCCCCC	420	True	True	True		False	False	null	null	100	99.9	74.3	75	100	31.13	Lipidomics_pos_CON_01	615.49548:1631 616.49883:749 617.50219:263	426.3671:53 615.44769:79 615.46533:214 615.49628:3894	2444.68	2568.09	2259.57	3089.36	2865.96	2626.79	3180.36	2848.21	2619.64	2967.86	1631	1865	1324	1436	1367	2645.74	2848.55
495	11.902	615.532	615.53204_11.902	Unknown	[M+H]+		0.467	True	null	null	null	null	null	null	999	False	False	False		False	False	null	null	null	null	null	null	null	36.79	Lipidomics_pos_BL_01	615.53473:1236 616.53808:551 617.54144:0	81.07215:70 95.08495:107 341.3049:178	1617.02	1195.74	2161.7	1095.74	1821.28	2207.14	1448.21	1548.21	1307.14	1639.29	2186	2411	1920	1686	2300	1577.93	1629.89
496	15.261	616.601	616.60114_15.261	Cer 41:2;2O|Cer 17:1;2O/24:1	[M+H-H2O]+	adduct linked to 538_[M+H]+; found in higher mz's MsMs_538	0.6	True	12.86	616.603	C41H79NO3	Cer_NS	IHCUODHUCJDYIO-UHFFFAOYSA-N	O=C(NC(CO)C(O)C=CCCCCCCCCCCCC)CCCCCCCCCCCC=CCCCCCCCCCC	410	True	True	True		False	False	null	null	100	100	68	60.9	100	42.36	Lipidomics_pos_CON_02	616.60144:1266 617.60479:814 618.60815:182	227.12491:20 238.2523:58 250.21889:36 250.25281:508 297.27853:123 483.35776:21 586.58832:53 616.56415:255	2461.7	2602.13	2085.11	2678.72	2555.32	1564.29	1630.36	1725	1676.79	1682.14	1304	1266	1210	1292	1220	2476.44	1655.6
497	14.691	617.51	617.5105_14.691	DG 34:1	[M+Na]+	ion correlated with 475; adduct linked to 490_[M+NH4]+	1	True	11.53	617.511	C37H70O5	DG	GXKVCDAYOVXTID-UHFFFAOYSA-N	O=C(OCC(OC(=O)CCCCCCCCCCCCCC=CCCCCCCCCCC)CO)CCCCCCC	420	True	True	True		False	False	null	null	100	99.9	75	75	100	104.14	Lipidomics_pos_BL_02	617.5108:5060 618.51415:2263 619.51751:710	617.51093:731	5482.98	6259.57	5002.13	8053.19	7142.55	8169.64	9035.71	7492.86	7455.36	9533.93	10567	10176	9513	9794	8862	6387.74	8337.34
498	12.242	617.547	617.54675_12.242	RIKEN P-VS1 ID-6165 from Cell_HEK293_WT_N_Ctr	[M+H]+		0.2	True	13.09	617.552		Unknown			430	True	True	True		False	False	null	null	84.4	100	73.7	75	100	19	Lipidomics_pos_CON_04	617.54895:1037 618.5523:871 619.55566:513	81.07148:50 95.08578:143 135.11385:85 617.54669:2683	344.681	200	382.979	444.681	444.681	516.071	505.357	380.357	439.286	462.5	1132	1104	1147	1037	994	363.059	460.647
499	15.987	618.618	618.61804_15.987	Cer 41:1;2O|Cer 17:1;2O/24:0	[M+H-H2O]+	adduct linked to 545_[M+H]+; adduct linked to 600_[M+Na]+; similar chromatogram in higher mz_642	1	True	13.09	618.618	C41H81NO3	Cer_NS	OWQPALVMZWREMV-UHFFFAOYSA-N	O=C(NC(CO)C(O)C=CCCCCCCCCCCCC)CCCCCCCCCCCCCCCCCCCCCCC	410	True	True	True		False	False	null	null	100	100	75.5	87.5	100	43.87	Lipidomics_pos_AH_05	618.617:2158 619.62035:1178 620.62371:463	227.12701:27 238.25331:64 250.25259:433 254.24312:36 268.26233:61 354.36972:30 588.60632:57 600.56714:37 618.56946:124	4061.7	4053.19	3793.62	4085.11	4591.49	2396.43	2710.71	2282.14	2585.71	2873.21	2265	1902	1688	1913	2066	4117.45	2569.64
500	14.297	619.469	619.46893_14.297	w/o MS2:SL 12:1;O/21:1;O	[M+H]+		0.867	True	8.18	619.471	C33H63NO6S	SL	SBRPSVARNHFUFG-UHFFFAOYSA-N	O=C(N(CC(O)C=CCCCCCCC)CS(=O)(=O)O)C(O)CCCCCCCCC=CCCCCCCCCC	530	True	True	False		False	False	null	null	98.1	99.8	null	null	null	34.24	Lipidomics_pos_CON_02	619.46893:2080 620.47228:918 621.47564:0	284.26642:42 619.46826:2164	2704.26	2440.43	2697.87	3070.21	2955.32	2585.71	3169.64	2698.21	2400	2726.79	1890	2080	2026	1751	1737	2773.64	2716.36
501	15.415	619.525	619.52496_15.415	DG 34:0	[M+Na]+	ion correlated with 563; ion correlated with 382; adduct linked to 493_[M+NH4]+; adduct linked to 382_[M+H-H2O]+	0.733	True	12.61	619.527	C37H72O5	DG	SSJMMYPUZPYGQU-UHFFFAOYSA-N	O=C(OCC(OC(=O)CCCCCCC)CO)CCCCCCCCCCCCCCCCCCCCCCCCC	420	True	True	True		False	False	null	null	100	100	73.9	75	100	55.86	Lipidomics_pos_CON_02	619.52588:3949 620.52923:1982 621.53259:570	429.2392:18 619.52765:872	2072.34	2010.64	1872.34	2404.26	2085.11	2571.43	3153.57	2796.43	2491.07	3017.86	4292	3949	4235	4258	4063	2088.51	2805.76
502	1.879	620.319	620.31854_1.879	w/o MS2:RIKEN P-VS1 ID-6200 from Mouse_Plasma_ApoEKO_N_F1DHA	[M+H]+	ion correlated with 2150	0.333	True	6.4	620.317		Unknown			530	True	True	False		False	False	null	null	98.9	99.9	null	null	null	122.12	Lipidomics_pos_AH_04	620.31854:5641 621.32189:1691 622.32525:610	184.07283:1025 340.11243:53 504.23642:52	10208.5	9678.72	10708.5	12002.1	10321.3	1746.43	1578.57	1371.43	1126.79	1407.14	625	640	635	604	592	10583.8	1446.25
503	14.979	620.596	620.59552_14.979	Cer 40:2;2O|Cer 18:2;2O/22:0	[M+H]+	adduct linked to 441_[M+H-H2O]+	0.933	True	12.44	620.598	C40H77NO3	Cer_NS	AWTNSRHUZXWBCO-UHFFFAOYSA-N	O=C(NC(CO)C(O)C=CCCC=CCCCCCCCCC)CCCCCCCCCCCCCCCCCCCCC	410	True	True	True		False	False	null	null	100	100	91.2	72.4	100	37.67	Lipidomics_pos_AH_02	620.59552:2173 621.59887:1035 622.60223:362	236.22362:12 236.23804:117 262.25235:1820 280.26318:286 572.57611:58 584.57544:340 620.59314:133	3878.72	4623.4	3857.45	4521.28	4019.15	2216.07	2650	2183.93	2516.07	2716.07	1909	1718	1774	1800	1610	4180.29	2456.74
504	14.309	621.448	621.44812_14.309	DG 35:6	[M+Na]+		1	True	9.35	621.449	C38H62O5	DG	CNCIBIDVDQXZJT-UHFFFAOYSA-N	O=C(OCC(OC(=O)CCCCCCC=CCC=CCC=CCC=CCC=CCC=CCC)CO)CCCCCCCC	420	True	True	True		False	False	null	null	100	99.9	75	75	100	74.08	Lipidomics_pos_CON_05	621.44916:2714 622.45251:1459 623.45587:524	621.45154:3542	6240.43	17563.8	6610.64	19980.9	11063.8	6075	7425	6900	5437.5	6757.14	2384	3312	2555	2101	2714	12292.1	6519.2
505	16.136	621.521	621.52057_16.136	w/o MS2:NAGly 9:0;O(FA 26:3)	[M+H]+	ion correlated with 339; ion correlated with 391; ion correlated with 456	0.333	True	9.27	621.52	C37H65NO5	NAGly	ROILSTDMWXVRLT-UHFFFAOYSA-N	O=C(O)CNC(=O)CCCC(OC(=O)CCCCCCCCCCC=CCC=CCC=CCCCCCCC)CCCC	530	True	True	False		False	False	null	null	99.9	99.8	null	null	null	31.76	Lipidomics_pos_CON_01	621.52057:1768 622.52392:867 623.52728:273	621.23969:40 621.51862:1654	340.426	263.83	287.234	302.128	251.064	467.857	578.571	451.786	532.143	698.214	1768	1536	1546	1655	1692	288.856	545.692
506	4.855	622.406	622.40601_4.855	w/o MS2:SL 13:1;O/22:5;O	[M+H]+		0.067	True	7.24	622.414	C35H59NO6S	SL	JPXQPZDAJLAFIA-UHFFFAOYSA-N	O=C(N(CC(O)C=CCCCCCCCC)CS(=O)(=O)O)C(O)CCCCC=CCC=CCC=CCC=CCC=CCC	530	True	True	False		False	False	null	null	83.1	100	null	null	null	16.06	Lipidomics_pos_AH_04	622.40601:1199 623.40936:324 624.41272:157	104.10505:9 177.11327:21 590.20441:17 622.40955:1145	2223.4	2389.36	2046.81	2551.06	2276.6	1083.93	1037.5	1103.57	1116.07	1117.86	714	634	685	652	598	2297.18	1091.74
507	3.778	622.406	622.40631_3.778	w/o MS2:SL 13:1;O/22:5;O	[M+H]+		0.667	True	7.24	622.414	C35H59NO6S	SL	JPXQPZDAJLAFIA-UHFFFAOYSA-N	O=C(N(CC(O)C=CCCCCCCCC)CS(=O)(=O)O)C(O)CCCCC=CCC=CCC=CCC=CCC=CCC	530	True	True	False		False	False	null	null	84.3	99.9	null	null	null	22.96	Lipidomics_pos_AH_04	622.40631:2693 623.40966:1217 624.41302:224	146.98257:20 496.33624:23	5042.55	5451.06	4885.11	5729.79	5631.91	2342.86	2578.57	2451.79	2476.79	2776.79	2163	1914	1812	1853	1758	5347.74	2525.18
508	15.662	622.612	622.612_15.662	Cer 40:1;2O|Cer 18:1;2O/22:0	[M+H]+	adduct linked to 453_[M+H-H2O]+; similar chromatogram in higher mz_605	1	True	13.02	622.613	C40H79NO3	Cer_NS	KEPQASGDXIEOIL-UHFFFAOYSA-N	O=C(NC(CO)C(O)C=CCCCCCCCCCCCCC)CCCCCCCCCCCCCCCCCCCCC	410	True	True	True		False	False	null	null	100	100	78.1	52.7	100	212.3	Lipidomics_pos_CON_03	622.61176:6936 623.61511:3504 624.61847:836	252.26646:85 264.26816:1354 604.60107:924	13495.7	14961.7	11644.7	15789.4	13366	9880.36	12671.4	11164.3	12239.3	12900	8687	7604	6936	7077	7642	13851.5	11771.1
509	11.659	623.502	623.50226_11.659	w/o MS2:SL 12:0;O/21:0;O	[M+H]+	found in higher mz's MsMs_1041	0.467	True	8.47	623.503	C33H67NO6S	SL	ZUSITHWKKRSQAW-UHFFFAOYSA-N	O=C(N(CC(O)CCCCCCCCC)CS(=O)(=O)O)C(O)CCCCCCCCCCCCCCCCCCC	530	True	True	False		False	False	null	null	99.9	99.9	null	null	null	29.35	Lipidomics_pos_CON_03	623.50226:3227 624.50561:1278 625.50897:0	79.0532:46 109.10032:91 195.06461:44 621.41858:27 623.50146:2812	1663.83	2180.85	1459.57	2138.3	1597.87	1669.64	1607.14	1583.93	1510.71	1957.14	2580	2115	3227	2750	2295	1807.9	1665.74
510	13.396	624.42	624.41956_13.396	Unknown	[M+NH4]+	adduct linked to 474_[M+H]+	0.067	True	null	null	null	null	null	null	999	False	False	False		False	False	null	null	null	null	null	null	null	25.49	Lipidomics_pos_BL_05	624.41956:1076 625.42291:0 626.42627:0	551.32947:386	1308.51	1217.02	700	1080.85	1193.62	1092.86	608.929	1437.5	1594.64	1921.43	746	307	527	626	449	1099.95	1331.25
511	15.958	624.627	624.62726_15.958	w/o MS2:Cer 18:0;2O/22:0	[M+H]+		0.4	True	13.25	624.629	C40H81NO3	Cer_NDS	SXPRAKSDHOEHIG-UHFFFAOYSA-N	O=C(NC(CO)C(O)CCCCCCCCCCCCCCC)CCCCCCCCCCCCCCCCCCCCC	530	True	True	False		False	False	null	null	63.9	100	null	null	null	38.75	Lipidomics_pos_BL_05	624.62726:2326 625.63061:916 626.63397:336	97.1017:36 151.14825:10 254.28625:22 256.26309:58 274.27301:17 588.5788:14 606.55688:27 607.61749:26 624.62701:2749	2040.43	2646.81	1810.64	2265.96	2308.51	3300	3569.64	3864.29	4126.79	4153.57	815	753	742	716	903	2214.76	3802.97
512	21.539	625.275	625.27454_21.539	Unknown	[M+H]+	adduct linked to 468_[M+H-H2O]+; found in higher mz's MsMs_586	0.133	True	null	null	null	null	null	null	999	False	False	False		False	False	null	null	null	null	null	null	null	8.96	Lipidomics_pos_BL_05	625.27454:4440 626.27789:3394 627.28125:784	397.20813:22 413.20059:41 625.27673:198	4893.62	8978.72	4095.74	3187.23	3604.26	2921.43	3446.43	3896.43	3333.93	7928.57	3388	2471	1862	2365	2380	4952.07	4305.13
513	10.59	625.518	625.51794_10.59	Unknown	[M+H]+	found in higher mz's MsMs_1868; found in higher mz's MsMs_1802	1	True	null	null	null	null	null	null	999	False	False	False		False	False	null	null	null	null	null	null	null	169.67	Lipidomics_pos_AH_01	625.51788:4730 626.52123:2009 627.52459:510	93.07018:20 109.09853:10 184.07092:13 265.25613:10 413.20859:30 623.19867:11 625.5177:475	10063.8	13531.9	10425.5	13493.6	10531.9	7807.14	8294.64	7871.43	8701.79	8692.86	11570	9899	12831	11376	11851	11609.1	8274.11
514	12.026	625.519	625.51855_12.026	Unknown	[M+H]+		1	True	null	null	null	null	null	null	999	False	False	False		False	False	null	null	null	null	null	null	null	96.04	Lipidomics_pos_AH_01	625.51782:1661 626.52117:906 627.52453:1327	91.05245:113 265.24695:69 339.2644:195 397.2056:96 607.25336:217 625.27655:809	3534.04	4517.02	3474.47	3642.55	3568.09	5983.93	6166.07	6301.79	7332.14	6605.36	6658	6349	7114	6699	6784	3746.86	6477.59
515	18.042	626.276	626.27625_18.042	Unknown	[M+NH4]+	adduct linked to 479_[M+H]+	0.067	False	null	null	null	null	null	null	999	False	False	False		False	False	null	null	null	null	null	null	null	11.42	Lipidomics_pos_AH_05	626.27625:1759 627.2796:680 628.28296:163		1231.91	1587.23	1493.62	1412.77	3742.55	1232.14	1550	1478.57	1092.86	1362.5	934	752	811	748	860	1893.48	1343.53
516	14.367	626.534	626.53406_14.367	TG 34:1|TG 8:0_8:0_18:1	[M+NH4]+		1	True	9.65	626.535	C37H68O6	TG	ZKXNUZKNXJQKHH-UHFFFAOYSA-N	O=C(OCC(OC(=O)CCCCCCC)COC(=O)CCCCCCCC=CCCCCCCCC)CCCCCCC	410	True	True	True		False	False	null	null	100	99.9	50.9	63.7	100	31.69	Lipidomics_pos_AH_04	626.53406:4332 627.53741:2251 628.54077:1330	69.06887:37 237.22278:30 265.25275:64 327.25198:1095 355.28317:124 409.33069:250 437.34344:175 465.37701:94 465.39343:204 626.23157:72 626.53796:797	2289.36	8431.91	2506.38	9217.02	4380.85	2391.07	2630.36	2805.36	1992.86	2523.21	1637	2082	1433	1279	1558	5365.85	2468.64
517	11.065	627.532	627.53247_11.065	Unknown	[M+H]+	found in higher mz's MsMs_1873	0.267	True	null	null	null	null	null	null	999	False	False	False		False	False	null	null	null	null	null	null	null	67.49	Lipidomics_pos_CON_04	627.53247:3627 628.53582:2528 629.53918:427	83.08598:52 196.0685:66 609.26477:47	1493.62	1727.66	1619.15	1970.21	1853.19	1835.71	1933.93	2050	1876.79	1953.57	3092	3362	3090	3627	3426	1732.63	1930.25
518	12.983	627.534	627.53351_12.983	RIKEN P-VS1 ID-6350 from Mouse_Macrophage_WT_N_F1AA	[M+H]+	ion correlated with 827; ion correlated with 378; ion correlated with 893; similar chromatogram in higher mz_1071; found in higher mz's MsMs_1071; similar chromatogram in higher mz_1086; similar chromatogram in higher mz_2195	1	True	8.62	627.541		Unknown			430	True	True	True		False	False	null	null	82.3	99.9	84.5	88.7	66.7	260.74	Lipidomics_pos_BL_02	627.53314:6949 628.53649:3957 629.53985:1140	83.08495:92 203.17789:129 341.30298:232 627.5296:693	13880.9	16593.6	16338.3	17021.3	16017	11530.4	12408.9	12285.7	14053.6	14382.1	20548	18904	21031	20112	18094	15970.4	12932.6
519	11.605	627.534	627.53369_11.605	RIKEN P-VS1 ID-6350 from Mouse_Macrophage_WT_N_F1AA	[M+H]+	similar chromatogram in higher mz_1891; similar chromatogram in higher mz_675; found in higher mz's MsMs_1874; similar chromatogram in higher mz_1814; found in higher mz's MsMs_1891; similar chromatogram in higher mz_1561	1	True	8.62	627.541		Unknown			430	True	True	True		False	False	null	null	87.4	100	87	89.5	100	1727.82	Lipidomics_pos_BL_04	627.53345:44398 628.5368:25641 629.54016:4914	71.0855:55 109.10075:58 201.15761:26 203.17886:204 341.30441:1078 395.31705:48 627.53351:3237	168394	187057	168500	193389	163696	74778.6	78273.2	80101.8	79282.1	87405.4	86908	93746	99234	99469	86954	176207	79968.1
520	14.319	628.548	628.54803_14.319	w/o MS2:TG 8:0_8:0_18:0	[M+H]+		0.133	False	10.39	628.551	C37H70O6	TG	MZOBWBAHWLTJCC-UHFFFAOYSA-N	O=C(OCC(OC(=O)CCCCCCC)COC(=O)CCCCCCCCCCCCCCCCC)CCCCCCC	530	True	True	False		False	False	null	null	95.5	99.9	null	null	null	18.94	Lipidomics_pos_AH_02	628.54803:1689 629.55138:794 630.55474:253		1317.02	3593.62	1400	4214.89	2695.74	1087.5	1269.64	1332.14	1098.21	1458.93	649	700	640	524	637	2644.87	1249.17
521	15.127	628.55	628.54999_15.127	TG 34:0|TG 10:0_10:0_14:0	[M+NH4]+	ion correlated with 573; adduct linked to 536_[M+Na]+; similar chromatogram in higher mz_573	1	True	11.23	628.551	C37H70O6	TG	ANPBNWKAHAXTFP-UHFFFAOYSA-N	O=C(OCC(OC(=O)CCCCCCCCC)COC(=O)CCCCCCCCCCCCC)CCCCCCCCC	410	True	True	True		False	False	null	null	100	99.9	37.3	85.3	100	141.39	Lipidomics_pos_AH_05	628.54993:11315 629.55328:5490 630.55664:1199	97.10026:47 155.14143:32 250.25073:49 262.25171:1074 341.29648:18 383.31345:146 439.37549:331 593.53687:44 628.5321:71	13923.4	38838.3	13634	43593.6	24074.5	11707.1	13589.3	14094.6	11057.1	14082.1	8391	10130	7443	6423	8750	26812.6	12906
522	14.934	628.6	628.60016_14.934	Cer 42:3;2O|Cer 18:2;2O/24:1	[M+H-H2O]+	adduct linked to 627_[M+H]+	1	True	12.67	628.603	C42H79NO3	Cer_NS	RYZWCKUTHDRXFD-UHFFFAOYSA-N	O=C(NC(CO)C(O)C=CCCC=CCCCCCCCCC)CCCCCCCCCCCC=CCCCCCCCCCC	410	True	True	True		False	False	null	null	100	100	42.8	67.1	100	123.72	Lipidomics_pos_AH_02	628.59918:2869 629.60253:2392 630.60589:671	250.2502:36 262.25323:347 383.31253:169 411.34537:291 610.58954:53 610.60541:31	6287.23	6104.26	5961.7	6195.74	6523.4	3446.43	3585.71	3180.36	3617.86	4155.36	2654	2354	2341	2522	2236	6214.6	3597.25
523	13.659	629.548	629.54822_13.659	w/o MS2:RIKEN P-VS1 ID-6396 from Cell_C2C12_WT_N_12hCtr	[M+H]+		0.267	True	13.01	629.547		Unknown			530	True	True	False		False	False	null	null	99.6	100	null	null	null	43.46	Lipidomics_pos_CON_01	629.54602:2168 630.54937:1256 631.55273:1342	71.08523:99 93.06916:95 145.10088:82 267.25183:37 339.29837:25 463.3844:30	2808.51	2278.72	2185.11	3602.13	2985.11	1162.5	1410.71	1244.64	1507.14	1901.79	2168	2062	2626	2659	2281	2771.7	1445.71
524	13.381	629.549	629.54919_13.381	w/o MS2:RIKEN P-VS1 ID-6396 from Cell_C2C12_WT_N_12hCtr	[M+H]+	found in higher mz's MsMs_1089; similar chromatogram in higher mz_721; similar chromatogram in higher mz_1107; similar chromatogram in higher mz_1282	0.733	True	13.01	629.547		Unknown			530	True	True	False		False	False	null	null	98.7	100	null	null	null	50.01	Lipidomics_pos_CON_01	629.54919:4788 630.55254:2093 631.5559:674	561.50323:120	3885.11	3868.09	2893.62	3395.74	3421.28	2869.64	3196.43	2857.14	2121.43	2946.43	4788	3874	4091	4339	4472	3492.34	2798.06
525	12.02	629.549	629.54926_12.02	w/o MS2:RIKEN P-VS1 ID-6396 from Cell_C2C12_WT_N_12hCtr	[M+H]+	similar chromatogram in higher mz_1899; found in higher mz's MsMs_1899	1	True	13.01	629.547		Unknown			530	True	True	False		False	False	null	null	98.7	100	null	null	null	352.86	Lipidomics_pos_CON_03	629.54926:34691 630.55261:19260 631.55597:4413	79.05436:289 93.06974:866 113.13261:61 159.11874:164 179.1434:101 249.25485:108 341.30597:203	21534	23919.1	21319.1	21748.9	21351.1	21139.3	19901.8	20701.8	22183.9	20725	32186	29314	34691	31690	33582	21975	20930.6
526	12.352	629.549	629.54938_12.352	w/o MS2:RIKEN P-VS1 ID-6396 from Cell_C2C12_WT_N_12hCtr	[M+H]+	found in higher mz's MsMs_1880	1	True	13.01	629.547		Unknown			530	True	True	False		False	False	null	null	98.5	100	null	null	null	232.67	Lipidomics_pos_CON_04	629.54938:27864 630.55273:14260 631.55609:3930	69.06928:186 149.1317:105 205.19531:224 267.26746:210 629.54932:3695	12406.4	12306.4	10863.8	12908.5	13078.7	8308.93	9932.14	9364.29	9694.64	9178.57	24679	26006	23059	27864	24010	12312.6	9295.83
527	15.598	630.617	630.61731_15.598	Cer 42:2;2O|Cer 18:1;2O/24:1	[M+H-H2O]+	adduct linked to 632_[M+Na]+; found in higher mz's MsMs_700; adduct linked to 572_[M+H]+	1	True	13.03	630.618	C42H81NO3	Cer_NS	HZPUWSUHFOTSAY-UHFFFAOYSA-N	O=C(NC(CO)C(O)C=CCCCCCCCCCCCCC)CCCCCCCCCCCC=CCCCCCCCCCC	410	True	True	True		False	False	null	null	100	100	78.2	64.8	100	341.37	Lipidomics_pos_AH_01	630.61725:10625 631.6206:7044 632.62396:1811	236.2332:13 252.26788:126 264.26797:874 612.60779:102 630.61566:718	22606.4	25846.8	20338.3	24910.6	24144.7	15578.6	17385.7	17364.3	16996.4	19557.1	18896	15492	14769	15859	15785	23569.3	17376.3
528	11.044	631.296	631.29596_11.044	Unknown	[M+H]+		0.067	True	null	null	null	null	null	null	999	False	False	False		False	False	null	null	null	null	null	null	null	19.23	Lipidomics_pos_BL_02	631.29596:1090 632.29931:613 633.30267:104	631.29114:202	1372.34	680.851	436.17	519.149	372.34	510.714	1946.43	578.571	687.5	373.214	358	269	204	248	199	676.41	819.308
529	14.015	631.469	631.46899_14.015	w/o MS2:SL 12:1;O/22:2;O	[M+H]+		1	True	7.89	631.471	C34H63NO6S	SL	PIJPZPAYKACGKK-UHFFFAOYSA-N	O=C(N(CC(O)C=CCCCCCCC)CS(=O)(=O)O)C(O)CCCCCCCCCCC=CCC=CCCCCC	530	True	True	False		False	False	null	null	98.2	99.8	null	null	null	77.67	Lipidomics_pos_BL_05	631.46899:4404 632.47234:2294 633.4757:845	83.0878:63 293.28973:145 631.47095:3136	5921.28	6834.04	6055.32	8323.4	6782.98	6730.36	7312.5	6616.07	6525	7864.29	3331	3814	3252	2956	2947	6783.56	7009.89
530	12.74	631.565	631.56482_12.74	w/o MS2:RIKEN P-VS1 ID-6428 from Cell_C2C12_WT_N_4hCtr	[M+H]+		0.4	False	13.23	631.562		Unknown			530	True	True	False		False	False	null	null	96.1	100	null	null	null	92.62	Lipidomics_pos_CON_01	631.56482:5888 632.56817:3111 633.57153:0		734.043	546.809	1417.02	976.596	1261.7	2385.71	2328.57	2135.71	2060.71	2039.29	5888	5073	4504	5071	5426	987.394	2189.67
531	13.891	631.566	631.56586_13.891	w/o MS2:RIKEN P-VS1 ID-6428 from Cell_C2C12_WT_N_4hCtr	[M+H]+	ion correlated with 492; ion correlated with 2197	0.067	True	13.23	631.562		Unknown			530	True	True	False		False	False	null	null	95.5	100	null	null	null	42.45	Lipidomics_pos_CON_01	631.56586:1472 632.56921:1177 633.57257:330	563.46167:66 631.56189:1879	778.723	921.277	859.574	829.787	897.872	660.714	666.071	594.643	960.714	598.214	1472	1227	1158	1123	1090	857.819	696.295
532	14.955	632.536	632.53601_14.955	w/o MS2:SE 28:2/15:4	[M+H]+		0.4	True	13.25	632.54	C43H66O2	BRSE	HARUMECBMCRICT-UHFFFAOYSA-N	O=C(OC1CC2=CCC3C(CCC4(C)C(CCC34)C(C=CC(C)C(C)C)C)C2(C)CC1)CC=CCC=CCC=CCC=CCC	530	True	True	False		False	False	null	null	64.3	100	null	null	null	30.6	Lipidomics_pos_CON_01	632.53601:1228 633.53936:651 634.54272:246	632.53528:2095	2051.06	2038.3	1770.21	1859.57	2108.51	1976.79	2176.79	1982.14	2046.43	2107.14	1228	1099	1035	1151	1170	1965.74	2058.1
533	16.29	632.633	632.63269_16.29	Cer 42:1;2O|Cer 18:1;2O/24:0	[M+H-H2O]+	ion correlated with 581; adduct linked to 581_[M+H]+; adduct linked to 636_[M+Na]+; similar chromatogram in higher mz_685; found in higher mz's MsMs_581; similar chromatogram in higher mz_1171	1	True	13.26	632.634	C42H83NO3	Cer_NS	ZJVVOYPTFQEGPH-UHFFFAOYSA-N	O=C(NC(CO)C(O)C=CCCCCCCCCCCCCC)CCCCCCCCCCCCCCCCCCCCCCC	410	True	True	True		False	False	null	null	100	100	76.8	56.9	100	281.85	Lipidomics_pos_AH_05	632.63257:7651 633.63592:4428 634.63928:1896	252.26724:70 264.26804:704 602.6264:37 632.63214:459	14693.6	17934	11657.4	16980.9	16278.7	11450	13328.6	12921.4	15439.3	16200	18922	14831	14260	14355	15411	15508.8	13867.9
534	6.084	633.434	633.43372_6.084	w/o MS2:SL 12:2;O/24:6	[M+H]+		0.2	True	7.22	633.43	C36H57NO5S	SL	OCXFBNBUAPFFHJ-UHFFFAOYSA-N	O=C(N(CC(O)C=CCCC=CCCC)CS(=O)(=O)O)CCCCC=CCC=CCC=CCC=CCC=CCC=CCC	530	True	True	False		False	False	null	null	94.9	100	null	null	null	23.81	Lipidomics_pos_CON_02	633.43372:1665 634.43707:489 635.44043:299	250.16119:23 633.43311:3396	2170.21	2170.21	1914.89	1527.66	1151.06	1642.86	2005.36	1316.07	1132.14	982.143	912	1665	778	648	761	1786.81	1416.32
535	14.69	633.485	633.48468_14.69	w/o MS2:SL 12:1;O/22:1;O	[M+H]+	ion correlated with 490	1	True	8.2	633.487	C34H65NO6S	SL	WOKZAGXRGUEHSU-UHFFFAOYSA-N	O=C(N(CC(O)C=CCCCCCCC)CS(=O)(=O)O)C(O)CCCCCCCCCCC=CCCCCCCCC	530	True	True	False		False	False	null	null	98.2	99.8	null	null	null	212.26	Lipidomics_pos_CON_01	633.48468:20050 634.48803:10328 635.49139:3225	127.11013:25 377.27319:43 615.62646:32	11708.5	13546.8	10470.2	15891.5	12544.7	15708.9	18512.5	15687.5	16492.9	18983.9	20050	18461	17489	17731	17320	12832.5	17077.4
536	15.124	633.505	633.50482_15.124	w/o MS2:TG 8:0_8:0_18:0	[M+Na]+	adduct linked to 521_[M+NH4]+	0.933	True	10.39	633.506	C37H70O6	TG	MZOBWBAHWLTJCC-UHFFFAOYSA-N	O=C(OCC(OC(=O)CCCCCCC)COC(=O)CCCCCCCCCCCCCCCCC)CCCCCCC	530	True	True	False		False	False	null	null	99.2	99.9	null	null	null	53.69	Lipidomics_pos_AH_04	633.50482:5069 634.50817:2370 635.51153:634	545.45953:52	3453.19	9040.43	3651.06	10785.1	6051.06	3332.14	3808.93	3932.14	3219.64	3985.71	2328	2762	2256	1711	2425	6596.22	3655.67
537	13.798	634.542	634.54211_13.798	w/o MS2:DG 16:0_20:4	[M+H]+		0.067	True	10.68	634.541	C39H68O5	DG	GYMMHHODMBOFGD-UHFFFAOYSA-N	O=C(OCC(OC(=O)CCCCCCC=CCC=CCC=CCC=CCC)CO)CCCCCCCCCCCCCCC	530	True	True	False		False	False	null	null	71.7	100	null	null	null	21.67	Lipidomics_pos_CON_04	634.54211:1104 635.54546:527 636.54882:292	171.11432:36 203.17967:214 255.22862:85 271.23679:63 313.27335:1372 599.50775:222 634.547:202	1582.98	1261.7	1421.28	1461.7	1595.74	1089.29	1085.71	853.571	1014.29	1150	941	1000	853	1104	877	1464.97	1038.42
538	15.26	634.612	634.61169_15.26	w/o MS2:Cer 12:0;2O/29:1;O	[M+H]+	adduct linked to 496_[M+H-H2O]+	0.6	True	12.57	634.613	C41H81NO4	Cer_HDS	BTZWDXQUICFDFD-UHFFFAOYSA-N	O=C(NC(CO)C(O)CCCCCCCCC)C(O)CCCCCCCCCCCCCCCC=CCCCCCCCCCC	530	True	True	False		False	False	null	null	99.2	100	null	null	null	30.75	Lipidomics_pos_AH_04	634.61169:1523 635.61504:704 636.6184:265	184.06879:35 226.94899:55 377.26816:35 586.55829:25 616.60162:2607 634.50916:680	2689.36	2757.45	2455.32	3240.43	2959.57	1532.14	1719.64	1748.21	1757.14	2067.86	1283	1142	1341	1248	1358	2820.43	1764.87
539	15.415	635.5	635.50006_15.415	w/o MS2:SL 12:1;O/22:0;O	[M+H]+		1	True	8.37	635.503	C34H67NO6S	SL	NHZIMRDKTSMOEG-UHFFFAOYSA-N	O=C(N(CC(O)C=CCCCCCCC)CS(=O)(=O)O)C(O)CCCCCCCCCCCCCCCCCCCC	530	True	True	False		False	False	null	null	97.9	99.8	null	null	null	88.04	Lipidomics_pos_CON_03	635.50006:8479 636.50341:4533 637.50677:1412	617.60083:27 635.49994:385	3625.53	3829.79	3753.19	4551.06	4310.64	5189.29	6041.07	5285.71	5082.14	6203.57	7876	7141	8479	7424	7454	4014.18	5560.09
540	13.155	635.538	635.53809_13.155	w/o MS2:SL 12:0;O/23:0	[M+H]+	found in higher mz's MsMs_1129	0.333	True	10.29	635.539	C35H71NO5S	SL	OVQSHTBFPYXEQE-UHFFFAOYSA-N	O=C(N(CC(O)CCCCCCCCC)CS(=O)(=O)O)CCCCCCCCCCCCCCCCCCCCCC	530	True	True	False		False	False	null	null	99.7	100	null	null	null	14.28	Lipidomics_pos_CON_02	635.53809:1583 636.54144:734 637.5448:358	79.05449:183 109.10124:147 163.15154:51 307.29941:428 635.51678:870	1048.94	1265.96	895.745	1317.02	946.809	525	542.857	492.857	675	608.929	1467	1583	1046	1362	1283	1094.39	568.594
541	2.65	636.305	636.30487_2.65	Unknown	[M+H]+	ion correlated with 2146	0.067	True	null	null	null	null	null	null	999	False	False	False		False	False	null	null	null	null	null	null	null	32.53	Lipidomics_pos_AH_04	636.30487:1006 637.30822:584 638.31158:186	552.34528:32 636.30481:1961	1655.32	1923.4	1385.11	2140.43	2138.3	283.929	298.214	294.643	353.571	387.5	196	258	264	226	190	1848.3	323.683
542	4.098	636.422	636.42249_4.098	w/o MS2:SL 12:1;O/24:5;O	[M+H]+		0.267	True	7.51	636.429	C36H61NO6S	SL	OHXVXCGAEFWBJJ-UHFFFAOYSA-N	O=C(N(CC(O)C=CCCCCCCC)CS(=O)(=O)O)C(O)CCCCCCC=CCC=CCC=CCC=CCC=CCC	530	True	True	False		False	False	null	null	87	99.9	null	null	null	25.1	Lipidomics_pos_CON_01	636.42249:1593 637.42584:696 638.4292:121	184.03069:18 380.186:8 453.36066:20 636.42377:2476	2419.15	2823.4	2587.23	2902.13	2712.77	1528.57	1375	1528.57	1501.79	1726.79	1593	1557	1377	1508	1427	2689.2	1531.94
543	9.871	636.495	636.49493_9.871	LPC 26:0	[M+H]+		1	True	8.6	636.496	C34H70NO7P	LPC	WSDKRPCAPHRNNZ-UHFFFAOYSA-N	O=C(OCC(O)COP(=O)([O-])OCC[N+](C)(C)C)CCCCCCCCCCCCCCCCCCCCCCCCC	410	True	True	True		False	False	null	null	100	100	85.2	76.9	100	25.25	Lipidomics_pos_CON_02	636.49493:3284 637.49828:1282 638.50164:337	125.00189:13 184.05492:13 184.07231:565 636.33453:14 636.4173:14 636.49493:160	3242.55	3859.57	3140.43	3768.09	3140.43	2553.57	2503.57	2535.71	2762.5	2798.21	3314	3284	3099	3377	3240	3429.6	2630.65
544	14.038	636.555	636.55463_14.038	DG 36:3|DG 18:1_18:2	[M+NH4]+		0.733	True	11.05	636.556	C39H70O5	DG	BLZVZPYMHLXLHG-UHFFFAOYSA-N	O=C(OCC(OC(=O)CCCCCCCC=CCC=CCCCCC)CO)CCCCCCCC=CCCCCCCCC	410	True	True	True		False	False	null	null	100	100	70.9	66.8	100	22.43	Lipidomics_pos_BL_03	636.55511:1447 637.55846:841 638.56182:395	151.14738:71 245.22385:121 337.27191:1259 339.2868:1005 636.54779:324	2217.02	3174.47	2127.66	3668.09	3280.85	2730.36	2873.21	2583.93	2873.21	3039.29	1478	1490	1233	1191	1325	2893.72	2819.82
545	15.987	636.628	636.62756_15.987	Cer 41:1;2O|Cer 17:1;2O/24:0	[M+H]+	adduct linked to 499_[M+H-H2O]+; similar chromatogram in higher mz_642	1	True	13.09	636.629	C41H81NO3	Cer_NS	OWQPALVMZWREMV-UHFFFAOYSA-N	O=C(NC(CO)C(O)C=CCCCCCCCCCCCC)CCCCCCCCCCCCCCCCCCCCCCC	410	True	True	True		False	False	null	null	100	100	48.6	63.9	100	32.76	Lipidomics_pos_BL_03	636.62762:1508 637.63097:802 638.63433:243	211.20461:16 238.25272:42 250.25211:373 252.26759:115 354.35928:27 588.60742:53 618.56958:79 636.52368:120	3936.17	4774.47	3274.47	4517.02	4714.89	2237.5	2864.29	2692.86	3025	3032.14	2271	1746	1832	1860	1933	4243.86	2770.25
546	16.881	636.664	636.66382_16.881	Unknown	[M+H]+		0.267	True	null	null	null	null	null	null	999	False	False	False		False	False	null	null	null	null	null	null	null	14.89	Lipidomics_pos_CON_01	636.66412:1225 637.66747:884 638.67083:198	97.1005:28 165.16364:44 368.36932:18 618.65302:336 636.42633:56 636.66272:1899	759.574	942.553	676.596	900	753.191	675	803.571	646.429	726.786	803.571	1225	1044	1244	1141	1317	806.25	730.603
547	3.307	638.321	638.32056_3.307	w/o MS2:RIKEN P-VS1 ID-6544 from Mouse_Muscle_WT_CTX1_Ctr	[M+H]+		0.067	True	5.27	638.326		Unknown			530	True	True	False		False	False	null	null	92.8	100	null	null	null	56.69	Lipidomics_pos_AH_04	638.32056:1081 639.32391:474 640.32727:137	455.25089:31 579.24707:430 638.32092:1722	1931.91	1746.81	1731.91	2300	1985.11	358.929	280.357	316.071	257.143	285.714	142	178	161	152	181	1938.78	299.554
548	14.722	638.572	638.57184_14.722	DG 36:2|DG 18:1_18:1	[M+NH4]+	ion correlated with 398; ion correlated with 375; ion correlated with 1397; ion correlated with 602; adduct linked to 443_[M+H-H2O]+; adduct linked to 557_[M+Na]+	1	True	12.14	638.572	C39H72O5	DG	AFSHUZFNMVJNKX-UHFFFAOYSA-N	O=C(OCC(OC(=O)CCCCCCCC=CCCCCCCCC)CO)CCCCCCCC=CCCCCCCCC	410	True	True	True		False	False	null	null	100	100	56.3	67.7	100	82.05	Lipidomics_pos_CON_04	638.5705:6538 639.57385:3730 640.57721:1188	74.0975:37 177.16278:52 339.28925:3404 603.49823:77 621.54272:297 638.57379:418	4859.57	6331.91	4527.66	7472.34	5582.98	6278.57	7201.79	6948.21	6446.43	7435.71	6993	6425	6505	6538	6251	5755.29	6862.32
549	11.875	638.606	638.60565_11.875	DG O-37:2|DG O-23:1_14:1	[M+NH4]+		0.467	True	12.76	638.608	C40H76O4	EtherDG	PFPOOMCESBLNOW-UHFFFAOYSA-N	O=C(OC(CO)COCCCCCCCCCCCC=CCCCCCCCCCC)CCCCCCCC=CCCCC	410	True	True	True		False	False	null	null	100	100	75	67.8	100	34.47	Lipidomics_pos_AH_02	638.60565:1713 639.609:1306 640.61236:374	283.26205:497	2836.17	3644.68	2691.49	2321.28	1680.85	1598.21	2148.21	2785.71	1621.43	2273.21	448	399	262	718	869	2634.23	2085.22
550	14.056	639.568	639.56787_14.056	w/o MS2:NAGly 8:0;O(FA 28:1)	[M+H]+	found in higher mz's MsMs_1163	0.467	True	10.38	639.567	C38H71NO5	NAGly	HFZGODMKWYYISC-UHFFFAOYSA-N	O=C(O)CNC(=O)CCCC(OC(=O)CCCCCCCCCCCCCCCC=CCCCCCCCCCC)CCC	530	True	True	False		False	False	null	null	99.8	99.9	null	null	null	33.17	Lipidomics_pos_CON_03	639.56787:1634 640.57122:1267 641.57458:407	109.10151:94 291.30026:58 639.28601:55 639.53485:300	2123.4	2427.66	2338.3	2531.91	2134.04	714.286	894.643	812.5	885.714	769.643	1535	1533	1634	1564	1614	2311.46	815.781
551	7.709	640.535	640.53497_7.709	w/o MS2:Cer 13:1;3O/28:5;(2OH)	[M+H]+		0.933	True	9.77	640.53	C41H71NO5	Cer_AP	RUFAUONCBRDHJF-UHFFFAOYSA-N	O=C(NC(CO)C(O)C(O)CCCC=CCCCC)C(O)CCCCCCCCCCC=CCC=CCC=CCC=CCC=CCC	530	True	True	False		False	False	null	null	92.5	100	null	null	null	33.23	Lipidomics_pos_CON_02	640.53497:3428 641.53832:1437 642.54168:434	73.06554:8 125.1306:8 427.28607:21 640.53534:351	4255.32	4308.51	3553.19	3604.26	2340.43	2775	4233.93	2557.14	2482.14	2403.57	1816	3428	1567	1446	1547	3612.42	2890.51
552	15.426	640.587	640.58685_15.426	DG 36:1|DG 18:0_18:1	[M+NH4]+	ion correlated with 606; adduct linked to 459_[M+H-H2O]+	1	True	12.94	640.588	C39H74O5	DG	SAEPUUXWQQNLGN-UHFFFAOYSA-N	O=C(OCC(OC(=O)CCCCCCCC=CCCCCCCCC)CO)CCCCCCCCCCCCCCCCC	410	True	True	True		False	False	null	null	100	100	71.8	67.4	100	95.32	Lipidomics_pos_BL_02	640.5871:3995 641.59045:2016 642.59381:610	95.08629:63 125.13293:13 253.27975:19 293.28421:20 327.28656:15 339.28909:1188 341.30527:1552 367.31863:169 535.47327:21 596.59009:34 623.55627:265 640.586:272	3814.89	4478.72	3585.11	5848.94	4553.19	5596.43	7133.93	7167.86	6226.79	8480.36	9844	9062	7788	9305	9493	4456.44	6921.21
553	18.639	640.6	640.59998_18.639	CE 16:1	[M+NH4]+	similar chromatogram in higher mz_678	0.333	True	14.31	640.603	C43H74O2	CE	HODJWNWCVNUPAQ-UHFFFAOYSA-N	O=C(OC1CC2=CCC3C(CCC4(C)C(CCC34)C(C)CCCC(C)C)C2(C)CC1)CCCCCCCC=CCCCCCC	410	True	True	True		False	False	null	null	100	99.9	82.6	79.2	100	22.18	Lipidomics_pos_CON_04	640.60083:1193 641.60418:679 642.60754:224	83.08346:34 133.08543:47 159.11542:30 161.13078:114 203.17863:26 229.19354:85 369.35104:4043 640.57831:102	1110.64	1461.7	1063.83	1031.91	1125.53	1450	1560.71	1371.43	1157.14	1641.07	1130	1258	1284	1193	1418	1158.83	1435.47
554	15.485	642.566	642.56555_15.485	w/o MS2:TG 8:0_8:0_19:0	[M+H]+		0.8	True	11.46	642.567	C38H72O6	TG	BWJWFVJNMKHRCD-UHFFFAOYSA-N	O=C(OCC(OC(=O)CCCCCCC)COC(=O)CCCCCCCCCCCCCCCCCC)CCCCCCC	530	True	True	False		False	False	null	null	99.6	99.9	null	null	null	38.55	Lipidomics_pos_AH_04	642.56555:3640 643.5689:2062 644.57226:432	234.89783:28 642.57886:2026	2495.74	5929.79	2868.09	7744.68	4210.64	2617.86	2791.07	2894.64	2176.79	3064.29	1839	2110	1599	1268	2091	4649.49	2709.02
555	14.99	642.579	642.57861_14.99	w/o MS2:Cer 12:2;2O/28:0	[M+H]+		0.067	True	12.42	642.58	C40H77NO3	Cer_NS	LZVYGWAWYTVVOX-UHFFFAOYSA-N	O=C(NC(CO)C(O)C=CCCC=CCCC)CCCCCCCCCCCCCCCCCCCCCCCCCCC	530	True	True	False		False	False	null	null	77.2	100	null	null	null	27.59	Lipidomics_pos_CON_04	642.57861:1279 643.58196:580 644.58532:195	642.53558:56	2504.26	2761.7	2348.94	2748.94	2602.13	1467.86	1508.93	1462.5	1792.86	1900	1253	1114	1200	1279	1192	2592.93	1626
556	19.156	642.616	642.61627_19.156	CE 16:0	[M+NH4]+	similar chromatogram in higher mz_810	0.133	True	14.78	642.618	C43H76O2	CE	BBJQPKLGPMQWBU-UHFFFAOYSA-N	O=C(OC1CC2=CCC3C(CCC4(C)C(CCC34)C(C)CCCC(C)C)C2(C)CC1)CCCCCCCCCCCCCCC	410	True	True	True		False	False	null	null	100	99.9	83.9	79.6	100	30.14	Lipidomics_pos_CON_05	642.61627:1271 643.61962:816 644.62298:346	83.08635:66 109.10258:42 121.09908:58 201.16466:42 369.3501:4008 642.61383:115	746.809	821.277	612.766	957.447	895.745	1082.14	978.571	1076.79	914.286	1019.64	1015	772	1113	979	1271	806.782	1014.02
557	14.725	643.526	643.52576_14.725	DG 36:2	[M+Na]+	adduct linked to 548_[M+NH4]+	1	True	12.17	643.527	C39H72O5	DG	LWKIYUMZYBCPGM-UHFFFAOYSA-N	O=C(OCC(OC(=O)CCCCCCCCCCCCCCCC=CCC=CCCCCCCC)CO)CCCCCCC	420	True	True	True		False	False	null	null	100	100	75	75	100	52.05	Lipidomics_pos_BL_04	643.52649:1829 644.52984:789 645.5332:317	643.52655:3716	2657.45	2923.4	2382.98	3510.64	3238.3	3505.36	3398.21	3203.57	3266.07	3851.79	3621	3393	3195	3628	2887	2942.29	3444.82
558	12.56	643.565	643.56494_12.56	Unknown	[M+H]+		0.333	True	null	null	null	null	null	null	999	False	False	False		False	False	null	null	null	null	null	null	null	38.4	Lipidomics_pos_CON_01	643.56427:1792 644.56762:1168 645.57098:0	267.26273:52 643.27533:198	1059.57	1202.13	840.426	1180.85	693.617	1296.43	1125	1237.5	1505.36	1557.14	1792	1971	1780	1562	1811	994.973	1344.11
559	1.795	644.319	644.31903_1.795	Unknown	[M+H]+		0.267	True	null	null	null	null	null	null	999	False	False	False		False	False	null	null	null	null	null	null	null	33.22	Lipidomics_pos_AH_01	644.31854:1100 645.32189:393 646.32525:727	184.07304:1856 268.0943:87 327.10867:94 407.16934:52 490.2142:45 541.27527:119 598.32654:28	2340.43	2382.98	2393.62	3065.96	2212.77	796.429	798.214	850	498.214	680.357	348	424	341	293	300	2478.75	724.643
560	1.659	644.452	644.4519_1.659	w/o MS2:HexCer 16:2;2O/16:4	[M+H]+	ion correlated with 40	0.2	True	7.46	644.452	C38H63NO8	HexCer_NS	DLGCNZYXMPHYEP-UHFFFAOYSA-N	O=C(NC(COC1OC(CO)C(O)C(O)C1O)C(O)C=CCCC=CCCCCCCC)CCC=CCC=CCC=CCC=CCC	530	True	True	False		False	False	null	null	100	99.8	null	null	null	51.84	Lipidomics_pos_BL_02	644.4519:4587 645.45525:3987 646.45861:997	230.21529:102 230.2473:2475 644.4447:38 644.45978:54	442.553	359.574	3691.49	248.936	378.723	2112.5	8191.07	223.214	132.143	207.143	330	136	317	215	706	1024.15	2173.53
561	3.311	644.494	644.49384_3.311	w/o MS2:SL 12:1;O/24:1;O	[M+H]+		0.8	True	8.61	644.492	C36H69NO6S	SL	DELXWFHNFBZLTC-UHFFFAOYSA-N	O=C(N(CC(O)C=CCCCCCCC)CS(=O)(=O)O)C(O)CCCCCCCCCCC=CCCCCCCCCCC	530	True	True	False		False	False	null	null	98.8	99.9	null	null	null	21.27	Lipidomics_pos_CON_02	644.49384:2058 645.49719:770 646.50055:300	87.04359:53 117.08854:74 221.13692:137 495.39246:27 627.46692:416	2382.98	3172.34	3338.3	2608.51	2231.91	1814.29	3339.29	2639.29	1255.36	1437.5	1384	2058	1641	1218	1030	2746.94	2097.21
562	15.665	644.594	644.59387_15.665	w/o MS2:Cer 12:1;2O/28:0	[M+Na]+	adduct linked to 453_[M+H-H2O]+	1	True	12.92	644.595	C40H79NO3	Cer_NS	WNZDLKPGXAXIOD-UHFFFAOYSA-N	O=C(NC(CO)C(O)C=CCCCCCCC)CCCCCCCCCCCCCCCCCCCCCCCCCCC	530	True	True	False		False	False	null	null	76.6	100	null	null	null	74.32	Lipidomics_pos_CON_01	644.59387:4311 645.59722:2288 646.60058:662	644.40765:27 644.54077:47 644.5943:982	7644.68	8310.64	6872.34	8208.51	8338.3	6425	6442.86	6857.14	6892.86	7266.07	4311	3737	3658	4178	3678	7874.34	6777.19
563	15.425	645.542	645.54193_15.425	DG 36:1	[M+Na]+	ion correlated with 501	0.8	True	12.8	645.543	C39H74O5	DG	ZRGZCKLWMLZVMS-UHFFFAOYSA-N	O=C(OCC(OC(=O)CCCCCCCCCCCCCCCC=CCCCCCCCCCC)CO)CCCCCCC	420	True	True	True		False	False	null	null	100	100	75	75	100	43.11	Lipidomics_pos_BL_02	645.54218:2094 646.54553:1158 647.54889:283	645.54419:5281	1821.28	2048.94	1702.13	2582.98	2265.96	3112.5	3739.29	3632.14	3387.5	3789.29	4855	4217	3882	4665	3886	2084.28	3532.19
564	14.622	645.544	645.54437_14.622	DG 36:1	[M+Na]+	adduct linked to 611_[M+NH4]+; found in higher mz's MsMs_611	0.2	True	12.8	645.543	C39H74O5	DG	ZRGZCKLWMLZVMS-UHFFFAOYSA-N	O=C(OCC(OC(=O)CCCCCCCCCCCCCCCC=CCCCCCCCCCC)CO)CCCCCCC	420	True	True	True		False	False	null	null	100	100	59	75	100	17.38	Lipidomics_pos_CON_01	645.54419:1223 646.54754:724 647.5509:230	95.08589:74 173.13934:45 269.22635:259 287.23666:515 610.34845:78 645.54431:1597	1642.55	1451.06	1153.19	1897.87	1529.79	866.071	1062.5	1257.14	1051.79	1230.36	1223	1080	867	1479	1081	1534.76	1093.42
565	1.922	646.335	646.33502_1.922	Unknown	[M+H]+		0.267	True	null	null	null	null	null	null	999	False	False	False		False	False	null	null	null	null	null	null	null	58.56	Lipidomics_pos_AH_01	646.33337:1276 647.33672:307 648.34008:109	166.05937:34 327.10626:44 340.10367:84 422.1785:107 503.26349:300 646.3252:198	2714.89	2336.17	2412.77	2872.34	2472.34	505.357	505.357	442.857	416.071	441.071	248	224	239	272	254	2561.97	461.987
566	14.492	646.611	646.61145_14.492	w/o MS2:Cer 18:1;2O/24:1;O	[M+H]+		0.133	True	12.73	646.613	C42H81NO4	Cer_HS	WLAOOCOLPLQZNK-UHFFFAOYSA-N	O=C(NC(CO)C(O)C=CCCCCCCCCCCCCC)C(O)CCCCCCCCCCC=CCCCCCCCCCC	530	True	True	False		False	False	null	null	78.8	100	null	null	null	28.04	Lipidomics_pos_AH_02	646.61145:1263 647.6148:734 648.61816:198	111.11712:22 184.07687:13 264.26852:715 382.36908:19 537.49579:34 616.59503:53 628.60193:219 646.60864:1002	2512.77	2687.23	2061.7	2519.15	2214.89	726.786	798.214	682.143	850	766.071	943	952	787	946	777	2398.94	764.71
567	14.943	646.612	646.612_14.943	Cer 42:2;3O|Cer 18:2;2O/24:0;O	[M+H-H2O]+	adduct linked to 627_[M+H]+	1	True	12.66	646.613	C42H81NO4	Cer_HS	LFXYMUVNQLVMDF-UHFFFAOYSA-N	O=C(NC(CO)C(O)C=CCCC=CCCCCCCCCC)C(O)CCCCCCCCCCCCCCCCCCCCCC	410	True	True	True		False	False	null	null	100	100	59.2	76.2	100	75.1	Lipidomics_pos_BL_03	646.61206:2445 647.61541:1139 648.61877:370	81.06975:55 209.18401:13 250.25266:172 262.25232:1837 269.24515:37 578.48254:17 598.59711:106 610.59192:360 646.60541:346	7655.32	9155.32	7900	8808.51	8187.23	4057.14	4958.93	4366.07	5162.5	5253.57	3210	3012	2915	3230	2940	8341.06	4759.62
568	15.771	647.458	647.45813_15.771	DG 37:7	[M+Na]+		1	True	9.6	647.465	C40H64O5	DG	HWGDKLDOTMWARD-UHFFFAOYSA-N	O=C(OCC(OC(=O)CCCCCC=CCC=CCC=CCC=CCC=CCC=CCC=CCC)CO)CCCCCCCC	420	True	True	True		False	False	null	null	100	99.8	73.2	75	100	312.62	Lipidomics_pos_BL_04	647.45813:48606 648.46148:32257 649.46484:7021	189.16231:36 345.15958:18 441.29004:436 647.4577:12347	30602.1	24274.5	25455.3	27808.5	28770.2	19125	18921.4	47219.6	86796.4	48260.7	20509	10673	25411	31527	23664	27382.6	44065
569	14.357	647.463	647.4635_14.357	DG 37:7	[M+Na]+		0.533	True	9.6	647.465	C40H64O5	DG	HWGDKLDOTMWARD-UHFFFAOYSA-N	O=C(OCC(OC(=O)CCCCCC=CCC=CCC=CCC=CCC=CCC=CCC=CCC)CO)CCCCCCCC	420	True	True	True		False	False	null	null	100	99.9	75	75	100	30.84	Lipidomics_pos_BL_01	647.4646:1200 648.46795:611 649.47131:484	647.46344:1636	2295.74	7655.32	2504.26	9023.4	4661.7	2142.86	2832.14	2964.29	2158.93	2735.71	947	1166	977	956	1104	5227.9	2567.03
570	2.337	648.351	648.35132_2.337	Unknown	[M+H]+		0.333	True	null	null	null	null	null	null	999	False	False	False		False	False	null	null	null	null	null	null	null	17.99	Lipidomics_pos_AH_01	648.34924:1251 649.35259:563 650.35595:101	338.16489:56 340.11597:344 412.17444:128 463.22958:452 503.26151:75	2661.7	2551.06	2780.85	3140.43	2691.49	428.571	494.643	432.143	371.429	410.714	170	180	203	174	168	2765.13	427.567
571	15.256	648.627	648.62695_15.256	Cer 42:1;3O|Cer 18:1;2O/24:0;O	[M+H-H2O]+	found in higher mz's MsMs_1513	0.2	True	12.97	648.629	C42H83NO4	Cer_HS	WAYLDHLWVYQNSQ-UHFFFAOYSA-N	O=C(NC(CO)C(O)C=CCCCCCCCCCCCCC)C(O)CCCCCCCCCCCCCCCCCCCCCC	410	True	True	True		False	False	null	null	100	100	69.2	70.3	100	41.1	Lipidomics_pos_AH_01	648.62793:1485 649.63128:876 650.63464:198	123.11539:17 252.26785:51 264.24796:59 266.28519:146 382.36887:18 613.53339:44 618.61414:97 648.62775:1855	3159.57	3182.98	2914.89	3557.45	3565.96	1817.86	2337.5	2228.57	2101.79	2039.29	1229	1174	971	1064	996	3276.44	2105.11
572	15.6	648.628	648.6275_15.6	Cer 42:2;2O|Cer 18:1;2O/24:1	[M+H]+	adduct linked to 527_[M+H-H2O]+; similar chromatogram in higher mz_676; similar chromatogram in higher mz_1154	1	True	13.03	648.629	C42H81NO3	Cer_NS	HZPUWSUHFOTSAY-UHFFFAOYSA-N	O=C(NC(CO)C(O)C=CCCCCCCCCCCCCC)CCCCCCCCCCCC=CCCCCCCCCCC	410	True	True	True		False	False	null	null	100	100	96	75.3	100	248.07	Lipidomics_pos_BL_05	648.6275:13590 649.63085:8083 650.63421:1836	236.23752:12 252.26768:157 264.26794:1783 282.27844:269 612.60614:223 648.57758:27	23989.4	30002.1	24802.1	31461.7	29795.7	18494.6	21983.9	20553.6	21939.3	24267.9	21155	18591	18302	18262	19235	28009.9	21447.9
573	15.125	649.479	649.479_15.125	DG 37:6	[M+Na]+	ion correlated with 521	1	True	9.97	649.48	C40H66O5	DG	JOTDEPLGNCADRP-UHFFFAOYSA-N	O=C(OCC(OC(=O)CCCCCCCCC=CCC=CCC=CCC=CCC=CCC=CCC)CO)CCCCCCCC	420	True	True	True		False	False	null	null	100	99.9	75	75	100	137.27	Lipidomics_pos_BL_03	649.47968:8061 650.48303:3722 651.48639:1630	649.47925:455	13012.8	33342.6	13291.5	38540.4	20763.8	12417.9	14055.4	14394.6	10564.3	13562.5	6954	8923	7857	6138	8244	23790.1	12999
574	11.718	649.519	649.51898_11.718	w/o MS2:SL 12:1;O/23:0;O	[M+H]+	found in higher mz's MsMs_1233	0.733	True	8.55	649.518	C35H69NO6S	SL	AFBKMISXECBQDL-UHFFFAOYSA-N	O=C(N(CC(O)C=CCCCCCCC)CS(=O)(=O)O)C(O)CCCCCCCCCCCCCCCCCCCCC	530	True	True	False		False	False	null	null	99.9	99.9	null	null	null	33.45	Lipidomics_pos_CON_03	649.51898:3935 650.52233:1370 651.52569:960	131.08423:77 149.13155:89 225.15984:33 649.45465:132	2314.89	2255.32	2089.36	1757.45	1855.32	3432.14	2771.43	2567.86	3105.36	2432.14	2466	3230	3935	2552	2306	2054.23	2861.7
575	10.952	650.436	650.4364_10.952	w/o MS2:SL 13:1;O/24:5;O	[M+H]+		0.067	True	7.79	650.445	C37H63NO6S	SL	VZOCKVKGJHDNOB-UHFFFAOYSA-N	O=C(N(CC(O)C=CCCCCCCCC)CS(=O)(=O)O)C(O)CCCCCCC=CCC=CCC=CCC=CCC=CCC	530	True	True	False		False	False	null	null	80.8	100	null	null	null	25.12	Lipidomics_pos_CON_01	650.4364:1596 651.43975:1008 652.44311:387	650.40381:92	2053.19	2768.09	2346.81	2674.47	2174.47	1225	1085.71	1260.71	883.929	1048.21	1596	1240	1314	1191	1191	2403.54	1100.18
576	10.675	650.437	650.43695_10.675	w/o MS2:SL 13:1;O/24:5;O	[M+H]+		0.267	True	7.79	650.445	C37H63NO6S	SL	VZOCKVKGJHDNOB-UHFFFAOYSA-N	O=C(N(CC(O)C=CCCCCCCCC)CS(=O)(=O)O)C(O)CCCCCCC=CCC=CCC=CCC=CCC=CCC	530	True	True	False		False	False	null	null	83	100	null	null	null	22.86	Lipidomics_pos_CON_01	650.43695:1963 651.4403:816 652.44366:156	109.10557:49 184.0732:2362	2742.55	2731.91	2736.17	2917.02	2663.83	1023.21	1226.79	1055.36	1103.57	1064.29	1963	1281	1528	1590	1436	2757.98	1094.8
577	5.246	650.437	650.43719_5.246	w/o MS2:SL 13:1;O/24:5;O	[M+H]+		0.6	True	7.79	650.445	C37H63NO6S	SL	VZOCKVKGJHDNOB-UHFFFAOYSA-N	O=C(N(CC(O)C=CCCCCCCCC)CS(=O)(=O)O)C(O)CCCCCCC=CCC=CCC=CCC=CCC=CCC	530	True	True	False		False	False	null	null	84	100	null	null	null	33.07	Lipidomics_pos_CON_01	650.43719:2601 651.44054:1031 652.4439:325	184.07347:2874 650.34143:26 650.44031:3374	3468.09	4942.55	3814.89	4338.3	4072.34	1328.57	1582.14	1460.71	1617.86	1651.79	2601	1902	2283	2510	2002	4126.99	1528.15
578	3.397	650.438	650.43799_3.397	w/o MS2:SL 13:1;O/24:5;O	[M+H]+		0.8	True	7.79	650.445	C37H63NO6S	SL	VZOCKVKGJHDNOB-UHFFFAOYSA-N	O=C(N(CC(O)C=CCCCCCCCC)CS(=O)(=O)O)C(O)CCCCCCC=CCC=CCC=CCC=CCC=CCC	530	True	True	False		False	False	null	null	86.9	99.9	null	null	null	67.14	Lipidomics_pos_AH_05	650.43799:5106 651.44134:1892 652.4447:414	467.37674:21 650.43799:558	8534.04	9627.66	8774.47	9740.43	10863.8	2758.93	2517.86	2564.29	2114.29	2705.36	4724	3745	4932	4507	4286	9507.85	2532.01
579	4.44	650.439	650.43896_4.44	w/o MS2:SL 13:1;O/24:5;O	[M+H]+	adduct linked to 634_[M+Na]+	1	True	7.79	650.445	C37H63NO6S	SL	VZOCKVKGJHDNOB-UHFFFAOYSA-N	O=C(N(CC(O)C=CCCCCCCCC)CS(=O)(=O)O)C(O)CCCCCCC=CCC=CCC=CCC=CCC=CCC	530	True	True	False		False	False	null	null	90.2	99.9	null	null	null	367.44	Lipidomics_pos_CON_01	650.43896:28716 651.44231:11501 652.44567:2104	125.09426:7 184.07388:2152 650.37335:18	42923.4	52238.3	47774.5	54166	48751.1	20167.9	20208.9	22600	21626.8	24667.9	28716	27392	22671	25433	23757	49171.2	21853.9
580	15.888	650.643	650.64252_15.888	Cer 42:0;3O|Cer 18:0;2O/24:0;O	[M+H-H2O]+	similar chromatogram in higher mz_842	0.4	True	13.22	650.645	C42H85NO4	Cer_HDS	DGORBCXEWSENPF-UHFFFAOYSA-N	O=C(NC(CO)C(O)CCCCCCCCCCCCCCC)C(O)CCCCCCCCCCCCCCCCCCCCCC	410	True	True	True		False	False	null	null	100	100	42.2	76.6	100	42.33	Lipidomics_pos_BL_05	650.64343:2532 651.64678:1636 652.65014:522	254.28281:13 266.29926:24 632.63116:255 650.64313:241	2923.4	3136.17	2497.87	3278.72	3189.36	4042.86	4130.36	4494.64	4551.79	4521.43	1317	1204	1169	1242	1223	3005.24	4347.92
581	16.289	650.644	650.6438_16.289	Cer 42:1;2O|Cer 18:1;2O/24:0	[M+H]+	ion correlated with 533; adduct linked to 533_[M+H-H2O]+; adduct linked to 636_[M+Na]+	1	True	13.26	650.645	C42H83NO3	Cer_NS	ZJVVOYPTFQEGPH-UHFFFAOYSA-N	O=C(NC(CO)C(O)C=CCCCCCCCCCCCCC)CCCCCCCCCCCCCCCCCCCCCCC	410	True	True	True		False	False	null	null	100	100	64.4	54.9	100	258.11	Lipidomics_pos_AH_03	650.64288:6527 651.64623:3549 652.64959:937	149.13033:8 226.95177:35 252.26756:275 264.26749:2716 278.28195:19 368.37128:10 446.8898:25 614.62128:364 632.63202:4521 650.2876:18 650.64069:210	16489.4	18753.2	13887.2	18108.5	19095.7	13628.6	15844.6	14875	15103.6	17857.1	20221	15909	14366	15600	17870	17266.6	15462.2
582	11.294	651.532	651.53235_11.294	w/o MS2:SL 12:0;O/23:0;O	[M+H]+	ion correlated with 1064; found in higher mz's MsMs_1956	1	True	8.95	651.534	C35H71NO6S	SL	XASLJVBQKPBMIX-UHFFFAOYSA-N	O=C(N(CC(O)CCCCCCCCC)CS(=O)(=O)O)C(O)CCCCCCCCCCCCCCCCCCCCC	530	True	True	False		False	False	null	null	99.2	100	null	null	null	41.05	Lipidomics_pos_CON_03	651.53235:6774 652.5357:3661 653.53906:1116	131.0849:49 651.50311:156	3187.23	3948.94	2955.32	3374.47	3361.7	3096.43	2900	2778.57	3462.5	3487.5	5205	5874	6774	5896	5372	3365.61	3144.8
583	12.682	651.535	651.53479_12.682	w/o MS2:SL 12:0;O/23:0;O	[M+H]+	found in higher mz's MsMs_1252; similar chromatogram in higher mz_1252; similar chromatogram in higher mz_2161	1	True	8.95	651.534	C35H71NO6S	SL	XASLJVBQKPBMIX-UHFFFAOYSA-N	O=C(N(CC(O)CCCCCCCCC)CS(=O)(=O)O)C(O)CCCCCCCCCCCCCCCCCCCCC	530	True	True	False		False	False	null	null	99.8	99.9	null	null	null	51.07	Lipidomics_pos_CON_05	651.53479:8660 652.53814:4364 653.5415:3185	85.1021:19 137.13103:10 201.16559:18 651.53308:903	4197.87	3555.32	4319.15	3565.96	4738.3	4714.29	3214.29	2866.07	3705.36	4666.07	6636	7131	6279	7711	8660	4075.35	3833.21
584	14.507	652.55	652.54993_14.507	w/o MS2:TG 8:0_8:0_20:2	[M+H]+	similar chromatogram in higher mz_637	0.133	True	10.37	652.551	C39H70O6	TG	YIEIHKNDOUFUAH-UHFFFAOYSA-N	O=C(OCC(OC(=O)CCCCCCC)COC(=O)CCCCCCCCCC=CCC=CCCCCC)CCCCCCC	530	True	True	False		False	False	null	null	99.6	99.9	null	null	null	20.52	Lipidomics_pos_AH_02	652.54993:1387 653.55328:900 654.55664:361	89.05839:30 95.0835:75 211.20871:38 353.2489:61 407.31342:439 465.3912:110 547.44202:115 616.59076:27 652.54388:897	978.723	2951.06	923.404	2876.6	1455.32	916.071	962.5	864.286	835.714	973.214	492	812	589	459	647	1836.78	910.379
585	16.555	652.659	652.65948_16.555	w/o MS2:Cer 18:0;2O/24:0	[M+H]+		0.4	True	13.42	652.66	C42H85NO3	Cer_NDS	BPLYVSYSBPLDOA-UHFFFAOYSA-N	O=C(NC(CO)C(O)CCCCCCCCCCCCCCC)CCCCCCCCCCCCCCCCCCCCCCC	530	True	True	False		False	False	null	null	63.3	100	null	null	null	48.15	Lipidomics_pos_BL_04	652.65948:2045 653.66283:1065 654.66619:298	244.92619:22 284.27802:32 368.38803:124 616.61853:27 616.6366:55 652.65942:2565	2346.81	2512.77	2125.53	2834.04	2948.94	3135.71	3364.29	3469.64	3651.79	3573.21	717	634	586	534	620	2553.56	3438.5
586	21.539	653.269	653.2691_21.539	Unknown	[M+H]+		0.133	True	null	null	null	null	null	null	999	False	False	False		False	False	null	null	null	null	null	null	null	10.78	Lipidomics_pos_BL_05	653.2691:1393 654.27245:1608 655.27581:373	188.07166:17 349.15363:10 395.22467:7 593.2536:11 625.27411:319 653.27118:655	2097.87	2619.15	527.66	234.043	206.383	400	396.429	303.571	276.786	2487.5	627	392	329	312	395	1137.07	772.924
587	11.982	653.548	653.54767_11.982	w/o MS2:RIKEN P-VS1 ID-6886 from Cell_C2C12_WT_N_4h10AA	[M+H]+	ion correlated with 1823	0.2	True	12.92	653.545		Unknown			530	True	True	False		False	False	null	null	97.4	100	null	null	null	52.98	Lipidomics_pos_CON_03	653.54767:3710 654.55102:3112 655.55438:1257	653.47308:213	2431.91	2717.02	2555.32	2512.77	2378.72	2889.29	2637.5	2775	2546.43	2878.57	3311	3594	3710	3008	3533	2519.15	2745.11
588	12.971	653.548	653.54797_12.971	w/o MS2:RIKEN P-VS1 ID-6886 from Cell_C2C12_WT_N_4h10AA	[M+H]+	found in higher mz's MsMs_1274	0.667	True	12.92	653.545		Unknown			530	True	True	False		False	False	null	null	96.9	100	null	null	null	47.24	Lipidomics_pos_CON_03	653.54797:4119 654.55132:1714 655.55468:826	71.08276:292 109.10158:136 183.119:51	3080.85	3636.17	2991.49	3680.85	4355.32	2196.43	2142.86	2107.14	2321.43	2453.57	3836	3989	4119	3693	3434	3548.88	2244.37
589	11.599	653.55	653.54968_11.599	w/o MS2:RIKEN P-VS1 ID-6886 from Cell_C2C12_WT_N_4h10AA	[M+H]+	similar chromatogram in higher mz_1814	0.733	True	12.92	653.545		Unknown			530	True	True	False		False	False	null	null	92.9	100	null	null	null	44.76	Lipidomics_pos_CON_03	653.54968:4213 654.55303:2154 655.55639:804	91.0526:60 653.51611:81	4444.68	4921.28	4589.36	5310.64	5159.57	2912.5	2987.5	3507.14	3485.71	3275	3402	3546	4213	3823	3237	4884.73	3233.35
590	11.972	654.553	654.55292_11.972	w/o MS2:Cer 12:1;3O/30:5;(2OH)	[M+H]+		0.067	True	10.07	654.546	C42H73NO5	Cer_AP	SGMNLZLGLLINNJ-UHFFFAOYSA-N	O=C(NC(CO)C(O)C(O)CCCC=CCCC)C(O)CCCCCCCCCCCCC=CCC=CCC=CCC=CCC=CCC	530	True	True	False		False	False	null	null	85.5	100	null	null	null	49.16	Lipidomics_pos_CON_04	654.55292:1938 655.55627:748 656.55963:0	109.09715:50 608.26068:136	859.574	1146.81	1040.43	1193.62	1406.38	1066.07	1078.57	1414.29	1157.14	1419.64	1544	1653	1960	1938	1613	1129.84	1227.57
591	15.153	654.565	654.56482_15.153	TG 36:1|TG 8:0_10:0_18:1	[M+NH4]+	ion correlated with 643; similar chromatogram in higher mz_643; adduct linked to 603_[M+Na]+; similar chromatogram in higher mz_1076	1	True	11.45	654.567	C39H72O6	TG	WRHBANXXQKCUJB-UHFFFAOYSA-N	O=C(OCC(OC(=O)CCCCCCCCC)COC(=O)CCCCCCCC=CCCCCCCCC)CCCCCCC	410	True	True	True		False	False	null	null	100	99.9	56.3	62.7	100	101	Lipidomics_pos_BL_02	654.56549:3845 655.56884:1930 656.5722:1116	155.13782:17 265.2543:69 355.28424:702 437.36349:163 465.39142:120 493.42441:196 637.54852:35 654.56421:606	5555.32	20019.1	5919.15	22810.6	11763.8	5425	6866.07	6644.64	4855.36	6639.29	3815	4838	3574	2987	4250	13213.6	6086
592	13.597	655.565	655.56506_13.597	Unknown	[M+H]+	found in higher mz's MsMs_1289	1	True	null	null	null	null	null	null	999	False	False	False		False	False	null	null	null	null	null	null	null	64.28	Lipidomics_pos_AH_01	655.56427:2696 656.56762:1302 657.57098:695	655.53723:174	5736.17	4651.06	5229.79	6229.79	5963.83	3025	4353.57	3516.07	4094.64	3567.86	4487	4440	4460	5102	3899	5562.29	3711.63
593	12.294	655.565	655.56549_12.294	Unknown	[M+H]+	ion correlated with 1695	1	True	null	null	null	null	null	null	999	False	False	False		False	False	null	null	null	null	null	null	null	98.6	Lipidomics_pos_AH_01	655.56482:3577 656.56817:2313 657.57153:382	69.06919:72 81.07085:50 95.08587:177 97.09883:50 105.06921:110 109.09805:79 184.0706:51 655.56812:3206	7610.64	6851.06	7246.81	6965.96	7844.68	5376.79	5580.36	5617.86	6008.93	5912.5	5623	6479	6401	5917	5868	7303.46	5699.49
594	5.865	656.531	656.53052_5.865	w/o MS2:SL 12:1;O/26:1	[M+H]+	similar chromatogram in higher mz_650	1	True	10.5	656.528	C38H73NO5S	SL	IQHDBTWBUVJGEZ-UHFFFAOYSA-N	O=C(N(CC(O)C=CCCCCCCC)CS(=O)(=O)O)CCCCCCCCCCCCCC=CCCCCCCCCCC	530	True	True	False		False	False	null	null	98.5	99.9	null	null	null	220.64	Lipidomics_pos_CON_02	656.53052:34002 657.53387:14651 658.53723:3011	71.08567:89 87.04386:15 127.15022:9 169.19595:38 177.11224:90 213.22137:47 251.18755:5 257.24713:116 283.17615:6 453.30157:7 539.4165:8 639.50391:93 656.53046:3298	42427.7	39957.4	33323.4	30812.8	23478.7	28882.1	44535.7	23951.8	22689.3	19339.3	20380	34002	15017	13491	14769	33999.9	27880
595	15.833	656.581	656.58105_15.833	TG 36:0|TG 12:0_12:0_12:0	[M+NH4]+	similar chromatogram in higher mz_1092; adduct linked to 607_[M+Na]+	1	True	12.85	656.582	C39H74O6	TG	VMPHSYLJUKZBJJ-UHFFFAOYSA-N	O=C(OCC(OC(=O)CCCCCCCCCCC)COC(=O)CCCCCCCCCCC)CCCCCCCCCCC	410	True	True	True		False	False	null	null	100	100	60.6	64.6	100	201.78	Lipidomics_pos_CON_01	656.58154:13527 657.58489:6413 658.58825:1587	133.0825:29 183.17418:87 369.29315:58 369.30408:79 411.34686:240 439.37759:1236 656.58246:1100	21006.4	63014.9	24127.7	67240.4	38327.7	19894.6	23339.3	25685.7	18900	22737.5	13527	15385	12573	10310	14165	42743.1	22111.3
596	14.04	657.483	657.4834_14.04	w/o MS2:RIKEN P-VS1 ID-6963 from Mouse_Lung_WT_N_F1AA	[M+H]+		1	True	13.54	657.483		Unknown			530	True	True	False		False	False	null	null	99.9	100	null	null	null	38.29	Lipidomics_pos_AH_04	657.4834:2376 658.48675:1513 659.49011:751	589.48566:75	3421.28	4195.74	3157.45	5055.32	4163.83	4026.79	4089.29	4192.86	3828.57	3896.43	1599	1605	1536	1509	1493	3998.24	4006.83
597	12.996	657.58	657.57977_12.996	RIKEN P-VS1 ID-6973 from Mouse_Ear_fads2KO_N_Ctr	[M+H]+	ion correlated with 2195; similar chromatogram in higher mz_1388; similar chromatogram in higher mz_1462	0.333	True	13.55	657.581		Unknown			430	True	True	True		False	False	null	null	85	100	85.4	81	50	24.5	Lipidomics_pos_CON_02	657.58289:1519 658.58624:1055 659.5896:393	85.10029:50 657.54291:213	1036.17	1042.55	1112.77	1257.45	1019.15	1112.5	1271.43	991.071	1916.07	1158.93	1818	1519	1575	1701	1623	1093.59	1289.96
598	14.979	658.552	658.55206_14.979	w/o MS2:Cer 15:3;2O/30:6	[M+H]+		0.933	True	11.11	658.556	C45H73NO3	Cer_NS	OJLMSMKUFDARIE-UHFFFAOYSA-N	O=C(NC(CO)C(O)C=CCCC=CCCC=CCC)CCCCCCCCCCC=CCC=CCC=CCC=CCC=CCC=CCC	530	True	True	False		False	False	null	null	96.1	99.9	null	null	null	17.91	Lipidomics_pos_AH_05	658.55206:1699 659.55541:967 660.55877:463	309.28024:36 641.50195:23	3410.64	3431.91	2991.49	3338.3	3614.89	2050	2194.64	2192.86	2196.43	2428.57	1601	1513	1377	1548	1327	3357.15	2212.46
599	15.827	658.587	658.58722_15.827	Unknown	[M+H]+		0.067	False	null	null	null	null	null	null	999	False	False	False		False	False	null	null	null	null	null	null	null	27.59	Lipidomics_pos_AH_02	658.58722:2666 659.59057:637 660.59393:0		2087.23	5672.34	2493.62	6376.6	3525.53	1889.29	2344.64	2201.79	1948.21	2373.21	1300	1550	1243	1030	1446	4031.09	2151.58
600	16.007	658.61	658.60968_16.007	w/o MS2:Cer 12:0;2O/29:1	[M+Na]+	adduct linked to 499_[M+H-H2O]+	0.067	False	13.07	658.611	C41H81NO3	Cer_NDS	RAQBTACWADCHLH-UHFFFAOYSA-N	O=C(NC(CO)C(O)CCCCCCCCC)CCCCCCCCCCCCCCC=CCCCCCCCCCCCC	530	True	True	False		False	False	null	null	99.3	100	null	null	null	33.44	Lipidomics_pos_AH_05	658.60968:1454 659.61303:1038 660.61639:174		2689.36	2840.43	2697.87	2638.3	3093.62	1717.86	1950	1685.71	1992.86	1850	1551	1174	1235	1198	1398	2791.68	1839.13
601	16.233	658.649	658.64905_16.233	w/o MS2:Cer 19:2;2O/25:0	[M+H-H2O]+	ion correlated with 714; ion correlated with 774; adduct linked to 649_[M+H-H2O]+; found in higher mz's MsMs_649; adduct linked to 714_[M+Na]+	0.133	True	13.34	658.65	C44H85NO3	Cer_NS	IIUMMZRNANIVNB-UHFFFAOYSA-N	O=C(NC(CO)C(O)C=CCCC=CCCCCCCCCCC)CCCCCCCCCCCCCCCCCCCCCCCC	530	True	True	False		False	False	null	null	63.5	100	null	null	null	15.82	Lipidomics_pos_CON_01	658.64905:1368 659.6524:786 660.65576:241	107.08516:10 250.86668:10 264.25522:49 292.2749:59 385.32138:47 413.35284:19 468.41049:15 623.57581:30 640.60468:31 658.64844:1617	776.596	821.277	657.447	836.17	846.809	746.429	830.357	812.5	766.071	869.643	1368	1108	1091	1138	1236	787.846	805.223
602	14.73	659.5	659.50049_14.73	w/o MS2:SL 12:1;O/24:2;O	[M+H]+	ion correlated with 375; ion correlated with 548	1	True	8.4	659.503	C36H67NO6S	SL	ZVRZLHIRGTVUAL-UHFFFAOYSA-N	O=C(N(CC(O)C=CCCCCCCC)CS(=O)(=O)O)C(O)CCCCCCCCCCC=CCC=CCCCCCCC	530	True	True	False		False	False	null	null	98.6	99.8	null	null	null	83.33	Lipidomics_pos_CON_01	659.50049:7228 660.50384:3127 661.5072:1624	336.20789:44 659.26849:50 659.4989:2923	5908.51	6240.43	5504.26	8163.83	6287.23	7128.57	8171.43	7817.86	6964.29	8083.93	7228	6839	6072	6632	5846	6420.8	7633.37
603	15.151	659.52	659.52002_15.151	w/o MS2:TG 8:0_8:0_20:1	[M+Na]+	adduct linked to 591_[M+NH4]+	0.133	True	11.55	659.522	C39H72O6	TG	LDUGIKWWRIWVNU-UHFFFAOYSA-N	O=C(OCC(OC(=O)CCCCCCC)COC(=O)CCCCCCCCCC=CCCCCCCCC)CCCCCCC	530	True	True	False		False	False	null	null	98.8	99.9	null	null	null	35.95	Lipidomics_pos_AH_04	659.52002:2764 660.52337:1325 661.52673:303	659.52039:2424	1787.23	4942.55	1868.09	5880.85	3036.17	1621.43	1928.57	1980.36	1664.29	1850	1162	1484	1148	1100	1269	3503.3	1809.24
604	14.738	660.504	660.50385_14.738	w/o MS2:HexCer 16:0;3O/14:0;(2OH)	[M+H]+		0.067	False	8.1	660.505	C36H71NO10	HexCer_AP	QUIBQVLLXCUVJE-UHFFFAOYSA-N	O=C(NC(COC1OC(CO)C(O)C(O)C1O)C(O)C(O)CCCCCCCCCCCC)C(O)CCCCCCCCCCCC	530	True	True	False		False	False	null	null	99.8	99.8	null	null	null	43.4	Lipidomics_pos_BL_02	660.50385:1908 661.5072:750 662.51056:211		2265.96	3108.51	2153.19	3574.47	2731.91	3069.64	3407.14	3116.07	3017.86	3580.36	2799	2990	2660	2710	2571	2766.97	3238.12
605	15.665	660.568	660.56842_15.665	w/o MS2:SE 28:2/17:4	[M+H]+		1	True	13.64	660.571	C45H70O2	BRSE	XUYZSOMGKYZQCL-UHFFFAOYSA-N	O=C(OC1CC2=CCC3C(CCC4(C)C(CCC34)C(C=CC(C)C(C)C)C)C2(C)CC1)CCCC=CCC=CCC=CCC=CCC	530	True	True	False		False	False	null	null	65.4	100	null	null	null	68.26	Lipidomics_pos_BL_04	660.56842:5097 661.57177:2843 662.57513:817	660.56927:480	9251.06	10131.9	8291.49	9261.7	10461.7	8335.71	8487.5	8728.57	9101.79	8967.86	5004	4421	4339	4907	4604	9479.31	8724.22
606	15.425	661.516	661.51636_15.425	w/o MS2:SL 12:1;O/24:1;O	[M+H]+	ion correlated with 552	1	True	8.61	661.518	C36H69NO6S	SL	DELXWFHNFBZLTC-UHFFFAOYSA-N	O=C(N(CC(O)C=CCCCCCCC)CS(=O)(=O)O)C(O)CCCCCCCCCCC=CCCCCCCCCCC	530	True	True	False		False	False	null	null	98.8	99.8	null	null	null	82.92	Lipidomics_pos_CON_01	661.51636:10095 662.51971:4682 663.52307:1776	405.29565:33 523.4729:18	4193.62	4553.19	3902.13	5521.28	4659.57	7125	8257.14	7764.29	7637.5	8528.57	10095	8451	7858	9900	8378	4566.25	7862.66
607	15.827	661.536	661.53625_15.827	w/o MS2:TG 12:0_12:0_12:0	[M+Na]+	adduct linked to 595_[M+NH4]+	0.4	True	12.85	661.538	C39H74O6	TG	VMPHSYLJUKZBJJ-UHFFFAOYSA-N	O=C(OCC(OC(=O)CCCCCCCCCCC)COC(=O)CCCCCCCCCCC)CCCCCCCCCCC	530	True	True	False		False	False	null	null	76.6	100	null	null	null	57.8	Lipidomics_pos_AH_04	661.53625:6495 662.5396:3468 663.54296:676	643.61749:56 661.51489:2970	5708.51	13012.8	5619.15	13819.1	9021.28	4867.86	6058.93	5778.57	4194.64	5664.29	3141	3607	2993	2574	3259	9436.09	5313.01
608	4.063	662.439	662.43939_4.063	RIKEN P-VS1 ID-7056 from Mouse_Feces_WT_N_Ctr	[M+H]+		0.133	True	7.96	662.435		Unknown			430	True	True	True		False	False	null	null	82.5	99.9	88	68.2	50	29.87	Lipidomics_pos_CON_01	662.43823:1332 663.44158:686 664.44494:273	132.90395:6 603.30603:7 662.43896:1544	1585.11	1889.36	1714.89	1876.6	1908.51	896.429	869.643	1050	821.429	991.071	1332	1387	1188	1248	1118	1794.63	925.29
609	9.995	662.511	662.51099_9.995	LPC 28:1	[M+H]+	ion correlated with 746	0.333	True	8.54	662.512	C36H72NO7P	LPC	UKVNGEBYOOQIDB-UHFFFAOYSA-N	O=C(OCC(O)COP(=O)([O-])OCC[N+](C)(C)C)CCCCCCCCCCCCCCCC=CCCCCCCCCCC	410	True	True	True		False	False	null	null	100	100	89.8	74.7	100	22.94	Lipidomics_pos_CON_04	662.51068:1452 663.51403:618 664.51739:131	125.00041:13 165.15988:88 184.07304:1870 662.51013:1683	1021.28	1359.57	987.234	1134.04	1034.04	580.357	635.714	630.357	592.857	671.429	1418	1472	1353	1452	1492	1107.77	622.344
610	10.966	662.512	662.51202_10.966	w/o MS2:PE P-23:0_8:0	[M+H]+		0.333	True	9.68	662.512	C36H72NO7P	EtherPE	RYFQVQPWHVORGJ-UHFFFAOYSA-N	O=C(OC(COC=CCCCCCCCCCCCCCCCCCCCCC)COP(=O)(O)OCCN)CCCCCCC	530	True	True	False		False	False	null	null	78.9	100	null	null	null	17.21	Lipidomics_pos_CON_05	662.51202:1230 663.51537:568 664.51873:299	124.9985:48 521.45667:335 662.5094:1299	1461.7	1389.36	1304.26	1412.77	1336.17	807.143	803.571	816.071	957.143	928.571	1207	1136	1090	1063	1230	1380.82	862.589
611	14.621	662.57	662.57013_14.621	w/o MS2:Cer 13:1;3O/28:3;(2OH)	[M+NH4]+	ion correlated with 667; adduct linked to 564_[M+Na]+; similar chromatogram in higher mz_667	1	True	10.49	662.572	C41H75NO5	Cer_AP	KJSSCEJPGAGQQL-UHFFFAOYSA-N	O=C(NC(CO)C(O)C(O)CCCC=CCCCC)C(O)CCCCCCCCCCCC=CCC=CCC=CCCCCCCC	530	True	True	False		False	False	null	null	99.2	99.9	null	null	null	87.78	Lipidomics_pos_CON_04	662.57013:9573 663.57348:4833 664.57684:1144	91.05265:25 151.14922:25 163.1501:45 203.14424:39 259.2406:50 269.22626:118 287.25208:45 645.54321:223	9270.21	9348.94	7529.79	13259.6	10910.6	5025	5928.57	6014.29	6237.5	8371.43	8630	6591	4656	9573	7728	10063.8	6315.38
612	14.516	663.373	663.37335_14.516	Unknown	[M+H]+		1	True	null	null	null	null	null	null	999	False	False	False		False	False	null	null	null	null	null	null	null	33.71	Lipidomics_pos_AH_01	663.37537:5046 664.37872:3017 665.38208:754	439.20651:23 495.26373:118 663.45331:193	10736.2	7300	10953.2	6278.72	7855.32	9046.43	8491.07	8069.64	8507.14	9026.79	6096	3613	3100	3794	4735	8624.89	8628.15
613	19.089	663.452	663.45209_19.089	w/o MS2:SM 12:2;2O/20:5	[M+H]+		0.133	False	6.61	663.45	C37H63N2O6P	SM	XKTXCUCZGOGZTL-UHFFFAOYSA-N	O=C(NC(COP(=O)([O-])OCC[N+](C)(C)C)C(O)C=CCCC=CCCC)CCCC=CCC=CCC=CCC=CCC=CCC	530	True	True	False		False	False	null	null	97.2	99.2	null	null	null	10.91	Lipidomics_pos_CON_01	663.45209:4170 664.45544:1458 665.4588:617		6502.13	6874.47	6540.43	6497.87	7340.43	5792.86	6112.5	5544.64	6008.93	5594.64	4170	3928	3863	3821	3631	6751.33	5810.42
614	13.408	663.452	663.45215_13.408	RIKEN P-VS1 ID-7082 from Mouse_Macrophage_WT_N_F1AA	[M+H]+	adduct linked to 659_[M+NH4]+; adduct linked to 672_[M+Na]+; found in higher mz's MsMs_873; found in higher mz's MsMs_659; similar chromatogram in higher mz_1107; found in higher mz's MsMs_2179; found in higher mz's MsMs_751	1	True	9.9	663.455		Unknown			430	True	True	True		False	False	null	null	81.7	99.9	91.7	56.3	55.6	1978.9	Lipidomics_pos_AH_04	663.45233:241873 664.45568:158624 665.45904:39021	363.17123:176 439.20178:3327 495.26389:18749 607.32959:142 663.40265:207	580898	489413	436940	514623	523670	374977	384598	660261	783775	717280	281808	196216	223376	247745	237342	509109	584178
615	15.482	663.494	663.49414_15.482	DG 38:6	[M+Na]+		0.133	True	10.17	663.496	C41H68O5	DG	MAVBOFOXLFFASS-UHFFFAOYSA-N	O=C(OCC(OC(=O)CCCCCCCCCCC=CCC=CCC=CCC=CCC=CCC=CCC)CO)CCCCCCC	420	True	True	True		False	False	null	null	100	99.9	63.1	75	100	29.37	Lipidomics_pos_AH_02	663.49359:2020 664.49694:1105 665.5003:419	383.13556:54 439.17548:52 495.22781:86 551.32739:525 663.47742:3013	2089.36	4297.87	2217.02	5351.06	3138.3	2050	2483.93	2558.93	1753.57	2482.14	1052	1425	975	866	1043	3418.67	2265.62
616	11.924	664.491	664.49066_11.924	PE 30:0	[M+H]+		0.667	True	8.94	664.491	C35H70NO8P	PE	SKVKIGSFTGVBOX-UHFFFAOYSA-N	O=C(OCC(OC(=O)CCCCCCCCCCCCCC)COP(=O)(O)OCCN)CCCCCCCCCCCCCC	420	True	True	True		False	False	null	null	94.7	100	66.1	67.1	100	11.76	Lipidomics_pos_CON_04	664.48962:1589 665.49297:1080 666.49633:0	95.08498:47 496.26288:27 523.47113:2546 608.39618:75 664.48608:746	938.298	965.957	946.809	902.128	834.043	3371.43	3042.86	2585.71	2771.43	2585.71	1338	1511	1137	1589	1275	916.941	2871.05
617	11.165	664.525	664.52545_11.165	LPC 28:0	[M+H]+		1	True	8.86	664.528	C36H74NO7P	LPC	VPAMUPUPKCTFGJ-UHFFFAOYSA-N	O=C(OCC(O)COP(=O)([O-])OCC[N+](C)(C)C)CCCCCCCCCCCCCCCCCCCCCCCCCCC	410	True	True	True		False	False	null	null	100	100	92.2	75.8	100	25.88	Lipidomics_pos_BL_02	664.52625:2630 665.5296:1240 666.53296:345	184.07332:3853 664.52588:2793	5010.64	5521.28	4312.77	5140.43	4772.34	4235.71	4696.43	4714.29	4616.07	5400	5086	4826	4784	5131	4943	4951.49	4732.5
618	15.212	664.586	664.58643_15.212	w/o MS2:DG 14:0_24:3	[M+H]+	ion correlated with 673	0.267	True	12.61	664.588	C41H74O5	DG	HDSITRHOIDUCLB-UHFFFAOYSA-N	O=C(OCC(OC(=O)CCCCCCCCC=CCC=CCC=CCCCCCCC)CO)CCCCCCCCCCCCC	530	True	True	False		False	False	null	null	70	100	null	null	null	31.45	Lipidomics_pos_CON_04	664.58643:2481 665.58978:1591 666.59314:531	93.07116:25 121.10144:40 173.13245:70 193.1949:46 264.27069:42 271.22141:60 285.27643:32 327.26166:27 345.28052:32 395.30917:17 440.20029:56 496.2673:144 552.33014:247 608.39496:477 629.54883:517 647.5531:360 664.45728:1031	859.574	772.34	608.511	1070.21	819.149	483.929	689.286	689.286	644.643	973.214	2126	1683	1139	2481	1968	826.596	696.138
619	14.978	664.587	664.58661_14.978	DG 38:3|DG 18:0_20:3	[M+NH4]+	ion correlated with 674; adduct linked to 629_[M+Na]+	0.333	True	12.78	664.588	C41H74O5	DG	HNIUPWXDMUKNJU-UHFFFAOYSA-N	O=C(OCC(OC(=O)CCCCCCCCCC=CCC=CCC=CCC)CO)CCCCCCCCCCCCCCCCC	410	True	True	True		False	False	null	null	100	100	38.3	63.2	100	36.55	Lipidomics_pos_CON_03	664.58636:1796 665.58971:1087 666.59307:380	71.08471:93 105.06923:25 123.1139:25 163.14812:66 177.16048:71 219.20523:26 271.23874:111 289.23145:44 327.26978:32 341.27838:132 363.28873:1078 439.20441:27 496.26706:175 552.33191:300 602.58783:178 629.5484:1136 647.55719:811 664.45776:943	1759.57	1731.91	1187.23	1989.36	1557.45	1571.43	1930.36	1867.86	2019.64	2342.86	3115	2355	1796	3531	2751	1645.43	1946.36
620	18.251	664.602	664.60162_18.251	CE 18:3	[M+NH4]+		0.4	True	14.3	664.603	C45H74O2	CE	FYMCIBHUFSIWCE-UHFFFAOYSA-N	O=C(OC1CC2=CCC3C(CCC4(C)C(CCC34)C(C)CCCC(C)C)C2(C)CC1)CCCCCCCC=CCC=CCC=CCC	410	True	True	True		False	False	null	null	99.7	99.9	59.3	69.4	100	26.5	Lipidomics_pos_CON_01	664.60162:1917 665.60497:1389 666.60833:374	125.13152:23 132.9043:208 219.21088:37 369.35095:6386 440.203:70 552.33228:305 608.39258:452 662.25885:18 664.45587:963	1500	1902.13	823.404	1614.89	1327.66	1255.36	1321.43	1380.36	1503.57	1835.71	1917	1702	1745	1758	1845	1433.72	1459
621	3.866	666.433	666.43298_3.866	w/o MS2:BMP 8:0_19:2	[M+H]+		0.667	True	7.48	666.434	C33H61O10P	BMP	MRQIRNLUTCBFKT-UHFFFAOYSA-N	O=C(OC(CO)COP(=O)(O)OCC(OC(=O)CCCCCCCC=CCC=CCCCCCC)CO)CCCCCCC	530	True	True	False		False	False	null	null	99.7	99.9	null	null	null	37.51	Lipidomics_pos_AH_04	666.43298:2034 667.43633:847 668.43969:219	184.02704:17 666.36133:25	4210.64	4023.4	4125.53	4327.66	3261.7	1528.57	1683.93	2008.93	1792.86	1578.57	1859	1531	1804	1871	1556	3989.44	1718.24
622	10.964	666.434	666.43365_10.964	w/o MS2:BMP 8:0_19:2	[M+H]+		0.067	False	7.48	666.434	C33H61O10P	BMP	MRQIRNLUTCBFKT-UHFFFAOYSA-N	O=C(OC(CO)COP(=O)(O)OCC(OC(=O)CCCCCCCC=CCC=CCCCCCC)CO)CCCCCCC	530	True	True	False		False	False	null	null	99.9	99.9	null	null	null	26.52	Lipidomics_pos_AH_02	666.43365:1472 667.437:815 668.44036:433		1789.36	3131.91	2080.85	1961.7	2314.89	1110.71	908.929	946.429	700	1055.36	1370	1048	1184	1111	1135	2255.8	944.04
623	15.482	666.602	666.60187_15.482	DG 38:2|DG 18:0_20:2	[M+NH4]+	ion correlated with 312; ion correlated with 370; ion correlated with 677	0.333	True	12.98	666.603	C41H76O5	DG	KUZPKVPIXRZEFX-UHFFFAOYSA-N	O=C(OCC(OC(=O)CCCCCCCCCC=CCC=CCCCCC)CO)CCCCCCCCCCCCCCCCC	410	True	True	True		False	False	null	null	100	100	74.1	87	100	39.24	Lipidomics_pos_CON_01	666.60175:2046 667.6051:1411 668.60846:697	122.9233:27 265.24957:26 291.26874:176 319.29962:26 341.30432:1415 365.30472:1480 393.33762:118 610.39667:45 631.56335:1850 649.57642:166 666.59808:388	568.085	659.574	663.83	778.723	723.404	758.929	946.429	900	898.214	1216.07	2046	1716	1346	2049	1748	678.697	943.482
624	18.653	666.617	666.61658_18.653	CE 18:2	[M+NH4]+	adduct linked to 633_[M+Na]+; similar chromatogram in higher mz_1998; similar chromatogram in higher mz_1895	1	True	14.51	666.618	C45H76O2	CE	NAACPBBQTFFYQB-UHFFFAOYSA-N	O=C(OC1CC2=CCC3C(CCC4(C)C(CCC34)C(C)CCCC(C)C)C2(C)CC1)CCCCCCCC=CCC=CCCCCC	410	True	True	True		False	False	null	null	100	99.9	83.5	82.2	100	187.81	Lipidomics_pos_BL_04	666.61731:6224 667.62066:4754 668.62402:1166	93.07002:7 109.10021:23 121.1003:28 133.10081:16 139.14763:7 159.11685:7 177.16908:7 189.1636:73 203.17947:43 217.19507:40 225.18243:4 229.19415:53 243.20979:114 255.21104:4 271.24207:14 369.35092:4548 543.3576:4 648.60382:8 666.6178:167	8221.28	13304.3	7108.51	10197.9	8897.87	11203.6	11932.1	11421.4	11114.3	14489.3	11436	12896	11903	12603	12864	9545.82	12032
625	14.623	667.526	667.52606_14.623	DG 38:4	[M+Na]+		1	True	12.07	667.527	C41H72O5	DG	URHUMZXHDDPCIM-UHFFFAOYSA-N	O=C(OCC(OC(=O)CCCCCCCCCCCCCCCCC=CCC=CCC=CCC=CCC)CO)CCCCCCC	420	True	True	True		False	False	null	null	100	100	75	75	100	62.44	Lipidomics_pos_CON_02	667.52704:3223 668.53039:1975 669.53375:523	667.52484:5106	4493.62	4561.7	3321.28	6289.36	4944.68	2717.86	2982.14	3637.5	3087.5	3933.93	4097	3223	2353	4462	3147	4722.34	3271.43
626	15.51	668.58	668.58032_15.51	w/o MS2:TG 8:0_8:0_21:1	[M+H]+		0.333	True	12.17	668.582	C40H74O6	TG	CKFLGJUFJQDZBL-UHFFFAOYSA-N	O=C(OCC(OC(=O)CCCCCCC)COC(=O)CCCCCCCCCC=CCCCCCCCCC)CCCCCCC	530	True	True	False		False	False	null	null	98.8	99.9	null	null	null	33.89	Lipidomics_pos_AH_04	668.58032:2268 669.58367:1219 670.58703:1158	81.07001:106 225.22253:26 339.29062:53 369.28159:75 397.34:26 453.39017:27 535.46863:175 651.55786:31 668.45874:151	1489.36	3855.32	1493.62	4825.53	2702.13	1362.5	1850	1723.21	1225	1648.21	907	1110	882	804	1021	2873.4	1561.83
627	14.938	668.594	668.59387_14.938	RIKEN P-VS1 ID-7216 from Mouse_Kidney_fads2KO_N_Ctr	[M+H]+	adduct linked to 522_[M+H-H2O]+; adduct linked to 567_[M+H-H2O]+	1	True	12.26	668.596		Unknown			430	True	True	True		False	False	null	null	84.6	100	87.1	75.5	50	52.81	Lipidomics_pos_CON_01	668.59534:2134 669.59869:1084 670.60205:394	650.6236:40 668.5932:3838	5729.79	6042.55	4936.17	5846.81	5274.47	3435.71	3048.21	3219.64	3237.5	3476.79	2134	1917	1912	2082	2069	5566.3	3283.73
628	19.093	668.632	668.6319_19.093	CE 18:1	[M+NH4]+	adduct linked to 639_[M+Na]+	1	True	14.87	668.634	C45H78O2	CE	RJECHNNFRHZQKU-UHFFFAOYSA-N	O=C(OC1CC2=CCC3C(CCC4(C)C(CCC34)C(C)CCCC(C)C)C2(C)CC1)CCCCCCCC=CCCCCCCCC	410	True	True	True		False	False	null	null	100	99.9	82.1	80	100	154.41	Lipidomics_pos_AH_01	668.63074:3347 669.63409:1508 670.63745:304	99.11633:10 135.11613:48 159.11606:10 189.16203:42 229.19531:21 241.19865:15 368.14661:11 369.35092:2647 563.49878:28 651.60602:29 668.63599:95	7121.28	7619.15	5161.7	7734.04	6453.19	8278.57	7841.07	8926.79	7991.07	10364.3	11328	7628	11423	9973	11625	6818.06	8680.56
629	14.982	669.541	669.5412_14.982	DG 38:3	[M+Na]+	adduct linked to 619_[M+NH4]+	0.2	True	12.62	669.543	C41H74O5	DG	PXVGXGWCFYFAHT-UHFFFAOYSA-N	O=C(OCC(OC(=O)CCCCCCCCCCCCCCC=CCC=CCC=CCCCCCCC)CO)CCCCCCC	420	True	True	True		False	False	null	null	100	100	75	75	100	29.8	Lipidomics_pos_CON_05	669.54315:1337 670.5465:662 671.54986:239	669.56012:2545	912.766	961.702	634.043	831.915	968.085	925	923.214	1085.71	935.714	1289.29	1495	1205	908	1605	1337	861.596	1031.21
630	13.229	670.416	670.41608_13.229	Unknown	[M+H]+		0.8	True	null	null	null	null	null	null	999	False	False	False		False	False	null	null	null	null	null	null	null	26.46	Lipidomics_pos_AH_01	670.41394:1048 671.41729:439 672.42065:319	425.32947:65 495.43719:105 670.39435:520	2229.79	2612.77	3189.36	2442.55	1878.72	2635.71	1635.71	3053.57	2521.43	3044.64	1684	1169	1192	761	1277	2470.9	2578.19
631	16.076	670.597	670.59698_16.076	w/o MS2:TG 8:0_8:0_21:0	[M+H]+	ion correlated with 695	0.467	True	12.93	670.598	C40H76O6	TG	IHRKXLICEICYIW-UHFFFAOYSA-N	O=C(OCC(OC(=O)CCCCCCC)COC(=O)CCCCCCCCCCCCCCCCCCCC)CCCCCCC	530	True	True	False		False	False	null	null	99.7	100	null	null	null	40.68	Lipidomics_pos_AH_04	670.59698:3157 671.60033:1359 672.60369:338	670.49164:12	2459.57	5795.74	2885.11	6717.02	4210.64	2298.21	2735.71	2621.43	2130.36	2573.21	1450	1754	1395	1224	1563	4413.86	2471.65
632	15.604	670.609	670.60913_15.604	w/o MS2:Cer 12:2;2O/30:0	[M+Na]+	adduct linked to 527_[M+H-H2O]+	1	True	12.99	670.611	C42H81NO3	Cer_NS	ASVYVBLABSOACH-UHFFFAOYSA-N	O=C(NC(CO)C(O)C=CCCC=CCCC)CCCCCCCCCCCCCCCCCCCCCCCCCCCCC	530	True	True	False		False	False	null	null	77	100	null	null	null	168.67	Lipidomics_pos_CON_01	670.60913:10783 671.61248:6229 672.61584:1375	668.38037:14 670.6098:2688	15002.1	16844.7	13725.5	15508.5	14587.2	10635.7	11189.3	11421.4	11321.4	12105.4	10783	9186	9009	10024	9221	15133.7	11334.5
633	18.651	671.573	671.57269_18.651	DG 38:2	[M+Na]+	adduct linked to 624_[M+NH4]+; similar chromatogram in higher mz_678	0.8	True	12.85	671.558	C41H76O5	DG	XXICPJXOTUXOGD-UHFFFAOYSA-N	O=C(OCC(OC(=O)CCCCCCCCCCCCCCCCCC=CCC=CCCCCCCC)CO)CCCCCCC	420	True	True	True		False	False	null	null	96.1	99.8	75	75	100	59.36	Lipidomics_pos_AH_02	671.56946:1100 672.57281:446 673.57617:153	671.57037:2773	1791.49	2340.43	1663.83	2527.66	1987.23	2892.86	3142.86	3028.57	2471.43	3042.86	4258	3620	3665	3894	3640	2062.1	2915.6
634	4.442	672.42	672.41974_4.442	Unknown	[M+Na]+	adduct linked to 579_[M+H]+	1	True	null	null	null	null	null	null	999	False	False	False		False	False	null	null	null	null	null	null	null	25.17	Lipidomics_pos_AH_01	672.41949:1258 673.42284:453 674.4262:162	221.13515:35 613.31195:29 655.37219:58	2676.6	3038.3	2729.79	3519.15	2991.49	2558.93	2658.93	3080.36	2839.29	3337.5	1709	1628	1383	1609	1523	2990.72	2895.09
635	15.268	672.568	672.56812_15.268	w/o MS2:SE 28:2/18:5	[M+H]+		0.267	True	13.64	672.571	C46H70O2	BRSE	YFBDJIGIIUFVNM-UHFFFAOYSA-N	O=C(OC1CC2=CCC3C(CCC4(C)C(CCC34)C(C=CC(C)C(C)C)C)C2(C)CC1)CC=CCC=CCC=CCC=CCC=CCC	530	True	True	False		False	False	null	null	64.9	100	null	null	null	16.25	Lipidomics_pos_CON_04	672.56812:1208 673.57147:802 674.57483:434	177.10995:21 373.21042:18 483.35294:18 655.57129:48 672.56714:1760	2504.26	2565.96	2253.19	2285.11	2553.19	1526.79	1632.14	1800	1735.71	1905.36	1181	1072	1078	1208	1100	2432.23	1719.8
636	16.289	672.625	672.62463_16.289	w/o MS2:Cer 12:1;2O/30:0	[M+Na]+	adduct linked to 533_[M+H-H2O]+; adduct linked to 581_[M+H]+	1	True	13.21	672.627	C42H83NO3	Cer_NS	BLSANSOWWRTQOF-UHFFFAOYSA-N	O=C(NC(CO)C(O)C=CCCCCCCC)CCCCCCCCCCCCCCCCCCCCCCCCCCCCC	530	True	True	False		False	False	null	null	76.9	100	null	null	null	125.07	Lipidomics_pos_CON_01	672.62463:11841 673.62798:5428 674.63134:1231	672.62573:2647	9817.02	11161.7	7995.74	10217	10757.4	8673.21	9832.14	8530.36	9885.71	10566.1	11841	9139	8484	9244	9396	9989.71	9497.79
637	14.509	673.477	673.47705_14.509	DG 39:8	[M+Na]+		0.067	True	9.79	673.48	C42H66O5	DG	KKQSXVLCCWGLLM-UHFFFAOYSA-N	O=C(OCC(OC(=O)CCCCC=CCC=CCC=CCC=CCC=CCC=CCC=CCC=CCC)CO)CCCCCCCC	420	True	True	True		False	False	null	null	100	99.9	74.5	75	100	29.86	Lipidomics_pos_AH_04	673.47705:1230 674.4804:798 675.48376:290	400.27374:18 673.48029:1625	693.617	2159.57	831.915	2617.02	1436.17	808.929	946.429	933.929	760.714	1007.14	456	485	330	414	461	1547.79	891.161
638	9.08	673.526	673.52588_9.08	SM 32:2;2O	[M+H]+		0.4	True	8.18	673.528	C37H73N2O6P	SM	FXGRPALUCIOGRO-UHFFFAOYSA-N	O=C(NC(COP(=O)([O-])OCC[N+](C)(C)C)C(O)C=CCCCCCCC)CCCCCCCCCC=CCCCCCCCC	420	True	True	True		False	False	null	null	99.7	100	83.6	81.9	100	20.95	Lipidomics_pos_AH_04	673.52759:1156 674.53094:508 675.5343:122	104.10603:9 184.07278:1977 641.31818:4 673.33801:14 673.52612:988	1859.57	2289.36	1485.11	2459.57	1948.94	1619.64	1389.29	1553.57	1462.5	1410.71	1292	1215	1645	1373	1279	2008.09	1486.94
639	19.099	673.589	673.58862_19.099	DG 38:1	[M+Na]+	adduct linked to 628_[M+NH4]+	0.867	True	13.27	673.574	C41H78O5	DG	YUHZZKCTAUABMN-UHFFFAOYSA-N	O=C(OCC(OC(=O)CCCCCCCCCCCCCCCCCC=CCCCCCCCCCC)CO)CCCCCCC	420	True	True	True		False	False	null	null	97.5	99.8	73.4	75	100	39.13	Lipidomics_pos_AH_05	673.58423:1081 674.58758:389 675.59094:229	305.23083:43 645.62866:28 673.58752:2177	2119.15	2342.55	2000	2663.83	2300	3710.71	3264.29	3255.36	3242.86	3583.93	3763	3755	4227	3798	3777	2285.35	3411.41
640	4.298	674.462	674.46198_4.298	w/o MS2:HexCer 17:2;2O/16:4;O	[M+H]+		0.2	True	7.4	674.463	C39H65NO9	HexCer_HS	UDPCCKREWAKRDX-UHFFFAOYSA-N	O=C(NC(COC1OC(CO)C(O)C(O)C1O)C(O)C=CCCC=CCCCCCCCC)C(O)CC=CCC=CCC=CCC=CCC	530	True	True	False		False	False	null	null	99.9	100	null	null	null	83.57	Lipidomics_pos_BL_04	674.46198:4435 675.46533:2803 676.46869:1438	159.08078:65 219.17261:62 267.12244:823 471.23633:514 489.24933:780 545.31256:1838 657.40918:102	482.979	229.787	346.809	485.106	389.362	1823.21	1746.43	4285.71	7919.64	4801.79	286	99	183	234	169	387.154	4115
641	12.575	674.514	674.51355_12.575	PE O-32:2	[M+H]+		0.733	True	9.61	674.512	C37H72NO7P	EtherPE	KTOBDTMBXPFJPM-UHFFFAOYSA-N	O=C(OC(COC=CCCCCCCCCCCCC)COP(=O)(O)OCCN)CCCCCCCC=CCCCCCCCC	420	True	True	True		False	False	null	null	84.4	100	55.3	59.6	90	47.19	Lipidomics_pos_CON_04	674.51105:3632 675.5144:2110 676.51776:999	83.0839:133 237.22192:119 285.24094:518 339.29236:638 533.4516:54	2697.87	2363.83	2382.98	2646.81	2655.32	3541.07	2860.71	2496.43	2871.43	3239.29	4444	4443	4570	3632	4110	2549.65	3002.1
642	15.988	674.583	674.5835_15.988	w/o MS2:SE 28:2/18:4	[M+H]+		0.933	True	13.94	674.587	C46H72O2	BRSE	YAABELDKCFTGRO-UHFFFAOYSA-N	O=C(OC1CC2=CCC3C(CCC4(C)C(CCC34)C(C=CC(C)C(C)C)C)C2(C)CC1)CCCCC=CCC=CCC=CCC=CCC	530	True	True	False		False	False	null	null	65	100	null	null	null	30.32	Lipidomics_pos_CON_01	674.5835:2036 675.58685:1142 676.59021:420	674.5835:3568	3742.55	4002.13	3048.94	3536.17	3602.13	2232.14	2528.57	2689.29	2610.71	2742.86	2036	1546	1286	1554	1819	3586.28	2560.56
643	15.156	675.495	675.49506_15.156	DG 39:7	[M+Na]+	ion correlated with 591; similar chromatogram in higher mz_665	1	True	10.32	675.496	C42H68O5	DG	NUGBPQVTGLIHPK-UHFFFAOYSA-N	O=C(OCC(OC(=O)CCCCCCCC=CCC=CCC=CCC=CCC=CCC=CCC=CCC)CO)CCCCCCCC	420	True	True	True		False	False	null	null	100	99.9	75	75	100	63.72	Lipidomics_pos_CON_01	675.49512:3521 676.49847:1449 677.50183:619	675.49646:1474	5906.38	17591.5	6187.23	22642.6	10823.4	5821.43	6714.29	6875	4896.43	6400	3521	4630	3406	3074	4015	12629.6	6141.74
644	10.368	675.542	675.54242_10.368	SM 32:1;2O	[M+H]+	adduct linked to 710_[M+Na]+	1	True	8.43	675.544	C37H75N2O6P	SM	WVZYDPLIGWKWEU-UHFFFAOYSA-N	O=C(NC(COP(=O)([O-])OCC[N+](C)(C)C)C(O)C=CCCCCCCC)CCCCCCCCCCCCCCCCCCC	420	True	True	True		False	False	null	null	100	100	87.3	87.2	100	646.32	Lipidomics_pos_AH_03	675.5423:23425 676.54565:10624 677.54901:2318	184.07272:3872 657.52979:27 675.54034:1112	53546.8	61208.5	49840.4	62489.4	53174.5	39573.2	38228.6	38237.5	39985.7	42782.1	62713	58976	61506	60335	58493	56051.7	39761.3
645	8.85	675.675	675.67462_8.85	w/o MS2:CE 18:1(d7)	[M+H]+		0.867	True	14.86	675.678	C45H71D7O2	CE	RJECHNNFRHZQKU-LCUGTLGDNA-N	[C@]12(CC=C3C[C@@H](OC(=O)CCCCCCC/C=C\CCCCCC([2H])([2H])C([2H])([2H])C([2H])([2H])[2H])CC[C@]3(C)[C@@]1([H])CC[C@]1(C)[C@@]([H])([C@@](C)([H])CCCC(C)C)CC[C@@]21[H])[H]	530	True	True	False		False	False	null	null	97.2	99.8	null	null	null	142.43	Lipidomics_pos_AH_01	675.67462:19449 676.67797:10962 677.68133:2719	81.06932:42 111.08026:18 135.11668:34 261.25183:9 303.30466:131 338.34171:3904 675.37384:17 675.67554:254	41380.9	9451.06	10444.7	8357.45	2334.04	4362.5	14417.9	18130.4	29546.4	5435.71	3681	8210	2764	446	836	14394.1	14378.2
646	4.62	676.455	676.45459_4.62	w/o MS2:SL 13:1;O/26:6;O	[M+H]+		1	True	8.1	676.461	C39H65NO6S	SL	XPKVLBYQUICSAB-UHFFFAOYSA-N	O=C(N(CC(O)C=CCCCCCCCC)CS(=O)(=O)O)C(O)CCCCCC=CCC=CCC=CCC=CCC=CCC=CCC	530	True	True	False		False	False	null	null	90.9	99.9	null	null	null	107.74	Lipidomics_pos_CON_01	676.45459:8121 677.45794:3074 678.4613:776	166.05997:8 529.32086:9 676.37823:16	10331.9	11840.4	10042.6	12966	11657.4	5046.43	5532.14	5767.86	5607.14	6441.07	8121	7745	6629	7054	6710	11368.2	5678.97
647	13.487	676.526	676.52637_13.487	PE O-32:1	[M+H]+		0.333	True	10.23	676.528	C37H74NO7P	EtherPE	FDULCEKAOVWBTQ-UHFFFAOYSA-N	O=C(OC(COC=CCCCCCCCCCCCCCC)COP(=O)(O)OCCN)CCCCCCCCCCCCCCC	420	True	True	True		False	False	null	null	95	99.9	95.3	63.2	100	35.65	Lipidomics_pos_BL_04	676.52637:2199 677.52972:1208 678.53308:500	221.22398:61 266.28439:126 313.27301:2773 535.50977:353	778.723	897.872	1089.36	1106.38	997.872	3428.57	3460.71	3857.14	3926.79	3792.86	990	809	669	770	770	974.255	3693.08
648	11.544	676.528	676.52832_11.544	PC O-29:1|PC O-15:1_14:0	[M+H]+		0.133	True	8.66	676.528	C37H74NO7P	EtherPC	JTVZJYMCUHMYIN-UHFFFAOYSA-N	O=C(OC(COCCCCCCCCC=CCCCCC)COP(=O)([O-])OCC[N+](C)(C)C)CCCCCCCCCCCCC	410	True	True	True		False	False	null	null	100	100	80.8	77.9	100	25.27	Lipidomics_pos_CON_01	676.52753:1567 677.53088:549 678.53424:0	184.0732:3639 466.32495:32 676.5249:2387	2100	2272.34	2102.13	2348.94	2229.79	1339.29	1398.21	1448.21	1466.07	1562.5	1567	1856	1956	1463	1509	2210.59	1443.06
649	16.242	676.658	676.65845_16.242	Cer 44:1;3O|Cer 20:1;2O/24:0;O	[M+H-H2O]+	adduct linked to 601_[M+H-H2O]+	0.333	True	13.28	676.66	C44H87NO4	Cer_HS	ZEHOOLFQJBPFJO-UHFFFAOYSA-N	O=C(NC(CO)C(O)C=CCCCCCCCCCCCCCCC)C(O)CCCCCCCCCCCCCCCCCCCCCC	410	True	True	True		False	False	null	null	100	100	18.2	82.7	100	25.82	Lipidomics_pos_CON_04	676.6582:1582 677.66155:649 678.66491:246	121.09879:24 135.12088:31 262.25153:16 280.2648:22 292.29922:842 310.28726:12 540.88971:24 630.24384:17 658.64777:2292 676.63818:231	1010.64	1161.7	940.426	1053.19	1225.53	1083.93	1273.21	1042.86	1278.57	1275	1992	1482	1397	1582	1496	1078.59	1190.89
650	5.864	677.458	677.4585_5.864	w/o MS2:SL 12:2;O/26:6;O	[M+H]+		0.333	True	7.38	677.456	C38H61NO6S	SL	SYPXKKXGYOOXMN-UHFFFAOYSA-N	O=C(N(CC(O)C=CCCC=CCCC)CS(=O)(=O)O)C(O)CCCCCC=CCC=CCC=CCC=CCC=CCC=CCC	530	True	True	False		False	False	null	null	98.1	100	null	null	null	23.95	Lipidomics_pos_CON_02	677.4585:1980 678.46185:1366 679.46521:503	399.24127:4 677.4588:4293	2593.62	2393.62	2129.79	2272.34	1670.21	1823.21	2825	1451.79	1278.57	1208.93	1124	1980	953	928	987	2212.15	1717.61
651	15.83	677.51	677.5105_15.83	DG 39:6	[M+Na]+		1	True	11.16	677.511	C42H70O5	DG	HKDREXBACGRUKF-UHFFFAOYSA-N	O=C(OCC(OC(=O)CCCCCCCCCCC=CCC=CCC=CCC=CCC=CCC=CCC)CO)CCCCCCCC	420	True	True	True		False	False	null	null	100	99.9	75	75	100	174.07	Lipidomics_pos_BL_05	677.51123:11825 678.51458:5131 679.51794:1825	677.50922:814	20410.6	45391.5	21648.9	48880.9	32736.2	17933.9	21391.1	20741.1	16362.5	21116.1	10544	12875	10755	9306	11580	33812.8	19509.3
652	10.92	677.558	677.55817_10.92	SM 32:0;2O	[M+H]+		1	True	8.81	677.559	C37H77N2O6P	SM	MCCRWVNDSLPCEX-UHFFFAOYSA-N	O=C(NC(COP(=O)([O-])OCC[N+](C)(C)C)C(O)CCCCCCCCC)CCCCCCCCCCCCCCCCCCC	420	True	True	True		False	False	null	null	98.7	100	74.7	83.6	100	27.24	Lipidomics_pos_CON_03	677.55707:3205 678.56042:1618 679.56378:368	86.09755:17 184.05585:17 184.07407:596 185.07642:22 677.45282:22 677.50232:29 677.55713:248	2991.49	3223.4	2795.74	3378.72	3057.45	4851.79	4921.43	4758.93	5239.29	4660.71	3342	2672	3205	3078	2830	3089.2	4886.47
653	5.407	678.469	678.46893_5.407	w/o MS2:SL 13:1;O/26:5;O	[M+H]+		1	True	8.28	678.476	C39H67NO6S	SL	VWRLGQTWXPMICE-UHFFFAOYSA-N	O=C(N(CC(O)C=CCCCCCCCC)CS(=O)(=O)O)C(O)CCCCCCCCC=CCC=CCC=CCC=CCC=CCC	530	True	True	False		False	False	null	null	86.7	100	null	null	null	26.29	Lipidomics_pos_CON_01	678.46893:2599 679.47228:1035 680.47564:270	175.12962:21 496.32925:16 677.38873:39	3444.68	4093.62	3523.4	3995.74	4302.13	3023.21	3171.43	3326.79	3103.57	3776.79	2599	2414	2268	2318	2031	3871.99	3280.04
654	6.075	678.47	678.47046_6.075	w/o MS2:SL 13:1;O/26:5;O	[M+H]+		1	True	8.28	678.476	C39H67NO6S	SL	VWRLGQTWXPMICE-UHFFFAOYSA-N	O=C(N(CC(O)C=CCCCCCCCC)CS(=O)(=O)O)C(O)CCCCCCCCC=CCC=CCC=CCC=CCC=CCC	530	True	True	False		False	False	null	null	91.4	100	null	null	null	52.34	Lipidomics_pos_CON_01	678.47046:5502 679.47381:1991 680.47717:509	184.07292:2091 678.46887:2410	6844.68	8517.02	7472.34	8921.28	8117.02	4119.64	3800	4051.79	4180.36	4912.5	5502	4845	4404	4842	4480	7974.47	4212.9
655	10.357	678.506	678.50629_10.357	PC 28:0	[M+H]+	adduct linked to 717_[M+Na]+	1	True	8.26	678.507	C36H72NO8P	PC	CITHEXJVPOWHKC-UHFFFAOYSA-N	O=C(OCC(OC(=O)CCCCCCCCCCCCC)COP(=O)([O-])OCC[N+](C)(C)C)CCCCCCCCCCCCC	420	True	True	True		False	False	null	null	94.2	100	87.2	77.9	100	362.58	Lipidomics_pos_BL_05	678.50586:27159 679.50921:11077 680.51257:2329	125.00376:20 184.0731:4659 678.50494:2081	16683	19376.6	15997.9	19397.9	16704.3	42069.6	45651.8	43166.1	45242.9	48498.2	60376	56555	58454	57167	55695	17631.8	44926
656	11.744	678.543	678.54327_11.744	PC O-29:0	[M+H]+		0.933	True	9.14	678.543	C37H76NO7P	EtherPC	ZQGOFPZFTPJOJU-UHFFFAOYSA-N	O=C(OC(COCCCCCCCC)COP(=O)([O-])OCC[N+](C)(C)C)CCCCCCCCCCCCCCCCCCCC	420	True	True	True		False	False	null	null	93.3	100	80.3	76.2	100	20.53	Lipidomics_pos_CON_05	678.54327:2649 679.54662:1391 680.54998:0	184.07283:3829 678.53876:2627	2378.72	3340.43	2765.96	4042.55	2642.55	2226.79	3250	2894.64	2957.14	2996.43	2202	1789	2267	1993	2649	3034.12	2865.09
657	16.852	678.675	678.67493_16.852	w/o MS2:Cer 12:0;2O/32:0;O	[M+H]+		0.133	True	13.36	678.676	C44H89NO4	Cer_HDS	QKIUNTYNMPNNCZ-UHFFFAOYSA-N	O=C(NC(CO)C(O)CCCCCCCCC)C(O)CCCCCCCCCCCCCCCCCCCCCCCCCCCCCC	530	True	True	False		False	False	null	null	99.7	99.9	null	null	null	15.46	Lipidomics_pos_CON_01	678.67493:1174 679.67828:564 680.68164:169	239.23499:10 252.2673:49 280.29794:135 630.65424:44 642.65436:207 678.50464:137	968.085	1144.68	891.489	1208.51	1061.7	1023.21	1178.57	996.429	1112.5	1226.79	1174	851	892	918	1111	1055.24	1107.08
658	5.065	680.449	680.44891_5.065	PS 28:0	[M+H]+		0.267	True	7.71	680.45	C34H66NO10P	PS	WKJDWDLHIOUPPL-UHFFFAOYSA-N	O=C(OCC(OC(=O)CCCCCCCCCCCCC)COP(=O)(O)OCC(N)C(=O)O)CCCCCCCCCCCCC	420	True	True	True		False	False	null	null	80.7	100	46.8	68	75	21.63	Lipidomics_pos_CON_01	680.44891:1955 681.45226:908 682.45562:343	155.10783:27 495.40598:124 600.48267:17 663.44806:60	1668.09	2304.26	2031.91	2380.85	1457.45	960.714	1251.79	1385.71	1476.79	1428.57	1955	1862	524	1889	1822	1968.06	1300.69
659	13.406	680.478	680.47845_13.406	w/o MS2:RIKEN P-VS1 ID-7491 from Mouse_Macrophage_WT_N_F1AA	[M+NH4]+	adduct linked to 614_[M+H]+; similar chromatogram in higher mz_812	1	True	9.91	680.482		Unknown			530	True	True	False		False	False	null	null	70.7	99.9	null	null	null	662.05	Lipidomics_pos_BL_04	680.47845:107259 681.4818:57001 682.48516:12545	383.13766:126 439.20102:577 551.32739:8924 605.38147:27 608.3949:71 663.45239:27491	135266	115355	121064	139000	120264	83558.9	100814	159902	191534	167332	70977	45565	48657	54556	51883	126190	140628
660	9.888	680.523	680.52258_9.888	w/o MS2:SE 24:1;O4/19:5	[M+H]+	ion correlated with 960; similar chromatogram in higher mz_1523	0.333	True	9	680.525	C43H66O5	DCAE	FXYCHYPWFIXMDH-UHFFFAOYSA-N	O=C(O)CCC(C)C1CCC2C3CCC4CC(OC(=O)CCC=CCC=CCC=CCC=CCC=CCC)CCC4(C)C3CC(O)C12C	530	True	True	False		False	False	null	null	63.1	100	null	null	null	14.78	Lipidomics_pos_CON_01	680.52258:2103 681.52593:750 682.52929:203	132.90964:7 551.32697:40 600.47015:8 636.49463:10 680.5199:2487	1444.68	1676.6	1408.51	1502.13	1361.7	1314.29	1526.79	1148.21	1282.14	1339.29	2103	1925	1970	1823	1829	1478.16	1322.12
661	15.258	680.58	680.58032_15.258	TG 38:2|TG 10:0_10:0_18:2	[M+NH4]+	ion correlated with 723; similar chromatogram in higher mz_723; similar chromatogram in higher mz_1396	0.533	True	12.49	680.582	C41H74O6	TG	VSZUFXULXCVQDQ-UHFFFAOYSA-N	O=C(OCC(OC(=O)CCCCCCCCC)COC(=O)CCCCCCCCC)CCCCCCCC=CCC=CCCCCC	410	True	True	True		False	False	null	null	100	100	15.4	35.7	100	24.11	Lipidomics_pos_AH_02	680.58038:2767 681.58373:1550 682.58709:901	71.08326:34 191.1768:13 247.23814:25 353.26663:21 381.29831:627 383.31427:557 491.354:25 491.40677:87 523.25531:40 551.32831:149 575.5022:404 607.38861:323 620.42029:14 645.54218:37 663.45105:1553 680.58057:1566	2074.47	5887.23	2000	6770.21	3351.06	1719.64	2294.64	2410.71	1600	1939.29	1236	1618	1102	972	1344	4016.78	1992.72
662	13.402	681.481	681.48132_13.402	w/o MS2:SL 12:1;O/26:5;O	[M+H-H2O]+	adduct linked to 812_[M+H]+	0.4	True	8.15	681.487	C38H65NO6S	SL	CEOMZIMPQHDXNK-UHFFFAOYSA-N	O=C(N(CC(O)C=CCCCCCCC)CS(=O)(=O)O)C(O)CCCCCCCCC=CCC=CCC=CCC=CCC=CCC	530	True	True	False		False	False	null	null	93.6	99.9	null	null	null	466.43	Lipidomics_pos_AH_03	681.48218:25410 682.48553:7499 683.48889:1213	440.20129:104 552.3302:1920 664.4566:17469	55242.6	50359.6	54063.8	60325.5	57172.3	40055.4	44366.1	72233.9	87862.5	77516.1	29527	20104	22335	24095	23897	55432.8	64407
663	13.791	681.484	681.48395_13.791	w/o MS2:SL 12:1;O/26:5;O	[M+H]+		0.267	False	8.15	681.487	C38H65NO6S	SL	CEOMZIMPQHDXNK-UHFFFAOYSA-N	O=C(N(CC(O)C=CCCCCCCC)CS(=O)(=O)O)C(O)CCCCCCCCC=CCC=CCC=CCC=CCC=CCC	530	True	True	False		False	False	null	null	95.1	99.8	null	null	null	13.53	Lipidomics_pos_BL_05	681.48395:1872 682.4873:1017 683.49066:272		3365.96	3455.32	2887.23	3344.68	3595.74	3041.07	2875	2908.93	3517.86	3342.86	1538	1257	1504	1554	1325	3329.71	3137.46
664	12.125	682.561	682.56128_12.125	HexCer 34:1;2O	[M+H-H2O]+	similar chromatogram in higher mz_745	1	True	9.21	682.562	C40H77NO8	HexCer_NS	VJLLLMIZEJJZTE-UHFFFAOYSA-N	O=C(NC(COC1OC(CO)C(O)C(O)C1O)C(O)C=CCCCCCCCCCCCCC)CCCCCCCCCCCCCCC	420	True	True	True		False	False	null	null	81.6	100	95.1	29.9	87.5	47.2	Lipidomics_pos_BL_04	682.56042:2680 683.56377:1428 684.56713:297	264.26987:3125 490.51208:97 502.49939:587 520.50598:454	3968.09	3919.15	3393.62	4276.6	4410.64	5042.86	5012.5	4957.14	4785.71	4701.79	3416	3378	3336	3538	3083	3993.7	4900.02
665	15.161	682.594	682.59424_15.161	w/o MS2:TG 8:0_8:0_22:1	[M+H]+		0.133	True	12.9	682.598	C41H76O6	TG	YVQQPMBBHUVFSC-UHFFFAOYSA-N	O=C(OCC(OC(=O)CCCCCCC)COC(=O)CCCCCCCCCCCC=CCCCCCCCC)CCCCCCC	530	True	True	False		False	False	null	null	96.2	100	null	null	null	24.65	Lipidomics_pos_AH_04	682.59424:1670 683.59759:813 684.60095:313	87.04531:25 258.90149:73 410.33585:38 553.33472:20 665.46069:107 682.59442:1100	1131.91	3165.96	1034.04	3553.19	2300	826.786	980.357	1119.64	805.357	1078.57	485	558	443	395	563	2236.33	962.054
666	15.851	682.597	682.59686_15.851	TG 38:1|TG 8:0_14:0_16:1	[M+NH4]+	adduct linked to 679_[M+Na]+; similar chromatogram in higher mz_730; similar chromatogram in higher mz_1294	1	True	12.86	682.598	C41H76O6	TG	NNZSUHQLGWBIDD-UHFFFAOYSA-N	O=C(OCC(OC(=O)CCCCCCCCCCCCC)COC(=O)CCCCCCCC=CCCCCCC)CCCCCCC	410	True	True	True		False	False	null	null	100	100	57.9	89.2	100	152.6	Lipidomics_pos_BL_01	682.59735:5974 683.6007:3374 684.60406:1957	69.07331:14 71.08412:52 149.13097:14 239.23703:22 265.25223:105 383.27063:73 395.31284:13 411.34689:201 437.3623:483 521.39294:14 521.4549:191 563.50452:17 577.51935:126 665.45911:139 682.55402:73	11257.4	44931.9	13270.2	45851.1	23759.6	10667.9	14025	14294.6	10546.4	12739.3	7308	8900	6852	5689	8204	27813.9	12454.9
667	14.623	683.5	683.50006_14.623	w/o MS2:SL 12:1;O/26:4;O	[M+H]+	ion correlated with 611	1	True	8.34	683.503	C38H67NO6S	SL	NPYCAUYUOUSPAY-UHFFFAOYSA-N	O=C(N(CC(O)C=CCCCCCCC)CS(=O)(=O)O)C(O)CCCCCCCCCCCC=CCC=CCC=CCC=CCC	530	True	True	False		False	False	null	null	98.2	99.8	null	null	null	106.56	Lipidomics_pos_CON_04	683.50006:9717 684.50341:5402 685.50677:2165	609.39197:40 683.50067:11141	12342.6	10591.5	8517.02	13842.6	10678.7	5855.36	6403.57	7808.93	6928.57	8967.86	8258	6834	4887	9717	6948	11194.5	7192.81
668	14.125	684.203	684.20258_14.125	Unknown	[M+H]+		1	True	null	null	null	null	null	null	999	False	False	False		False	False	null	null	null	null	null	null	null	80.31	Lipidomics_pos_AH_01	684.20166:2211 685.20501:1644 686.20837:969	147.06624:158 313.26883:26 411.30911:186 425.31857:87 651.13947:28 684.20172:2851	4704.26	4365.96	4536.17	4472.34	5351.06	4028.57	3910.71	3817.86	6925	4251.79	1971	2049	1942	2008	2174	4685.66	4587.1
669	7.472	684.561	684.56116_7.472	w/o MS2:SE 24:1;O4/19:3	[M+H]+		1	True	9.12	684.556	C43H70O5	DCAE	JFULBHAVPSRQBJ-UHFFFAOYSA-N	O=C(O)CCC(C)C1CCC2C3CCC4CC(OC(=O)CCCCCCCCC=CCC=CCC=CCC)CCC4(C)C3CC(O)C12C	530	True	True	False		False	False	null	null	61.1	100	null	null	null	28.25	Lipidomics_pos_CON_02	684.56116:3311 685.56451:1470 686.56787:416	85.10148:30 101.09641:77 132.90417:4 133.08586:37 161.1188:10 186.22076:9 221.13788:10 265.16382:7 321.22815:4 667.5379:32 684.56152:2083	4123.4	4625.53	3510.64	3951.06	2438.3	3121.43	4223.21	2251.79	2330.36	2175	2014	3311	1745	1428	1574	3729.68	2820.27
670	14.938	684.569	684.56866_14.938	w/o MS2:HexCer 16:0;2O/18:0	[M+H]+		1	True	9.73	684.577	C40H79NO8	HexCer_NDS	PXJOCHRSCKYEEA-UHFFFAOYSA-N	O=C(NC(COC1OC(CO)C(O)C(O)C1O)C(O)CCCCCCCCCCCCC)CCCCCCCCCCCCCCCCC	530	True	True	False		False	False	null	null	82.1	99.9	null	null	null	35.84	Lipidomics_pos_AH_04	684.56866:4011 685.57201:2115 686.57537:788	684.56696:348	8093.62	8400	7034.04	8534.04	7061.7	5021.43	4325	4164.29	4730.36	5201.79	2928	2399	2881	2874	2740	7824.68	4688.17
671	16.41	684.612	684.61243_16.41	TG 38:0|TG 8:0_12:0_18:0	[M+NH4]+	adduct linked to 690_[M+Na]+; similar chromatogram in higher mz_742; similar chromatogram in higher mz_1313	1	True	13.29	684.614	C41H78O6	TG	MQMPGQDTEMGLPF-UHFFFAOYSA-N	O=C(OCC(OC(=O)CCCCCCCCCCC)COC(=O)CCCCCCCCCCCCCCCCC)CCCCCCC	410	True	True	True		False	False	null	null	100	100	73.4	73.3	100	148.57	Lipidomics_pos_CON_01	684.61285:10897 685.6162:4463 686.61956:1011	99.07978:36 355.272:18 383.31393:172 467.40866:320 523.47504:121 684.61218:267	19125.5	51953.2	19257.4	55993.6	32083	16148.2	19214.3	19639.3	15078.6	20062.5	10897	13215	9799	9091	11928	35682.7	18028.8
672	13.399	685.434	685.43372_13.399	w/o MS2:SM 32:7;2O	[M+Na]+	adduct linked to 614_[M+H]+; similar chromatogram in higher mz_815	1	True	6.61	685.432	C37H63N2O6P	SM	XKTXCUCZGOGZTL-UHFFFAOYSA-N	O=C(NC(COP(=O)([O-])OCC[N+](C)(C)C)C(O)C=CCCC=CCCC)CCCC=CCC=CCC=CCC=CCC=CCC	530	True	True	False		False	False	null	null	98.8	99.8	null	null	null	231.76	Lipidomics_pos_BL_04	685.43372:20592 686.43707:9968 687.44043:3028	668.46411:28 685.38324:303 685.43457:6698 685.50427:28 685.55304:53	33708.5	28061.7	26376.6	28731.9	30559.6	24975	25753.6	33901.8	36771.4	35062.5	12901	8743	9425	10582	10187	29488	31292.7
673	15.21	685.515	685.51501_15.21	w/o MS2:SL 12:1;O/26:3;O	[M+H]+	ion correlated with 618	0.2	True	8.64	685.518	C38H69NO6S	SL	FHGXAFIGZUCTFL-UHFFFAOYSA-N	O=C(N(CC(O)C=CCCCCCCC)CS(=O)(=O)O)C(O)CCCCCCCCCC=CCC=CCC=CCCCCCCC	530	True	True	False		False	False	null	null	97	99.8	null	null	null	43.31	Lipidomics_pos_CON_04	685.51501:2953 686.51836:1712 687.52172:639	685.51471:221	808.511	238.298	704.255	446.809	744.681	642.857	839.286	955.357	816.071	1100	2507	1900	1405	2953	2097	588.005	870.737
674	14.974	685.516	685.51611_14.974	w/o MS2:SL 12:1;O/26:3;O	[M+H]+	ion correlated with 619	0.467	True	8.64	685.518	C38H69NO6S	SL	FHGXAFIGZUCTFL-UHFFFAOYSA-N	O=C(N(CC(O)C=CCCCCCCC)CS(=O)(=O)O)C(O)CCCCCCCCCC=CCC=CCC=CCCCCCCC	530	True	True	False		False	False	null	null	98.7	99.8	null	null	null	40.01	Lipidomics_pos_CON_04	685.51611:3515 686.51946:2321 687.52282:659	617.46613:31 685.50549:758	1938.3	1606.38	1514.89	2151.06	1859.57	2205.36	2171.43	2298.21	2387.5	2750	3473	2732	1961	3515	2819	1814.6	2362.32
675	11.633	685.563	685.56281_11.633	DG 39:2	[M+Na]+	adduct linked to 731_[M+H]+; similar chromatogram in higher mz_2183	0.333	True	13.01	685.574	C42H78O5	DG	VJIVYXKALSBZCR-UHFFFAOYSA-N	O=C(OCC(OC(=O)CCCCCCCCCCCCCCCCCC=CCC=CCCCCCCC)CO)CCCCCCCC	420	True	True	True		False	False	null	null	91.4	100	70.7	75	100	23.56	Lipidomics_pos_CON_03	685.56042:1458 686.56377:2227 687.56713:0	626.49188:123 685.56201:1840	1382.98	2065.96	1693.62	1248.94	968.085	875	994.643	1046.43	1012.5	1019.64	1322	1326	1458	1622	1209	1471.33	989.754
676	15.6	686.584	686.58368_15.6	w/o MS2:SE 28:2/19:5	[M+H]+		1	True	13.84	686.587	C47H72O2	BRSE	NXXNDKYCZMDEJZ-UHFFFAOYSA-N	O=C(OC1CC2=CCC3C(CCC4(C)C(CCC34)C(C=CC(C)C(C)C)C)C2(C)CC1)CCC=CCC=CCC=CCC=CCC=CCC	530	True	True	False		False	False	null	null	65.2	100	null	null	null	175.94	Lipidomics_pos_CON_01	686.58368:13082 687.58703:6586 688.59039:2713	469.35464:20 686.58282:1435	21168.1	21723.4	18687.2	20795.7	19236.2	15946.4	16107.1	16058.9	15953.6	17225	13082	11073	11569	12696	11972	20322.1	16258
677	15.478	687.53	687.5304_15.478	w/o MS2:SL 12:1;O/26:2;O	[M+H]+	ion correlated with 312; ion correlated with 623	0.333	True	8.69	687.534	C38H71NO6S	SL	BXTXZZHNYIACHC-UHFFFAOYSA-N	O=C(N(CC(O)C=CCCCCCCC)CS(=O)(=O)O)C(O)CCCCCCCCCCCCC=CCC=CCCCCCCC	530	True	True	False		False	False	null	null	96.6	99.8	null	null	null	33.23	Lipidomics_pos_CON_01	687.5304:2016 688.53375:1055 689.53711:928	409.33255:60 687.55872:3709	691.489	714.894	627.66	1080.85	646.809	1005.36	1164.29	1107.14	1103.57	1285.71	2016	1585	1348	2016	1731	752.713	1133.1
678	18.649	687.546	687.54602_18.649	w/o MS2:SM 12:1;2O/21:1	[M+H]+		1	True	8.52	687.544	C38H75N2O6P	SM	ATYPPKORCLGACB-UHFFFAOYSA-N	O=C(NC(COP(=O)([O-])OCC[N+](C)(C)C)C(O)C=CCCCCCCC)CCCCCCCCCC=CCCCCCCCCC	530	True	True	False		False	False	null	null	98.4	99.5	null	null	null	44.52	Lipidomics_pos_CON_04	687.54602:4166 688.54937:2964 689.55273:1181	687.54712:153	3027.66	2946.81	2365.96	2717.02	2523.4	4557.14	4257.14	4414.29	4119.64	4498.21	3766	3696	3723	4166	4007	2716.06	4369.69
679	15.854	687.552	687.55249_15.854	TG 38:1|TG 10:0_10:0_18:1	[M+Na]+	adduct linked to 666_[M+NH4]+	1	True	13.19	687.553	C41H76O6	TG	YEPUCWOBELVDPZ-UHFFFAOYSA-N	O=C(OCC(OC(=O)CCCCCCCCC)COC(=O)CCCCCCCCC)CCCCCCCC=CCCCCCCCC	410	True	True	True		False	False	null	null	100	100	74.6	73.3	100	43.97	Lipidomics_pos_AH_04	687.55249:4807 688.55584:2658 689.5592:589	95.08542:10 227.12456:10 405.29877:86 515.40411:22 524.47101:30 687.55621:5027	3038.3	8982.98	3404.26	10227.7	5995.74	2908.93	3830.36	3737.5	2417.86	3357.14	1922	2433	1929	1495	1859	6329.97	3250.11
680	4.442	688.394	688.39355_4.442	w/o MS2:PC 28:6	[M+H]+		1	True	6.22	688.395	C36H60NO8P	PC	FAQHJTOPHZSFOO-UHFFFAOYSA-N	O=C(OCC(OC(=O)CCC=CCC=CCC=CCC=CCC=CCC=CCC)COP(=O)([O-])OCC[N+](C)(C)C)CCCCC	530	True	True	False		False	False	null	null	99.5	100	null	null	null	23.05	Lipidomics_pos_CON_02	688.39355:1735 689.3969:737 690.40026:267	86.09629:76 162.95561:97 505.29446:42 629.32007:511 688.3186:48 688.39435:1975	2425.53	3076.6	3240.43	3357.45	3197.87	2414.29	2517.86	2587.5	2683.93	2855.36	1618	1735	1577	1556	1494	3059.34	2611.72
681	3.232	688.52	688.51965_3.232	w/o MS2:HexCer 16:0;2O/19:5	[M+H]+		0.333	True	8.5	688.515	C41H71NO8	HexCer_NDS	PLXLKWLBYJCACZ-UHFFFAOYSA-N	O=C(NC(COC1OC(CO)C(O)C(O)C1O)C(O)CCCCCCCCCCCCC)CCC=CCC=CCC=CCC=CCC=CCC	530	True	True	False		False	False	null	null	93.8	99.9	null	null	null	15.07	Lipidomics_pos_CON_02	688.51965:1549 689.523:921 690.52636:204	113.13211:25 133.08701:246 213.22141:47 671.4375:28 688.52002:3490	1721.28	2002.13	2559.57	1936.17	1665.96	1326.79	2067.86	1860.71	967.857	1160.71	904	1549	1130	784	862	1977.18	1476.74
682	11.201	688.525	688.52478_11.201	w/o MS2:PC O-8:0_22:2	[M+H]+		0.333	True	8.68	688.528	C38H74NO7P	EtherPC	HQCTYYIKBFPYOO-UHFFFAOYSA-N	O=C(OC(COCCCCCCCC)COP(=O)([O-])OCC[N+](C)(C)C)CCCCCCCCCCCC=CCC=CCCCCC	530	True	True	False		False	False	null	null	97.9	100	null	null	null	20.06	Lipidomics_pos_CON_03	688.52478:1836 689.52813:0 690.53149:0	123.11502:17 415.23431:25 505.34274:70 671.46985:18 688.51996:2111	2431.91	2142.55	2031.91	2323.4	2119.15	1150	1301.79	1132.14	1300	1282.14	1806	1657	1836	1829	1775	2209.92	1232.97
683	13.059	688.527	688.52704_13.059	PE O-33:2	[M+H]+		0.667	True	10.01	688.528	C38H74NO7P	EtherPE	AUVOXOHIAIQYLU-UHFFFAOYSA-N	O=C(OC(COC=CCCCCCCCCCCCCCC)COP(=O)(O)OCCN)CCCCCCCC=CCCCCCCC	420	True	True	True		False	False	null	null	87.4	100	91	58.8	90	28.11	Lipidomics_pos_CON_01	688.52563:3144 689.52898:1908 690.53234:871	69.0685:85 93.06863:118 294.27936:56 325.27277:1943 462.30005:114 547.51019:441	2048.94	2144.68	2048.94	2051.06	2055.32	2073.21	2166.07	1978.57	2258.93	2603.57	3144	2962	3119	3125	3151	2069.87	2215.92
684	15.88	688.598	688.59827_15.88	w/o MS2:SE 28:2/19:4	[M+H]+		0.267	True	14.09	688.603	C47H74O2	BRSE	ZNKOFJNOJYEHQU-UHFFFAOYSA-N	O=C(OC1CC2=CCC3C(CCC4(C)C(CCC34)C(C=CC(C)C(C)C)C)C2(C)CC1)CCCCCC=CCC=CCC=CCC=CCC	530	True	True	False		False	False	null	null	94.9	100	null	null	null	20.16	Lipidomics_pos_BL_02	688.59827:1215 689.60162:696 690.60498:345	384.31778:21 688.40216:31	1385.11	1512.77	1323.4	1223.4	1400	1975	2169.64	2132.14	2051.79	1994.64	620	611	547	618	658	1369.2	2064.44
685	16.289	688.6	688.60004_16.289	w/o MS2:SE 28:2/19:4	[M+H]+		1	True	14.09	688.603	C47H74O2	BRSE	ZNKOFJNOJYEHQU-UHFFFAOYSA-N	O=C(OC1CC2=CCC3C(CCC4(C)C(CCC34)C(C=CC(C)C(C)C)C)C2(C)CC1)CCCCCC=CCC=CCC=CCC=CCC	530	True	True	False		False	False	null	null	65.7	100	null	null	null	132.09	Lipidomics_pos_CON_01	688.60004:12836 689.60339:5807 690.60675:2293	688.59894:1478	13348.9	14040.4	10548.9	13138.3	13489.4	10683.9	12205.4	11250	13926.8	13941.1	12836	10458	10436	10378	10689	12913.4	12401.5
686	17.984	688.602	688.60156_17.984	CE 20:5	[M+NH4]+		0.933	True	14.23	688.603	C47H74O2	CE	XZFUGMCJZFRBKF-UHFFFAOYSA-N	O=C(OC1CC2=CCC3C(CCC4(C)C(CCC34)C(C)CCCC(C)C)C2(C)CC1)CCCC=CCC=CCC=CCC=CCC=CCC	410	True	True	True		False	False	null	null	100	99.9	81.8	80.9	100	36.75	Lipidomics_pos_AH_01	688.60071:1579 689.60406:985 690.60742:199	131.06784:25 135.11752:107 219.21025:78 313.28711:67 369.35046:3787 567.32788:28 671.38739:70 688.59552:200	3359.57	4825.53	2759.57	4587.23	3470.21	1892.86	2060.71	2392.86	2501.79	2541.07	3314	3362	3281	3422	3410	3800.88	2277.66
687	15.504	689.51	689.51038_15.504	DG 40:7	[M+Na]+		0.133	True	10.63	689.511	C43H70O5	DG	NNTGBQPBZSLUJY-UHFFFAOYSA-N	O=C(OCC(OC(=O)CCCCCCCCCC=CCC=CCC=CCC=CCC=CCC=CCC=CCC)CO)CCCCCCC	420	True	True	True		False	False	null	null	100	99.9	75	75	100	28.6	Lipidomics_pos_AH_02	689.51086:1471 690.51421:869 691.51757:284	89.05771:20 689.36713:19 689.51141:2159	1346.81	3129.79	1442.55	3868.09	2200	1400	1528.57	1517.86	1217.86	1387.5	688	1015	852	575	899	2397.21	1410.58
688	11.036	689.558	689.55811_11.036	SM 33:1;2O|SM 17:1;2O/16:0	[M+H]+	adduct linked to 762_[M+Na]+	1	True	8.58	689.559	C38H77N2O6P	SM	RXLZIONNUYYHHW-UHFFFAOYSA-N	O=C(NC(COP(=O)([O-])OCC[N+](C)(C)C)C(O)C=CCCCCCCCCCCCC)CCCCCCCCCCCCCCC	410	True	True	True		False	False	null	null	100	100	85.8	84	100	524.78	Lipidomics_pos_CON_03	689.55768:59098 690.56103:27974 691.56439:6714	184.07304:10803 250.25229:33 548.4718:53 689.55621:4102	60806.4	65772.3	55744.7	67683	61676.6	32733.9	33491.1	33307.1	34221.4	36653.6	61911	58770	59098	57452	56734	62336.9	34081.4
689	19.094	689.561	689.56116_19.094	w/o MS2:SM 12:1;2O/21:0	[M+H]+		0.733	True	8.73	689.559	C38H77N2O6P	SM	REEYJRIAQSUMNO-UHFFFAOYSA-N	O=C(NC(COP(=O)([O-])OCC[N+](C)(C)C)C(O)C=CCCCCCCC)CCCCCCCCCCCCCCCCCCCC	530	True	True	False		False	False	null	null	99	99.5	null	null	null	34.19	Lipidomics_pos_CON_05	689.56116:2921 690.56451:1776 691.56787:577	689.49213:55 689.54413:28 689.56158:213 689.63116:28	2614.89	2493.62	1893.62	2172.34	2210.64	3708.93	3369.64	3632.14	3210.71	3582.14	2656	2774	2846	2641	2921	2277.15	3500.76
690	16.408	689.568	689.56836_16.408	TG 38:0|TG 10:0_10:0_18:0	[M+Na]+	adduct linked to 671_[M+NH4]+	1	True	13.46	689.569	C41H78O6	TG	AMSHZNDZYYUTCY-UHFFFAOYSA-N	O=C(OCC(OC(=O)CCCCCCCCC)COC(=O)CCCCCCCCCCCCCCCCC)CCCCCCCCC	410	True	True	True		False	False	null	null	100	100	74.4	73.1	100	48.96	Lipidomics_pos_AH_01	689.56799:2192 690.57134:789 691.5747:364	109.09942:9 405.29691:28 416.23434:7 517.42462:25 551.48462:22 551.50275:23 689.57288:4118	4663.83	11346.8	4906.38	13706.4	8812.77	4482.14	5416.07	5135.71	4105.36	5582.14	2711	3337	2857	2493	2944	8687.21	4944.24
691	16.289	689.601	689.60083_16.289	DG 39:0	[M+Na]+		0.2	True	13.4	689.605	C42H82O5	DG	MGRVGISHKMIYFG-UHFFFAOYSA-N	O=C(OCC(OC(=O)CCCCCCC)CO)CCCCCCCCCCCCCCCCCCCCCCCCCCCCCC	420	True	True	True		False	False	null	null	100	100	72.4	75	100	49.53	Lipidomics_pos_BL_02	689.60083:3116 690.60418:1334 691.60754:546	343.21689:12 411.34344:20 689.56714:505	5682.98	5580.85	4610.64	4582.98	5763.83	4603.57	5564.29	5150	5644.64	5916.07	5242	4627	4463	4991	4402	5243.94	5375.89
692	12.117	690.539	690.53949_12.117	PC O-30:1|PC O-16:1_14:0	[M+H]+	similar chromatogram in higher mz_806; adduct linked to 764_[M+Na]+; similar chromatogram in higher mz_835	1	True	8.95	690.543	C38H76NO7P	EtherPC	IBNHQPBEYCSFGY-UHFFFAOYSA-N	O=C(OC(COCCCCCCCCC=CCCCCCC)COP(=O)([O-])OCC[N+](C)(C)C)CCCCCCCCCCCCC	410	True	True	True		False	False	null	null	100	99.9	81.3	80.3	100	368.4	Lipidomics_pos_BL_01	690.54187:12608 691.54522:6042 692.54858:1900	104.10584:39 184.07277:2223 450.29626:39 480.34879:48 690.54236:1220	35529.8	38823.4	36529.8	40731.9	36619.1	22514.3	23828.6	21394.6	23883.9	25400	34360	31858	33864	31307	31909	37647.2	23404.4
693	16.293	690.603	690.60278_16.293	w/o MS2:Cer 13:1;3O/30:3;(2OH)	[M+H]+		0.2	False	11.01	690.603	C43H79NO5	Cer_AP	ODLJZXUNTXZQNV-UHFFFAOYSA-N	O=C(NC(CO)C(O)C(O)CCCC=CCCCC)C(O)CCCCCCCCCCCCCC=CCC=CCC=CCCCCCCC	530	True	True	False		False	False	null	null	100	99.9	null	null	null	29.51	Lipidomics_pos_CON_05	690.60278:1589 691.60613:426 692.60949:102		2059.57	1882.98	1759.57	1908.51	2031.91	1558.93	1566.07	1682.14	1891.07	2200	1957	1521	1531	1575	1589	1928.59	1779.44
694	18.414	690.617	690.61688_18.414	CE 20:4	[M+NH4]+	ion correlated with 99; similar chromatogram in higher mz_763	1	True	14.37	690.618	C47H76O2	CE	HZUAPDDXDDVFOX-UHFFFAOYSA-N	O=C(OC1CC2=CCC3C(CCC4(C)C(CCC34)C(C)CCCC(C)C)C2(C)CC1)CCCCCCC=CCC=CCC=CCC=CCC	410	True	True	True		False	False	null	null	100	99.9	84.7	81.5	100	274.8	Lipidomics_pos_AH_01	690.61493:8159 691.61828:5837 692.62164:1375	125.13217:37 151.14853:85 184.07526:88 217.19429:75 219.21182:85 369.35159:4181 673.69:38 690.62207:306	17359.6	21238.3	13344.7	21666	20000	13173.2	14842.9	16139.3	17392.9	18907.1	21528	22811	22022	24211	24497	18721.3	16091.2
695	16.083	691.527	691.52661_16.083	DG 40:6	[M+Na]+	ion correlated with 631	0.6	True	11.67	691.527	C43H72O5	DG	KRIRZDZAXJIBOI-UHFFFAOYSA-N	O=C(OCC(OC(=O)CCCCCCCCCCCCC=CCC=CCC=CCC=CCC=CCC=CCC)CO)CCCCCCC	420	True	True	True		False	False	null	null	100	99.9	75	75	100	29.94	Lipidomics_pos_CON_05	691.5271:1651 692.53045:775 693.53381:337	576.49994:23 691.52698:2646	2655.32	5368.09	2806.38	6080.85	3912.77	2517.86	2955.36	2735.71	2321.43	2846.43	1522	1757	1383	1363	1651	4164.39	2675.13
696	12.943	692.521	692.52075_12.943	PE 32:0	[M+H]+		0.733	True	9.57	692.523	C37H74NO8P	PE	SLKDGVPOSSLUAI-UHFFFAOYSA-N	O=C(OCC(OC(=O)CCCCCCCCCCCCCCC)COP(=O)(O)OCCN)CCCCCCCCCCCCCCC	420	True	True	True		False	False	null	null	95.8	99.9	70	69.8	100	50.92	Lipidomics_pos_CON_01	692.52356:1509 693.52691:646 694.53027:434	109.10003:96 393.23672:66 551.50244:3009 692.49518:625	2780.85	2676.6	2308.51	2576.6	2859.57	7417.86	7605.36	6941.07	7962.5	7383.93	1509	1918	1595	1613	1796	2640.53	7462.05
697	10.981	692.521	692.52136_10.981	PC 29:0	[M+H]+		1	True	8.55	692.523	C37H74NO8P	PC	JERIBPHBOOFETI-UHFFFAOYSA-N	O=C(OCC(OC(=O)CCCCCCCCCCCCCC)COP(=O)([O-])OCC[N+](C)(C)C)CCCCCCCCCCCCC	420	True	True	True		False	False	null	null	91.5	100	81.4	67.1	100	213.62	Lipidomics_pos_BL_01	692.52161:8744 693.52496:3896 694.52832:1463	184.07298:10091 482.32083:38 692.51996:10050	13734	13485.1	12776.6	14517	14519.1	15614.3	17637.5	17160.7	18116.1	19996.4	21734	19485	19884	19807	20087	13805.9	17705
698	12.306	692.557	692.55725_12.306	PC O-30:0|PC O-16:0_14:0	[M+H]+	similar chromatogram in higher mz_1967; adduct linked to 771_[M+Na]+	1	True	9.4	692.559	C38H78NO7P	EtherPC	WYKBXGAXGHENAM-UHFFFAOYSA-N	O=C(OC(COCCCCCCCCCCCCCCCC)COP(=O)([O-])OCC[N+](C)(C)C)CCCCCCCCCCCCC	410	True	True	True		False	False	null	null	100	100	88	49.1	100	504.76	Lipidomics_pos_CON_05	692.55774:44099 693.56109:19949 694.56445:4297	184.07292:8331 482.35867:39 690.26447:28	28427.7	30002.1	25876.6	30461.7	27717	37442.9	41946.4	40046.4	40183.9	45050	48497	44122	45422	44246	44099	28497	40934.4
699	18.701	692.632	692.63214_18.701	CE 20:3	[M+NH4]+	adduct linked to 711_[M+Na]+	1	True	14.58	692.634	C47H78O2	CE	ARRNWLFGLUXSFU-UHFFFAOYSA-N	O=C(OC1CC2=CCC3C(CCC4(C)C(CCC34)C(C)CCCC(C)C)C2(C)CC1)CCCCCCCCCC=CCC=CCC=CCC	410	True	True	True		False	False	null	null	100	99.9	87.1	81.4	100	92.54	Lipidomics_pos_BL_05	692.63165:1901 693.635:1186 694.63836:343	139.15063:25 165.16371:33 193.1953:46 215.17839:73 226.94977:23 243.19138:22 257.22589:48 287.26141:21 369.34995:5263 556.88306:14 692.43707:44 692.63428:371	9706.38	11636.2	6825.53	10421.3	9138.3	2900	3148.21	3105.36	3244.64	3394.64	7935	7984	7395	7405	8501	9544.89	3158.39
700	15.586	692.664	692.66449_15.586	Cer 44:1;4O|Cer 18:1;3O/26:0;(2OH)	[M+H-H2O]+		1	True	13.19	692.655	C44H87NO5	Cer_AP	KRLRTEPRANCGSV-UHFFFAOYSA-N	O=C(NC(CO)C(O)C(O)CCCC=CCCCCCCCCC)C(O)CCCCCCCCCCCCCCCCCCCCCCCC	410	True	True	True		False	False	null	null	100	100	64.2	67.3	100	31.4	Lipidomics_pos_BL_02	692.66187:1545 693.66522:980 694.66858:267	156.11163:11 247.24117:23 252.267:40 263.23444:47 280.23709:13 298.27328:20 341.30594:53 440.41202:8 577.47552:10 612.60437:90 648.56177:22 657.57654:46 674.64392:90 692.65503:637	2710.64	3217.02	2731.91	3568.09	3297.87	2042.86	2758.93	2455.36	2587.5	2750	1765	1979	1792	1798	1773	3104.79	2518.86
701	8.711	694.501	694.50146_8.711	w/o MS2:SL 12:1;O/28:4;O	[M+H]+		0.067	True	8.63	694.508	C40H71NO6S	SL	VOJHIMJRSJKCHE-UHFFFAOYSA-N	O=C(N(CC(O)C=CCCCCCCC)CS(=O)(=O)O)C(O)CCCCCCCCCCCCCC=CCC=CCC=CCC=CCC	530	True	True	False		False	False	null	null	91	100	null	null	null	19.6	Lipidomics_pos_BL_05	694.50146:1411 695.50481:670 696.50817:195	125.00181:27 694.50018:2318	295.745	293.617	300	289.362	253.191	1891.07	2141.07	1969.64	2119.64	2519.64	558	578	623	516	621	286.569	2128.17
702	19.117	694.648	694.64795_19.117	CE 20:2	[M+NH4]+	similar chromatogram in higher mz_2176	0.467	True	14.84	694.65	C47H80O2	CE	REFJKOQDWJELKE-UHFFFAOYSA-N	O=C(OC1CC2=CCC3C(CCC4(C)C(CCC34)C(C)CCCC(C)C)C2(C)CC1)CCCCCCCCCC=CCC=CCCCCC	410	True	True	True		False	False	null	null	100	99.9	82.5	80.7	100	59.97	Lipidomics_pos_CON_01	694.64795:3342 695.6513:1987 696.65466:631	81.06876:25 135.11729:55 243.21283:71 369.35205:4225 694.35876:96 694.6507:215	2497.87	3142.55	2087.23	2825.53	2521.28	667.857	526.786	717.857	514.286	700	3342	2510	3195	2876	3222	2615.11	625.067
703	16.284	694.681	694.68085_16.284	Unknown	[M+H]+	ion correlated with 649; ion correlated with 1685	0.267	True	null	null	null	null	null	null	999	False	False	False		False	False	null	null	null	null	null	null	null	36.04	Lipidomics_pos_CON_01	694.68085:1251 695.6842:761 696.68756:184	264.26913:520 602.62842:86 614.61603:182 694.646:171	1289.36	1521.28	1114.89	1387.23	1370.21	1055.36	1135.71	1075	1233.93	1328.57	1251	1053	1041	1113	1127	1336.44	1165.74
704	4.334	695.392	695.39178_4.334	Unknown	[M+H]+	ion correlated with 640	0.2	True	null	null	null	null	null	null	999	False	False	False		False	False	null	null	null	null	null	null	null	47.38	Lipidomics_pos_BL_03	695.39252:1307 696.39587:797 697.39923:245	184.07968:25 695.39093:3079 695.42743:26 695.48944:28	1427.66	765.957	827.66	1268.09	1072.34	948.214	1007.14	2333.93	3914.29	2428.57	473	284	395	552	466	1072.26	2126.32
705	18.417	695.572	695.5719_18.417	DG 40:4	[M+Na]+		1	True	12.9	695.558	C43H76O5	DG	VKHXVQHJSQUHDB-UHFFFAOYSA-N	O=C(OCC(OC(=O)CCCCCCCCCCCCCCCCCCC=CCC=CCC=CCC=CCC)CO)CCCCCCC	420	True	True	True		False	False	null	null	94.9	99.8	75	75	100	47.25	Lipidomics_pos_AH_03	695.57056:1005 696.57391:510 697.57727:246	695.57043:2056	2610.64	2744.68	2138.3	2882.98	2210.64	2910.71	2878.57	2551.79	2573.21	3321.43	4179	3618	3982	3770	3779	2517.66	2846.76
706	11.441	696.494	696.4939_11.441	PE O-34:5	[M+H]+		0.333	True	9	696.496	C39H70NO7P	EtherPE	JFCWDSVCBUBNNJ-UHFFFAOYSA-N	O=C(OC(COC=CCCCCCCCCCCCC)COP(=O)(O)OCCN)CCCCCCC=CCC=CCC=CCC=CCC	420	True	True	True		False	False	null	null	82.5	100	48.1	23.6	100	23.16	Lipidomics_pos_CON_04	696.49579:1282 697.49914:787 698.5025:224	89.06067:54 105.06734:20 187.14595:35 203.17854:101 309.24374:28 336.2294:432 555.42743:14 696.3374:38 696.4942:1344	1440.43	1495.74	1004.26	1459.57	1368.09	1112.5	1242.86	1110.71	1171.43	1217.86	1397	1289	1421	1282	1180	1353.32	1170.89
707	16.117	696.613	696.61292_16.117	TG 39:1|TG 10:0_10:0_19:1	[M+NH4]+	ion correlated with 788	0.133	True	13.25	696.614	C42H78O6	TG	OOHLCPVNNLYISR-UHFFFAOYSA-N	O=C(OCC(OC(=O)CCCCCCCCC)COC(=O)CCCCCCCCC)CCCCCCCC=CCCCCCCCCC	410	True	True	True		False	False	null	null	100	100	17.6	77.8	100	31.32	Lipidomics_pos_AH_02	696.61292:1471 697.61627:762 698.61963:423	135.11313:17 383.31445:54 409.32996:208 425.35971:140 507.43985:84 563.50281:297 679.58252:30	1263.83	3129.79	1534.04	3561.7	2400	1169.64	1417.86	1350	1082.14	1423.21	718	913	727	606	767	2378.03	1288.71
708	19.499	696.663	696.66339_19.499	CE 20:1	[M+NH4]+	ion correlated with 819	0.067	True	15.14	696.665	C47H82O2	CE	OWTYWMJVQZQWFH-UHFFFAOYSA-N	O=C(OC1CC2=CCC3C(CCC4(C)C(CCC34)C(C)CCCC(C)C)C2(C)CC1)CCCCCCCCCC=CCCCCCCCC	410	True	True	True		False	False	null	null	100	99.9	81.1	80.4	100	30.15	Lipidomics_pos_CON_05	696.66339:1312 697.66674:875 698.6701:262	109.10051:22 125.13185:15 127.14729:24 135.11681:70 203.1795:36 221.2253:26 241.19615:31 257.21796:14 287.27155:22 369.35114:2432 397.29398:10 661.61664:21 696.43915:52 696.66431:111	597.872	757.447	506.383	838.298	636.17	321.429	435.714	375	348.214	494.643	747	906	964	956	1312	667.447	394.844
709	1.491	697.478	697.47827_1.491	w/o MS2:DG 41:10	[M+H]+		0.333	True	9.44	697.48	C44H66O5	DG	DWPNOQSRJMVMLH-UHFFFAOYSA-N	O=C(OCC(OC(=O)CCCC=CCC=CCC=CCC=CCC=CCC=CCC=CCC)CO)CCCCC=CCC=CCC=CCC	530	True	True	False		False	False	null	null	99	99.7	null	null	null	96.33	Lipidomics_pos_AH_04	697.47827:5133 698.48162:2881 699.48498:916	95.08523:29 159.11395:26 175.14758:70 183.11766:67 199.14684:140 283.20328:17 287.20108:17 309.25641:39 365.18945:54 509.36145:198 697.42267:53	8523.4	10000	8757.45	10921.3	9640.43	0	0	0	0	0	0	0	0	0	0	9568.46	0
710	10.365	697.525	697.52527_10.365	w/o MS2:SM 32:1;2O	[M+Na]+	adduct linked to 644_[M+H]+	1	True	8.43	697.526	C37H75N2O6P	SM	WVZYDPLIGWKWEU-UHFFFAOYSA-N	O=C(NC(COP(=O)([O-])OCC[N+](C)(C)C)C(O)C=CCCCCCCC)CCCCCCCCCCCCCCCCCCC	530	True	True	False		False	False	null	null	100	100	null	null	null	98.25	Lipidomics_pos_CON_03	697.52527:9164 698.52862:3455 699.53198:743	492.47867:34 638.45074:466	6514.89	6802.13	5395.74	7282.98	6619.15	4741.07	4896.43	4546.43	5260.71	5539.29	8654	7827	9164	9010	8846	6523.11	4996.52
711	18.682	697.587	697.58661_18.682	DG 40:3	[M+Na]+	adduct linked to 699_[M+NH4]+	0.333	True	13.03	697.574	C43H78O5	DG	VEJHSTCPXXWBDB-UHFFFAOYSA-N	O=C(OCC(OC(=O)CCCCCCCCCCCCCCCCC=CCC=CCC=CCCCCCCC)CO)CCCCCCC	420	True	True	True		False	False	null	null	91.8	99.8	71.6	75	100	44.39	Lipidomics_pos_CON_01	697.58783:1680 698.59118:1121 699.59454:425	311.30182:26 697.53528:247	1338.3	1427.66	1002.13	1551.06	1397.87	646.429	723.214	710.714	708.929	785.714	1680	1818	1802	1938	1812	1343.46	714.71
712	11.83	698.555	698.55493_11.83	HexCer 34:2;2O|HexCer 18:1;2O/16:1	[M+H]+	ion correlated with 1442; found in higher mz's MsMs_783	0.933	True	9.01	698.557	C40H75NO8	HexCer_NS	YRNLHUQENKOSRP-UHFFFAOYSA-N	O=C(NC(COC1OC(CO)C(O)C(O)C1O)C(O)C=CCCCCCCCCCCCCC)CCCCCCCC=CCCCCCC	410	True	True	True		False	False	null	null	96.5	100	68.2	35.2	100	67.95	Lipidomics_pos_BL_02	698.55908:2101 699.56243:660 700.56579:0	252.26756:89 264.26776:722 506.49011:113 518.49103:585 698.513:390	13366	13368.1	12689.4	15225.5	16463.8	3112.5	3751.79	4019.64	3269.64	3419.64	1879	2008	1449	1537	1290	14222.5	3514.64
713	16.657	698.627	698.62732_16.657	TG 39:0|TG 10:0_12:0_17:0	[M+NH4]+	similar chromatogram in higher mz_824	0.533	True	13.44	698.629	C42H80O6	TG	LHWNBJQDKRVCEP-UHFFFAOYSA-N	O=C(OCC(OC(=O)CCCCCCCCCCC)COC(=O)CCCCCCCCCCCCCCCC)CCCCCCCCC	410	True	True	True		False	False	null	null	100	99.9	31.7	48.1	100	30.7	Lipidomics_pos_AH_02	698.62744:2228 699.63079:1248 700.63415:402	71.08181:13 87.04488:12 197.18851:13 383.31552:24 411.34595:383 425.36151:659 439.37671:585 481.42456:218 495.44263:24 509.45663:299 523.4729:68 551.51398:65 565.51929:249 698.62836:1399	2408.51	4740.43	2151.06	5329.79	3340.43	2117.86	2330.36	2194.64	1926.79	2428.57	1369	1456	1212	1214	1313	3594.34	2199.89
714	16.216	698.641	698.64081_16.216	w/o MS2:Cer 12:2;2O/32:0	[M+Na]+	ion correlated with 774; ion correlated with 601; adduct linked to 601_[M+H-H2O]+	0.067	True	13.31	698.642	C44H85NO3	Cer_NS	AKJRWVVMVVSVHS-UHFFFAOYSA-N	O=C(NC(CO)C(O)C=CCCC=CCCC)CCCCCCCCCCCCCCCCCCCCCCCCCCCCCCC	530	True	True	False		False	False	null	null	77	100	null	null	null	23.6	Lipidomics_pos_CON_01	698.64081:1191 699.64416:627 700.64752:292	399.33514:15 481.4213:34 680.64246:27 698.63989:2520	838.298	940.426	727.66	974.468	855.319	764.286	862.5	907.143	807.143	948.214	1191	1080	1088	991	1224	867.287	857.634
715	13.937	699.395	699.39514_13.937	Unknown	[M+H]+		0.067	True	null	null	null	null	null	null	999	False	False	False		False	False	null	null	null	null	null	null	null	29.64	Lipidomics_pos_CON_01	699.39514:1114 700.39849:411 701.40185:617	524.47345:100	693.617	474.468	838.298	614.894	531.915	757.143	914.286	717.857	660.714	1051.79	1114	404	916	526	510	630.878	820.558
716	16.322	699.596	699.59552_16.322	DG 40:2	[M+Na]+		0.333	True	13.35	699.59	C43H80O5	DG	XTJSTVBHURXVFG-UHFFFAOYSA-N	O=C(OCC(OC(=O)CCCCCCCCCCCCCCCCCCCC=CCC=CCCCCCCC)CO)CCCCCCC	420	True	True	True		False	False	null	null	100	100	73.8	75	100	21.38	Lipidomics_pos_CON_01	699.59369:1488 700.59704:814 701.6004:212	97.10139:112 181.19624:90 699.59845:2403	2687.23	2978.72	2731.91	2908.51	3236.17	2325	2300	2525	2242.86	2862.5	1488	1341	1213	1371	1619	2908.3	2450.96
717	10.35	700.487	700.48749_10.35	PC 28:0	[M+Na]+	ion correlated with 779; adduct linked to 655_[M+H]+	0.667	True	8.23	700.489	C36H72NO8P	PC	UZYIYFQCKVTLDF-UHFFFAOYSA-N	O=C(OCC(OC(=O)CCCCC)COP(=O)([O-])OCC[N+](C)(C)C)CCCCCCCCCCCCCCCCCCCCC	420	True	True	True		False	False	null	null	100	100	84.3	76.2	100	55.27	Lipidomics_pos_BL_02	700.4895:2216 701.49285:1160 702.49621:530	117.09143:17 146.98125:312 495.39276:18 517.42389:237 641.41364:558 700.49762:4351	1706.38	1800	1363.83	1968.09	1638.3	3703.57	3957.14	3585.71	4148.21	4753.57	6230	5560	6234	5755	5977	1695.24	4029.89
718	12.756	700.526	700.52649_12.756	PE P-34:2|PE P-16:0_18:2	[M+H]+	ion correlated with 1140; ion correlated with 1126	1	True	9.8	700.528	C39H74NO7P	EtherPE	LJVXDBWIBQQKFU-UHFFFAOYSA-N	O=C(OC(COC=CCCCCCCCCCCCCCC)COP(=O)(O)OCCN)CCCCCCCC=CCC=CCCCCC	410	True	True	True		False	False	null	null	100	100	43.4	45.1	100	90.08	Lipidomics_pos_BL_02	700.52618:4434 701.52953:1740 702.53289:705	81.06307:18 93.06851:27 113.0979:8 131.08891:14 151.14938:11 245.22543:25 266.28357:99 306.27704:46 337.22821:30 337.34564:25 364.26047:1758 388.23428:9 388.25931:96 420.28751:13 455.33185:9 528.52332:11 541.50385:30 559.50775:721 682.52301:75 700.52625:2863	8778.72	6706.38	8012.77	8557.45	8021.28	7794.64	7917.86	6517.86	8528.57	9339.29	11822	13055	11740	11462	12068	8015.24	8019.89
719	5.671	700.557	700.55695_5.671	w/o MS2:SL 12:1;O/28:1;O	[M+H]+		1	True	10.56	700.554	C40H77NO6S	SL	HQCPMWVDBGIAFI-UHFFFAOYSA-N	O=C(N(CC(O)C=CCCCCCCC)CS(=O)(=O)O)C(O)CCCCCCCCCCCCCCC=CCCCCCCCCCC	530	True	True	False		False	False	null	null	98.3	99.9	null	null	null	200.67	Lipidomics_pos_CON_02	700.55695:31756 701.5603:16082 702.56366:3469	85.1018:68 145.12225:188 627.46014:18 683.53497:124	38025.5	35021.3	30338.3	27793.6	17744.7	26641.1	39505.4	20530.4	19900	15946.4	17190	31756	13022	10517	12437	29785.3	24504.6
720	12.124	700.57	700.57019_12.124	HexCer 34:1;2O	[M+H]+		1	True	9.21	700.572	C40H77NO8	HexCer_NS	VJLLLMIZEJJZTE-UHFFFAOYSA-N	O=C(NC(COC1OC(CO)C(O)C(O)C1O)C(O)C=CCCCCCCCCCCCCC)CCCCCCCCCCCCCCC	420	True	True	True		False	False	null	null	87.8	100	96.7	68.3	83.3	89.63	Lipidomics_pos_AH_04	700.56982:4686 701.57317:1760 702.57653:644	264.26727:716 520.47217:68 682.55585:592	8417.02	10387.2	7787.23	9970.21	8487.23	12360.7	12944.6	13867.9	14355.4	11871.4	8727	7718	6651	7710	7245	9009.68	13080.4
721	13.397	701.409	701.40875_13.397	Unknown	[M+H]+	ion correlated with 753; found in higher mz's MsMs_2182	1	True	null	null	null	null	null	null	999	False	False	False		False	False	null	null	null	null	null	null	null	584.91	Lipidomics_pos_AH_01	701.40814:45980 702.41149:24728 703.41485:9129	699.09009:55 701.35071:187 701.40698:12410 701.47937:181	97829.8	84121.3	78957.4	77614.9	87134	75546.4	76285.7	102848	95314.3	98146.4	25523	19957	21077	23546	24035	85131.4	89628
722	14.654	701.41	701.41016_14.654	Unknown	[M+H]+		0.067	True	null	null	null	null	null	null	999	False	False	False		False	False	null	null	null	null	null	null	null	14.03	Lipidomics_pos_CON_01	701.41016:1899 702.41351:700 703.41687:227	538.5025:52 633.51526:35	2029.79	2431.91	2265.96	2036.17	2280.85	2239.29	2057.14	2521.43	2207.14	1976.79	1899	1426	1468	1443	1280	2208.59	2199.91
723	15.265	701.51	701.51013_15.265	DG 41:8	[M+Na]+	ion correlated with 661	0.667	True	10.83	701.511	C44H70O5	DG	ZAXZRFHWBVSFKW-UHFFFAOYSA-N	O=C(OCC(OC(=O)CCCCCCC=CCC=CCC=CCC=CCC=CCC=CCC=CCC=CCC)CO)CCCCCCCC	420	True	True	True		False	False	null	null	100	99.9	75	75	100	20.15	Lipidomics_pos_AH_02	701.51123:2886 702.51458:1815 703.51794:753	497.81186:13 603.52954:14 699.06195:14 701.50842:2454	2297.87	6140.43	2159.57	6976.6	3725.53	2062.5	2682.14	2403.57	1942.86	2005.36	1111	1553	1285	1133	1373	4259.79	2219.55
724	10.515	701.558	701.55811_10.515	SM 34:2;2O|SM 18:2;2O/16:0	[M+H]+	adduct linked to 820_[M+Na]+	1	True	8.49	701.559	C39H77N2O6P	SM	RYPRHPLEPBYJJE-UHFFFAOYSA-N	O=C(NC(COP(=O)([O-])OCC[N+](C)(C)C)C(O)C=CCCC=CCCCCCCCCC)CCCCCCCCCCCCCCC	410	True	True	True		False	False	null	null	100	100	85.6	84.8	100	952.71	Lipidomics_pos_CON_04	701.55841:101938 702.56176:57328 703.56512:12066	184.07336:21362 262.25272:51 624.47705:35 683.513:29 701.55804:8295	85957.4	97248.9	82657.4	102389	82657.4	61078.6	58428.6	58137.5	61180.4	62192.9	103743	96957	106418	101938	94755	90181.8	60203.5
725	10.069	702.506	702.50574_10.069	w/o MS2:PC 15:1_15:1	[M+H]+		0.467	True	8.12	702.507	C38H72NO8P	PC	BQTXNAKXHQSYOW-UHFFFAOYSA-N	O=C(OCC(OC(=O)CCCCCCCC=CCCCCC)COP(=O)([O-])OCC[N+](C)(C)C)CCCCCCCC=CCCCCC	530	True	True	False		False	False	null	null	69.5	100	null	null	null	33.82	Lipidomics_pos_CON_01	702.50574:2761 703.50909:1337 704.51245:313	184.04929:58 449.21149:34 701.55396:21 702.5069:3667	1031.91	1065.96	919.149	1174.47	1040.43	3569.64	3853.57	3596.43	4057.14	4225	2761	2461	2450	2461	2657	1046.44	3860.71
726	11.773	702.542	702.54187_11.773	PE O-34:2	[M+H]+		0.533	True	10.22	702.543	C39H76NO7P	EtherPE	SWGVJQVSFKBEHN-UHFFFAOYSA-N	O=C(OC(COCCCCCCCCCCCCCCCCC)COP(=O)(O)OCCN)CCCCCCCC=CCC=CCCCC	420	True	True	True		False	False	null	null	83.7	100	65.2	21.7	100	21.15	Lipidomics_pos_BL_01	702.54193:1172 703.54528:0 704.54864:0	86.09525:35 282.28281:30 540.52759:25 561.48761:281 685.5661:35 702.53845:1022	5174.47	4351.06	4438.3	5197.87	4606.38	2092.86	2401.79	2203.57	2919.64	2046.43	2336	2070	1897	2132	2530	4753.27	2332.99
727	13.509	702.542	702.54205_13.509	PE O-34:2	[M+H]+	adduct linked to 822_[M+Na]+	1	True	10.49	702.543	C39H76NO7P	EtherPE	NHHCZYWVBRHSSB-UHFFFAOYSA-N	O=C(OC(COC=CCCCCCCCCCCCCCCCC)COP(=O)(O)OCCN)CCCCCCCC=CCCCCCC	420	True	True	True		False	False	null	null	89.3	100	49.6	27.1	100	795.35	Lipidomics_pos_AH_03	702.5426:32024 703.54595:17448 704.54931:3314	93.06931:80 121.10105:85 135.11621:82 247.24194:75 263.23871:21 265.2515:161 279.26709:285 294.31848:25 307.29788:34 308.29346:135 338.16647:23 364.19534:15 383.31683:20 392.29099:354 434.26526:30 455.3472:11 523.48401:15 538.49445:26 543.51288:30 561.52252:1495 653.35181:11 702.37476:45 702.54175:6420	64678.7	72012.8	68136.2	72229.8	68408.5	61119.6	65764.3	60651.8	66187.5	67308.9	102355	104159	100234	98641	98493	69093	64206.1
728	12.058	702.545	702.54468_12.058	w/o MS2:PC O-9:0_22:2	[M+H]+		0.067	False	9.01	702.543	C39H76NO7P	EtherPC	HCVKNLGKGZWFHN-UHFFFAOYSA-N	O=C(OC(COCCCCCCCCC)COP(=O)([O-])OCC[N+](C)(C)C)CCCCCCCCCCCC=CCC=CCCCCC	530	True	True	False		False	False	null	null	98.9	100	null	null	null	16.05	Lipidomics_pos_CON_02	702.54468:1550 703.54803:0 704.55139:0		1934.04	2297.87	1925.53	2382.98	2004.26	600	755.357	710.714	753.571	891.071	850	1550	931	1092	1155	2109.1	742.143
729	12.556	702.585	702.58514_12.556	w/o MS2:HexCer 18:0;2O/16:0	[M+H]+		0.333	True	9.61	702.588	C40H79NO8	HexCer_NDS	BLGKYYVFGMKTEZ-UHFFFAOYSA-N	O=C(NC(COC1OC(CO)C(O)C(O)C1O)C(O)CCCCCCCCCCCCCCC)CCCCCCCCCCCCCCC	530	True	True	False		False	False	null	null	78.5	100	null	null	null	59.72	Lipidomics_pos_BL_03	702.58514:4376 703.58849:2095 704.59185:852	239.23839:13 256.26254:276 266.30743:27 504.51111:74 522.52368:2286 684.57678:100	917.021	410.638	525.532	557.447	704.255	6357.14	6110.71	7814.29	6675	6414.29	538	314	251	327	223	623.431	6674.44
730	15.852	703.526	703.52631_15.852	DG 41:7	[M+Na]+	ion correlated with 666	1	True	11.62	703.527	C44H72O5	DG	CXBKHZFOZCZUNC-UHFFFAOYSA-N	O=C(OCC(OC(=O)CCCCCCCCCC=CCC=CCC=CCC=CCC=CCC=CCC=CCC)CO)CCCCCCCC	420	True	True	True		False	False	null	null	100	99.9	75	75	100	103.17	Lipidomics_pos_BL_01	703.52716:5412 704.53051:2630 705.53387:921	703.37799:22 703.52795:2983	11602.1	32427.7	11936.2	35972.3	21519.1	9664.29	14196.4	13096.4	9401.79	11641.1	6126	8468	6323	5436	6908	22691	11600.1
731	11.633	703.573	703.57288_11.633	SM 34:1;2O|SM 19:0;2O/15:1	[M+H]+	adduct linked to 675_[M+Na]+; similar chromatogram in higher mz_2194	1	True	8.9	703.575	C39H79N2O6P	SM	IOJCBZREJXOCFX-UHFFFAOYSA-N	O=C(NC(COP(=O)([O-])OCC[N+](C)(C)C)C(O)CCCCCCCCCCCCCCCC)CCCCCCCC=CCCCCC	410	True	True	True		False	False	null	null	100	100	85.9	86	100	7958.35	Lipidomics_pos_CON_01	703.57288:925433 704.57623:498794 705.57959:104936	86.09632:2233 184.07321:206163 184.93677:32 185.25658:28 185.81671:33 187.7253:30 189.2355:17 280.26138:43 465.34082:36 604.22491:18 626.49121:146 685.56195:1508 703.57391:74313	828721	939315	834026	929460	860902	563514	604512	605618	602788	627446	925433	895502	846833	890376	837847	878484	600776
732	5.527	704.485	704.48474_5.527	w/o MS2:SL 13:1;O/28:6;O	[M+H]+		0.6	True	8.53	704.492	C41H69NO6S	SL	SBMRIXQMUAREGW-UHFFFAOYSA-N	O=C(N(CC(O)C=CCCCCCCCC)CS(=O)(=O)O)C(O)CCCCCCCC=CCC=CCC=CCC=CCC=CCC=CCC	530	True	True	False		False	False	null	null	88.1	100	null	null	null	18.64	Lipidomics_pos_CON_01	704.48474:2065 705.48809:1268 706.49145:270	125.00047:12 687.4837:12 704.48792:2685	2544.68	3200	2610.64	3670.21	3063.83	1442.86	1266.07	1467.86	1521.43	1580.36	2065	1953	1677	1641	1572	3017.87	1455.83
733	10.921	704.522	704.52173_10.921	w/o MS2:PC 6:0_24:1	[M+H]+		0.267	False	8.37	704.523	C38H74NO8P	PC	KMUBPIAETRSUPE-UHFFFAOYSA-N	O=C(OCC(OC(=O)CCCCCCCCCCCCCC=CCCCCCCCC)COP(=O)([O-])OCC[N+](C)(C)C)CCCCC	530	True	True	False		False	False	null	null	99.7	100	null	null	null	378.07	Lipidomics_pos_CON_01	704.52173:33473 705.52508:16135 706.52844:3112		10029.8	10061.7	10008.5	10827.7	10106.4	19526.8	21280.4	17116.1	18673.2	20408.9	33473	29025	30903	31360	31748	10207	19401.1
734	10.612	704.522	704.52228_10.612	PC 30:1	[M+H]+		1	True	8.38	704.523	C38H74NO8P	PC	XGGMHQYOVYWRLV-UHFFFAOYSA-N	O=C(OCC(OC(=O)CCCCCCCC=CCCCCCC)COP(=O)([O-])OCC[N+](C)(C)C)CCCCCCCCCCCCC	420	True	True	True		False	False	null	null	92.5	100	85.3	70.4	100	564.74	Lipidomics_pos_CON_03	704.52167:79418 705.52502:34736 706.52838:8414	184.07326:13514 468.31134:50 704.521:8442 704.96399:19	33057.4	35387.2	33163.8	36693.6	32187.2	55758.9	59260.7	58214.3	61178.6	61992.9	81931	74634	79418	79171	78135	34098	59281.1
735	12.533	704.524	704.52374_12.533	PE 33:1	[M+H]+	ion correlated with 988	0.2	True	9.42	704.523	C38H74NO8P	PE	IRIWDNSQGGUUBS-UHFFFAOYSA-N	O=C(OCC(OC(=O)CCCCCCCCCCCCCCC=CCCCCCCCCCC)COP(=O)(O)OCCN)CCCCC	420	True	True	True		False	False	null	null	82.5	100	68.5	67.8	75	67.51	Lipidomics_pos_CON_02	704.52454:6112 705.52789:3887 706.53125:1988	478.32516:27 563.49988:240	3438.3	3517.02	3834.04	3610.64	3591.49	3982.14	4323.21	3914.29	4289.29	4955.36	6048	6112	6374	5888	5777	3598.27	4292.79
736	12.49	704.556	704.55573_12.49	w/o MS2:PC O-15:1_16:0	[M+H]+		0.4	True	9.29	704.559	C39H78NO7P	EtherPC	DSHIQGZJZQCLSU-UHFFFAOYSA-N	O=C(OC(COCCCCCCCCC=CCCCCC)COP(=O)([O-])OCC[N+](C)(C)C)CCCCCCCCCCCCCCC	530	True	True	False		False	False	null	null	70.2	100	null	null	null	66.58	Lipidomics_pos_CON_01	704.55573:8357 705.55908:5754 706.56244:1626	466.32217:27 704.55847:1126	9910.64	13268.1	10576.6	11640.4	12055.3	5739.29	7305.36	6828.57	7308.93	6158.93	8357	7974	8158	8122	7882	11490.4	6668.33
737	14.331	704.556	704.55591_14.331	PE O-34:1	[M+H]+	similar chromatogram in higher mz_853	0.333	True	11.17	704.559	C39H78NO7P	EtherPE	HEASGCOZOMIKFU-UHFFFAOYSA-N	O=C(OC(COC=CCCCCCCCCCCCCCCCC)COP(=O)(O)OCCN)CCCCCCCCCCCCCCC	420	True	True	True		False	False	null	null	100	99.9	60.2	60.6	100	25.44	Lipidomics_pos_BL_02	704.55865:1733 705.562:1142 706.56536:245	135.11691:17 285.23889:26 294.31854:73 313.27258:1210 392.25534:53 563.53918:194 704.55554:1277	1104.26	972.34	1093.62	1034.04	1238.3	2742.86	3094.64	2933.93	3083.93	3239.29	653	698	613	665	718	1088.32	3018.91
738	12.612	704.558	704.55829_12.612	PC O-31:1	[M+H]+		0.4	True	9.27	704.559	C39H78NO7P	EtherPC	ZFGFGETTXFCNGE-UHFFFAOYSA-N	O=C(OC(COCCCCCCCC)COP(=O)([O-])OCC[N+](C)(C)C)CCCCCCCCCCC=CCCCCCCCCCC	420	True	True	True		False	False	null	null	91	99.9	72.1	70.3	100	70.96	Lipidomics_pos_BL_03	704.56036:3824 705.56371:3938 706.56707:1562	81.06908:17 166.06406:25 184.07271:5850 265.25116:94 542.53168:33 563.47498:246 687.49811:30 704.5567:6781	11089.4	13268.1	11204.3	10831.9	12055.3	8194.64	7305.36	6828.57	7308.93	7014.29	5178	7974	8158	8122	6513	11689.7	7330.22
739	11.625	704.577	704.57654_11.625	w/o MS2:RIKEN P-VS1 ID-8090 from Mouse_Adipose_WT_N_F1AA	[M+H]+		0.2	True	12.95	704.58		Unknown			530	True	True	False		False	False	null	null	96.9	100	null	null	null	2323.93	Lipidomics_pos_AH_04	704.57654:218827 705.57989:51185 706.58325:0	71.07233:349 86.09614:3724 183.46791:271 185.07671:33119 185.86765:116 186.87996:88 193.8703:17 466.34479:29 623.18494:33 672.55249:18 702.23309:129 703.57074:530 704.57831:63026	407257	469017	397991	465589	419311	274593	284248	285982	302246	310591	460601	433224	404079	416578	418471	431833	291532
740	10.927	705.525	705.52521_10.927	w/o MS2:SL 13:1;O/28:6	[M+H]+		0.067	False	9.45	705.524	C41H69NO5S	SL	JLJGWIWQPYQVOP-UHFFFAOYSA-N	O=C(N(CC(O)C=CCCCCCCCC)CS(=O)(=O)O)CCCCCCCCC=CCC=CCC=CCC=CCC=CCC=CCC	530	True	True	False		False	False	null	null	98.6	100	null	null	null	87.44	Lipidomics_pos_CON_02	705.52521:12186 706.52856:3869 707.53192:562		4068.09	4661.7	3723.4	4987.23	4470.21	7982.14	8235.71	7075	8087.5	9380.36	13849	12186	12224	12984	12361	4382.26	8152.37
741	12.537	705.529	705.52899_12.537	w/o MS2:SL 13:1;O/28:6	[M+H]+		0.067	False	9.45	705.524	C41H69NO5S	SL	JLJGWIWQPYQVOP-UHFFFAOYSA-N	O=C(N(CC(O)C=CCCCCCCCC)CS(=O)(=O)O)CCCCCCCCC=CCC=CCC=CCC=CCC=CCC=CCC	530	True	True	False		False	False	null	null	86	100	null	null	null	29.65	Lipidomics_pos_CON_04	705.52899:2956 706.53234:1714 707.5357:937		1317.02	1389.36	1725.53	1661.7	1753.19	1676.79	2269.64	1801.79	1905.36	2066.07	2845	2995	2796	2956	2622	1569.36	1943.75
742	16.407	705.542	705.54211_16.407	DG 41:6	[M+Na]+	ion correlated with 671	1	True	12.18	705.543	C44H74O5	DG	ZXJVUEJYXDAZTF-UHFFFAOYSA-N	O=C(OCC(OC(=O)CCCCCCCCCCCCC=CCC=CCC=CCC=CCC=CCC=CCC)CO)CCCCCCCC	420	True	True	True		False	False	null	null	100	99.9	75	75	100	129.33	Lipidomics_pos_BL_03	705.54242:10627 706.54577:5029 707.54913:1829	705.54132:898	17480.9	41238.3	18187.2	45127.7	27285.1	14901.8	18685.7	18976.8	14496.4	18653.6	8796	11799	9160	8664	10615	29864.1	17143.2
743	12.601	705.56	705.55951_12.601	w/o MS2:VAE 28:5	[M+H]+		0.133	False	14.17	705.558	C48H74O2	VAE	OZEZGAFVDHEJFR-UHFFFAOYSA-N	O=C(OCC=C(C=CC=C(C=CC1=C(C)CCCC1(C)C)C)C)CCCCCCCCCCCC=CCC=CCC=CCC=CCC=CCC	530	True	True	False		False	False	null	null	99	100	null	null	null	24.07	Lipidomics_pos_AH_02	705.55951:2681 706.56286:2152 707.56622:0		5351.06	5704.26	5542.55	5310.64	5317.02	2250	3525	4533.93	2646.43	4226.79	3091	2767	2762	3463	2357	5445.35	3436.14
744	12.465	705.56	705.55969_12.465	w/o MS2:VAE 28:5	[M+H]+		0.067	False	14.17	705.558	C48H74O2	VAE	OZEZGAFVDHEJFR-UHFFFAOYSA-N	O=C(OCC=C(C=CC=C(C=CC1=C(C)CCCC1(C)C)C)C)CCCCCCCCCCCC=CCC=CCC=CCC=CCC=CCC	530	True	True	False		False	False	null	null	98.7	100	null	null	null	33.8	Lipidomics_pos_CON_02	705.55969:3647 706.56304:1182 707.5664:473		4002.13	4723.4	4017.02	5106.38	4474.47	1600	2303.57	4533.93	2719.64	4226.79	3973	3647	3245	3463	3710	4464.79	3076.58
745	12.128	705.588	705.58844_12.128	SM 34:0;2O	[M+H]+		1	True	9.41	705.591	C39H81N2O6P	SM	JIOJUELCHJZSCJ-UHFFFAOYSA-N	O=C(NC(COP(=O)([O-])OCC[N+](C)(C)C)C(O)CCCCCCCCC)CCCCCCCCCCCCCCCCCCCCC	420	True	True	True		False	False	null	null	100	100	73.6	82.4	100	569.49	Lipidomics_pos_AH_02	705.5885:28863 706.59185:14905 707.59521:3698	86.09724:50 104.10392:135 184.07312:6336 687.56006:57 705.54218:281 705.58881:3153 705.62543:129	51625.5	61410.6	51593.6	61966	59455.3	91087.5	93344.6	96366.1	97671.4	94437.5	66558	60329	55101	57048	57153	57210.2	94581.7
746	10.019	706.537	706.53687_10.019	w/o MS2:NAGlySer 9:0;O(FA 26:4)	[M+H]+	ion correlated with 609	0.2	True	8.56	706.537	C40H68N2O7	NAGlySer	AQMXDZMGSNHPBY-UHFFFAOYSA-N	O=C(OC(CCCC(=O)NCC(=O)NC(C(=O)O)CO)CCCC)CCCCCCCCCCCCC=CCC=CCC=CCC=CCC	530	True	True	False		False	False	null	null	100	100	null	null	null	23.94	Lipidomics_pos_CON_01	706.53687:1633 707.54022:721 708.54358:288	124.99946:22 706.41895:18 706.53864:2062	980.851	982.979	927.66	1027.66	1065.96	833.929	698.214	751.786	721.429	767.857	1633	1519	1492	1484	1465	996.649	754.643
747	11.554	706.537	706.53748_11.554	PC 30:0|PC 14:0_16:0	[M+H]+		1	True	8.93	706.538	C38H76NO8P	PC	RFVFQQWKPSOBED-UHFFFAOYSA-N	O=C(OCC(OC(=O)CCCCCCCCCCCCCCC)COP(=O)([O-])OCC[N+](C)(C)C)CCCCCCCCCCCCC	410	True	True	True		False	False	null	null	100	100	84.6	71.7	100	6043.53	Lipidomics_pos_CON_02	706.53693:586536 707.54028:355634 708.54364:74704	71.07232:117 104.10737:258 166.06277:269 184.07333:116951 185.07639:103 186.07776:94 187.08189:26 258.10672:13 313.27792:24 422.29346:21 450.29593:187 468.31027:160 496.33835:306 704.18591:104 706.53766:80814	290932	319421	284904	327536	288698	636420	707662	654545	684920	739282	624608	586536	597355	579609	564391	302299	684566
748	12.804	706.573	706.57336_12.804	PC O-31:0|PC O-15:0_16:0	[M+H]+		1	True	9.89	706.575	C39H80NO7P	EtherPC	RPJBSPVVDIKMBV-UHFFFAOYSA-N	O=C(OC(COCCCCCCCCCCCCCCC)COP(=O)([O-])OCC[N+](C)(C)C)CCCCCCCCCCCCCCC	410	True	True	True		False	False	null	null	100	100	72.5	72.1	100	85.24	Lipidomics_pos_BL_02	706.57373:5971 707.57708:2808 708.58044:868	184.0554:25 184.07275:756 468.34174:27 706.46588:28 706.52557:174 706.54425:199 706.57513:529	8534.04	9463.83	9395.74	8636.17	9372.34	10641.1	10662.5	9610.71	9480.36	11739.3	6372	6524	5376	7436	5990	9080.37	10426.9
749	11.734	706.58	706.57971_11.734	PC O-31:0|PC O-17:0_14:0	[M+H]+		0.667	True	9.92	706.575	C39H80NO7P	EtherPC	YENHEPQSRYGUGE-UHFFFAOYSA-N	O=C(OC(COCCCCCCCCCCCCCCCCC)COP(=O)([O-])OCC[N+](C)(C)C)CCCCCCCCCCCCC	410	True	True	True		False	False	null	null	100	100	69.7	67.8	100	87.44	Lipidomics_pos_AH_01	706.58044:3700 707.58379:515 708.58715:0	98.98361:105 104.10709:343 184.07945:52871 185.07652:3406 187.08011:335 450.26135:48 450.29446:134 496.33755:194 523.46149:132 704.24011:151 706.54114:83418	7872.34	9780.85	8138.3	8353.19	6976.6	2405.36	1566.07	2769.64	1903.57	2600	5282	4672	3331	4224	4548	8224.12	2249.22
750	15.326	706.597	706.59729_15.326	w/o MS2:TG 8:0_14:1_18:2	[M+H]+	ion correlated with 832	0.067	True	12.64	706.598	C43H76O6	TG	ZVKKBGWIUYELOX-UHFFFAOYSA-N	O=C(OCC(OC(=O)CCCCCCCC=CCCCC)COC(=O)CCCCCCCC=CCC=CCCCCC)CCCCCCC	530	True	True	False		False	False	null	null	67.5	100	null	null	null	26.04	Lipidomics_pos_AH_04	706.59729:1618 707.60064:937 708.604:445	81.0692:13 109.1003:25 175.14856:5 203.17908:7 239.23596:20 247.24132:17 283.25925:10 381.30069:6 405.30234:14 409.33099:479 433.33167:90 461.34967:11 461.36288:17 573.43536:19 601.45343:18 657.55145:6 689.57153:125 706.28027:9 706.59412:986	961.702	2885.11	1106.38	3442.55	1919.15	857.143	1105.36	1130.36	800	1023.21	672	731	547	513	751	2062.77	982.946
751	13.397	707.489	707.48895_13.397	Unknown	[M+H]+		1	True	null	null	null	null	null	null	999	False	False	False		False	False	null	null	null	null	null	null	null	237.06	Lipidomics_pos_BL_01	707.49054:18800 708.49389:0 709.49725:0	566.51672:203 607.38806:197 707.48816:10163	39885.1	31080.9	31685.1	30966	33427.7	33571.4	31858.9	50742.9	53814.3	47771.4	8921	6210	5942	7242	7404	33409	43551.6
752	12.808	707.578	707.57788_12.808	w/o MS2:RIKEN P-VS1 ID-8178 from Mouse_Feces_WT_N_Ctr	[M+H]+		0.067	False	11	707.576		Unknown			530	True	True	False		False	False	null	null	98.9	100	null	null	null	47.09	Lipidomics_pos_AH_05	707.57788:1935 708.58123:0 709.58459:0		4110.64	4610.64	3214.89	3374.47	4117.02	4464.29	4351.79	4326.79	4841.07	4594.64	3666	2224	3279	2580	3116	3885.53	4515.62
753	13.402	708.508	708.50763_13.402	w/o MS2:HexCer 16:1;3O/18:3;(2OH)	[M+H]+	ion correlated with 721; found in higher mz's MsMs_2182	1	True	8.05	708.505	C40H71NO10	HexCer_AP	OTDHYECDELHYRK-UHFFFAOYSA-N	O=C(NC(COC1OC(CO)C(O)C(O)C1O)C(O)C(O)CCCC=CCCCCCCC)C(O)CCCCCCC=CCC=CCC=CCC	530	True	True	False		False	False	null	null	97.6	99.9	null	null	null	498.05	Lipidomics_pos_BL_05	708.50763:69811 709.51098:31812 710.51434:7002	551.32788:2613 661.27863:55 708.45587:202	110228	87183	83768.1	99661.7	116983	68442.9	76516.1	111866	124287	124662	17537	12488	13691	16073	16980	99564.8	101155
754	10.9	708.551	708.55139_10.9	w/o MS2:NAGlySer 9:0;O(FA 26:3)	[M+H]+		0.067	True	8.96	708.552	C40H70N2O7	NAGlySer	UBUPEZNXPQNERZ-UHFFFAOYSA-N	O=C(OC(CCCC(=O)NCC(=O)NC(C(=O)O)CO)CCCC)CCCCCCCCCCC=CCC=CCC=CCCCCCCC	530	True	True	False		False	False	null	null	99.9	100	null	null	null	17.53	Lipidomics_pos_CON_04	708.55139:1265 709.55474:454 710.5581:247	104.10857:17 708.4447:49	1548.94	1885.11	1802.13	1880.85	1551.06	1939.29	2125	2044.64	1908.93	2175	1315	1174	1048	1265	1181	1733.94	2038.57
755	15.879	708.612	708.61188_15.879	TG 40:2|TG 8:0_16:1_16:1	[M+NH4]+	ion correlated with 842; adduct linked to 770_[M+Na]+; similar chromatogram in higher mz_842; similar chromatogram in higher mz_1878	1	True	13.18	708.614	C43H78O6	TG	CTNKKFVFNBQALU-UHFFFAOYSA-N	O=C(OCC(OC(=O)CCCCCCCC=CCCCCCC)COC(=O)CCCCCCCC=CCCCCCC)CCCCCCC	410	True	True	True		False	False	null	null	100	100	28.1	35.5	100	34.08	Lipidomics_pos_AH_02	708.6123:5749 709.61565:3757 710.61901:2881	71.0502:43 177.16055:25 257.20886:10 378.89832:11 437.36237:223 463.37628:42 465.39319:66 495.26477:50 547.47223:157 551.32452:77 663.45087:336 708.6087:1337	3606.38	12231.9	4197.87	14063.8	6936.17	3496.43	4551.79	4223.21	3260.71	4078.57	2264	3097	2196	1985	2475	8207.42	3922.28
756	17.097	709.514	709.5144_17.097	w/o MS2:RIKEN P-VS1 ID-8225 from Mouse_Feces_WT_N_Ctr	[M+H]+		0.067	True	10.04	709.521		Unknown			530	True	True	False		False	False	null	null	71.9	99.8	null	null	null	14.3	Lipidomics_pos_CON_02	709.5144:1340 710.51775:594 711.52111:371	508.36749:38 537.36731:56 553.36957:14 608.39087:49 663.51123:59 707.44952:68 709.51385:1144	1708.51	1919.15	1610.64	1551.06	1521.28	2148.21	2146.43	1839.29	1723.21	1910.71	1018	1340	1024	1033	1151	1662.07	1952.97
757	17.987	709.53	709.53033_17.987	w/o MS2:RIKEN P-VS1 ID-8225 from Mouse_Feces_WT_N_Ctr	[M+H]+		0.333	True	10.04	709.521		Unknown			530	True	True	False		False	False	null	null	73.6	99.7	null	null	null	21.99	Lipidomics_pos_CON_01	709.53033:1596 710.53368:889 711.53704:417	410.32697:27 709.53064:2919	1138.3	1229.79	1159.57	1285.11	1336.17	1191.07	1087.5	1158.93	1069.64	1251.79	1596	1292	1505	1531	1485	1229.68	1151.92
758	11.979	710.508	710.50787_11.979	PE P-35:4|PE P-15:0_20:4	[M+H]+		0.733	True	9.4	710.512	C40H72NO7P	EtherPE	ZPZOLGIFBSLYPT-UHFFFAOYSA-N	O=C(OC(COC=CCCCCCCCCCCCCC)COP(=O)(O)OCCN)CCCCCCC=CCC=CCC=CCC=CCC	410	True	True	True		False	False	null	null	100	100	83.6	84.2	100	37.91	Lipidomics_pos_AH_05	710.5127:1314 711.51605:797 712.51941:718	71.08586:42 83.08447:48 137.13039:34 203.17815:48 269.22247:70 350.21756:80 361.27292:1246 484.28577:28 569.49243:190 710.4726:155	4072.34	3525.53	3148.94	3829.79	2795.74	1841.07	1821.43	1689.29	2255.36	1910.71	2684	2238	2243	2264	2337	3474.34	1903.79
759	15.858	710.627	710.62653_15.858	w/o MS2:TG 8:0_8:0_24:1	[M+H]+		0.067	True	13.38	710.629	C43H80O6	TG	IZQWVVKUHOZISH-UHFFFAOYSA-N	O=C(OCC(OC(=O)CCCCCCC)COC(=O)CCCCCCCCCCCC=CCCCCCCCCCC)CCCCCCC	530	True	True	False		False	False	null	null	62.7	100	null	null	null	32.21	Lipidomics_pos_AH_05	710.62653:1917 711.62988:917 712.63324:375	265.24884:17 410.33331:149 548.46906:18 693.60297:21 710.62683:1059	1863.83	6029.79	2093.62	6744.68	4078.72	1533.93	1946.43	2135.71	1514.29	2173.21	928	1094	820	695	956	4161.81	1860.62
760	16.428	710.628	710.62817_16.428	TG 40:1|TG 8:0_14:0_18:1	[M+NH4]+	ion correlated with 855; adduct linked to 778_[M+Na]+; similar chromatogram in higher mz_1494; similar chromatogram in higher mz_855	1	True	13.36	710.629	C43H80O6	TG	KOGATJWDNKHOGW-UHFFFAOYSA-N	O=C(OCC(OC(=O)CCCCCCCCCCCCC)COC(=O)CCCCCCCC=CCCCCCCCC)CCCCCCC	410	True	True	True		False	False	null	null	100	100	56.2	85.1	100	124.79	Lipidomics_pos_CON_01	710.6286:5443 711.63195:3094 712.63531:1184	95.08473:51 183.17471:44 411.31232:103 437.36176:668 465.36566:33 465.39215:312 549.48706:538 693.61896:28	8842.55	30442.6	9765.96	33721.3	17268.1	8126.79	9983.93	10957.1	7676.79	10187.5	5443	6868	4872	4564	5973	20008	9386.54
761	15.161	711.531	711.53082_15.161	w/o MS2:SL 12:1;O/28:4;O	[M+H]+		0.067	True	8.63	711.534	C40H71NO6S	SL	VOJHIMJRSJKCHE-UHFFFAOYSA-N	O=C(N(CC(O)C=CCCCCCCC)CS(=O)(=O)O)C(O)CCCCCCCCCCCCCC=CCC=CCC=CCC=CCC	530	True	True	False		False	False	null	null	97.5	99.8	null	null	null	15.98	Lipidomics_pos_CON_04	711.53082:1243 712.53417:654 713.53753:263	711.44598:20	1236.17	1136.17	1161.7	1485.11	1336.17	862.5	1025	1096.43	1076.79	1312.5	987	706	643	1243	1038	1271.14	1074.33
762	11.034	711.54	711.53998_11.034	w/o MS2:SM 13:1;2O/22:3	[M+Na]+	adduct linked to 688_[M+H]+	1	True	8.6	711.544	C40H75N2O6P	SM	ZZVIPOLKRCCWFV-UHFFFAOYSA-N	O=C(NC(COP(=O)([O-])OCC[N+](C)(C)C)C(O)C=CCCCCCCCC)CCCCCCCCC=CCC=CCC=CCCCCC	530	True	True	False		False	False	null	null	75.5	100	null	null	null	93.76	Lipidomics_pos_CON_01	711.53998:7702 712.54333:3519 713.54669:832	184.08073:109 570.45514:27 711.41101:71	7187.23	7978.72	6872.34	8702.13	7761.7	4346.43	4223.21	4585.71	4435.71	4819.64	7702	7494	6901	7693	7219	7700.56	4482.17
763	18.416	711.546	711.54614_18.416	w/o MS2:RIKEN P-VS1 ID-8273 from Mouse_Adipose_WT_N_F1AA	[M+H]+		1	True	13	711.549		Unknown			530	True	True	False		False	False	null	null	98.5	99.9	null	null	null	71.57	Lipidomics_pos_CON_04	711.54614:6969 712.54949:4312 713.55285:1768	693.65125:18	4344.68	5121.28	3944.68	4529.79	4010.64	4857.14	5633.93	5773.21	6103.57	6730.36	6230	6251	6373	6969	6960	4390.43	5819.98
764	12.121	712.523	712.52295_12.121	w/o MS2:LPC 30:1	[M+Na]+	similar chromatogram in higher mz_835; adduct linked to 692_[M+H]+	1	True	9.04	712.525	C38H76NO7P	LPC	GTUSWZPMJQPAPM-UHFFFAOYSA-N	O=C(OCC(O)COP(=O)([O-])OCC[N+](C)(C)C)CCCCCCCCCCCCCCCCCC=CCCCCCCCCCC	530	True	True	False		False	False	null	null	98.8	100	null	null	null	39.55	Lipidomics_pos_CON_02	712.52295:2325 713.5263:1184 714.52966:231	86.09466:290 653.45404:1038	2978.72	3291.49	3004.26	3380.85	3240.43	2542.86	2141.07	2162.5	2176.79	2723.21	1998	2325	2205	2215	1946	3179.04	2349.49
765	9.994	712.526	712.52576_9.994	PC O-32:4	[M+H]+		0.333	True	8.8	712.528	C40H74NO7P	EtherPC	NVKREVMRJDOZFL-UHFFFAOYSA-N	O=C(OC(COCCCCCCCC)COP(=O)([O-])OCC[N+](C)(C)C)CCCCCCCCCCC=CCC=CCC=CCC=CCC	420	True	True	True		False	False	null	null	93.3	100	80.4	76.2	100	28.15	Lipidomics_pos_AH_01	712.52716:1255 713.53051:627 714.53387:246	104.10889:17 184.07281:1832 712.52661:1251	2670.21	3100	2965.96	3159.57	2885.11	485.714	589.286	630.357	632.143	742.857	504	462	451	475	471	2956.12	616.384
766	12.816	712.526	712.52618_12.816	PE P-35:3|PE P-16:0_19:3	[M+H]+		0.267	True	9.85	712.528	C40H74NO7P	EtherPE	SADPXAUXVNVASY-UHFFFAOYSA-N	O=C(OC(COC=CCCCCCCCCCCCCCC)COP(=O)(O)OCCN)CCCCCCCCC=CCC=CCC=CCC	410	True	True	True		False	False	null	null	100	100	67.6	66.1	100	33.51	Lipidomics_pos_CON_01	712.53351:1139 713.53686:905 714.54022:0	71.08401:20 93.07086:29 123.11288:14 129.05254:42 177.16154:13 245.22803:23 335.25894:52 349.27341:730 364.26102:531 458.27087:13 571.4809:48 694.50128:21 712.52734:916	665.957	640.426	548.936	395.745	123.404	117.857	175	146.429	417.857	196.429	1139	1865	1331	1407	1314	475.08	210.96
767	16.947	712.644	712.64368_16.947	TG 40:0|TG 10:0_14:0_16:0	[M+NH4]+	adduct linked to 793_[M+Na]+; similar chromatogram in higher mz_863; similar chromatogram in higher mz_1503	1	True	13.58	712.645	C43H82O6	TG	SMIGULGEODNQEX-UHFFFAOYSA-N	O=C(OCC(OC(=O)CCCCCCCCCCCCC)COC(=O)CCCCCCCCCCCCCCC)CCCCCCCCC	410	True	True	True		False	False	null	null	100	99.9	81.4	80.3	100	172.97	Lipidomics_pos_AH_04	712.64368:24148 713.64703:14179 714.65039:3387	183.17435:41 285.24316:47 439.37555:1686 467.40753:813 523.46954:657 712.64252:858	17153.2	49012.8	19212.8	51378.7	29951.1	15880.4	18866.1	18966.1	15114.3	18719.6	10742	12745	10097	9122	11131	33341.9	17509.2
768	10.375	713.498	713.49829_10.375	DG 42:9	[M+Na]+		1	True	10.55	713.511	C45H70O5	DG	FMBLKZCAGUEWQW-UHFFFAOYSA-N	O=C(OCC(OC(=O)CCCCCC=CCC=CCC=CCC=CCC=CCC=CCC=CCC=CCC=CCC)CO)CCCCCCC	420	True	True	True		False	False	null	null	93.1	100	74	75	100	69.24	Lipidomics_pos_CON_04	713.49805:5126 714.5014:2316 715.50476:834	530.43195:233 700.49231:28 713.49915:13070	4270.21	4246.81	3421.28	5231.91	4282.98	2767.86	2983.93	3128.57	3330.36	3710.71	5184	5024	5470	5126	5098	4290.32	3184.06
769	18.691	713.562	713.56195_18.691	w/o MS2:SM 13:1;2O/22:2	[M+H]+		0.333	True	8.67	713.559	C40H77N2O6P	SM	NNLWGANFHASYRM-UHFFFAOYSA-N	O=C(NC(COP(=O)([O-])OCC[N+](C)(C)C)C(O)C=CCCCCCCCC)CCCCCCCCCCCC=CCC=CCCCCC	530	True	True	False		False	False	null	null	98.2	99.5	null	null	null	34.6	Lipidomics_pos_CON_04	713.56195:2231 714.5653:1803 715.56866:612	227.12317:29 411.3493:110 524.47546:53 713.5614:1116	2246.81	1848.94	1759.57	1851.06	2046.81	996.429	898.214	1042.86	994.643	1021.43	1973	1949	1983	2231	2075	1950.37	990.379
770	15.894	713.568	713.56818_15.894	w/o MS2:TG 8:0_8:0_24:2	[M+Na]+	adduct linked to 755_[M+NH4]+	0.133	True	13.09	713.569	C43H78O6	TG	LJVCRWHWIMZEBM-UHFFFAOYSA-N	O=C(OCC(OC(=O)CCCCCCC)COC(=O)CCCCCCCCCCCC=CCC=CCCCCCCC)CCCCCCC	530	True	True	False		False	False	null	null	99.8	100	null	null	null	25.3	Lipidomics_pos_AH_04	713.56818:1657 714.57153:769 715.57489:230	496.44571:27 713.50885:91	1153.19	3055.32	1295.74	3525.53	2178.72	1101.79	1253.57	1358.93	1000	1358.93	741	915	605	584	768	2241.78	1214.75
771	12.302	714.54	714.54028_12.302	w/o MS2:LPC 30:0	[M+Na]+	adduct linked to 698_[M+H]+	0.667	True	9.64	714.541	C38H78NO7P	LPC	JCRKNCGZEDECFV-UHFFFAOYSA-N	O=C(OCC(O)COP(=O)([O-])OCC[N+](C)(C)C)CCCCCCCCCCCCCCCCCCCCCCCCCCCCC	530	True	True	False		False	False	null	null	99.9	100	null	null	null	47.4	Lipidomics_pos_CON_01	714.54028:3282 715.54363:1705 716.54699:61346	655.46313:291	2646.81	2655.32	2246.81	2536.17	2146.81	3660.71	4710.71	3710.71	3862.5	4244.64	3282	3268	3140	2726	2873	2446.84	4038.01
772	13.2	714.542	714.54218_13.2	PE O-35:3	[M+H]+		0.267	True	10.29	714.543	C40H76NO7P	EtherPE	JAGXDSWASNHGSM-UHFFFAOYSA-N	O=C(OC(COC=CCCCCCCC=CCCCCCCC)COP(=O)(O)OCCN)CCCCCCCC=CCCCCCCCC	420	True	True	True		False	False	null	null	82.2	100	76.2	39.1	90	33.31	Lipidomics_pos_CON_05	714.54156:1768 715.54491:873 716.54827:411	147.11705:50 325.23743:73 364.25961:97 376.2605:312 573.49084:178	1125.53	1440.43	1365.96	1629.79	1136.17	1096.43	1239.29	1198.21	1532.14	1325	1713	1594	1952	1930	1768	1339.23	1278.06
773	11.829	714.545	714.54535_11.829	w/o MS2:PE P-26:2_9:0	[M+H]+		0.467	True	10.52	714.543	C40H76NO7P	EtherPE	GRYALXZHYMZKFI-UHFFFAOYSA-N	O=C(OC(COC=CCCCCCCCCCCCCC=CCC=CCCCCCCC)COP(=O)(O)OCCN)CCCCCCCC	530	True	True	False		False	False	null	null	71.5	100	null	null	null	26.43	Lipidomics_pos_AH_04	714.54425:2302 715.5476:1332 716.55096:8416	97.1033:22 551.4671:36 573.48688:182 697.53467:18	3891.49	3440.43	2846.81	4897.87	3544.68	2237.5	2185.71	2339.29	2323.21	3023.21	2615	2216	2232	2353	1974	3724.28	2421.65
774	16.223	714.614	714.61414_16.223	w/o MS2:SE 28:2/21:5	[M+H]+	ion correlated with 714; ion correlated with 601	0.133	True	14.19	714.618	C49H76O2	BRSE	NAGKOUYLLGPXFP-UHFFFAOYSA-N	O=C(OC1CC2=CCC3C(CCC4(C)C(CCC34)C(C=CC(C)C(C)C)C)C2(C)CC1)CCCCC=CCC=CCC=CCC=CCC=CCC	530	True	True	False		False	False	null	null	64.8	100	null	null	null	28.63	Lipidomics_pos_CON_01	714.61414:1387 715.61749:757 716.62085:242	455.34753:11 523.46661:12 679.54553:15 714.61426:2371	991.489	1010.64	740.426	1053.19	1048.94	989.286	1075	951.786	975	1066.07	1387	1142	1169	1232	1211	968.963	1011.56
775	18.14	714.617	714.61652_18.14	CE 22:6	[M+NH4]+	adduct linked to 804_[M+Na]+; similar chromatogram in higher mz_872	1	True	14.21	714.618	C49H76O2	CE	VOEVEGPMRIYYKC-UHFFFAOYSA-N	O=C(OC1CC2=CCC3C(CCC4(C)C(CCC34)C(C)CCCC(C)C)C2(C)CC1)CCC=CCC=CCC=CCC=CCC=CCC=CCC	410	True	True	True		False	False	null	null	100	99.9	86	68.3	100	246.44	Lipidomics_pos_BL_04	714.61694:6960 715.62029:5515 716.62365:1430	135.11679:29 189.15979:25 233.22646:26 369.35153:1721	24429.8	26474.5	17221.3	28691.5	22312.8	9780.36	11046.4	11455.4	12428.6	12123.2	27501	25930	23930	25906	29267	23825.7	11366.7
776	14.284	715.389	715.3894_14.284	w/o MS2:RIKEN P-VS1 ID-8358 from Mouse_Muscle_WT_CTX0_Ctr	[M+H]+		0.133	True	3.84	715.384		Unknown			530	True	True	False		False	False	null	null	92.1	99.5	null	null	null	23.84	Lipidomics_pos_AH_04	715.3894:1221 716.39275:468 717.39611:102	715.39246:965	1119.15	2178.72	1189.36	2597.87	1523.4	962.5	1069.64	1155.36	933.929	1203.57	707	502	478	351	545	1721.68	1065.04
777	11.177	715.574	715.5741_11.177	SM 35:2;2O	[M+H]+		0.467	True	8.97	715.575	C40H79N2O6P	SM	WZMKFWKRGIXMGA-UHFFFAOYSA-N	O=C(NC(COP(=O)([O-])OCC[N+](C)(C)C)C(O)C=CCCCCCCC)CCCCCCCCCCC=CCCCCCCCCCC	420	True	True	True		False	False	null	null	100	100	71.9	80.2	100	42.42	Lipidomics_pos_CON_02	715.5741:2438 716.57745:1025 717.58081:205	162.95482:20 184.07317:4527 532.4386:23 574.49103:625 697.56995:33 715.57098:3114	2617.02	2576.6	2529.79	2934.04	2878.72	1621.43	1733.93	1589.29	1651.79	1683.93	2261	2438	2343	2405	2402	2707.05	1656.43
778	16.429	715.583	715.58344_16.429	w/o MS2:TG 8:0_8:0_24:1	[M+Na]+	ion correlated with 1001; ion correlated with 876; adduct linked to 760_[M+NH4]+	0.933	True	13.38	715.585	C43H80O6	TG	IZQWVVKUHOZISH-UHFFFAOYSA-N	O=C(OCC(OC(=O)CCCCCCC)COC(=O)CCCCCCCCCCCC=CCCCCCCCCCC)CCCCCCC	530	True	True	False		False	False	null	null	99.6	100	null	null	null	38.62	Lipidomics_pos_AH_04	715.58344:3976 716.58679:2359 717.59015:485	99.08118:20 411.34555:86 549.48407:52 571.46649:53 715.5838:5777	2359.57	8025.53	2870.21	8459.57	4474.47	2178.57	2900	3025	2232.14	2942.86	1576	1962	1507	1264	1747	5237.85	2655.85
779	10.354	716.463	716.46252_10.354	w/o MS2:LPE 36:9	[M+H]+	ion correlated with 717	0.667	True	8.03	716.465	C41H66NO7P	LPE	JYNAILMQNSAGHT-UHFFFAOYSA-N	O=C(OCC(O)COP(=O)(O)OCCN)CCCCCCCC=CCC=CCC=CCC=CCC=CCC=CCC=CCC=CCC=CCC	530	True	True	False		False	False	null	null	61.6	100	null	null	null	45.33	Lipidomics_pos_CON_03	716.46252:5067 717.46587:2614 718.46923:922	657.35651:52 716.46027:747	1500	1638.3	1268.09	1463.83	1429.79	3017.86	3566.07	3121.43	3439.29	3975	4816	4478	5067	4867	4752	1459.65	3423.88
780	12.181	716.524	716.5238_12.181	w/o MS2:NAGly 16:4;O(FA 28:6)	[M+H]+		0.067	True	10.15	716.525	C46H69NO5	NAGly	WBVUDDUKVDEDAA-UHFFFAOYSA-N	O=C(O)CNC(=O)CC(OC(=O)CCCCCCCCC=CCC=CCC=CCC=CCC=CCC=CCC)C=CCC=CCC=CCC=CCC	530	True	True	False		False	False	null	null	99.7	100	null	null	null	144.39	Lipidomics_pos_BL_01	716.5238:9490 717.52715:4714 718.53051:1614	81.06611:50 95.08586:241 504.34692:54 698.58301:173	4708.51	5595.74	5146.81	6106.38	4440.43	16946.4	21496.4	17958.9	19692.9	23683.9	19304	14094	18154	16839	14628	5199.28	19955.6
781	12.321	716.556	716.55603_12.321	PC O-32:2|PC O-16:1_16:1	[M+H]+		1	True	9.3	716.559	C40H78NO7P	EtherPC	MZDGVRYVGYDNAO-UHFFFAOYSA-N	O=C(OC(COCCCCCCCCC=CCCCCCC)COP(=O)([O-])OCC[N+](C)(C)C)CCCCCCCC=CCCCCCC	410	True	True	True		False	False	null	null	100	100	81.1	78.1	100	611.75	Lipidomics_pos_AH_01	716.55695:45773 717.5603:20879 718.56366:17638	184.07303:8128 476.27203:27 480.34537:75 716.55719:5227	97389.4	101051	93125.5	99814.9	95208.5	29848.2	33005.4	30208.9	33944.6	34485.7	62715	57075	60210	59498	61447	97317.8	32298.8
782	13.932	716.557	716.55719_13.932	PE P-35:1|PE P-17:0_18:1	[M+H]+	ion correlated with 1183; ion correlated with 1511	1	True	10.81	716.559	C40H78NO7P	EtherPE	FDQGSTMMGFGRFB-UHFFFAOYSA-N	O=C(OC(COC=CCCCCCCCCCCCCCCC)COP(=O)(O)OCCN)CCCCCCCC=CCCCCCCCC	410	True	True	True		False	False	null	null	100	100	80.3	96	100	65.26	Lipidomics_pos_CON_02	716.55804:7239 717.56139:3314 718.56475:1652	265.25601:107 280.30042:202 313.2731:138 339.28897:4571 353.30402:975 367.31927:110 378.27524:2229 462.29617:482 553.50781:68 575.53839:1698 716.52917:343	4629.79	5227.66	4314.89	5021.28	4602.13	3075	3592.86	3212.5	3553.57	3907.14	7876	7239	6670	7916	7704	4759.52	3467.99
783	11.822	716.566	716.56555_11.822	HexCer 34:1;3O|HexCer 18:1;2O/16:0;O	[M+H]+		0.333	True	8.95	716.567	C40H77NO9	HexCer_HS	FMRHRMJAYYLKAI-UHFFFAOYSA-N	O=C(NC(COC1OC(CO)C(O)C(O)C1O)C(O)C=CCCCCCCCCCCCCC)C(O)CCCCCCCCCCCCCC	410	True	True	True		False	False	null	null	100	100	98	83.3	100	126.33	Lipidomics_pos_AH_02	716.56653:8448 717.56988:2426 718.57324:600	109.10119:17 264.26755:715 282.27759:68 518.49268:454 536.5036:364 698.55499:625	15478.7	17974.5	15700	16112.8	18372.3	4466.07	4791.07	5294.64	4753.57	4976.79	4032	3487	2955	3066	3704	16727.8	4856.52
784	17.659	716.617	716.617_17.659	w/o MS2:NAGly 21:2;O(FA 22:1)	[M+H]+		1	True	12.85	716.619	C45H81NO5	NAGly	PVXNRRYHVJBDNA-UHFFFAOYSA-N	O=C(O)CNC(=O)CCCCCCCCC(OC(=O)CCCCCCCCCCCC=CCCCCCCCC)C=CCC=CCCCCCC	530	True	True	False		False	False	null	null	62.5	99.9	null	null	null	57.56	Lipidomics_pos_CON_02	716.617:5456 717.62035:2529 718.62371:564	114.12701:33 135.11609:44 137.13179:29 145.09904:54 155.10933:33 175.14758:87 179.17822:39 184.07333:52 201.1649:52 215.18153:52 233.22292:22 243.2085:87 273.22778:18 285.25494:33 303.26773:13 357.35068:25 371.35846:28 539.43481:33 699.39984:34 716.61798:392	4523.4	4619.15	3370.21	4446.81	4110.64	5362.5	5446.43	4425	4880.36	5503.57	3375	5456	3436	3528	4240	4213.94	5123.26
785	18.554	716.631	716.63062_18.554	w/o MS2:SE 28:2/21:4	[M+H]+		0.333	True	14.45	716.634	C49H78O2	BRSE	BGIDJBKNBVZBHB-UHFFFAOYSA-N	O=C(OC1CC2=CCC3C(CCC4(C)C(CCC34)C(C=CC(C)C(C)C)C)C2(C)CC1)CCCCCCCC=CCC=CCC=CCC=CCC	530	True	True	False		False	False	null	null	97.3	99.9	null	null	null	54.97	Lipidomics_pos_CON_01	716.63062:3045 717.63397:2479 718.63733:860	259.23792:26	1946.81	2387.23	1712.77	2506.38	2402.13	521.429	487.5	633.929	846.429	625	3045	2758	2865	2869	2781	2190.61	622.857
786	18.377	716.631	716.63104_18.377	CE 22:5	[M+NH4]+		0.467	True	14.36	716.634	C49H78O2	CE	XOLZNHXNFMEUGA-UHFFFAOYSA-N	O=C(OC1CC2=CCC3C(CCC4(C)C(CCC34)C(C)CCCC(C)C)C2(C)CC1)CCCCCC=CCC=CCC=CCC=CCC=CCC	410	True	True	True		False	False	null	null	100	99.9	77.6	81.5	100	41.32	Lipidomics_pos_AH_04	716.63257:2389 717.63592:1447 718.63928:411	81.06852:61 111.11491:29 133.10129:36 135.11578:139 193.19275:46 233.22707:67 287.2713:86 369.34897:4279 699.35468:57 716.42798:198 716.63513:459	4614.89	5425.53	3891.49	5082.98	5100	1025	1307.14	1342.86	1425	1400	2265	2560	2561	2854	2686	4822.93	1299.87
787	12.155	717.527	717.52661_12.155	w/o MS2:RIKEN P-VS1 ID-8424 from Mouse_Lung_WT_N_F1AA	[M+H]+		0.133	False	9.01	717.528		Unknown			530	True	True	False		False	False	null	null	99.3	100	null	null	null	81.9	Lipidomics_pos_BL_02	717.52661:5070 718.52996:1992 719.53332:365		3078.72	7153.19	3712.77	5429.79	4553.19	7657.14	9053.57	7585.71	9432.14	8819.64	9117	8029	8683	8276	8100	4785.56	8509.69
788	16.117	717.541	717.54144_16.117	DG 42:7	[M+Na]+	ion correlated with 707	0.133	True	11.88	717.543	C45H74O5	DG	AIRGHYYBGWIEJK-UHFFFAOYSA-N	O=C(OCC(OC(=O)CCCCCCCCCCCC=CCC=CCC=CCC=CCC=CCC=CCC=CCC)CO)CCCCCCC	420	True	True	True		False	False	null	null	100	99.9	75	75	100	27.36	Lipidomics_pos_AH_04	717.54144:1635 718.54479:775 719.54815:398	155.07097:5 700.42188:14 717.54126:2126	1270.21	2985.11	1553.19	3478.72	2161.7	1139.29	1501.79	1455.36	1175	1394.64	709	962	743	654	833	2289.34	1333.24
789	10.047	717.553	717.55286_10.047	SM 34:2;3O	[M+H]+		0.667	True	8.41	717.554	C39H77N2O7P	SM	SZEJSYWBKCTVOG-UHFFFAOYSA-N	O=C(NC(COP(=O)([O-])OCC[N+](C)(C)C)C(O)C(O)CCCC=CCCC)CCCCCCCCCCCC=CCCCCCCCC	420	True	True	True		False	False	null	null	100	100	66	84.6	100	35.9	Lipidomics_pos_CON_01	717.55286:2838 718.55621:1228 719.55957:437	86.09762:17 184.07268:450 699.54974:36 717.49542:18 717.52942:74 717.55695:173	3025.53	3629.79	3074.47	3714.89	2963.83	2017.86	1767.86	1960.71	2110.71	2176.79	2838	2402	2622	2483	2538	3281.65	2006.81
790	12.091	717.562	717.56232_12.091	SM 34:2;3O	[M+H]+		0.2	True	8.41	717.554	C39H77N2O7P	SM	SZEJSYWBKCTVOG-UHFFFAOYSA-N	O=C(NC(COP(=O)([O-])OCC[N+](C)(C)C)C(O)C(O)CCCC=CCCC)CCCCCCCCCCCC=CCCCCCCCC	420	True	True	True		False	False	null	null	100	99.9	90.4	62.1	100	68.33	Lipidomics_pos_CON_05	717.56232:5848 718.56567:2636 719.56903:358	184.07307:3459 575.50391:124 717.56207:1878	6225.53	6263.83	6182.98	6306.38	5880.85	3157.14	4867.86	3332.14	2614.29	3108.93	5791	8042	8207	7685	5848	6171.97	3415.87
791	12.202	717.58	717.58008_12.202	SM 35:1;2O	[M+H]+	adduct linked to 892_[M+H-H2O]+; similar chromatogram in higher mz_1566	1	True	9.32	717.591	C40H81N2O6P	SM	ASVIEZNRHGUMIU-UHFFFAOYSA-N	O=C(NC(COP(=O)([O-])OCC[N+](C)(C)C)C(O)C=CCCCCCCC)CCCCCCCCCCCCCCCCCCCCCC	420	True	True	True		False	False	null	null	100	100	83.7	83.7	100	186.3	Lipidomics_pos_BL_01	717.58612:8067 718.58947:3723 719.59283:1110	184.0726:2748 699.59509:83 717.57404:1344	20670.2	14942.6	25027.7	7046.81	26338.3	14405.4	15044.6	15935.7	16548.2	13525	17607	5291	9826	12168	16077	18804.9	15092
792	11.985	717.588	717.58759_11.985	SM 35:1;2O	[M+H]+		0.667	True	9.32	717.591	C40H81N2O6P	SM	ASVIEZNRHGUMIU-UHFFFAOYSA-N	O=C(NC(COP(=O)([O-])OCC[N+](C)(C)C)C(O)C=CCCCCCCC)CCCCCCCCCCCCCCCCCCCCCC	420	True	True	True		False	False	null	null	97.8	100	79.9	81.1	100	96.14	Lipidomics_pos_CON_05	717.58673:6048 718.59008:3497 719.59344:1098	184.07307:3459 575.50391:124 717.56207:1878	4400	6746.81	5872.34	6321.28	5995.74	3741.07	3082.14	3385.71	3755.36	3819.64	7242	6246	5908	5860	6048	5867.53	3556.56
[truncated: 1,406 more rows]
[truncated: 4 more columns]
