# Supplementary material for: Machine Learning-Based Metabolic Pattern Recognition Predicts Mode of Action for Anti-Cancer Drug Candidates
Source: Research Square preprint supplement (doi:10.21203/rs.3.rs-3494185/v1), 2024-01-26
Supplement: Supplementary file 4 [file c856793ab7164e8f936ba5f4.docx]

**Table S1.** IC50 values, MeA and structural information for training and prediction compounds

| Training/ Prediction | Compound | Isomeric SMILES | Abbreviation  (drug) | MoA | Abbreviation  (MOA) | IC50 (MTT) | Pathway |
| --- | --- | --- | --- | --- | --- | --- | --- |
| **TRAINING** | 3-Nitropropionic acid | C(C[N+](=O)[O-])C(=O)O | 3-NP | Complex II  Inhibitor (1, 2) | CPLX II | 7.02 mM | Mitochondrial respiration |
| Malonic acid | C(C(=O)O)C(=O)O | MALO | 7.13 mM |
| Metformin | CN(C(=N)N=C(N)N)C | METF | Complex I  Inhibitor (3, 4) | CPLX I | 16.68 mM |
| Rotenone | CC(=C)[C@H]1CC2=C(O1)C=CC3=C2O[C@@H]4COC5=CC(=C(C=C5[C@@H]4C3=O)OC)OC | ROTN | 1.0 µM |
| Antimycin A | CCCCCC[C@@H]1[C@H]([C@@H](OC(=O)[C@H]([C@H](OC1=O)C)NC(=O)C2=C(C(=CC=C2)NC=O)O)C)OC(=O)CC(C)C | AMYC | Complex III  Inhibitor (4, 5) | CPLX III | 35.6 µM |
| Atovaquone | OC1=C([C@H]2CC[C@@H](CC2)C2=CC=C(Cl)C=C2)C(=O)C2=CC=CC=C2C1=O | ATOV | 8.9 µM |
| Potassium cyanide | [C-]#N.[K+] | CYAN | Complex IV  inhibitor (6) | CPLX IV | 11.6 mM |
| Sodium azide | [N-]=[N+]=[N-].[Na+] | AZID | 9.27 mM |
| 2,4-Dinitrophenol | C1=CC(=C(C=C1[N+](=O)[O-])[N+](=O)[O-])O | 2DNP | Uncoupler (7, 8) | Uncoupler | 0.46 mM |
| Emodin | CC1=CC2=C(C(=C1)O)C(=O)C3=C(C2=O)C=C(C=C3O)O | EMOD | 37.0 µM |
| Carbonyl cyanide m-chlorophenyl hydrazone | C1=CC(=CC(=C1)Cl)NN=C(C#N)C#N | CCCP | 4.7 µM |
| Lovastatin | CC[C@H](C)C(=O)O[C@H]1C[C@H](C=C2[C@H]1[C@H]([C@H](C=C2)C)CC[C@@H]3C[C@H](CC(=O)O3)O)C | LOVA | HMG-CoA  reductase  inhibitor (9) | HMG-CoAr | 1.2 µM | Mevalonate Pathway |
| Atorvastatin | CC(C)C1=C(C(=C(N1CC[C@H](C[C@H](CC(=O)O)O)O)C2=CC=C(C=C2)F)C3=CC=CC=C3)C(=O)NC4=CC=CC=C4 | ATOR | 3.5 µM |
| Fluvastatin | CC(C)N1C2=CC=CC=C2C(=C1/C=C/[C@H](C[C@H](CC(=O)O)O)O)C3=CC=C(C=C3)F | FLUV | 1.0 µM |
| Paclitaxel | CC1=C2[C@H](C(=O)[C@@]3([C@H](C[C@@H]4[C@]([C@H]3[C@@H]([C@@](C2(C)C)(C[C@@H]1OC(=O)[C@@H]([C@H](C5=CC=CC=C5)NC(=O)C6=CC=CC=C6)O)O)OC(=O)C7=CC=CC=C7)(CO4)OC(=O)C)O)C)OC(=O)C | PTXL | Antimicrotubule (10, 11) | Antimicrotubule | 1.6 nM | Cytoskeleton |
| Vincristin | CC[C@@]1(C[C@@H]2C[C@@](C3=C(CCN(C2)C1)C4=CC=CC=C4N3)(C5=C(C=C6C(=C5)[C@]78CCN9[C@H]7[C@@](C=CC9)([C@H]([C@@]([C@@H]8N6C=O)(C(=O)OC)O)OC(=O)C)CC)OC)C(=O)OC)O | VINC | 0.9 nM |
| Doxorubicin | C[C@H]1[C@H]([C@H](C[C@@H](O1)O[C@H]2C[C@@](CC3=C2C(=C4C(=C3O)C(=O)C5=C(C4=O)C(=CC=C5)OC)O)(C(=O)CO)O)N)O | DOXO | Topoisomerase II inhibitor (12) | TopoII | 1.2 µM | DNA  replication |
| Mitoxantrone | OCCNCCNC1=C2C(=O)C3=C(O)C=CC(O)=C3C(=O)C2=C(NCCNCCO)C=C1 | MITO | 1.6 µM |
| Etoposide | C[C@@H]1OC[C@@H]2[C@@H](O1)[C@@H]([C@H]([C@@H](O2)O[C@H]3[C@H]4COC(=O)[C@@H]4[C@@H](C5=CC6=C(C=C35)OCO6)C7=CC(=C(C(=C7)OC)O)OC)O)O | ETOP | 48.5 µM |
| Irinotecan | CCC1=C2CN3C(=CC4=C(C3=O)COC(=O)[C@@]4(CC)O)C2=NC5=C1C=C(C=C5)OC(=O)N6CCC(CC6)N7CCCCC7 | IRIN | Topoisomerase I inhibitor (13) | TopoI | 67.4 µM |
| Camptothecin | CC[C@@]1(C2=C(COC1=O)C(=O)N3CC4=CC5=CC=CC=C5N=C4C3=C2)O | CMPT | 0.8 µM |
| Daporinad | C1CN(CCC1CCCCNC(=O)/C=C/C2=CN=CC=C2)C(=O)C3=CC=CC=C3 | FK866 | NAMPT  Inhibitor (14) | NAMPT | 0.3 nM * | NAD+ salvage |
| GMX1778 | C1=CC(=CC=C1OCCCCCCN=C(NC#N)NC2=CC=NC=C2)Cl | GMX | 0.1 nM * |
| GNE617 | C1=CC(=CC=C1CNC(=O)C2=CN3C=CN=C3C=C2)S(=O)(=O)C4=CC(=CC(=C4)F)F | GNE | 20.0 µM * |
| Hexachlorophene | CLC1CC(CL)C(C(C1O)CC1C(O)C(CL)CC(C1CL)CL)CL | HEXA | GDH  Inhibitor (15) | GDH | 10.0 µM | Glutaminolysis |
| Bithionol | CLC1CC(SC2CC(CL)CC(C2O)CL)C(C(C1)CL)O | BITN | 31.3 µM |
| Rapamycin | C[C@@H]1CC[C@H]2C[C@@H](/C(=C/C=C/C=C/[C@H](C[C@H](C(=O)[C@@H]([C@@H](/C(=C/[C@H](C(=O)C[C@H](OC(=O)[C@@H]3CCCCN3C(=O)C(=O)[C@@]1(O2)O)[C@H](C)C[C@@H]4CC[C@H]([C@@H](C4)OC)O)C)/C)O)OC)C)C)/C)OC | RAPA | PI3K/mTOR  Inhibitor (16, 17) | mTOR | 0.05 µM | Signaling/ Protein phosphorylation |
| Wortmannin | CC(=O)O[C@@H]1C[C@]2([C@@H](CCC2=O)C3=C1[C@]4([C@H](OC(=O)C5=COC(=C54)C3=O)COC)C)C | WRTN | 4.1 µM |
| Alpelisib | CC1=C(SC(=N1)NC(=O)N2CCC[C@H]2C(=O)N)C3=CC(=NC=C3)C(C)(C)C(F)(F)F | ALPL | 26.1 µM |
| Perifosine | CCCCCCCCCCCCCCCCCCOP(=O)(OC1CC[N+](CC1)(C)C)[O-] | PRFN | AKT  Inhibitor (18, 19) | AKT | 2.6 µM |
| Oridonin | CC1(CC[C@@H]([C@]23[C@@H]1[C@@H]([C@]([C@]45[C@H]2CC[C@H]([C@H]4O)C(=C)C5=O)(OC3)O)O)O)C | ORID | 15.7 µM |
| 6-Aminonicotinamide | NC(=O)C1CCC(N)NC1 | 6-AN | Inhibitor of  oxidative PPP (20, 21) | OPP | 180.0 µM* | NADPH biosynthesis |
| glucose-6-phosphate dehydrogenase (G6PD) inhibitor-1 | C1CCC(=O)C2=CN=C(N=C2C1)NC3=CSC(=C3)C#N | GPDi | 59.0 µM |
| Maslinic acid | C[C@@]12CC[C@@H]3[C@@]([C@H]1CC=C4[C@]2(CC[C@@]5([C@H]4CC(CC5)(C)C)C(=O)O)C)(C[C@H]([C@@H](C3(C)C)O)O)C | MASA | Putative CEPT1  Inhibitor (22) | PLB | 57.6 µM | Induce apoptosis |
| Betulinic acid | CC(=C)[C@@H]1CC[C@]2([C@H]1[C@H]3CC[C@@H]4[C@]5(CC[C@@H](C([C@@H]5CC[C@]4([C@@]3(CC2)C)C)(C)C)O)C)C(=O)O | BETA | 19.8 µM |
| 11-Keto-beta-boswellic acid | C[C@@H]1CC[C@@]2(CC[C@@]3(C(=CC(=O)[C@H]4[C@]3(CC[C@@H]5[C@@]4(CC[C@H]([C@]5(C)C(=O)O)O)C)C)[C@@H]2[C@H]1C)C)C | BOWA | 76.4 µM |
| Epigallocatechin gallate | C1[C@H]([C@H](OC2=CC(=CC(=C21)O)O)C3=CC(=C(C(=C3)O)O)O)OC(=O)C4=CC(=C(C(=C4)O)O)O | EGCG | FASN  Inhibitor (23, 24) | FAB | 61.4 µM | Lipid biosynthesis |
| Apigenin | OC1CCC(CC1)C1CC(=O)C2C(O1)CC(CC2O)O | APIG | 22.8 µM |
| **PREDICTION** | Breastin |  | BRST | Unknown |  | 1.5 µM |
| AAHR | C[C@@]12CC[C@]([C@@](COC(C)=O)(C)[C@H]3OC(C)=O)([H])[C@@](C[C@H]3OC(C)=O)(C)[C@@]1([H])CC=C4[C@@]2(C)CC[C@](CC5)(C(N6CCCN(C(C7=CC=CC=C7C(C8=C(C=C(N(CC)CC)C=C8)O9)=C(C=C/%10)C9=CC%10=[N+](CC)\CC)=O)CC6)=O)[C@@]4([H])[C@@H](C)[C@@H]5C.[Cl-] | AAHR | 285 nM |
| Cucurbitacin B | CC(=O)OC(C)(C)/C=C/C(=O)[C@@](C)([C@H]1[C@@H](C[C@@]2([C@@]1(CC(=O)[C@@]3([C@H]2CC=C4[C@H]3C[C@@H](C(=O)C4(C)C)O)C)C)C)O)O | QQrB | 30 nM |
| Glycyrrhetinic acid | C[C@]12CC[C@](C[C@H]1C3=CC(=O)[C@@H]4[C@]5(CC[C@@H](C([C@@H]5CC[C@]4([C@@]3(CC2)C)C)(C)C)O)C)(C)C(=O)O | GLYA | 73.1 µM |

*: CV results

**References:**

1. K. Kluckova, A. Bezawork-Geleta, J. Rohlena, L. Dong, J. Neuzil, Mitochondrial complex II, a novel target for anti-cancer agents. *Biochim Biophys Acta* **1827**, 552-564 (2013).

2. A. P. Wojtovich, C. O. Smith, C. M. Haynes, K. W. Nehrke, P. S. Brookes, Physiological consequences of complex II inhibition for aging, disease, and the mKATP channel. *Biochim Biophys Acta* **1827**, 598-611 (2013).

3. E. Fontaine, Metformin-Induced Mitochondrial Complex I Inhibition: Facts, Uncertainties, and Consequences. *Front Endocrinol (Lausanne)* **9**, 753 (2018).

4. L. Wang *et al.*, Mitochondrial Respiratory Chain Inhibitors Involved in ROS Production Induced by Acute High Concentrations of Iodide and the Effects of SOD as a Protective Factor. *Oxid Med Cell Longev* **2015**, 217670 (2015).

5. K. M. Owens, M. Kulawiec, M. M. Desouki, A. Vanniarajan, K. K. Singh, Impaired OXPHOS complex III in breast cancer. *PLoS One* **6**, e23846 (2011).

6. I. P. Hargreaves *et al.*, Inhibition of mitochondrial complex IV leads to secondary loss complex II-III activity: implications for the pathogenesis and treatment of mitochondrial encephalomyopathies. *Mitochondrion* **7**, 284-287 (2007).

7. S. Demine, P. Renard, T. Arnould, Mitochondrial Uncoupling: A Key Controller of Biological Processes in Physiology and Diseases. *Cells* **8** (2019).

8. H. Terada, Uncouplers of oxidative phosphorylation. *Environ Health Perspect* **87**, 213-218 (1990).

9. S. Goulitquer *et al.*, Consequences of blunting the mevalonate pathway in cancer identified by a pluri-omics approach. *Cell Death Dis* **9**, 745 (2018).

10. C. Qi *et al.*, Anti-mitotic chemotherapeutics promote apoptosis through TL1A-activated death receptor 3 in cancer cells. *Cell Res* **28**, 544-555 (2018).

11. B. A. Weaver, How Taxol/paclitaxel kills cancer cells. *Mol Biol Cell* **25**, 2677-2681 (2014).

12. J. L. Nitiss, Targeting DNA topoisomerase II in cancer chemotherapy. *Nat Rev Cancer* **9**, 338-350 (2009).

13. A. Talukdar, B. Kundu, D. Sarkar, S. Goon, M. A. Mondal, Topoisomerase I inhibitors: Challenges, progress and the road ahead. *Eur J Med Chem* **236**, 114304 (2022).

14. L. E. Navas, A. Carnero, Nicotinamide Adenine Dinucleotide (NAD) Metabolism as a Relevant Target in Cancer. *Cells* **11** (2022).

15. Y. Bian *et al.*, Glutamate Dehydrogenase as a Promising Target for Hyperinsulinism Hyperammonemia Syndrome Therapy. *Curr Med Chem* **29**, 2652-2672 (2022).

16. N. Vasan, L. C. Cantley, At a crossroads: how to translate the roles of PI3K in oncogenic and metabolic signalling into improvements in cancer therapy. *Nat Rev Clin Oncol* **19**, 471-485 (2022).

17. Y. Peng, Y. Wang, C. Zhou, W. Mei, C. Zeng, PI3K/Akt/mTOR Pathway and Its Role in Cancer Therapeutics: Are We Making Headway? *Front Oncol* **12**, 819128 (2022).

18. J. J. Gills, P. A. Dennis, Perifosine: update on a novel Akt inhibitor. *Curr Oncol Rep* **11**, 102-110 (2009).

19. M. Song *et al.*, Targeting AKT with Oridonin Inhibits Growth of Esophageal Squamous Cell Carcinoma In Vitro and Patient-Derived Xenografts In Vivo. *Mol Cancer Ther* **17**, 1540-1553 (2018).

20. R. L. Tyson, J. Perron, G. R. Sutherland, 6-Aminonicotinamide inhibition of the pentose phosphate pathway in rat neocortex. *Neuroreport* **11**, 1845-1848 (2000).

21. J. M. Ghergurovich *et al.*, A small molecule G6PD inhibitor reveals immune dependence on pentose phosphate pathway. *Nat Chem Biol* **16**, 731-739 (2020).

22. V. R. Yadav, S. Prasad, B. Sung, R. Kannappan, B. B. Aggarwal, Targeting inflammatory pathways by triterpenoids for prevention and treatment of cancer. *Toxins (Basel)* **2**, 2428-2466 (2010).

23. M. H. Pan, C. C. Lin, J. K. Lin, W. J. Chen, Tea polyphenol (-)-epigallocatechin 3-gallate suppresses heregulin-beta1-induced fatty acid synthase expression in human breast cancer cells by inhibiting phosphatidylinositol 3-kinase/Akt and mitogen-activated protein kinase cascade signaling. *J Agric Food Chem* **55**, 5030-5037 (2007).

24. K. Brusselmans, R. Vrolix, G. Verhoeven, J. V. Swinnen, Induction of cancer cell apoptosis by flavonoids is associated with their ability to inhibit fatty acid synthase activity. *J Biol Chem* **280**, 5636-5645 (2005).
