# Supplementary material for: Machine Learning-Based Metabolic Pattern Recognition Predicts Mode of Action for Anti-Cancer Drug Candidates
Source: Research Square preprint supplement (doi:10.21203/rs.3.rs-3494185/v1), 2024-01-26
Supplement: Supplementary file 5 [file d80828695762f7425f30245e.xlsx]

## Sheet: MRM method 2020
						Table S2. Structural information and LC-MS/MS parameters of analyzed CCEM metabolites							[min]							[V]
Accuracy For QCs Used	Accuracy For Stds Used	Acq. Index - 1	Baseline Sub. Window	Calc Conc Used	Comment	Name	Abbreviation	PubChem_ID	InChIKey	KEGG ID	Sum formula	Canonical SMILES	Expected RT	Monoisotopic mass (neutral)	Noise Percentage	Peak Splitting Factor	Period	Q1 Mass - 1	Q3 Mass - 1	DP	CE	CXP
TRUE	TRUE	28	2	TRUE		2',3'-cyclic AMP	2,3-cAMP	101812	KMYWVDDIPVNLME	C02353	C10H12N5O6P	C1=NC(=C2C(=N1)N(C=N2)C3C4C(C(O3)CO)OP(=O)(O4)O)N	6.215	329.053	40	4	1	328.045	134	-125	-36	-5
TRUE	TRUE	163	2	TRUE		2-phosphoglycolic acid	2PG	529	ASCFNMCAHFUBCO	C00988	C2H5O6P	C(C(=O)[O-])OP(=O)([O-])[O-]	12.9	155.982	40	5	1	154.974	79	-15	-36	-35
TRUE	TRUE	1	2	TRUE		glycerate 2-phosphate	2PGA	59	GXIURPTVHJPJLF	C00631	C3H7O7P	C(C(C(=O)O)OP(=O)(O)O)O	12.71	185.993	40	1	1	184.985	79.01	-25	-20	-35
TRUE	TRUE	29	2	TRUE		3',5'-cyclic AMP	3,5-cAMP	6076	IVOMOUWHDPKRLL	C00575	C10H12N5O6P	C1C2C(C(C(O2)N3C=NC4=C3N=CN=C4N)O)OP(=O)(O1)O	7.21	329.053	40	4	1	328.045	134	-125	-36	-5
TRUE	TRUE	2	2	TRUE		3-dehydroshikimate	3DeHy-SHIK	439774	SLWWJZMPHJJOPH	C02637	C7H8O5	C1C(C(C(=O)C=C1C(=O)O)O)O	2.7	172.037	40	4	1	171.029	127	-25	-16	-15
TRUE	TRUE	177	2	TRUE		3-hydroxypyruvic acid	3-OH-PYR	964	HHDDCCUIIUWNGJ	C00168	C3H4O4	C(C(=O)C(=O)O)O	0	104.011	40	2	1	103.003	59	-30	-22	-7
TRUE	TRUE	3	2	TRUE		3-phosphoglycerate	3PGA	439183	OSJPPGNTCRNQQC	C00597	C3H7O7P	C(C(C(=O)O)O)OP(=O)(O)O	13.2	185.993	40	4	1	184.985	96.7	-30	-22	-7
TRUE	TRUE	4	2	TRUE		5-methyltetrahydrofolate	5Me-THF	135398561	ZNOVTXRBGFNYRX	C00440	C20H25N7O6	CN1C(CNC2=C1C(=O)NC(=N2)N)CNC3=CC=C(C=C3)C(=O)NC(CCC(=O)O)C(=O)O	9.3	459.187	40	1	1	458.179	329.1	-40	-35	-10
TRUE	TRUE	5	2	TRUE		6-phosphogluconic acid	6PG	91493	BIRSGZKFKXLSJQ	C00345	C6H13O10P	C(C(C(C(C(C(=O)O)O)O)O)O)OP(=O)(O)O	13.1	276.025	40	25	1	275.017	79	-60	-66	-5
TRUE	TRUE	6	2	TRUE		8-hydroxycopalyl diphosphate	8OH-COPA-PP	56927957	ZDGVATANBJCRHY	not available	C20H38O8P2	C/C(CCC1C2(C)CCCC(C)(C)C2CCC1(O)C)=C\COP(O)(OP(O)(O)=O)=O	19	468.204	40	2	1	467.196	78.8	-220	-52	-27
TRUE	TRUE	8	2	TRUE		acetoacetyl-CoA	AcAc-CoA	92153	OJFDKHTZOUZBOS	C00332	C25H40N7O18P3S	CC(=O)CC(=O)SCCNC(=O)CCNC(=O)C(C(C)(C)COP(=O)(O)OP(=O)(O)OCC1C(C(C(O1)N2C=NC3=C2N=CN=C3N)O)OP(=O)(O)O)O	19.5	851.136	40	25	1	850.128	408	-220	-52	-27
TRUE	TRUE	7	2	TRUE		acetyl-CoA	AcCoA	444493	ZSLZBFCDCINBPY	C00024	C23H38N7O17P3S	CC(=O)SCCNC(=O)CCNC(=O)C(C(C)(C)COP(=O)(O)OP(=O)(O)OCC1C(C(C(O1)N2C=NC3=C2N=CN=C3N)O)OP(=O)(O)O)O	17.6	809.126	40	25	1	808.118	407.9	-220	-52	-27
TRUE	TRUE	9	2	TRUE		aconitic acid	ACT	309	GTZCVFVGUGFEME	C00417	C6H6O6	C(C(=CC(=O)O)C(=O)O)C(=O)O	13.27	174.016	40	2	1	173.008	128.7	-25	-10	-55
TRUE	TRUE	10	2	TRUE		adenosine	Adenosine	60961	OIRDTQYFTABQOQ	C00212	C10H13N5O4	C1=NC2=C(C(=N1)N)N=CN2C3C(C(C(O3)CO)O)O	2.5	267.097	40	25	1	266.089	133.86	-70	-12	-1
TRUE	TRUE	11	2	TRUE		adenylosuccinic acid	Adenylo-Suc	440122	OFBHPPMPBOJXRT	C03794	C14H18N5O11P	C1=NC(=C2C(=N1)N(C=N2)C3C(C(C(O3)COP(=O)(O)O)O)O)NC(CC(=O)O)C(=O)O	15.8	463.074	40	5	1	462.066	133.9	-85	-62	-7
TRUE	TRUE	12	2	TRUE		adenosine 5'-diphosphate	ADP	6022	XTWYTFMLZFPYCI	C00008	C10H15N5O10P2	C1=NC2=C(C(=N1)N)N=CN2C3C(C(C(O3)COP(=O)(O)OP(=O)(O)O)O)O	13.31	427.029	40	1	1	426.021	78.85	-75	-66	-3
TRUE	TRUE	13	2	TRUE		ADP-glucose	ADP-glucose	16500	WFPZSXYXPSUOPY	C00498	C16H25N5O15P2	C1=NC2=C(C(=N1)N)N=CN2C3C(C(C(O3)COP(=O)(O)OP(=O)(O)OC4C(C(C(C(O4)CO)O)O)O)O)O	10.56	589.082	40	5	1	588.074	345.9	-140	-32	-19
C15H24N5O17P3	TRUE	15	2	TRUE		ADP-ribose 2'-phosphate	ADPPR	439957	RCBVLCGGOOAHQO-JEVGYPOASA-N	C03246	C15H24N5O17P3	NC1=C(N=C2)C(N2[C@@H]([C@@H]([C@@H]3O)OP(O)(O)=O)O[C@@H]3COP(OP(OC[C@H]4CC([C@@H]([C@@H]4O)O)O)(O)=O)(O)=O)=NC=N1	16.45	639.038	40	5	1	638.03	426.022	-170	-34	-19
TRUE	TRUE	14	2	TRUE		ADP-D-ribose	ADPR	33576	SRNWOUGRCWSEMX	C00301	C15H23N5O14P2	C1=NC2=C(C(=N1)N)N=CN2C3C(C(C(O3)COP(=O)(O)OP(=O)(O)OCC4C(C(C(O4)O)O)O)O)O	10.5	559.072	40	20	1	558.064	346	-170	-34	-19
						AICA ribonucleotide	AICAR	65110	NOTGFIUVDGNKRI	C04677	C9H15N4O8P	C1=NC(=C(N1C2C(C(C(O2)COP(=O)(O)O)O)O)N)C(=O)N	0	338.063				337.055	78.9	-85	-50	-5
						5-aminoimidazole ribonucleotide	AIR	161500	PDACUKOKVHBVHJ	C03373	C8H14N3O7P	C1=C(N(C=N1)C2C(C(C(O2)COP(=O)(O)O)O)O)N	0	295.057				294.049	78.9	-40	-43	-10
TRUE	TRUE	17	2	TRUE		2-ketoglutaric acid	2-OG	51	KPGXRSRHYNQIFN	C00026	C5H6O5	C(CC(=O)O)C(=O)C(=O)O	10.7	146.022	40	10	1	145.014	101	-10	-12	-13
TRUE	TRUE	166	2	TRUE		L-alanine	ALA	5950	QNAYBMKLOCPYGJ	C00041	C3H7NO2	CC(C(=O)O)N	0.7	89.048	40	5	1	88.04	41.9	-20	-20	-13
						allantoic acid	ALLANTOATE	203	NUCLJNSWZCHRKL	C00499	C4H8N4O4	C(C(=O)O)(NC(=O)N)NC(=O)N	2.6	176.055				175.047	132.03	-35	-32	-12
TRUE	TRUE	19	2	TRUE		allantoin	ALT	204	POJWUDADGALRAB	C01551	C4H6N4O3	C1(C(=O)NC(=O)N1)NC(=O)N	0.66	158.044	40	10	1	157.036	97.2	-60	-16	-1
TRUE	TRUE	20	2	TRUE		adenosine 5'-monophosphate	AMP	6083	UDMBCSSLTHHNCD	C00020	C10H14N5O7P	C1=NC2=C(C(=N1)N)N=CN2C3C(C(C(O3)COP(=O)(O)O)O)O	8.82	347.063	40	20	1	346.055	78.82	-70	-52	-3
TRUE	TRUE	21	2	TRUE		L-arginine	ARG	6322	ODKSFYDXXFIFQN	C00062	C6H14N4O2	C(CC(C(=O)O)N)CN=C(N)N	0.6	174.112	40	2	1	173.104	131	-50	-18	-7
TRUE	TRUE	159	2	TRUE		ascorbic acid	ASC	54670067	CIWBSHSKHKDKBQ	C00072	C6H8O6	C(C(C1C(=C(C(=O)O1)O)O)O)O	2.8	176.032	40	2	1	175.024	115	-25	-25	-5
TRUE	TRUE	23	2	TRUE		L-asparagine	ASN	6267	DCXYFEDJOCDNAF	C00152	C4H8N2O3	C(C(C(=O)O)N)C(=O)N	0.7	132.053	40	4	1	131.045	87.1	-75	-16	-11
TRUE	TRUE	24	2	TRUE		L-aspartic acid	ASP	5960	CKLJMWTZIZZHCS	C00049	C4H7NO4	C(C(C(=O)O)N)C(=O)O	1.85	133.038	40	10	1	132	88	-40	-18	-13
TRUE	TRUE	25	2	TRUE		adenosine triphosphate	ATP	5957	ZKHQWZAMYRWXGA	C00002	C10H16N5O13P3	C1=NC2=C(C(=N1)N)N=CN2C3C(C(C(O3)COP(=O)(O)OP(=O)(O)OP(=O)(O)O)O)O	15.6	506.996	40	10	1	505.988	158.78	-80	-38	-9
TRUE	TRUE	28	2	TRUE		ureidosuccinic acid	CA	279	HLKXYZVTANABHZ	C00438	C5H8N2O5	C(C(C(=O)O)NC(=O)N)C(=O)O	10.05	176.043	40	10	1	175.035	131.8	-25	-16	-7
						carboxyaminoimidazole ribotide	CAIR	165388	XFVULMDJZXYMSG	C04751	C9H14N3O9P	C1=NC(=C(N1C2C(C(C(O2)COP(=O)(O)O)O)O)N)C(=O)O	0	339.047				338.039	78.9	-40	-35	-10
TRUE	TRUE	30	2	TRUE		3-ureidopropionic acid	CarbamoylAla	111	JSJWCHRYRHKBBW	C02642	C4H8N2O3	C(CNC(=O)N)C(=O)O	2.76	132.053	40	2	1	131.045	87.9	-10	-14	-13
TRUE	TRUE	32	2	TRUE		cytidine 5'-diphosphate	CDP	6132	ZWIADYZPOWUWEW	C00112	C9H15N3O11P2	C1=CN(C(=O)N=C1N)C2C(C(C(O2)COP(=O)(O)OP(=O)(O)O)O)O	13.11	403.018	40	10	1	402.01	78.87	-65	-70	-5
TRUE	TRUE	172	2	TRUE		CDP-choline	CDP-CHOL	13804	RZZPDXZPRHQOCG	C00307	C14H26N4O11P2	C[N+](C)(C)CCOP(=O)([O-])OP(=O)(O)OCC1C(C(C(O1)N2C=CC(=NC2=O)N)O)O	2.4	488.107	40	20	1	487.099	428	-10	-20	-23
TRUE	TRUE	33	2	TRUE		4-diphosphocytidyl-2-C-methyl-D-erythritol	CDP-ME	46936756	YFAUKWZNPVBCFF	C11435	C14H25N3O14P2	CC(CO)(C(COP(=O)(O)OP(=O)(O)OCC1C(C(C(O1)N2C=CC(=NC2=O)N)O)O)O)O	10	521.081	40	20	1	520.073	78.9	-120	-108	-9
TRUE	TRUE	34	2	TRUE		4-CDP-2-C-methyl-D-erythritol 2-phosphate	CDP-MEP	443200	HTJXTKBIUVFUAR	C11436	C14H26N3O17P3	CC(CO)(C(COP(=O)(O)OP(=O)(O)OCC1C(C(C(O1)N2C=CC(=NC2=O)N)O)O)O)OP(=O)(O)O	15.49	601.048	40	7	1	600.039	78.9	-115	-126	-19
TRUE	TRUE	35	2	TRUE		3',5'-cyclic GMP	cGMP	135398570	ZOOGRGPOEVQQDX	C00942	C10H12N5O7P	C1C2C(C(C(O2)N3C=NC4=C3NC(=NC4=O)N)O)OP(=O)(O1)O	4.52	345.047	40	5	1	344.039	150	-70	-34	-11
TRUE	TRUE	164	2	TRUE		chloride	chloride	312	VEXZGXHMUGYJMC	C00698	Cl	[Cl-]	3	34.9694	40	5	1	35	35	-50	-10	-10
TRUE	TRUE	160	2	TRUE		chorismic acid	CHOR	12039	WTFXTQVDAKGDEY	C00251	C10H10O6	C=C(C(=O)O)OC1C=C(C=CC1O)C(=O)O	0	226.048	40	2	1	225.04	179.03	-35	-25	-10
TRUE	TRUE	160	2	TRUE		chorismic acid	CHOR-H2O	12039	WTFXTQVDAKGDEY	C00251	C10H10O6	C=C(C(=O)O)OC1C=C(C=CC1O)C(=O)O	0	226.048	40	2	1	207.05	179.03	-240	-38	-13
TRUE	TRUE	36	2	TRUE		citric acid	CIT	311	KRKNYBCHXYNGOX	C00158	C6H8O7	C(C(=O)O)C(CC(=O)O)(C(=O)O)O	14.6	192.027	40	25	1	191.019	87	-35	-22	-15
TRUE	TRUE	37	2	TRUE		L-citrulline	CITRUL	9750	RHGKLRLOHDJJDR	C00327	C6H13N3O3	C(CC(C(=O)O)N)CNC(=O)N	0.66	175.096	40	2	1	174.088	131	-35	-18	-7
TRUE	TRUE	38	2	TRUE		cytidine 5'-monophosphate	CMP	6131	IERHLVCPSMICTF	C00055	C9H14N3O8P	C1=CN(C(=O)N=C1N)C2C(C(C(O2)COP(=O)(O)O)O)O	7	323.052	40	4	1	322.044	79	-65	-68	-5
TRUE	TRUE	40	2	TRUE		coenzyme A	CoA	87642	RGJOEKWQDUBAIZ	C00010	C21H36N7O16P3S	CC(C)(COP(=O)(O)OP(=O)(O)OCC1C(C(C(O1)N2C=NC3=C2N=CN=C3N)O)OP(=O)(O)O)C(C(=O)NCCC(=O)NCCS)O	17	767.115	40	2	1	766.107	407.9	-245	-50	-19
TRUE	TRUE	41	2	TRUE		creatine	CREA	586	CVSVTCORWBXHQV	C00300	C4H9N3O2	CN(CC(=O)O)C(=N)N	0.7	131.069	40	10	1	130.061	88.1	-25	-14	-5
TRUE	TRUE	42	2	TRUE		phosphocreatine	CREA-P	9548602	DRBBFCLWYRJSJZ	C02305	C4H10N3O5P	CN(CC(=O)O)C(=NP(=O)(O)O)N	9.6	211.036	40	2	1	210.028	78.9	-35	-22	-1
TRUE	TRUE	43	2	TRUE		cytidine triphosphate	CTP	6176	PCDQPRRSZKQHHS	C00063	C9H16N3O14P3	C1=CN(C(=O)N=C1N)C2C(C(C(O2)COP(=O)(O)OP(=O)(O)OP(=O)(O)O)O)O	15.4	482.985	40	20	1	481.977	158.83	-85	-36	-9
TRUE	TRUE	167	2	TRUE		L-cysteine	CYS	5862	XUJNEKJLAYXESH	C00097	C3H7NO2S	C(C(C(=O)O)N)S	0.7	121.02	40	2	1	120.012	79.8	-25	-32	-2
TRUE	TRUE	168	2	TRUE		L-cystine	CYSN	67678	LEVWYRKDKASIDU	C00491	C6H12N2O4S2	C(C(C(=O)O)N)SSCC(C(=O)O)N	0.84	240.024	40	2	1	239.016	120	-40	-32	-1
TRUE	TRUE	45	2	TRUE		cytidine	Cytidine	6175	UHDGCWIWMRVCDJ	C00475	C9H13N3O5	C1=CN(C(=O)N=C1N)C2C(C(C(O2)CO)O)O	0.95	243.086	40	5	1	242.078	108.86	-70	-18	-5
TRUE	TRUE	165	2	TRUE		2'-deoxyadenosine	dADO	13730	OLXZPDWKRNYJJZ	C00559	C10H13N5O3	C1C(C(OC1N2C=NC3=C(N=CN=C32)N)CO)O	2.5	251.102	40	20	1	250.094	134	-115	-26	-9
TRUE	TRUE	46	2	TRUE		2'-deoxyadenosine-5'-diphosphate	dADP	188966	DAEAPNUQQAICNR	C00206	C10H15N5O9P2	C1C(C(OC1N2C=NC3=C2N=CN=C3N)COP(=O)(O)OP(=O)(O)O)O	13.5	411.035	40	8	1	410.027	78.88	-60	-76	-3
TRUE	TRUE	184	2	TRUE		2'-deoxyadenosine-5'-monophosphate	dAMP	12599	KHWCHTKSEGGWEX	C00360	12599	C1C(C(OC1N2C=NC3=C(N=CN=C32)N)COP(=O)(O)O)O	9.14	331.068	40	5	1	330.06	195	-85	-22	-17
TRUE	TRUE	185	2	TRUE		deoxyadenosine triphosphate	dATP	15993	SUYVUBYJARFZHO	C00131	C10H16N5O12P3	C1C(C(OC1N2C=NC3=C2N=CN=C3N)COP(=O)(O)OP(=O)(O)OP(=O)(O)O)O	15.48	491.001	40	20	1	489.993	391.9	-90	-34	-25
TRUE	TRUE	47	2	TRUE		dehydroascorbic acid	DeHyASC	440667	SBJKKFFYIZUCET	C05422	C6H6O6	C(C(C1C(=O)C(=O)C(=O)O1)O)O	0.8	174.016	40	4	1	173.008	127	-15	-18	-17
TRUE	TRUE	48	2	TRUE		2'-deoxyguanosine 5'-monophosphate	dGMP	135398597	LTFMZDNNPPEQNG	C00362	C10H14N5O7P	C1C(C(OC1N2C=NC3=C2NC(=NC3=O)N)COP(=O)(O)O)O	8.4	347.063	40	5	1	346.055	78.81	-80	-42	-3
TRUE	TRUE	85	2	TRUE		deoxyguanosine	dGUA	135398592	YKBGVTZYEHREMT	C00330	C10H13N5O4	C1C(C(OC1N2C=NC3=C2N=C(NC3=O)N)CO)O	1.5	267.097	40	25	1	266.089	150.04	-115	-24	-3
TRUE	TRUE	49	2	TRUE		dihydroxyacetone phosphate	DHAP	668	GNGACRATGGDKBX	C00111	C3H7O6P	C(C(=O)COP(=O)(O)O)O	8.47	169.998	40	3	1	168.99	97	-35	-14	-11
TRUE	TRUE	50	2	TRUE		dihydroorotic acid	DHO	648	UFIVEPVSAGBUSI	C00337	C5H6N2O4	C1C(NC(=O)NC1=O)C(=O)O	3.3	158.033	40	2	1	157.025	112.7	-40	-10	-5
TRUE	TRUE	178	2	TRUE		digalacturonic acid	DIGALACTURON	439694	IGSYEZFZPOZFNC	C02273	C12H18O13	C1(C(C(OC(C1O)OC2C(C(C(OC2C(=O)O)O)O)O)C(=O)O)O)O	9.52	370.075	40	10	1	369.067	175	-75	-18	-17
TRUE	TRUE	146	2	TRUE		disccharides_sum	Disccharides_sum			not available	C12H22O11	C(C1C(C(C(C(O1)OC2(C(C(C(O2)CO)O)O)CO)O)O)O)O	0.8	342.116	40	5	1	341.108	89.01	-240	-38	-13
TRUE	TRUE	169	2	TRUE		dimethylallyl diphosphate	DMA-PP	647	CBIDRCWHNCKSTO	C00235	C26H42N7O19P3S	CC(=CCOP(=O)(O)OP(=O)(O)O)C	14.2	246.006	40	2	1	244.998	78.9	-15	-44	-37
TRUE	TRUE	52	2	TRUE		deoxyribose 5-phosphate	dR5P	45934311	KKZFLSZAWCYPOC	C00673	C5H11O7P	C1C(C(OC1O)COP(=O)(O)O)O	0	214.024	40	7	1	212.947	97.1	-40	-20	-19
C00363	TRUE	53	2	TRUE		thymidine-5'-diphosphate	dTDP	164628	UJLXYODCHAELLY	C00363	C10H16N2O11P2	CC1=CN(C(=O)NC1=O)C2CC(C(O2)COP(=O)(O)OP(=O)(O)O)O	13.4	402.023	40	5	1	401.015	78.81	-70	-68	-3
TRUE	TRUE	54	2	TRUE		thymidine 5'-monophosphate	dTMP	9700	GYOZYWVXFNDGLU	C00364	C10H15N2O8P	CC1=CN(C(=O)NC1=O)C2CC(C(O2)COP(=O)(O)O)O	8.7	322.057	40	2	1	321.049	78.81	-65	-58	-3
TRUE	TRUE	55	2	TRUE		thymidine-5'-triphosphate	dTTP	64968	NHVNXKFIZYSCEB	C00459	C10H17N2O14P3	CC1=CN(C(=O)NC1=O)C2CC(C(O2)COP(=O)(O)OP(=O)(O)OP(=O)(O)O)O	16	481.989	40	5	1	480.981	158.71	-80	-38	-9
TRUE	TRUE	56	2	TRUE		1-deoxy-D-xylulose 5-phosphate	dXP	443201	AJPADPZSRRUGHI	C11437	C5H11O7P	CC(=O)C(C(COP(=O)(O)O)O)O	8.81	214.024	40	10	1	213.016	97	-50	-18	-1
TRUE	TRUE	57	2	TRUE		erythrose 4-phosphate	E4P	122357	NGHMDNPXVRFFGS	C00279	C4H9O7P	C(C(C(C=O)O)O)OP(=O)(O)O	5.86	200.009	40	12	1	199.001	96.8	-40	-12	-5
TRUE	TRUE	58	2	TRUE		fructose 6-phosphate	F6P	69507	GSXOAOHZAIYLCY	C00085	C6H13O9P	C(C(C(C(C(=O)CO)O)O)O)OP(=O)(O)O	5.5	260.03	40	6	1	259.022	96.9	-30	-20	-11
TRUE	TRUE	59	2	TRUE		flavin adenine dinucleotide	FAD	643975	VWWQXMAJTJZDQX	C00016	C27H33N9O15P2	CC1=CC2=C(C=C1C)N(C3=NC(=O)NC(=O)C3=N2)CC(C(C(COP(=O)(O)OP(=O)(O)OCC4C(C(C(O4)N5C=NC6=C5N=CN=C6N)O)O)O)O)O	13.14	785.157	40	5	1	784.149	79	-60	-130	-1
						FAICAR	FAICAR	166760	ABCOOORLYAOBOZ	C04734	C10H15N4O9P	C1=NC(=C(N1C2C(C(C(O2)COP(=O)(O)O)O)O)NC=O)C(=O)N	0	366.058				365.05	78.9	-40	-35	-10
TRUE	TRUE	61	2	TRUE		fructose-1,6-diphosphate	FBP	10267	RNBGYGVWRKECFJ	C05378	C6H14O12P2	C(C1C(C(C(O1)(COP(=O)(O)O)O)O)O)OP(=O)(O)O	15.7	339.996	40	5	1	338.988	96.9	-35	-22	-11
						5-phosphoribosyl-N-formylglycineamidine	FGAM	154	PMCOGCVKOAOZQM	C04640	C8H16N3O8P	O=CNC/C(N)=N/C(O1)C(O)C(O)C1COP(O)(O)=O	0	313.068				312.06	78.9	-40	-35	-10
						5'-phosphoribosyl-N-formylglycineamide	FGAR	151	VDXLUNDMVKSKHO	C04376	C8H15N2O9P	C(C1C(C(C(O1)NC(=O)CNC=O)O)O)OP(=O)(O)O	0	314.052				313.044	78.9	-40	-35	-10
TRUE	TRUE	62	2	TRUE		flavin mononucleotide	FMN	643976	FVTCRASFADXXNN	C00061	C17H21N4O9P	CC1=CC2=C(C=C1C)N(C3=NC(=O)NC(=O)C3=N2)CC(C(C(COP(=O)(O)O)O)O)O	0	456.105	40	2	1	455.097	96.96	-35	-25	-10
TRUE	TRUE	60	2	TRUE		farnesyl diphosphate	FPP	445713	VWFJDQUYCIWHTN	C00448	C15H28O7P2	CC(=CCCC(=CCCC(=CCOP(=O)(O)OP(=O)(O)O)C)C)C	19.7	382.131	40	2	1	381.123	78.9	-50	-50	-5
TRUE	TRUE	63	2	TRUE		fumaric acid	FUM	444972	VZCYOOQTPOCHFL	C00122	C4H4O4	C(=CC(=O)O)C(=O)O	10.35	116.011	40	2	1	115.003	71	-5	-12	-13
TRUE	TRUE	65	2	TRUE		glucose-1-phosphate	G1P	65533	HXXFSFRBOHSIMQ	C00103	C6H13O9P	C(C1C(C(C(C(O1)OP(=O)(O)O)O)O)O)O	6.36	260.03	40	10	1	259.022	240.8	-30	-16	-15
C00668	TRUE	66	2	TRUE		glucose-6-phosphate	G6P	439284	NBSCHQHZLSJFNQ	C00668	C6H13O9P	C(C1C(C(C(C(O1)O)O)O)O)OP(=O)(O)O	5.4	260.03	40	8	1	259.022	97	-65	-18	-13
TRUE	TRUE	67	2	TRUE		glucosamine 1-phosphate	GA1P	188960	YMJBYRVFGYXULK	C06156	C6H14NO8P	C(C1C(C(C(C(O1)OP(=O)(O)O)N)O)O)O	2.4	259.046	40	2	1	258.038	78.9	-55	-42	-1
TRUE	TRUE	68	2	TRUE		glucosamine 6-phosphate	GA6P	439217	XHMJOUIAFHJHBW	C00352	C6H14NO8P	C(C1C(C(C(C(O1)O)N)O)O)OP(=O)(O)O	2.1	259.046	40	1	1	258.038	97	-45	-24	-5
TRUE	TRUE	69	2	TRUE		gamma-aminobutyric acid	GABA	119	BTCSSZJGUNDROE	C00334	C4H9NO2	C(CC(=O)O)CN	0.74	103.063	40	4	1	102.055	84	-35	-14	-7
TRUE	TRUE	183	2	TRUE		D-galactonic acid	GALACTON	128869	RGHNJXZEOKUKBD	C00880	C6H12O7	C(C(C(C(C(C(=O)O)O)O)O)O)O	2.1	196.058	40	6	1	195.05	129.01	-50	-18	-9
TRUE	TRUE	174	2	TRUE		D-galacturonic Acid	GALACTURON	439215	AEMOLEFTQBMNLQ	C00333	C6H10O7	C1(C(C(OC(C1O)O)C(=O)O)O)O	2	194.043	40	10	1	193.035	113	-20	-16	-5
TRUE	TRUE	70	2	TRUE		glycerinaldehye 3-phosphate	GAP	729	LXJXRIRHZLFYRP	C00661	C3H7O6P	C(C(C=O)O)OP(=O)(O)O	5.4	169.998	40	10	1	168.99	97.01	-30	-12	-5
						5'-phosphoribosylglycineamide	GAR	90657462	OBQMLSFOUZUIOB	C03838	C7H15N2O8P	O=C(CN)NC(O1)C(O)C(O)C1COP(O)(O)=O	0	286.057				285.049	78.9	-40	-35	-10
TRUE	TRUE	71	2	TRUE		guanosine diphosphate	GDP	135398619	QGWNDRXFNXRZMB	C00035	C10H15N5O11P2	C1=NC2=C(N1C3C(C(C(O3)COP(=O)(O)OP(=O)(O)O)O)O)NC(=NC2=O)N	13	443.024	40	20	1	442.016	78.85	-85	-70	-3
TRUE	TRUE	74	2	TRUE		geranylgeranyl pyrophosphate	GGPP	447277	OINNEUNVOZHBOX	C00353	C20H36O7P2	CC(=CCCC(=CCCC(=CCCC(=CCOP(=O)(O)OP(=O)(O)O)C)C)C)C	19.2	450.194	40	3	1	449.186	78.8	-65	-68	-35
TRUE	TRUE	75	2	TRUE		L-glutamic acid	GLA	33032	WHUUTDBJXJRKMK	C00025	C5H9NO4	C(CC(=O)O)C(C(=O)O)N	2.1	147.053	40	25	1	146.045	102	-80	-18	-9
TRUE	TRUE	76	2	TRUE		glycerophosphoric acid	GLC3P	754	AWUCVROLDVIAJX	C00093	C3H9O6P	C(C(COP(=O)(O)O)O)O	6.82	172.014	40	25	1	171.006	78.8	-45	-24	-1
TRUE	TRUE	77	2	TRUE		L-glutamine	GLN	5961	ZDXPYRJPNDTMRX	C00064	C5H10N2O3	C(CC(=O)N)C(C(=O)O)N	0.6	146.069	40	2	1	145.061	108.9	-30	-18	-5
TRUE	TRUE	182	2	TRUE		gluconic acid	GLUCON	10690	RGHNJXZEOKUKBD	C00257	C6H12O7	C(C(C(C(C(C(=O)O)O)O)O)O)O	2.05	196.058	40	20	1	195.05	129	-50	-18	-9
TRUE	TRUE	175	2	TRUE		D-glucuronic Acid	GLUCURON	94715	AEMOLEFTQBMNLQ	C00191	C6H10O7	C1(C(C(OC(C1O)O)C(=O)O)O)O	1.9	194.042	40	5	1	193.034	113.01	-20	-16	-5
TRUE	TRUE	79	2	TRUE		glycine	GLY	750	DHMQDGOQFOQNFH	C00037	C2H5NO2	C(C(=O)O)N	0.8	75.032	40	2	1	74.024	74	-36	-13	-3
TRUE	TRUE	173	2	TRUE		glycolic acid	GLYCOLATE	757	AEMRFAOFKBGASW	C00160	C2H4O3	C(C(=O)O)O	2.5	76.016	40	5	1	75.008	47	-30	-14	-13
						glyoxylic acid	GLYOX	760	HHLFWLYXYJOTON	C00048	C2H2O3	C(=O)C(=O)O	2	74.000394				73	45	-25	-25	-10
TRUE	TRUE	80	2	TRUE		guanosine-5'-monophosphate	GMP	135398631	RQFCJASXJCIDSX	C00144	C10H14N5O8P	C1=NC2=C(N1C3C(C(C(O3)COP(=O)(O)O)O)O)N=C(NC2=O)N	8.13	363.058	40	5	1	362.05	78.92	-65	-66	-5
TRUE	TRUE	72	2	TRUE		geranyl diphosphate	GPP	445995	GVVPGTZRZFNKDS	C00341	C10H20O7P2	CC(=CCCC(=CCOP(=O)(O)OP(=O)(O)O)C)C	18	314.068	40	2	1	313.06	78.9	-65	-46	-1
TRUE	TRUE	81	2	TRUE		glutathione	GSH	124886	RWSXRVCMGQZWBV	C00051	C10H17N3O6S	C(CC(=O)NC(CS)C(=O)NCC(=O)O)C(C(=O)O)N	4	307.084	40	2	1	306.076	143	-5	-26	-7
TRUE	TRUE	82	2	TRUE		glutathione disulfide	GSSG	65359	YPZRWBKMTBYPTK	C00127	C20H32N6O12S2	C(CC(=O)NC(CSSCC(C(=O)NCC(=O)O)NC(=O)CCC(C(=O)O)N)C(=O)NCC(=O)O)C(C(=O)O)N	8.9	612.152	40	25	1	611.144	306.1	-35	-34	-7
TRUE	TRUE	83	2	TRUE		guanosine triphosphate	GTP	135398633	XKMLYUALXHKNFT	C00044	C10H16N5O14P3	C1=NC2=C(N1C3C(C(C(O3)COP(=O)(O)OP(=O)(O)OP(=O)(O)O)O)O)NC(=NC2=O)N	16	522.991	40	25	1	521.983	158.79	-90	-48	-9
TRUE	TRUE	84	2	TRUE		guanosine	Guanosine	135398635	NYHBQMYGNKIUIF	C00387	C10H13N5O5	C1=NC2=C(N1C3C(C(C(O3)CO)O)O)NC(=NC2=O)N	1.4	283.092	40	25	1	282.084	149.93	-80	-26	-9
TRUE	TRUE	78	2	TRUE		hexose_sum	Hexoses				C6H12O6	O[C@@H]1[C@H](O)[C@@H](O)[C@H](O)[C@@H](CO)O1	0.8	180.064	40	2	1	179.056	89	-50	-12	-13
TRUE	TRUE	86	2	TRUE		L-histidine	HIS	6274	HNDVDQJCIGZPNO	C00135	C6H9N3O2	C1=C(NC=N1)CC(C(=O)O)N	0.5	155.069	40	10	1	154.061	93	-40	-52	-9
TRUE	TRUE	87	2	TRUE		(2E)-4-hydroxy-3-methylbut-2-enyl diphosphate	HMBPP	21597501	MDSIZRKJVDMQOQ	C11811	C5H12O8P	C/C(CO)=C\COP(O)(OP(O)(O)=O)=O	13.3	262.007	40	4	1	261	79	-50	-35	-13
TRUE	TRUE	91	2	TRUE		hydroxymethylglutaryl-CoA	HMG-CoA	445127	CABVTRNMFUVUDM	C00356	C27H44N7O20P3S	CC(C)(COP(=O)(O)OP(=O)(O)OCC1C(C(C(O1)N2C=NC3=C2N=CN=C3N)O)OP(=O)(O)O)C(C(=O)NCCC(=O)NCCSC(=O)CC(C)(CC(=O)O)O)O	18.5	911.157	40	2	1	910.149	407.9	-220	-52	-27
TRUE	TRUE	92	2	TRUE		inosine 5'-monophosphate	IMP	135398640	GRSZFWQUAKGDAV	C00130	C10H13N4O8P	C1=NC(=O)C2=C(N1)N(C=N2)C3C(C(C(O3)COP(=O)(O)O)O)O	8.28	348.047	40	2	1	347.039	134.8	-70	-38	-7
TRUE	TRUE	93	2	TRUE		D-myo-inositol trikisphosphates (sum)	IP3_sum				C5H15O15P3	O=P(O)(O)OC1C(OP(O)(O)=O)C(O)C(O)C(OP(O)(O)=O)C1O	17.4	419.962	40	5	1	418.954	320.8	-25	-28	-21
TRUE	TRUE	94	2	TRUE		D-myo-inositol tetrakisphosphates (sum)	IP4_sum	25245205	FFZGWHDHUIRNPY		C6H16O18P4	O=P(O)(O)OC1C(OP(O)(O)=O)C(OP(O)(O)=O)C(O)C(OP(O)(O)=O)C1O	19.2	499.299	40	2	1	498.291	400.7	-100	-30	-27
TRUE	TRUE	95	2	TRUE		D-myo-inositol pentakisphosphates (sum)	IP5_sum	127296	UPHPWXPNZIOZJL		C6H17O21P5	O=P(O)(O)OC1C(OP(O)(O)=O)C(OP(O)(O)=O)C(O)C(OP(O)(O)=O)C1OP(O)(O)=O	19.2	579.895	40	2	1	578.887	480.6	-25	-32	-31
TRUE	TRUE	96	2	TRUE		phytic acid	IP6	890	IMQLKJBTEOYOSI	C01204	C6H18O24P6	C1(C(C(C(C(C1OP(=O)(O)O)OP(=O)(O)O)OP(=O)(O)O)OP(=O)(O)O)OP(=O)(O)O)OP(=O)(O)O	19.6	659.861	40	7	1	658.853	560.7	-145	-38	-31
TRUE	TRUE	97	2	TRUE		Isopentenyl pyrophosphate	IPPP	1195	NUHSROFQTUXZQQ	C00129	C5H12O7P2	CC(=C)CCOP(=O)(O)OP(=O)(O)O	12.83	246.006	40	10	1	244.998	78.9	-15	-44	-37
TRUE	TRUE	98	2	TRUE		isocitric acid	ISOCIT	1198	ODBLHEXUDAPZAU	C00311	C6H8O7	C(C(C(C(=O)O)O)C(=O)O)C(=O)O	14.39	192.027	40	2	1	191.019	73	-45	-28	-31
TRUE	TRUE	99	2	TRUE		isovaleryl-coenzyme A	ISOVAL-CoA	165435	UYVZIWWBJMYRCD	C02939	C26H44N7O17P3S	CC(C)CC(=O)SCCNC(=O)CCNC(=O)C(C(C)(C)COP(=O)(O)OP(=O)(O)OCC1C(C(C(O1)N2C=NC3=C2N=CN=C3N)O)OP(=O)(O)O)O	19.2	851.173	40	25	1	850.165	407.9	-240	-58	-19
TRUE	TRUE	176	2	TRUE		2-keto-3-deoxy-6-phosphogluconate	KDPG	3080745	OVPRPPOVAXRCED	C04442	C6H11O9P	C(C(C(COP(=O)(O)O)O)O)C(=O)C(=O)O	5.78	258.014	40	10	1	257.006	97	-30	-20	-9
TRUE	TRUE	100	2	TRUE		lactic acid	LAC	612	JVTAAEKCZFNVCJ	C00186	C3H6O3	CC(C(=O)O)O	3.8	90.032	40	25	1	89.024	42.9	-15	-12	-5
TRUE	TRUE	101	2	TRUE		L-leucine+L-isoleucine (sum)	LEU+ILE	6106	ROHFNLRQFUQHCH	C00407	C6H13NO2	CC(C)CC(C(=O)O)N	1	131.095	40	2	1	261.3	130.2	-30	-20	-4
TRUE	TRUE	101	2	TRUE		L-leucine+L-isoleucine (sum)	LEU+ILE	6106	ROHFNLRQFUQHCH	C00407	C6H13NO2	CC(C)CC(C(=O)O)N	1	131.095	40	2	1	130.087	87.05	-25	-25	-10
TRUE	TRUE	102	2	TRUE		L-lysine	LYS	5962	KDXKERNSBIXSRK	C00047	C6H14N2O2	C(CCN)CC(C(=O)O)N	0.7	146.106	40	10	1	145.098	99	-65	-14	-5
TRUE	TRUE	103	2	TRUE		malic acid	MAL	92824	BJEPYKJPYRNKOW	C00711	C4H6O5	C(C(C(=O)O)O)C(=O)O	9.8	134.022	40	25	1	133.014	115	-20	-16	-5
TRUE	TRUE	105	2	TRUE		malonyl-CoA	Malo-CoA	644066	LTYOQGRJFJAKNA	C00083	C24H38N7O19P3S	CC(C)(COP(=O)(O)OP(=O)(O)OCC1C(C(C(O1)N2C=NC3=C2N=CN=C3N)O)OP(=O)(O)O)C(C(=O)NCCC(=O)NCCSC(=O)CC(=O)O)O	18.6	853.116	40	2	1	852.108	408	-185	-58	-21
TRUE	TRUE	106	2	TRUE		2C-methyl-D-erythritol 2,4-cyclodiphosphate	MEcPP	126747	SFRQRNJMIIUYDI	C11453	C5H12O9P2	CC1(C(COP(=O)(OP(=O)(O1)O)O)O)CO	10.9	277.996	40	2	1	276.988	79	-45	-64	-37
TRUE	TRUE	26	2	TRUE		3-methylcrotonyl CoA	MeCrot-CoA	99	BXIPALATIYNHJN	C03069	C26H42N7O17P3S	CC(=CC(=O)SCCNC(=O)CCNC(=O)C(C(C)(C)COP(=O)(O)OP(=O)(O)OCC1C(C(C(O1)N2C=NC3=C(N=CN=C32)N)O)OP(=O)(O)O)O)C	19.1	849.157	40	2	1	848.149	407.8	-185	-58	-21
TRUE	TRUE	107	2	TRUE		methyl-D-erythritol Phosphate	MEP	443198	XMWHRVNVKDKBRG	C11434	C5H13O7P	CC(CO)(C(COP(=O)(O)O)O)O	6.8	216.04	40	20	1	215.032	78.9	-40	-56	-9
TRUE	TRUE	108	2	TRUE		methionine	MET	876	FFEARJCKVFRZRR	C01733	C5H11NO2S	CSCCC(C(=O)O)N	0.8	149.051	40	5	1	148.043	47	-45	-24	-5
TRUE	TRUE	109	2	TRUE		mevalonic acid	MEVA	439230	KJTLQQUUPVSXIM	C00418	C6H10O3	CC(CCO)(CC(=O)O)O	6.64	148.074	40	10	1	147.066	59.1	-45	-20	-7
TRUE	TRUE	110	2	TRUE		mevalonate-P	MEVA5P	439400	OKZYCXHTTZZYSK	C01107	C6H13O7P	CC(CCOP(=O)(O)O)(CC(=O)O)O	11.2	228.04	40	20	1	227.032	97	-30	-35	-10
C01143	TRUE	111	2	TRUE		mevalonate-5PP	MEVA5PP	439418	SIGQQUBJQXSAMW	C01143	C6H14O10P2	CC(CCOP(=O)(O)OP(=O)(O)O)(CC(=O)O)O	15.9	308.006	40	20	1	306.998	78.9	-25	-35	-13
TRUE	TRUE	112	2	TRUE		methylmalonyl coa	MM-CoA	123909	MZFOKIKEPGUZEN	C00683	C25H40N7O19P3S	CC(C(=O)O)C(=O)SCCNC(=O)CCNC(=O)C(C(C)(C)COP(=O)(O)OP(=O)(O)OCC1C(C(C(O1)N2C=NC3=C2N=CN=C3N)O)OP(=O)(O)O)O	17.8	867.131	40	2	1	866.123	408	-185	-58	-21
TRUE	TRUE	119	2	TRUE		nicotinic acid	NA	938	PVNIIMVLHYAWGP	C00253	C6H5NO2	C1=CC(=CN=C1)C(=O)O	6.97	123.032	40	4	1	122.024	77.9	-55	-16	-13
TRUE	TRUE	113	2	TRUE		nicotinate mononucleotide	NAAM	121991	JOUIQRNQJGXQDC	C01185	C11H14NO9P	C1=CC(=C[N+](=C1)C2C(C(C(O2)COP(=O)(O)O)O)O)C(=O)[O-]	0	335.041	40	15	1	334.033	78.9	-25	-16	-13
TRUE	TRUE	114	2	TRUE		NAD+	NAD+	5892	BAWFJGJZGIEFAR	C00003	C21H27N7O14P2	C1=CC(=C[N+](=C1)C2C(C(C(O2)COP(=O)([O-])OP(=O)(O)OCC3C(C(C(O3)N4C=NC5=C4N=CN=C5N)O)O)O)O)C(=O)N	5	663.109	40	20	1	662.101	540.1	-45	-22	-15
TRUE	TRUE	115	2	TRUE		NADH	NADH	439153	BOPGDPNILDQYTO	C00004	C21H29N7O14P2	C1C=CN(C=C1C(=O)N)C2C(C(C(O2)COP(=O)(O)OP(=O)(O)OCC3C(C(C(O3)N4C=NC5=C4N=CN=C5N)O)O)O)O	11.4	665.125	40	4	1	664.117	78.9	-100	-124	-1
TRUE	TRUE	116	2	TRUE		NADP+	NADP+	5886	XJLXINKUBYWONI	C00006	C21H29N7O17P3+	C1=CC(=C[N+](=C1)C2C(C(C(O2)COP(=O)(O)OP(=O)(O)OCC3C(C(C(O3)N4C=NC5=C4N=CN=C5N)OP(=O)(O)O)O)O)O)C(=O)N	13.4	744.083	40	20	1	743.075	620	-55	-22	-17
TRUE	TRUE	117	2	TRUE		NADPH	NADPH	5884	ACFIXJIJDZMPPO	C00005	C21H30N7O17P3	C1C=CN(C=C1C(=O)N)C2C(C(C(O2)COP(=O)(O)OP(=O)(O)OCC3C(C(C(O3)N4C=NC5=C4N=CN=C5N)OP(=O)(O)O)O)O)O	16.3	745.091	40	2	1	744.083	79	-110	-118	-3
TRUE	TRUE	118	2	TRUE		nicotinamide	nicotinamide	936	DFPAKSUCGFBDDF	C00153	C6H6N2O	C1=CC(=CN=C1)C(=O)N	0	122.048	40	7	1	121.04	76.9	-40	-16	-9
TRUE	TRUE	120	2	TRUE		nicotinamide mononucleotide	NMN	14180	DAYLJWODMCOQEW	C00455	C11H15N2O8P	C1=CC(=C[N+](=C1)C2C(C(C(O2)COP(=O)(O)[O-])O)O)C(=O)N	0	334.057	40	2	1	333.049	78.9	-50	-30	-13
TRUE	TRUE	121	2	TRUE		L-ornithine	ORN	6262	AHLPHDHHMVZTML	C00077	C5H12N2O2	C(CC(C(=O)O)N)CN	0.6	132.09	40	20	1	131.082	82.9	-60	-20	-5
TRUE	TRUE	122	2	TRUE		orotic acid	ORO	967	PXQPEWDEAKTCGB	C00295	C5H4N2O4	C1=C(NC(=O)NC1=O)C(=O)O	4.8	156.017	40	2	1	155.009	110.7	-25	-12	-5
TRUE	TRUE	123	2	TRUE		orotidylic acid	ORO5P	160617	KYOBSHFOBAOFBF	C01103	C10H13N2O11P	C1=C(N(C(=O)NC1=O)C2C(C(C(O2)COP(=O)(O)O)O)O)C(=O)O	15.8	368.026	40	25	1	367.018	78.9	-50	-78	-1
TRUE	TRUE	161	2	TRUE		oxaloacetic acid	Oxalic acid_1	970	KHPXUQMNIQBQEV	C00036	C2H2O4	C(C(=O)C(=O)O)C(=O)O	10.5	132.006	40	5	1	130.998	87	-35	-10	-17
TRUE	TRUE	162	2	TRUE		oxaloacetic acid_2	Oxalic acid_2	970	KHPXUQMNIQBQEV	C00036	C2H2O4	C(C(=O)C(=O)O)C(=O)O	10.5	132.006	40	2	1	130.998	43	-35	-18	-11
TRUE	TRUE	124	2	TRUE		D-pantothenic acid	PAN	6613	GHOKWGTUZJEAQD	C00864	C9H17NO5	CC(C)(CO)C(C(=O)NCCC(=O)O)O	7	219.111	40	2	1	218.103	88.1	-55	-18	-5
TRUE	TRUE	187	2	TRUE		O-phosphoethanolamine	PEA	1015	SUHOOTKUPISOBE	C00346	C2H8NO4P	C(COP(=O)(O)O)N	1.4	141.019	40	7	1	140.011	79	-240	-38	-13
TRUE	TRUE	189	2	TRUE		sum of valeric acid, isovaleric, anteisovaleric acid	pentanoates				C5H10O2	OC(CCCC)=O	10.69	102.068	40	4	1	101.06	101.07	-50	-10	-5
TRUE	TRUE	126	2	TRUE		phosphoenolpyruvate	PEP	1005	DTBNBXWJWCWCIK	C00074	C3H5O6P	C=C(C(=O)O)OP(=O)(O)O	13.86	167.982	40	2	1	166.974	78.8	-20	-16	-9
TRUE	TRUE	127	2	TRUE		phenylalanine	PHE	6140	COLNVLDHVKWLRT	C00079	C9H11NO2	C1=CC=C(C=C1)CC(C(=O)O)N	1.5	165.079	40	20	1	164.071	103	-55	-24	-5
TRUE	TRUE	128	2	TRUE		phosphate	phosphate	1061	NBIIXXVUZAFLBC	C00009	H2PO4-	O=P(O[O-])=O.[HH]	4	96.9696	40	4	1	96.9	78.9	-40	-18	-15
						phosphoribosylamine	PRA	150	SKCBPEVYGOQGJN	C03090	C5H12NO7P	NC(O1)C(O)C(O)C1COP(O)(O)=O	0	228.027				227.019	78.9	-40	-35	-10
TRUE	TRUE	129	2	TRUE		L-proline	PRO	145742	ONIBWKKTOPOVIA	C00148	C5H9NO2	C1CC(NC1)C(=O)O	0.6	115.063	40	20	1	114.055	86	-55	-18	-3
TRUE	TRUE	131	2	TRUE		PRPP	PRPP	7339	PQGCEDQWHSBAJP	C00119	C5H13O14P3	C(C1C(C(C(O1)OP(=O)(O)OP(=O)(O)O)O)O)OP(=O)(O)O	17.5	389.952	40	11	1	388.944	176.8	-55	-28	-9
TRUE	TRUE	132	2	TRUE		pyruvic acid	PYR	1060	LCTONWCANYUPML	C00022	C3H4O3	CC(=O)C(=O)O	4.9	88.016	40	20	1	87.008	43	-30	-12	-1
TRUE	TRUE	133	2	TRUE		quinic acid	QUIN	6508	AAWZDTNXLSGCEK	C00296	C7H12O6	C1C(C(C(CC1(C(=O)O)O)O)O)O	2.65	192.063	40	5	1	191.055	85	-50	-28	-13
C00620	TRUE	134	2	TRUE		ribose-1-phosphate	R1P	439236	YXJDFQJKERBOBM	C00620	C5H11O8P	C(C1C(C(C(O1)OP(=O)(O)O)O)O)O	7.7	230.019	40	2	1	229.011	211	-50	-14	-3
TRUE	TRUE	135	2	TRUE		ribose phosphate	R5P	77982	PPQRONHOSHZGFQ	C00117	C5H11O8P	C(C(C(C(C=O)O)O)O)OP(=O)(O)O	6.33	230.019	40	4	1	229.011	96.81	-35	-20	-5
TRUE	TRUE	179	2	TRUE		D-ribonic acid	RA	5460677	QXKAIJAYHKCRRA	C01685	C5H10O6	C(C(C(C(C(=O)O)O)O)O)O	2.3	166.047	40	20	1	165.039	75	-45	-20	-35
TRUE	TRUE	136	2	TRUE		D-ribulose 1,5-Bisphosphate	RIB1,5 BP	123658	YAHZABJORDUQGO	C01182	C5H12O11P2	C(C(C(C(=O)COP(=O)(O)O)O)O)OP(=O)(O)O	15.7	309.985	40	20	1	308.977	97	-35	-20	-27
TRUE	TRUE	137	2	TRUE		ribulose 5-phosphate+xylolose 5-phosphate (sum)	RIBU5P+XU5P	439184	FNZLKVNUWIIPSJ	C00199	C5H11O8P	C(C(C(C(=O)CO)O)O)OP(=O)(O)O	6.5	230.019	40	7	1	229.011	96.8	-45	-18	-15
TRUE	TRUE	138	2	TRUE		sedoheptulose 1,7-bisphosphate	S1,7BP	164735	OKHXOUGRECCASI	C00447	C7H16O13P2	C(C(C(C(C(C(=O)COP(=O)(O)O)O)O)O)O)OP(=O)(O)O	15.54	370.006	40	6	1	368.998	97	-35	-20	-27
TRUE	TRUE	139	2	TRUE		sedoheptulose 7-phosphate	S7P	165007	JDTUMPKOJBQPKX	C05382	C7H15O10P	C(C(C(C(C(C(=O)CO)O)O)O)O)OP(=O)(O)O	6.6	290.04	40	10	1	289.032	97	-50	-22	-5
TRUE	TRUE	140	2	TRUE		S-adenosylhomocysteine	SAH	439155	ZJUKTBDSGOFHSH	C00021	C14H20N6O5S	C1=NC(=C2C(=N1)N(C=N2)C3C(C(C(O3)CSCCC(C(=O)O)N)O)O)N	0.83	384.122	40	200	1	383.114	133.9	-80	-36	-7
						SAICAR	SAICAR	160666	NAQGHJTUZRHGAC	C04823	C13H19N4O12P	C1=NC(=C(N1C2C(C(C(O2)COP(=O)(O)O)O)O)N)C(=O)NC(CC(=O)O)C(=O)O	0	454.074				453.066	78.9	-40	-35	-10
TRUE	TRUE	141	2	TRUE		L-serine	SER	5951	MTCFGRXMJLQNBG	C00065	C3H7NO3	C(C(C(=O)O)N)O	0.8	105.043	40	5	1	104.035	74	-20	-16	-3
TRUE	TRUE	142	2	TRUE		shikimic acid	SHIK	8742	JXOHGGNKMLTUBP	C00493	C7H10O5	C1C(C(C(C=C1C(=O)O)O)O)O	2.5	174.053	40	2	1	173.045	92.9	-15	-20	-5
TRUE	TRUE	144	2	TRUE		succinic acid	SUC	1110	KDYFGRWQOYBRFD	C00042	C4H6O4	C(CC(=O)O)C(=O)O	9.9	118.027	40	20	1	117.019	73	-25	-16	-7
TRUE	TRUE	145	2	TRUE		succinyl-coenzyme A	Succ-CoA	92133	VNOYUJKHFWYWIR	C00091	C25H40N7O19P3S	CC(C)(COP(=O)(O)OP(=O)(O)OCC1C(C(C(O1)N2C=NC3=C2N=CN=C3N)O)OP(=O)(O)O)C(C(=O)NCCC(=O)NCCSC(=O)CCC(=O)O)O	19	867.131	40	25	1	866.123	407.6	-260	-56	-25
TRUE	TRUE	143	2	TRUE		sulfate	sulfate	1117	QAOWNCQODCNURD	C00059	HSO4-	O=S(O)([O-])=O	10.2	96.9601	40	2	1	97	97	-40	-18	-15
TRUE	TRUE	147	2	TRUE		L-threonine	THR	6288	AYFVYJQAPQTCCC	C00188	C4H9NO3	CC(C(C(=O)O)N)O	0.8	119.058	40	2	1	118.05	73.9	-25	-18	-3
TRUE	TRUE	181	2	TRUE		trigalacturonic acid	TRIGALACTURON	4472903	LCLHHZYHLXDRQG	not available	C18H26O19	C1(C(C(OC(C1O)OC2C(C(C(OC2C(=O)O)OC3C(C(C(OC3C(=O)O)O)O)O)O)O)C(=O)O)O)O	13.77	546.107	40	20	1	545.099	369	-105	-24	-25
TRUE	TRUE	148	2	TRUE		L-tryptophan	TRP	6305	QIVBCDIJIAJPQS	C00078	C11H12N2O2	C1=CC=C2C(=C1)C(=CN2)CC(C(=O)O)N	3.4	204.09	40	10	1	203.082	116.2	-50	-22	-7
TRUE	TRUE	149	2	TRUE		L-tyrosine	TYR	6057	OUYCCCASQSFEME	C00082	C9H11NO3	C1=CC(=CC=C1CC(C(=O)O)N)O	1	181.074	40	20	1	180.066	118.9	-60	-24	-5
TRUE	TRUE	180	2	TRUE		uric acid	UA	1175	LEHOTFFKMJEONL	C00366	C5H4N4O3	C12=C(NC(=O)N1)NC(=O)NC2=O	2.7	168.028	40	4	1	167.02	124	-45	-20	-7
TRUE	TRUE	150	2	TRUE		uridine 5'-diphosphate	UDP	6031	XCCTYIAWTASOJW	C00015	C9H14N2O12P2	C1=CN(C(=O)NC1=O)C2C(C(C(O2)COP(=O)(O)OP(=O)(O)O)O)O	13.1	404.002	40	2	1	402.994	78.79	-75	-68	-3
TRUE	TRUE	151	2	TRUE		UDP-glucose	UDP-glc	8629	HSCJRCZFDFQWRP	C00029	C15H24N2O17P2	C1=CN(C(=O)NC1=O)C2C(C(C(O2)COP(=O)(O)OP(=O)(O)OC3C(C(C(C(O3)CO)O)O)O)O)O	10.2	566.055	40	2	1	565.047	323	-125	-36	-11
TRUE	TRUE	152	2	TRUE		UDP-N-acetyl-alpha-D-glucosamine	UDP-NAcGA	445675	LFTYTUAZOPRMMI	C00043	C17H27N3O17P2	CC(=O)NC1C(C(C(OC1OP(=O)(O)OP(=O)(O)OCC2C(C(C(O2)N3C=CC(=O)NC3=O)O)O)CO)O)O	10.23	607.082	40	5	1	606.074	384.8	-175	-36	-25
TRUE	TRUE	153	2	TRUE		uridine 5'-monophosphate	UMP	6030	DJJCXFVJDGTHFX	C00105	C9H13N2O9P	C1=CN(C(=O)NC1=O)C2C(C(C(O2)COP(=O)(O)O)O)O	7.8	324.036	40	5	1	323.028	79	-65	-68	-5
TRUE	TRUE	154	2	TRUE		uridine	Uridine	6029	DRTQHJPVMGBUCF	C00299	C9H12N2O6	C1=CN(C(=O)NC1=O)C2C(C(C(O2)CO)O)O	0.81	244.07	40	5	1	243.062	109.88	-65	-22	-5
TRUE	TRUE	155	2	TRUE		uridine 5'-triphosphate	UTP	6133	PGAVKCOVUIYSFO	C00075	C9H15N2O15P3	C1=CN(C(=O)NC1=O)C2C(C(C(O2)COP(=O)(O)OP(=O)(O)OP(=O)(O)O)O)O	16.2	483.969	40	25	1	482.961	158.76	-90	-38	-9
TRUE	TRUE	156	2	TRUE		L-valine	VAL	6287	KZSNJWFQEVHDMF	C00183	C5H11NO2	CC(C)C(C(=O)O)N	0.8	117.079	40	2	1	233.3	116	-25	-10	-5
TRUE	TRUE	156	2	TRUE		L-valine	VAL	6287	KZSNJWFQEVHDMF	C00183	C5H11NO2	CC(C)C(C(=O)O)N	0.8	117.079	40	2	1	116.071	70	-25	-20	-10
TRUE	TRUE	157	2	TRUE		xanthosine monophosphate	XAN5P	73323	DCTLYFZHFGENCW	C00655	C10H13N4O9P	C1=NC2=C(N1C3C(C(C(O3)COP(=O)(O)O)O)O)NC(=O)NC2=O	12.9	364.042	40	5	1	363.034	151.1	-60	-36	-5
						tetrahydrofolic acid	THF	135444742	MSTNYGQPCMXVAQ	C00101	C19H23N7O6	C1C(NC2=C(N1)N=C(NC2=O)N)CNC3=CC=C(C=C3)C(=O)NC(CCC(=O)O)C(=O)O	0	445.171				444.163	176.1	-40	-35	-10
						folic acid	Folate	135398658	OVBPIULPVIDEAO	C00504	C19H19N7O6	C1=CC(=CC=C1C(=O)NC(CCC(=O)O)C(=O)O)NCC2=CN=C3C(=N2)C(=O)NC(=N3)N	12.3	441.14				440.132	311.1	-40	-35	-10
						5-formyltetrahydrofolic acid	5-Formyl-THF	135403648	VVIAGPKUTFNRDU	C00440	C20H23N7O7	C1C(N(C2=C(N1)N=C(NC2=O)N)C=O)CNC3=CC=C(C=C3)C(=O)NC(CCC(=O)O)C(=O)O	0	473.166				472.158	315.1	-40	-35	-10
