# Supplementary material for: Machine Learning-Based Metabolic Pattern Recognition Predicts Mode of Action for Anti-Cancer Drug Candidates
Source: Research Square preprint supplement (doi:10.21203/rs.3.rs-3494185/v1), 2024-01-26
Supplement: Supplementary file 6 [file e26419d4d413b63936ba011a.xlsx]

## Sheet: Training
Table S3. Sum-normalized raw data (peak area) of training and prediction compounds
Sample Name	label	2,3-cAMP	2PG	2PGA	3,5-cAMP	3DeHy-SHIK	3-OH-PYR	3PGA	5Me-THF	6PG	8OH-COPA-PP	AcAc-CoA	AcCoA	ACT	Adenosine	Adenylo-Suc	ADP	ADP-glucose	ADPPR	ADPR	AICAR	AIR	2-OG	ALA	ALLANTOATE	ALT	AMP	ARG	ASC	ASN	ASP	ATP	CA	CAIR	CarbamoylAla	CDP	CDP-CHOL	CDP-ME	CDP-MEP	cGMP	chloride	CHOR	CHOR-H2O	CIT	CITRUL	CMP	CoA	CREA	CREA-P
CPLXI_METF_48h_01	METF_48h	-0.17023	#VALUE!	-2.4719	-2.61712	#VALUE!	1.73968	-1.4431	#VALUE!	-3.49498	#VALUE!	-4.43558	0.0766171	-1.16712	0.418868	3.31403	0.664351	-0.252794	-0.131284	4.62071	#VALUE!	#VALUE!	-0.0537091	#VALUE!	-6.10092	0.319525	1.45955	0.882732	#VALUE!	#VALUE!	-0.85876	-0.0801977	-6.21751	#VALUE!	#VALUE!	-2.1624	4.30225	#VALUE!	#VALUE!	#VALUE!	#VALUE!	#VALUE!	#VALUE!	-0.20472	0.492045	-0.222883	0.781101	0.710231	-5.1735
CPLXI_METF_48h_02	METF_48h	-0.315024	#VALUE!	-2.0423	-2.56472	#VALUE!	0.733831	-1.25127	#VALUE!	-3.49672	#VALUE!	-3.0055	0.0189575	-1.10874	-0.404886	3.29621	0.595885	-0.473458	-0.163901	4.52285	#VALUE!	#VALUE!	-0.157038	#VALUE!	-5.93611	1.19061	1.9296	1.01861	#VALUE!	#VALUE!	-0.696912	-0.863221	-6.18373	#VALUE!	#VALUE!	-2.46985	4.272	#VALUE!	#VALUE!	#VALUE!	#VALUE!	#VALUE!	#VALUE!	-0.0782023	0.682388	-0.0397195	0.950551	0.94123	-5.36974
CPLXI_METF_48h_03	METF_48h	-0.257891	#VALUE!	-1.63443	-2.38521	#VALUE!	0.94878	-1.00387	#VALUE!	-3.15389	#VALUE!	-3.06695	0.269596	-1.08662	0.346592	3.34924	0.564751	-0.331356	0.0967771	4.61407	#VALUE!	#VALUE!	-0.0852415	#VALUE!	-6.17063	0.838163	2.08514	0.871678	#VALUE!	#VALUE!	-1.03417	-0.433109	-6.45137	#VALUE!	#VALUE!	-2.62244	4.42432	#VALUE!	#VALUE!	#VALUE!	#VALUE!	#VALUE!	#VALUE!	-0.230262	0.651739	0.09929	0.562817	0.875524	-5.10729
CPLXI_METF_48h_04	METF_48h	0.0145087	#VALUE!	-1.19664	-2.01722	#VALUE!	0.729867	-0.976921	#VALUE!	-3.30436	#VALUE!	-3.99464	0.449893	-1.12273	-0.679456	3.42246	0.678016	-0.0751606	0.309356	4.66796	#VALUE!	#VALUE!	0.211341	#VALUE!	-5.19582	1.11082	2.06264	0.904871	#VALUE!	#VALUE!	-1.13699	-0.438137	-6.66635	#VALUE!	#VALUE!	-2.34873	4.53157	#VALUE!	#VALUE!	#VALUE!	#VALUE!	#VALUE!	#VALUE!	-0.221449	0.647145	0.35549	-1.09235	0.800083	-4.76152
CPLXI_METF_48h_05	METF_48h	-0.170541	#VALUE!	-1.98794	-2.64844	#VALUE!	0.805717	-1.31132	#VALUE!	-3.47713	#VALUE!	-3.1611	0.152021	-1.10216	-0.111698	2.94411	0.518991	-0.384065	-0.106196	4.57058	#VALUE!	#VALUE!	-0.215191	#VALUE!	-6.04995	0.460193	1.79294	0.835722	#VALUE!	#VALUE!	-0.966674	-0.419391	-6.67798	#VALUE!	#VALUE!	-2.5559	4.13319	#VALUE!	#VALUE!	#VALUE!	#VALUE!	#VALUE!	#VALUE!	-0.141564	0.338964	-0.129908	0.539063	0.748681	-5.56152
CPLXI_METF_48h_06	METF_48h	-0.349714	#VALUE!	-2.06158	-2.37346	#VALUE!	0.874142	-1.3971	#VALUE!	-3.69262	#VALUE!	-2.61265	-0.146876	-1.23643	0.722795	3.31735	0.664599	-0.315441	-0.541259	4.50788	#VALUE!	#VALUE!	-0.220795	#VALUE!	-5.25021	0.356652	1.88761	1.12637	#VALUE!	#VALUE!	-1.13645	-0.396285	-6.98147	#VALUE!	#VALUE!	-2.25611	4.49361	#VALUE!	#VALUE!	#VALUE!	#VALUE!	#VALUE!	#VALUE!	0.0431094	0.719356	-0.0326547	0.716771	1.007	-4.8877
CPLXI_ROTN_48h_01	ROTN_48h	0.303508	#VALUE!	-1.17892	-2.37495	#VALUE!	1.5484	-1.41701	#VALUE!	-1.52536	#VALUE!	-4.03521	0.876344	-1.8083	#VALUE!	1.84153	0.600066	1.2722	0.485676	5.68271	#VALUE!	#VALUE!	-1.43052	#VALUE!	#VALUE!	2.34409	1.99835	2.66672	#VALUE!	#VALUE!	-0.0630662	-0.537263	-5.04808	#VALUE!	#VALUE!	-1.84001	4.99606	#VALUE!	#VALUE!	#VALUE!	#VALUE!	#VALUE!	#VALUE!	-0.941663	2.15808	0.00904942	1.22925	2.8887	-4.20936
CPLXI_ROTN_48h_02	ROTN_48h	0.016296	#VALUE!	-1.6584	-2.33872	#VALUE!	2.09501	-1.6967	#VALUE!	-2.11454	#VALUE!	-3.49583	0.595571	-1.33275	#VALUE!	1.26376	0.640472	1.99261	-0.0492166	5.64828	#VALUE!	#VALUE!	-1.30732	#VALUE!	#VALUE!	2.1387	1.61075	2.68192	#VALUE!	#VALUE!	0.893869	-0.360884	-4.75312	#VALUE!	#VALUE!	-1.71005	4.95218	#VALUE!	#VALUE!	#VALUE!	#VALUE!	#VALUE!	#VALUE!	0.11559	2.08999	-0.172355	0.908643	2.26295	-4.14773
CPLXI_ROTN_48h_03	ROTN_48h	0.383649	#VALUE!	-1.29085	-2.4239	#VALUE!	2.21794	-1.92189	#VALUE!	-1.98234	#VALUE!	-4.31893	0.974327	-1.5965	#VALUE!	1.40377	0.715407	1.05389	0.210191	5.78799	#VALUE!	#VALUE!	-1.48572	#VALUE!	#VALUE!	1.71083	1.93364	2.65565	#VALUE!	#VALUE!	0.454848	-0.391458	-4.87286	#VALUE!	#VALUE!	-1.87927	5.11525	#VALUE!	#VALUE!	#VALUE!	#VALUE!	#VALUE!	#VALUE!	-0.451984	1.99718	-0.272248	0.742426	2.47493	-4.41287
CPLXI_ROTN_48h_04	ROTN_48h	0.42776	#VALUE!	-1.81656	-2.4322	#VALUE!	2.61788	-2.05275	#VALUE!	-2.01676	#VALUE!	-4.08898	1.03287	-1.31513	#VALUE!	1.69416	0.887868	1.89519	0.15593	5.75542	#VALUE!	#VALUE!	-1.76496	#VALUE!	#VALUE!	1.97745	1.90222	2.5919	#VALUE!	#VALUE!	0.40528	-0.308921	-5.30199	#VALUE!	#VALUE!	-1.67267	4.93977	#VALUE!	#VALUE!	#VALUE!	#VALUE!	#VALUE!	#VALUE!	-0.260561	1.55955	-0.343622	0.4087	1.05359	-4.24232
CPLXI_ROTN_48h_05	ROTN_48h	0.0388358	#VALUE!	-1.08068	-2.6477	#VALUE!	2.41356	-1.39167	#VALUE!	-1.38116	#VALUE!	-4.72121	0.471634	-1.20034	#VALUE!	0.901098	0.378091	1.14961	-0.171896	5.64157	#VALUE!	#VALUE!	-1.22567	#VALUE!	#VALUE!	2.29911	0.474168	2.94268	#VALUE!	#VALUE!	0.893883	-0.234265	-3.85233	#VALUE!	#VALUE!	-1.53521	4.88714	#VALUE!	#VALUE!	#VALUE!	#VALUE!	#VALUE!	#VALUE!	0.319194	1.85055	-0.518745	0.140982	1.55837	-2.74808
CPLXI_ROTN_48h_06	ROTN_48h	0.341328	#VALUE!	-1.74367	-2.1891	#VALUE!	2.897	-1.92147	#VALUE!	-1.95949	#VALUE!	-4.22057	0.971754	-1.50127	#VALUE!	1.87376	0.754287	1.8977	0.0731141	5.78276	#VALUE!	#VALUE!	-1.59393	#VALUE!	#VALUE!	1.80471	1.60981	2.81894	#VALUE!	#VALUE!	0.573865	-0.331786	-5.15524	#VALUE!	#VALUE!	-1.7999	4.86	#VALUE!	#VALUE!	#VALUE!	#VALUE!	#VALUE!	#VALUE!	-0.150758	1.8979	-0.398546	0.380047	1.87699	-4.18534
CPLXII_MALO_48h_01	MALO_48h	0.430604	#VALUE!	-1.33371	-1.01094	#VALUE!	6.83656	-1.09693	#VALUE!	0.161708	#VALUE!	-1.34481	-0.10499	-1.78702	-0.0720255	-1.83124	0.948429	1.86493	-0.74818	0.609733	#VALUE!	#VALUE!	-1.70608	#VALUE!	-6.46083	0.669068	1.78606	1.32696	#VALUE!	#VALUE!	0.189343	0.0859273	-6.11475	#VALUE!	#VALUE!	-1.23198	2.72858	#VALUE!	#VALUE!	#VALUE!	#VALUE!	#VALUE!	#VALUE!	-0.0423457	0.764354	0.181558	0.112707	1.12131	-3.25652
CPLXII_MALO_48h_02	MALO_48h	0.521827	#VALUE!	-1.37935	-1.00812	#VALUE!	6.83773	-1.15673	#VALUE!	0.265007	#VALUE!	-1.66475	0.259711	-1.97788	-0.417473	-3.54126	0.767852	2.0779	-0.423823	-0.0182101	#VALUE!	#VALUE!	-2.11706	#VALUE!	-6.69206	1.05594	0.987032	1.16402	#VALUE!	#VALUE!	0.143312	0.265478	-6.36462	#VALUE!	#VALUE!	-1.50047	2.73024	#VALUE!	#VALUE!	#VALUE!	#VALUE!	#VALUE!	#VALUE!	-0.209702	0.702589	0.0848185	0.485186	1.10434	-2.79687
CPLXII_MALO_48h_03	MALO_48h	0.544551	#VALUE!	-1.47057	-0.750519	#VALUE!	6.36394	-1.25729	#VALUE!	0.29671	#VALUE!	-1.7691	0.484032	-2.16584	#VALUE!	-1.82384	1.04016	2.28435	-0.459574	0.62307	#VALUE!	#VALUE!	-2.24708	#VALUE!	-5.25579	0.739215	1.65716	0.971683	#VALUE!	#VALUE!	-0.16075	0.266644	-7.54013	#VALUE!	#VALUE!	-1.22581	2.83846	#VALUE!	#VALUE!	#VALUE!	#VALUE!	#VALUE!	#VALUE!	-0.764094	0.733007	0.222711	-0.280535	1.35063	-2.72242
CPLXII_MALO_48h_04	MALO_48h	0.475798	#VALUE!	-1.37106	-0.906275	#VALUE!	6.46949	-1.0693	#VALUE!	0.232422	#VALUE!	-0.528485	0.288338	-1.97169	1.55444	-1.7814	1.04117	2.16082	-0.381354	0.568137	#VALUE!	#VALUE!	-2.05803	#VALUE!	-5.75278	0.427611	1.70826	1.01331	#VALUE!	#VALUE!	-0.199697	0.319651	-6.60607	#VALUE!	#VALUE!	-1.1201	2.91563	#VALUE!	#VALUE!	#VALUE!	#VALUE!	#VALUE!	#VALUE!	-0.615447	0.560732	0.149471	0.887724	1.43464	-3.20277
CPLXII_MALO_48h_05	MALO_48h	0.564094	#VALUE!	-1.0141	-0.803768	#VALUE!	6.55375	-0.945579	#VALUE!	0.154248	#VALUE!	-0.898458	0.333545	-1.56255	0.586329	-2.439	1.06269	1.88822	-0.262784	0.685279	#VALUE!	#VALUE!	-2.05165	#VALUE!	-6.74102	1.07081	1.89361	1.07064	#VALUE!	#VALUE!	-0.00837543	0.231574	-7.0469	#VALUE!	#VALUE!	-1.20036	2.94136	#VALUE!	#VALUE!	#VALUE!	#VALUE!	#VALUE!	#VALUE!	-0.396356	0.670687	0.305899	0.936613	1.23027	-3.33918
CPLXII_MALO_48h_06	MALO_48h	0.646973	#VALUE!	-1.4423	-0.834516	#VALUE!	6.42115	-1.04129	#VALUE!	0.164583	#VALUE!	-1.89445	0.413842	-1.78299	-0.631904	-1.74842	1.04369	2.39835	-0.436358	0.5798	#VALUE!	#VALUE!	-2.43161	#VALUE!	-5.90593	0.511646	1.90082	1.02958	#VALUE!	#VALUE!	-0.0780703	0.182465	-6.79439	#VALUE!	#VALUE!	-1.20216	2.84052	#VALUE!	#VALUE!	#VALUE!	#VALUE!	#VALUE!	#VALUE!	-0.406919	0.515642	0.360982	-0.853072	1.26305	-2.78637
CPLXII_3-NP_48h_01	3-NP_48h	0.776742	#VALUE!	-1.31953	-1.64568	#VALUE!	3.88463	-0.931271	#VALUE!	1.40417	#VALUE!	-3.32092	0.247888	-2.14986	#VALUE!	-3.04347	-0.438619	1.20171	-0.841303	1.37959	#VALUE!	#VALUE!	-3.23164	#VALUE!	-3.89836	1.34536	-0.416501	1.21814	#VALUE!	#VALUE!	-0.380563	0.652937	-5.2492	#VALUE!	#VALUE!	-2.1844	2.01396	#VALUE!	#VALUE!	#VALUE!	#VALUE!	#VALUE!	#VALUE!	-0.412449	0.867965	-0.612474	0.0726973	2.24138	-2.08141
CPLXII_3-NP_48h_02	3-NP_48h	0.826309	#VALUE!	-1.54588	-2.24797	#VALUE!	3.9913	-1.10347	#VALUE!	1.54885	#VALUE!	-3.01564	0.203593	-2.05824	#VALUE!	-3.91733	-0.282874	1.41187	-1.01819	1.31366	#VALUE!	#VALUE!	-3.00038	#VALUE!	-4.95577	0.897541	0.0505938	1.11157	#VALUE!	#VALUE!	-0.286889	0.611994	-5.29547	#VALUE!	#VALUE!	-1.99505	1.99342	#VALUE!	#VALUE!	#VALUE!	#VALUE!	#VALUE!	#VALUE!	-0.321183	0.776526	-0.523408	-0.327532	2.12563	-2.23207
CPLXII_3-NP_48h_03	3-NP_48h	0.742044	#VALUE!	-1.31063	-1.90253	#VALUE!	4.03338	-1.05247	#VALUE!	1.37192	#VALUE!	-3.94413	0.185542	-1.87812	#VALUE!	-2.91123	-0.32424	1.45757	-0.982033	1.23742	#VALUE!	#VALUE!	-3.10118	#VALUE!	-2.96296	1.31786	0.134328	1.24696	#VALUE!	#VALUE!	-0.204879	0.521714	-4.7665	#VALUE!	#VALUE!	-1.9997	2.10296	#VALUE!	#VALUE!	#VALUE!	#VALUE!	#VALUE!	#VALUE!	-0.278489	1.0385	-0.430359	-0.304536	2.28021	-2.17565
CPLXII_3-NP_48h_04	3-NP_48h	0.766641	#VALUE!	-1.28211	-1.95542	#VALUE!	3.99967	-0.839741	#VALUE!	1.51842	#VALUE!	-3.35572	0.00862942	-2.21784	#VALUE!	-3.06461	-0.380581	0.999456	-1.06906	1.33691	#VALUE!	#VALUE!	-2.4519	#VALUE!	-5.08969	1.16708	-0.00930826	1.10528	#VALUE!	#VALUE!	-0.275952	0.619192	-4.86454	#VALUE!	#VALUE!	-2.08961	1.93366	#VALUE!	#VALUE!	#VALUE!	#VALUE!	#VALUE!	#VALUE!	-0.420526	0.565915	-0.64516	-0.636153	2.17511	-2.10779
CPLXII_3-NP_48h_05	3-NP_48h	0.981213	#VALUE!	-0.885493	-2.06575	#VALUE!	4.64004	-0.833765	#VALUE!	1.23708	#VALUE!	-5.90973	-0.379952	-1.47088	#VALUE!	-3.3365	-0.633226	1.42156	-1.66352	1.56674	#VALUE!	#VALUE!	-2.64711	#VALUE!	-4.726	1.85665	-0.353255	1.63038	#VALUE!	#VALUE!	0.506052	-0.0169683	-3.86183	#VALUE!	#VALUE!	-2.46422	2.48129	#VALUE!	#VALUE!	#VALUE!	#VALUE!	#VALUE!	#VALUE!	0.0797789	1.26774	-0.327583	-0.944304	2.32853	-1.94874
CPLXIII_ATOV _48h_01	ATOV _48h	0.196895	#VALUE!	-0.475375	0.24475	#VALUE!	0.116095	-0.304714	#VALUE!	-1.51478	#VALUE!	0.557653	0.337075	-2.74865	1.54883	0.14266	0.668923	1.83908	0.0152691	3.56525	#VALUE!	#VALUE!	-0.194808	#VALUE!	5.02316	0.389061	1.28873	0.0995997	#VALUE!	#VALUE!	-1.63437	0.0350721	5.15074	#VALUE!	#VALUE!	-3.0301	-0.527239	#VALUE!	#VALUE!	#VALUE!	#VALUE!	#VALUE!	#VALUE!	0.128172	-0.0815115	-0.836391	0.442868	0.385441	-1.32328
CPLXIII_ATOV _48h_02	ATOV _48h	0.253118	#VALUE!	-0.346879	0.355837	#VALUE!	0.04757	-0.34838	#VALUE!	-1.42007	#VALUE!	0.445426	0.297477	-2.56247	1.36654	0.654318	0.674833	1.98861	-0.14118	3.551	#VALUE!	#VALUE!	-0.204273	#VALUE!	4.97791	0.0256025	1.50316	0.263037	#VALUE!	#VALUE!	-1.11762	0.137096	5.06531	#VALUE!	#VALUE!	-2.94477	-0.625992	#VALUE!	#VALUE!	#VALUE!	#VALUE!	#VALUE!	#VALUE!	-0.124273	-0.00738632	-0.884091	0.683674	-0.0700941	-1.2491
CPLXIII_ATOV _48h_03	ATOV _48h	0.0898586	#VALUE!	-1.32896	-0.310751	#VALUE!	0.190742	-0.927253	#VALUE!	-1.44221	#VALUE!	0.538447	0.148113	-2.38066	0.701057	0.501563	0.643137	1.54875	-0.159463	3.51991	#VALUE!	#VALUE!	-0.0907608	#VALUE!	4.96027	-0.431717	1.18039	0.382774	#VALUE!	#VALUE!	-1.17711	0.0814212	5.12274	#VALUE!	#VALUE!	-2.73519	-0.556958	#VALUE!	#VALUE!	#VALUE!	#VALUE!	#VALUE!	#VALUE!	0.155731	0.276164	-0.828465	0.662544	0.209057	-1.14058
CPLXIII_ATOV _48h_04	ATOV _48h	-0.0660208	#VALUE!	-1.29038	-0.561207	#VALUE!	0.739862	-1.10994	#VALUE!	-1.25131	#VALUE!	1.32669	-0.157046	-2.41565	0.016058	0.227663	0.707741	1.20507	-0.439657	3.37584	#VALUE!	#VALUE!	-0.156768	#VALUE!	4.90325	1.14797	1.23961	0.6105	#VALUE!	#VALUE!	-0.962658	0.0743091	5.00655	#VALUE!	#VALUE!	-2.72289	-0.529615	#VALUE!	#VALUE!	#VALUE!	#VALUE!	#VALUE!	#VALUE!	0.200666	0.312306	-0.757517	0.709719	0.108916	-0.869766
CPLXIII_ATOV _48h_05	ATOV _48h	0.0750429	#VALUE!	-1.29096	-0.943305	#VALUE!	0.412422	-0.908972	#VALUE!	-1.29403	#VALUE!	1.51059	0.323489	-2.2583	-0.167548	-0.190324	0.685821	1.20331	-0.0394945	3.69072	#VALUE!	#VALUE!	-0.199132	#VALUE!	4.98756	0.312603	0.78921	0.226697	#VALUE!	#VALUE!	-1.21202	0.349642	5.09061	#VALUE!	#VALUE!	-2.62237	-0.693483	#VALUE!	#VALUE!	#VALUE!	#VALUE!	#VALUE!	#VALUE!	-0.101629	0.01612	-0.930107	0.662722	-0.066854	-1.00313
CPLXIII_ATOV _48h_06	ATOV _48h	0.122978	#VALUE!	-1.21817	-0.26987	#VALUE!	0.409317	-0.806555	#VALUE!	-1.3837	#VALUE!	0.969314	-0.0104221	-2.40523	1.62057	0.51356	0.672468	1.19919	-0.306074	3.52868	#VALUE!	#VALUE!	-0.173613	#VALUE!	4.98847	0.507927	1.31294	0.233819	#VALUE!	#VALUE!	-1.21306	0.098958	5.12865	#VALUE!	#VALUE!	-2.56177	-0.596131	#VALUE!	#VALUE!	#VALUE!	#VALUE!	#VALUE!	#VALUE!	0.0438142	0.170454	-0.739196	0.525923	0.130057	-0.945914
CPLXIII_AMYC_48h_01	AMYC_48h	0.175882	#VALUE!	0.369922	0.859196	#VALUE!	0.19056	0.342999	#VALUE!	-1.11957	#VALUE!	-1.11731	-0.0832403	-2.18097	2.25443	-0.421697	0.798911	0.0968324	0.0640142	4.21301	#VALUE!	#VALUE!	-1.60346	#VALUE!	3.62503	1.19679	1.46207	0.862699	#VALUE!	#VALUE!	-0.611853	0.192006	3.65404	#VALUE!	#VALUE!	-1.37814	1.21103	#VALUE!	#VALUE!	#VALUE!	#VALUE!	#VALUE!	#VALUE!	-0.0770055	0.541108	-0.340227	0.341973	-0.801762	-1.55084
CPLXIII_AMYC_48h_02	AMYC_48h	0.219961	#VALUE!	0.235239	0.954709	#VALUE!	0.325942	0.354018	#VALUE!	-0.999967	#VALUE!	-0.617613	0.0104363	-2.1387	1.85562	0.308716	0.703189	0.282404	-0.271963	4.36687	#VALUE!	#VALUE!	-1.63423	#VALUE!	3.65944	1.28722	1.27386	0.969271	#VALUE!	#VALUE!	-0.488206	0.546438	3.5966	#VALUE!	#VALUE!	-1.62176	1.22559	#VALUE!	#VALUE!	#VALUE!	#VALUE!	#VALUE!	#VALUE!	-0.681104	0.671174	-0.507188	0.0363335	-0.85408	-2.15874
CPLXIII_AMYC_48h_03	AMYC_48h	0.0425849	#VALUE!	0.382124	0.354954	#VALUE!	0.432137	0.335311	#VALUE!	-1.13712	#VALUE!	-0.401898	-0.217317	-1.83601	2.57417	-0.50223	0.855032	0.111143	-0.0397002	4.30346	#VALUE!	#VALUE!	-1.38035	#VALUE!	3.79779	0.538046	1.49025	1.20793	#VALUE!	#VALUE!	-0.172824	0.365662	3.79881	#VALUE!	#VALUE!	-1.60077	0.436659	#VALUE!	#VALUE!	#VALUE!	#VALUE!	#VALUE!	#VALUE!	-0.216671	0.886092	-0.579526	0.340884	-1.00139	-1.93772
CPLXIII_AMYC_48h_04	AMYC_48h	0.0574973	#VALUE!	0.257959	1.11847	#VALUE!	0.194459	0.40137	#VALUE!	-1.22392	#VALUE!	-0.529707	0.00195435	-2.50573	2.32077	-0.323818	0.762492	-0.0586723	-0.0246627	4.33749	#VALUE!	#VALUE!	-1.49459	#VALUE!	3.74913	0.228029	1.35924	0.813056	#VALUE!	#VALUE!	-0.910719	0.352522	3.73336	#VALUE!	#VALUE!	-1.5644	1.16898	#VALUE!	#VALUE!	#VALUE!	#VALUE!	#VALUE!	#VALUE!	-0.351603	0.488831	-0.431824	0.357009	-0.467994	-1.68215
CPLXIII_AMYC_48h_05	AMYC_48h	0.280261	#VALUE!	-0.253599	0.255173	#VALUE!	0.257496	-0.356185	#VALUE!	-0.954883	#VALUE!	-0.501743	-0.0876761	-2.18883	1.07918	0.22112	0.763804	-0.109866	0.00341169	4.44434	#VALUE!	#VALUE!	-1.96509	#VALUE!	3.57574	0.415571	1.27283	0.967281	#VALUE!	#VALUE!	-0.643487	0.587968	3.54438	#VALUE!	#VALUE!	-1.44774	1.1058	#VALUE!	#VALUE!	#VALUE!	#VALUE!	#VALUE!	#VALUE!	-0.672915	0.504954	-0.548007	0.157802	-0.875837	-2.34975
CPLXIII_AMYC_48h_06	AMYC_48h	0.231949	#VALUE!	0.0110413	0.359997	#VALUE!	0.173966	0.0985215	#VALUE!	-0.806856	#VALUE!	-0.748602	-0.15693	-2.26058	2.01502	-0.137197	0.742191	-0.284815	-0.100333	4.40231	#VALUE!	#VALUE!	-1.70164	#VALUE!	3.77616	0.813595	1.2669	0.917944	#VALUE!	#VALUE!	-0.676529	0.541363	3.70518	#VALUE!	#VALUE!	-1.42059	1.02844	#VALUE!	#VALUE!	#VALUE!	#VALUE!	#VALUE!	#VALUE!	-0.722929	0.613581	-0.573786	0.108128	-0.734982	-2.25292
CPLXIV_CYAN_48h_01	CYAN_48h	-0.654411	#VALUE!	-0.616692	-1.53182	#VALUE!	-0.393476	-0.755804	#VALUE!	-1.32385	#VALUE!	-0.417118	-0.635997	-1.61476	0.355254	-2.281	-0.084197	-0.48027	-0.345638	0.775986	#VALUE!	#VALUE!	-1.45994	#VALUE!	-2.2736	0.42874	0.301913	1.16652	#VALUE!	#VALUE!	0.0616005	-0.122381	-2.13089	#VALUE!	#VALUE!	-0.598791	-0.354138	#VALUE!	#VALUE!	#VALUE!	#VALUE!	#VALUE!	#VALUE!	-0.445047	0.853686	0.169361	0.725254	-0.970103	-1.92114
CPLXIV_CYAN_48h_02	CYAN_48h	-0.260951	#VALUE!	-0.675263	-1.54008	#VALUE!	-0.064046	-0.566908	#VALUE!	-1.67604	#VALUE!	-0.254571	-0.759236	-2.27344	1.53422	-2.05316	-0.124342	0.606327	-0.886006	0.710803	#VALUE!	#VALUE!	-1.4998	#VALUE!	-2.06608	1.19813	0.54469	1.39636	#VALUE!	#VALUE!	0.14316	-0.564705	-2.15609	#VALUE!	#VALUE!	-0.659736	-0.439762	#VALUE!	#VALUE!	#VALUE!	#VALUE!	#VALUE!	#VALUE!	1.57134	1.01731	0.310678	0.650784	-1.41042	-1.67161
CPLXIV_CYAN_48h_03	CYAN_48h	-0.000999536	#VALUE!	-0.189378	-1.25633	#VALUE!	-0.519053	-0.111167	#VALUE!	-1.23848	#VALUE!	0.173483	-0.696171	-2.23392	2.64215	-0.709613	-0.088419	-0.0438948	-0.743839	0.838867	#VALUE!	#VALUE!	-1.58359	#VALUE!	-2.40416	-0.274143	0.772378	0.832635	#VALUE!	#VALUE!	-0.245926	-0.366482	-2.06838	#VALUE!	#VALUE!	-0.571814	#VALUE!	#VALUE!	#VALUE!	#VALUE!	#VALUE!	#VALUE!	#VALUE!	1.30259	0.508543	0.414369	0.371328	-1.30764	-1.83376
CPLXIV_CYAN_48h_04	CYAN_48h	-0.212577	#VALUE!	-0.296917	-1.04372	#VALUE!	0.914318	-0.295155	#VALUE!	-1.28936	#VALUE!	-0.424531	-0.610605	-1.52654	3.11882	-0.957193	-0.102536	0.569968	-0.619692	0.635548	#VALUE!	#VALUE!	-1.36698	#VALUE!	-2.69682	0.242492	0.719393	1.14577	#VALUE!	#VALUE!	0.0726476	-0.478569	-2.20633	#VALUE!	#VALUE!	-0.660313	0.143583	#VALUE!	#VALUE!	#VALUE!	#VALUE!	#VALUE!	#VALUE!	-0.553763	1.01894	0.423706	0.860107	-1.06639	-1.63248
CPLXIV_CYAN_48h_05	CYAN_48h	-0.260464	#VALUE!	-0.557979	-1.4224	#VALUE!	-0.0286561	-0.24382	#VALUE!	-1.24069	#VALUE!	-0.161165	-0.769158	-2.35347	1.94451	-1.63823	-0.0652958	0.70095	-0.677	0.666643	#VALUE!	#VALUE!	-1.73195	#VALUE!	-1.56147	-1.88775	0.631331	0.978722	#VALUE!	#VALUE!	-0.241767	-0.381073	-1.86728	#VALUE!	#VALUE!	-0.556237	0.191642	#VALUE!	#VALUE!	#VALUE!	#VALUE!	#VALUE!	#VALUE!	1.53086	0.966434	0.399858	0.868811	-1.05513	-2.06181
CPLXIV_CYAN_48h_06	CYAN_48h	-0.139478	#VALUE!	-0.701662	-2.22519	#VALUE!	0.790864	-0.545214	#VALUE!	-1.49295	#VALUE!	0.496595	-0.883846	-1.36688	-0.0321684	-0.809261	-0.272755	-0.688764	-0.552964	0.785613	#VALUE!	#VALUE!	-1.31764	#VALUE!	-2.26663	1.01403	-0.0611272	1.24021	#VALUE!	#VALUE!	0.165738	-0.158315	-2.03155	#VALUE!	#VALUE!	-0.642003	-0.599614	#VALUE!	#VALUE!	#VALUE!	#VALUE!	#VALUE!	#VALUE!	0.677073	0.842469	-0.0555615	0.891483	-1.31207	-1.75822
CPLXIV_AZID_48h_01	AZID_48h	0.12861	#VALUE!	-1.00684	-1.89796	#VALUE!	0.44762	-0.622365	#VALUE!	-0.783365	#VALUE!	-3.66179	-0.521748	-3.11158	#VALUE!	-2.03683	0.377802	-0.2523	-0.734774	0.666868	#VALUE!	#VALUE!	-2.64277	#VALUE!	-2.95282	-0.323661	1.03818	0.720861	#VALUE!	#VALUE!	-1.3952	-0.165467	-2.31857	#VALUE!	#VALUE!	-0.335117	-0.2926	#VALUE!	#VALUE!	#VALUE!	#VALUE!	#VALUE!	#VALUE!	0.263997	0.842152	0.261725	0.0266228	-1.77739	-2.61645
CPLXIV_AZID_48h_02	AZID_48h	-0.183397	#VALUE!	-0.111381	-1.90442	#VALUE!	0.902595	0.202704	#VALUE!	-0.896204	#VALUE!	-2.60087	-0.51383	-1.52359	#VALUE!	-3.34518	0.225922	0.248294	-0.396657	0.515266	#VALUE!	#VALUE!	-1.64988	#VALUE!	-3.4459	0.82922	0.96233	1.45754	#VALUE!	#VALUE!	0.0584532	-0.25474	-2.30475	#VALUE!	#VALUE!	-0.623148	-0.449479	#VALUE!	#VALUE!	#VALUE!	#VALUE!	#VALUE!	#VALUE!	0.444074	0.880327	0.15738	0.21997	-2.46489	-3.24885
CPLXIV_AZID_48h_03	AZID_48h	0.0441129	#VALUE!	-0.896661	-2.56645	#VALUE!	1.39013	-1.40156	#VALUE!	-0.633701	#VALUE!	-1.68125	-0.670062	-2.7237	#VALUE!	-1.9043	0.230191	0.480828	-0.751835	0.609607	#VALUE!	#VALUE!	-2.01336	#VALUE!	-3.04287	-0.245407	0.530547	1.20958	#VALUE!	#VALUE!	-0.732402	0.0829887	-2.33685	#VALUE!	#VALUE!	-0.402556	-0.807754	#VALUE!	#VALUE!	#VALUE!	#VALUE!	#VALUE!	#VALUE!	0.452803	1.07647	-0.108197	0.26843	-1.80238	-2.79526
CPLXIV_AZID_48h_04	AZID_48h	0.283936	#VALUE!	-0.391295	-1.68636	#VALUE!	1.0022	-0.861235	#VALUE!	-0.565424	#VALUE!	-3.15537	-0.577007	-3.65205	#VALUE!	-1.58338	0.275143	0.93352	-0.562188	0.557709	#VALUE!	#VALUE!	-1.38731	#VALUE!	-2.95829	0.722463	1.14299	1.00361	#VALUE!	#VALUE!	-1.57621	-0.145674	-2.42962	#VALUE!	#VALUE!	-0.652402	0.471847	#VALUE!	#VALUE!	#VALUE!	#VALUE!	#VALUE!	#VALUE!	0.713152	1.04456	0.135431	0.667646	-1.50152	-2.65259
CPLXIV_AZID_48h_05	AZID_48h	0.230216	#VALUE!	-0.450972	-1.69726	#VALUE!	1.01705	-0.434209	#VALUE!	-0.626503	#VALUE!	-1.26534	-0.613261	-3.26817	#VALUE!	-2.39994	0.327834	0.960913	-0.638959	0.711028	#VALUE!	#VALUE!	-1.70645	#VALUE!	-2.07199	0.828709	1.15375	0.946069	#VALUE!	#VALUE!	-1.43816	-0.122286	-2.09933	#VALUE!	#VALUE!	-0.549565	0.0782213	#VALUE!	#VALUE!	#VALUE!	#VALUE!	#VALUE!	#VALUE!	0.454167	1.13256	0.231478	0.323022	-1.38176	-2.40905
CPLXIV_AZID_48h_06	AZID_48h	-0.00962463	#VALUE!	-0.522972	-2.12737	#VALUE!	1.20594	-0.587673	#VALUE!	-0.65416	#VALUE!	-1.28216	-0.794609	-3.54023	#VALUE!	-1.19237	0.290272	1.30832	-0.59245	0.700322	#VALUE!	#VALUE!	-1.52961	#VALUE!	-2.73124	-0.0630696	1.0664	1.11587	#VALUE!	#VALUE!	-1.32255	-0.144271	-2.27746	#VALUE!	#VALUE!	-0.462125	0.206684	#VALUE!	#VALUE!	#VALUE!	#VALUE!	#VALUE!	#VALUE!	0.681528	1.20173	0.221206	0.714312	-1.32726	-2.96706
Uncoupler_2DNP_48h_01	2DNP_48h	0.367084	#VALUE!	0.0790207	-0.542609	#VALUE!	0.970228	0.266831	#VALUE!	-0.429157	#VALUE!	-0.86378	0.177812	-0.331139	0.29269	1.52238	0.666388	0.526608	0.197216	-0.21828	#VALUE!	#VALUE!	0.0916952	#VALUE!	-1.94797	1.38979	1.06357	1.14166	#VALUE!	#VALUE!	0.516302	0.369232	-2.0517	#VALUE!	#VALUE!	-0.461797	0.523701	#VALUE!	#VALUE!	#VALUE!	#VALUE!	#VALUE!	#VALUE!	-0.00281682	1.18669	-0.536392	0.826414	-0.378648	-1.37418
Uncoupler_2DNP_48h_02	2DNP_48h	0.399918	#VALUE!	-0.629898	-0.141612	#VALUE!	0.814132	-0.633768	#VALUE!	-0.463735	#VALUE!	-1.73049	0.0686261	-0.751001	0.50484	1.78246	0.558065	1.21265	-0.0175935	-0.287282	#VALUE!	#VALUE!	0.162496	#VALUE!	-2.80136	0.521513	1.03029	0.693508	#VALUE!	#VALUE!	0.909854	0.256882	-2.72484	#VALUE!	#VALUE!	-0.601114	0.555983	#VALUE!	#VALUE!	#VALUE!	#VALUE!	#VALUE!	#VALUE!	-0.65367	0.652278	-0.510987	-0.0307954	0.146345	-2.14065
Uncoupler_2DNP_48h_03	2DNP_48h	0.358607	#VALUE!	0.217649	0.14687	#VALUE!	0.95472	-0.175102	#VALUE!	-0.913011	#VALUE!	-0.272631	0.283491	-0.708972	1.38828	2.11193	0.677556	1.12497	0.251365	-0.281692	#VALUE!	#VALUE!	0.238932	#VALUE!	-2.10109	0.80584	1.44204	1.0501	#VALUE!	#VALUE!	0.653396	0.267429	-2.26716	#VALUE!	#VALUE!	-0.529119	1.1393	#VALUE!	#VALUE!	#VALUE!	#VALUE!	#VALUE!	#VALUE!	-1.01162	1.24214	-0.209291	1.51579	-0.0745996	-0.961881
Uncoupler_2DNP_48h_05	2DNP_48h	0.440616	#VALUE!	-0.283192	-0.479975	#VALUE!	1.04938	-0.158824	#VALUE!	-0.334936	#VALUE!	-1.05545	0.0188452	-0.673736	1.16281	1.99609	0.756497	0.845257	0.014277	-0.351808	#VALUE!	#VALUE!	0.108732	#VALUE!	-2.23228	1.43319	1.52486	1.03744	#VALUE!	#VALUE!	0.812111	0.145723	-2.41453	#VALUE!	#VALUE!	-0.314958	0.663222	#VALUE!	#VALUE!	#VALUE!	#VALUE!	#VALUE!	#VALUE!	-0.395611	1.08237	-0.211414	0.232114	-0.0674835	-1.77635
Uncoupler_2DNP_48h_06	2DNP_48h	0.467263	#VALUE!	0.0693001	0.119582	#VALUE!	0.860658	-0.0688823	#VALUE!	-0.302942	#VALUE!	-0.82929	0.18063	-0.585147	0.901347	1.96906	0.681674	0.426026	0.136651	-0.189672	#VALUE!	#VALUE!	0.0289837	#VALUE!	-3.31701	0.984611	1.23332	0.870255	#VALUE!	#VALUE!	0.633657	0.363081	-2.35574	#VALUE!	#VALUE!	-0.411756	0.769586	#VALUE!	#VALUE!	#VALUE!	#VALUE!	#VALUE!	#VALUE!	-0.239495	0.826929	-0.395674	0.435568	-0.170393	-1.55822
Uncoupler_CCCP_48h_01	CCCP_48h	0.0834183	#VALUE!	0.183579	-0.273544	#VALUE!	0.788239	0.611028	#VALUE!	-0.728185	#VALUE!	-1.19825	0.232903	-0.325023	1.6264	0.187147	0.897516	0.485326	-0.0814304	0.657941	#VALUE!	#VALUE!	-0.422805	#VALUE!	-3.22456	0.568106	1.73937	0.886933	#VALUE!	#VALUE!	0.853889	0.15661	-3.12023	#VALUE!	#VALUE!	-0.0199123	0.768732	#VALUE!	#VALUE!	#VALUE!	#VALUE!	#VALUE!	#VALUE!	-0.825239	0.271662	0.187106	0.249864	0.364342	-1.55545
Uncoupler_CCCP_48h_02	CCCP_48h	0.266321	#VALUE!	0.00920091	0.072596	#VALUE!	0.820761	-0.0824055	#VALUE!	-0.690522	#VALUE!	-1.31364	0.280225	-0.623216	1.97803	0.302865	0.959267	0.52028	0.00327983	0.670948	#VALUE!	#VALUE!	-1.10421	#VALUE!	-3.85479	0.852976	2.08103	0.881356	#VALUE!	#VALUE!	0.238731	0.0581788	-3.34683	#VALUE!	#VALUE!	0.113265	1.03287	#VALUE!	#VALUE!	#VALUE!	#VALUE!	#VALUE!	#VALUE!	-0.969077	0.625394	0.441108	0.376212	0.981183	-0.905055
Uncoupler_CCCP_48h_03	CCCP_48h	0.241549	#VALUE!	-0.131567	-0.775464	#VALUE!	0.595648	-0.0259735	#VALUE!	-0.581077	#VALUE!	-0.588627	0.0979989	-0.890176	-0.137217	0.323862	0.504898	0.300028	-0.15442	0.224824	#VALUE!	#VALUE!	-1.16186	#VALUE!	-2.77475	1.08209	0.997622	1.11359	#VALUE!	#VALUE!	0.680505	0.254939	-3.05388	#VALUE!	#VALUE!	-0.35467	0.711505	#VALUE!	#VALUE!	#VALUE!	#VALUE!	#VALUE!	#VALUE!	-0.539665	0.920056	-0.152676	0.200634	0.779409	-0.722955
Uncoupler_CCCP_48h_04	CCCP_48h	0.318889	#VALUE!	-0.0425322	-0.0849023	#VALUE!	0.996784	0.269225	#VALUE!	-0.719137	#VALUE!	-1.18387	0.302421	-0.564811	1.62568	0.371579	0.948222	0.475046	-0.0460284	0.500595	#VALUE!	#VALUE!	-2.15375	#VALUE!	-2.87397	0.737453	1.99868	0.829584	#VALUE!	#VALUE!	0.080582	0.11028	-3.10725	#VALUE!	#VALUE!	0.0644117	1.00448	#VALUE!	#VALUE!	#VALUE!	#VALUE!	#VALUE!	#VALUE!	-1.00811	0.60131	0.480251	0.450123	0.924649	-1.00141
Uncoupler_CCCP_48h_05	CCCP_48h	0.144011	#VALUE!	-0.480702	-0.368511	#VALUE!	0.1897	-0.379792	#VALUE!	-0.722308	#VALUE!	-1.29242	0.162715	-0.597992	0.565081	-0.108985	0.716965	0.513246	-0.0361048	0.310966	#VALUE!	#VALUE!	-1.23989	#VALUE!	-3.80604	1.27524	1.51244	0.878566	#VALUE!	#VALUE!	0.681065	0.197662	-3.14655	#VALUE!	#VALUE!	-0.154722	0.787836	#VALUE!	#VALUE!	#VALUE!	#VALUE!	#VALUE!	#VALUE!	-0.487539	0.672275	0.133874	-0.172985	0.503752	-0.778353
Uncoupler_CCCP_48h_06	CCCP_48h	0.0760757	#VALUE!	-0.00750128	-0.386475	#VALUE!	0.991275	0.123275	#VALUE!	-0.730663	#VALUE!	-1.29847	0.159018	-0.308837	1.31757	-0.092341	0.844937	0.504595	-0.00722782	0.322765	#VALUE!	#VALUE!	-1.36886	#VALUE!	-2.18604	0.680595	1.74214	0.889698	#VALUE!	#VALUE!	0.749616	0.183983	-3.06093	#VALUE!	#VALUE!	0.0787861	0.692885	#VALUE!	#VALUE!	#VALUE!	#VALUE!	#VALUE!	#VALUE!	-0.587745	0.412348	0.248319	0.565313	0.460625	-1.36647
Uncoupler_EMOD_48h_01	EMOD_48h	0.0461305	#VALUE!	-0.291252	0.606528	#VALUE!	0.492107	0.102563	#VALUE!	-0.0135917	#VALUE!	-1.9498	0.234718	-0.287295	3.3219	1.96555	0.86717	0.379309	0.225049	0.506503	#VALUE!	#VALUE!	-0.508663	#VALUE!	-1.65755	1.12253	2.13483	1.37305	#VALUE!	#VALUE!	0.628091	0.125672	-1.85046	#VALUE!	#VALUE!	-0.306022	0.801617	#VALUE!	#VALUE!	#VALUE!	#VALUE!	#VALUE!	#VALUE!	0.42654	1.17598	0.641392	0.332838	-0.997262	-2.11096
Uncoupler_EMOD_48h_02	EMOD_48h	0.331394	#VALUE!	-0.124705	1.00517	#VALUE!	0.459138	0.122643	#VALUE!	0.0678947	#VALUE!	-2.98058	0.235166	-0.651462	3.01372	2.5918	0.934511	0.390303	0.0244288	0.385246	#VALUE!	#VALUE!	-0.877975	#VALUE!	-3.96769	0.981327	2.16488	1.15128	#VALUE!	#VALUE!	0.461413	0.275454	-2.54611	#VALUE!	#VALUE!	-0.0926359	1.57655	#VALUE!	#VALUE!	#VALUE!	#VALUE!	#VALUE!	#VALUE!	-0.187338	0.936272	0.703388	-0.0934006	-0.444323	-2.0759
Uncoupler_EMOD_48h_03	EMOD_48h	0.838896	#VALUE!	-0.666679	1.18835	#VALUE!	1.25801	-0.716563	#VALUE!	0.106577	#VALUE!	-2.6151	-0.159866	-0.546197	2.15563	2.7029	0.784897	0.572476	-0.719212	0.497994	#VALUE!	#VALUE!	-0.266205	#VALUE!	-2.03137	0.774943	2.31605	1.32231	#VALUE!	#VALUE!	0.963799	-0.82423	-1.93176	#VALUE!	#VALUE!	-0.0701751	1.83316	#VALUE!	#VALUE!	#VALUE!	#VALUE!	#VALUE!	#VALUE!	0.252259	1.43199	0.807166	0.976136	0.787916	-0.944323
Uncoupler_EMOD_48h_04	EMOD_48h	0.57776	#VALUE!	-0.339173	1.02807	#VALUE!	0.950634	-0.529243	#VALUE!	-0.0528787	#VALUE!	-1.86438	0.268851	-0.746499	2.99531	2.39229	0.931384	0.502035	0.0270576	0.537352	#VALUE!	#VALUE!	-0.831622	#VALUE!	-1.84036	0.56414	2.30932	1.04982	#VALUE!	#VALUE!	0.618607	0.180827	-2.40763	#VALUE!	#VALUE!	-0.20766	1.70088	#VALUE!	#VALUE!	#VALUE!	#VALUE!	#VALUE!	#VALUE!	-0.347759	1.02237	0.850226	0.521819	0.319766	-1.56452
Uncoupler_EMOD_48h_05	EMOD_48h	0.720474	#VALUE!	-1.04904	1.10233	#VALUE!	1.42078	-0.944911	#VALUE!	-0.183614	#VALUE!	-1.94126	0.147563	-0.660182	2.15854	2.47835	0.912627	0.603464	0.130442	0.479996	#VALUE!	#VALUE!	-0.647958	#VALUE!	-2.50776	0.361311	2.18056	1.08534	#VALUE!	#VALUE!	0.739462	0.0640859	-2.38724	#VALUE!	#VALUE!	-0.199034	1.44163	#VALUE!	#VALUE!	#VALUE!	#VALUE!	#VALUE!	#VALUE!	-0.0402509	1.0617	0.690522	0.424057	0.400744	-1.14762
Uncoupler_EMOD_48h_06	EMOD_48h	0.610828	#VALUE!	-0.812433	0.393346	#VALUE!	0.979376	-0.645487	#VALUE!	0.525035	#VALUE!	-2.21529	-0.00591596	-0.484412	1.95445	2.3881	0.779797	0.307727	-0.700834	0.5708	#VALUE!	#VALUE!	-0.629555	#VALUE!	-1.7981	0.786147	1.9916	1.16083	#VALUE!	#VALUE!	0.799429	-0.471819	-1.98285	#VALUE!	#VALUE!	-0.101001	1.39071	#VALUE!	#VALUE!	#VALUE!	#VALUE!	#VALUE!	#VALUE!	0.251955	1.23091	0.726696	0.267713	0.138103	-1.25042
TopoII_MITO_48h_01	MITO_48h	0.393414	#VALUE!	-2.06732	0.287138	#VALUE!	0.596019	-1.9018	#VALUE!	-1.74321	#VALUE!	-0.331436	-0.153369	-0.437381	1.88403	0.0769242	0.0608254	0.918203	0.338066	-0.000159487	#VALUE!	#VALUE!	-0.45526	#VALUE!	-2.97121	0.707455	0.0474516	0.40838	#VALUE!	#VALUE!	1.12939	0.379179	-2.54402	#VALUE!	#VALUE!	-0.667825	-0.0313612	#VALUE!	#VALUE!	#VALUE!	#VALUE!	#VALUE!	#VALUE!	-0.0670097	0.142756	0.132756	0.855385	0.575185	0.866583
TopoII_MITO_48h_02	MITO_48h	0.486652	#VALUE!	-1.99064	0.12512	#VALUE!	0.972042	-1.60697	#VALUE!	-1.36405	#VALUE!	-1.01734	-0.0781573	-0.283571	1.49141	0.206478	0.191395	0.313076	-0.052458	-0.0229295	#VALUE!	#VALUE!	-0.578579	#VALUE!	-2.28013	0.562944	0.124946	0.417943	#VALUE!	#VALUE!	0.99234	0.494453	-2.63823	#VALUE!	#VALUE!	-0.51844	-0.0467991	#VALUE!	#VALUE!	#VALUE!	#VALUE!	#VALUE!	#VALUE!	0.161189	0.119809	0.151966	0.309401	0.274361	0.643429
TopoII_MITO_48h_03	MITO_48h	-0.778329	#VALUE!	-3.26424	-1.29241	#VALUE!	0.570418	-2.62989	#VALUE!	-1.53945	#VALUE!	-0.859005	0.0101803	-0.274504	1.16718	0.0142881	0.157673	0.466775	0.291194	0.0039633	#VALUE!	#VALUE!	-0.768314	#VALUE!	-3.19856	0.485291	-0.303036	0.223221	#VALUE!	#VALUE!	1.08004	0.36134	-2.88947	#VALUE!	#VALUE!	-0.501611	-0.555483	#VALUE!	#VALUE!	#VALUE!	#VALUE!	#VALUE!	#VALUE!	-0.21654	-0.0501872	0.0464498	0.602452	0.717434	0.41921
TopoII_MITO_48h_04	MITO_48h	0.298369	#VALUE!	-2.59164	-0.689329	#VALUE!	0.824921	-2.24018	#VALUE!	-1.70668	#VALUE!	-0.85421	-0.255445	-0.298507	0.554603	-0.129371	0.0942735	-0.164377	0.24572	-0.0684458	#VALUE!	#VALUE!	-0.618039	#VALUE!	-2.58188	0.0337112	-0.314641	0.397392	#VALUE!	#VALUE!	1.05041	0.534813	-2.73881	#VALUE!	#VALUE!	-0.639561	-0.220375	#VALUE!	#VALUE!	#VALUE!	#VALUE!	#VALUE!	#VALUE!	0.0268204	0.146923	-0.0108103	0.493515	0.419718	0.527845
TopoII_MITO_48h_05	MITO_48h	0.549468	#VALUE!	-2.05744	-0.168832	#VALUE!	0.748964	-1.83214	#VALUE!	-1.68649	#VALUE!	-0.494356	-0.0450725	-0.292626	1.5255	-0.354536	0.115869	0.816306	0.448463	0.00275887	#VALUE!	#VALUE!	-0.396834	#VALUE!	-2.53037	0.565878	-0.159397	0.353969	#VALUE!	#VALUE!	1.08615	0.347551	-2.53671	#VALUE!	#VALUE!	-0.579717	-0.165916	#VALUE!	#VALUE!	#VALUE!	#VALUE!	#VALUE!	#VALUE!	-0.0691593	0.185851	0.115092	1.363	0.46163	1.11899
TopoII_MITO_48h_06	MITO_48h	0.521225	#VALUE!	-1.79523	-0.0185907	#VALUE!	0.725544	-1.79931	#VALUE!	-1.97387	#VALUE!	-1.65113	-0.350122	-0.415372	2.21278	0.203876	0.17453	0.838345	0.118356	-0.0537731	#VALUE!	#VALUE!	-0.521941	#VALUE!	-2.22993	0.839051	0.155941	0.58638	#VALUE!	#VALUE!	1.12218	0.397075	-2.68827	#VALUE!	#VALUE!	-0.46326	0.0104571	#VALUE!	#VALUE!	#VALUE!	#VALUE!	#VALUE!	#VALUE!	-0.060768	0.521374	0.190836	1.00894	0.818669	0.953025
TopoII_DOXO_48h_01	DOXO_48h	-0.30802	#VALUE!	-1.56641	-0.0545787	#VALUE!	1.10019	-1.09392	#VALUE!	-0.925136	#VALUE!	-1.07772	-0.462875	-0.365861	#VALUE!	0.0340704	-0.255089	-0.594307	-0.29554	0.313651	#VALUE!	#VALUE!	-1.01758	#VALUE!	-1.44387	0.644098	-0.455947	0.799399	#VALUE!	#VALUE!	0.922057	0.226987	-1.41185	#VALUE!	#VALUE!	-1.25322	-0.123072	#VALUE!	#VALUE!	#VALUE!	#VALUE!	#VALUE!	#VALUE!	0.548646	0.367594	-0.648469	0.961932	-0.229718	-0.376727
TopoII_DOXO_48h_02	DOXO_48h	-0.221752	#VALUE!	-1.41972	0.0511622	#VALUE!	0.777416	-1.14237	#VALUE!	-0.90408	#VALUE!	-1.07648	-0.406382	-0.509579	#VALUE!	0.197014	0.029911	0.376555	-0.179507	0.45207	#VALUE!	#VALUE!	-1.10213	#VALUE!	-1.26244	0.260336	-0.0330022	0.165047	#VALUE!	#VALUE!	0.787601	0.267908	-1.37925	#VALUE!	#VALUE!	-0.944111	-0.168827	#VALUE!	#VALUE!	#VALUE!	#VALUE!	#VALUE!	#VALUE!	0.0937921	-0.219429	-0.399085	0.620536	0.298961	-0.184398
TopoII_DOXO_48h_03	DOXO_48h	-0.244897	#VALUE!	-1.94896	0.0399457	#VALUE!	0.773598	-1.29999	#VALUE!	-0.764117	#VALUE!	-0.89778	-0.457523	-0.396497	#VALUE!	0.384253	-0.125771	-0.406107	-0.43443	0.408765	#VALUE!	#VALUE!	-1.00582	#VALUE!	-0.962027	0.272211	-0.311258	0.403866	#VALUE!	#VALUE!	0.732685	0.330886	-1.38228	#VALUE!	#VALUE!	-1.0286	-0.247118	#VALUE!	#VALUE!	#VALUE!	#VALUE!	#VALUE!	#VALUE!	0.426204	-0.0946017	-0.517792	0.191437	-0.0598315	-0.290708
TopoII_DOXO_48h_04	DOXO_48h	0.0433515	#VALUE!	-1.45616	-0.0149303	#VALUE!	1.16113	-1.13852	#VALUE!	-0.736328	#VALUE!	-0.95727	-0.589913	-0.540799	#VALUE!	1.09656	-0.0194082	-0.16195	-0.537619	0.406055	#VALUE!	#VALUE!	-1.34625	#VALUE!	-2.57999	0.675734	-0.0965027	0.466641	#VALUE!	#VALUE!	0.818278	0.303689	-1.17574	#VALUE!	#VALUE!	-0.991665	-0.285417	#VALUE!	#VALUE!	#VALUE!	#VALUE!	#VALUE!	#VALUE!	0.389074	0.119965	-0.416952	0.177715	0.333198	-0.28702
TopoII_DOXO_48h_05	DOXO_48h	-0.154203	#VALUE!	-1.74382	0.0513397	#VALUE!	1.13574	-1.37167	#VALUE!	-0.700249	#VALUE!	-0.536172	-0.522952	-0.560842	#VALUE!	0.237416	-0.13593	0.29747	-0.527013	0.217159	#VALUE!	#VALUE!	-1.07795	#VALUE!	-1.37879	0.412469	-0.45841	0.512318	#VALUE!	#VALUE!	0.5248	0.430839	-1.9659	#VALUE!	#VALUE!	-1.18785	-0.71792	#VALUE!	#VALUE!	#VALUE!	#VALUE!	#VALUE!	#VALUE!	0.529131	0.105839	-0.702154	0.026261	-0.151274	-0.368742
TopoII_DOXO_48h_06	DOXO_48h	-0.355076	#VALUE!	-2.04834	-0.0206366	#VALUE!	1.04874	-1.5322	#VALUE!	-0.732327	#VALUE!	-1.06193	-0.477627	-0.536255	#VALUE!	-0.832548	-0.154332	-0.545872	-0.580688	0.206915	#VALUE!	#VALUE!	-1.17825	#VALUE!	-1.97198	0.636409	-0.467305	0.454843	#VALUE!	#VALUE!	0.863183	0.338801	-1.54443	#VALUE!	#VALUE!	-0.863103	-0.332794	#VALUE!	#VALUE!	#VALUE!	#VALUE!	#VALUE!	#VALUE!	0.392556	0.0733038	-0.577613	-0.194963	0.283891	-0.350086
TopoII_ETOP_48h_01	ETOP_48h	-0.33339	#VALUE!	0.0122062	0.734384	#VALUE!	0.780049	0.100132	#VALUE!	-1.51676	#VALUE!	0.701277	0.182842	-0.378326	0.972581	0.400373	-0.0117739	-0.0593332	0.476324	-0.0333155	#VALUE!	#VALUE!	-0.452746	#VALUE!	-1.69507	0.570393	0.176092	0.593808	#VALUE!	#VALUE!	0.780155	0.207968	-1.63044	#VALUE!	#VALUE!	-0.664142	#VALUE!	#VALUE!	#VALUE!	#VALUE!	#VALUE!	#VALUE!	#VALUE!	-0.215882	0.363435	0.0316323	0.361467	-0.576249	-0.553774
TopoII_ETOP_48h_02	ETOP_48h	-0.358762	#VALUE!	-0.23092	0.569228	#VALUE!	0.682261	-0.058885	#VALUE!	-1.27367	#VALUE!	0.883825	0.206619	-0.404552	0.969993	0.136869	-0.00663582	-0.311682	0.303555	-0.124118	#VALUE!	#VALUE!	-0.625821	#VALUE!	-1.35574	0.353588	0.0389009	0.378296	#VALUE!	#VALUE!	0.468847	0.295319	-1.74417	#VALUE!	#VALUE!	-0.610073	#VALUE!	#VALUE!	#VALUE!	#VALUE!	#VALUE!	#VALUE!	#VALUE!	-0.0566632	0.329402	-0.125204	0.308699	-0.706006	-1.43127
TopoII_ETOP_48h_03	ETOP_48h	-0.259516	#VALUE!	0.268604	0.852246	#VALUE!	0.474995	0.0985053	#VALUE!	-1.70088	#VALUE!	0.909264	0.308925	-0.404924	1.40536	-0.228141	-0.174188	-1.29381	-0.134447	0.206532	#VALUE!	#VALUE!	-1.75579	#VALUE!	-2.13172	-0.282009	0.0264549	0.0327702	#VALUE!	#VALUE!	0.0423009	-0.163719	-2.00076	#VALUE!	#VALUE!	-0.737847	#VALUE!	#VALUE!	#VALUE!	#VALUE!	#VALUE!	#VALUE!	#VALUE!	-0.376064	-0.0823577	-0.101389	-0.564135	-1.50416	-0.833949
TopoII_ETOP_48h_04	ETOP_48h	-0.354417	#VALUE!	-0.605809	-0.0112028	#VALUE!	1.07798	-0.473655	#VALUE!	-1.31824	#VALUE!	1.12554	0.197621	-0.456369	-0.507363	-0.481005	-0.380072	-0.0362079	0.300097	-0.23111	#VALUE!	#VALUE!	-0.682164	#VALUE!	-1.833	-0.0348498	-0.472725	0.482686	#VALUE!	#VALUE!	0.459545	0.317127	-1.76817	#VALUE!	#VALUE!	-0.994259	#VALUE!	#VALUE!	#VALUE!	#VALUE!	#VALUE!	#VALUE!	#VALUE!	0.00318234	0.331768	-0.320807	0.215305	-0.794821	-0.970998
TopoII_ETOP_48h_05	ETOP_48h	-0.652549	#VALUE!	-0.405258	0.149011	#VALUE!	0.47612	-0.687245	#VALUE!	-1.50243	#VALUE!	0.605729	0.0248044	-0.700915	-2.35365	0.107554	-0.302912	-0.779618	-0.136405	-0.112653	#VALUE!	#VALUE!	-1.19576	#VALUE!	-2.2213	-0.114544	-0.349525	-0.0659174	#VALUE!	#VALUE!	0.223401	0.0484679	-2.19687	#VALUE!	#VALUE!	-0.936962	#VALUE!	#VALUE!	#VALUE!	#VALUE!	#VALUE!	#VALUE!	#VALUE!	-0.404509	-0.231068	-0.447102	-0.220228	-0.952715	-1.40237
TopoII_ETOP_48h_06	ETOP_48h	-0.253794	#VALUE!	-0.489182	0.0882277	#VALUE!	0.940162	-0.661634	#VALUE!	-1.51255	#VALUE!	0.731788	0.0206514	-0.565416	0.239173	-0.363295	-0.412916	-0.165704	-0.289626	-0.393864	#VALUE!	#VALUE!	-1.49901	#VALUE!	-1.89279	-0.483291	-0.301382	-0.107254	#VALUE!	#VALUE!	0.583383	-0.0345139	-2.00557	#VALUE!	#VALUE!	-0.964217	#VALUE!	#VALUE!	#VALUE!	#VALUE!	#VALUE!	#VALUE!	#VALUE!	-0.296954	-0.249949	-0.332502	-0.313845	-0.83892	-0.618422
TopoI_IRIN_48h_01	IRIN_48h	-0.179299	#VALUE!	-0.846221	0.0238471	#VALUE!	0.134372	0.19539	#VALUE!	-2.40352	#VALUE!	2.01829	0.320202	-0.429207	0.910994	-0.590146	-0.164283	0.117223	-0.100591	-0.00597392	#VALUE!	#VALUE!	0.0917616	#VALUE!	-1.47763	0.362965	-0.540715	0.260743	#VALUE!	#VALUE!	0.75671	-0.0338462	-1.24178	#VALUE!	#VALUE!	-0.525195	-0.962352	#VALUE!	#VALUE!	#VALUE!	#VALUE!	#VALUE!	#VALUE!	-0.259971	0.0551917	-0.203835	0.584741	0.519795	-0.424163
TopoI_IRIN_48h_02	IRIN_48h	-0.0386093	#VALUE!	-0.868709	0.207998	#VALUE!	-0.0396159	0.153872	#VALUE!	-2.10959	#VALUE!	1.81382	0.351629	-0.523963	1.31574	-0.0855	0.0204354	0.632669	0.0594942	0.0119366	#VALUE!	#VALUE!	0.18675	#VALUE!	-0.945253	0.373726	-0.309233	0.27611	#VALUE!	#VALUE!	0.737086	-0.011686	-1.23135	#VALUE!	#VALUE!	-0.388094	-0.761396	#VALUE!	#VALUE!	#VALUE!	#VALUE!	#VALUE!	#VALUE!	-0.230717	0.0944616	-0.181402	0.667974	0.87435	-0.656134
TopoI_IRIN_48h_03	IRIN_48h	-0.217112	#VALUE!	-0.889485	-0.137947	#VALUE!	-0.127916	-0.0432089	#VALUE!	-2.28763	#VALUE!	1.91969	0.241741	-0.362099	0.978852	-0.408501	-0.429451	-0.166445	-0.174936	0.0685476	#VALUE!	#VALUE!	0.252258	#VALUE!	-1.07649	0.541646	-1.04301	0.241548	#VALUE!	#VALUE!	0.841843	0.0429117	-0.977552	#VALUE!	#VALUE!	-0.854326	-1.14248	#VALUE!	#VALUE!	#VALUE!	#VALUE!	#VALUE!	#VALUE!	-0.145728	0.210732	-0.449964	0.36322	0.583348	0.19299
TopoI_IRIN_48h_04	IRIN_48h	-0.244147	#VALUE!	-0.694994	0.232377	#VALUE!	0.187747	0.190313	#VALUE!	-2.18043	#VALUE!	2.02555	0.281673	-0.404091	0.692591	-0.420781	-0.189393	-0.123604	-0.0372869	-0.173563	#VALUE!	#VALUE!	0.112083	#VALUE!	-1.19591	0.320351	-0.324928	0.270384	#VALUE!	#VALUE!	0.714996	-0.0492333	-1.24399	#VALUE!	#VALUE!	-0.594034	-0.789603	#VALUE!	#VALUE!	#VALUE!	#VALUE!	#VALUE!	#VALUE!	-0.230401	0.112696	-0.109881	0.424458	0.25734	0.130281
TopoI_IRIN_48h_05	IRIN_48h	-0.0461276	#VALUE!	-0.737272	0.0861025	#VALUE!	2.05139	-0.0192459	#VALUE!	-2.18398	#VALUE!	1.93819	0.166325	-0.394416	0.915428	-0.755676	-0.427468	0.233492	-0.224725	-0.307859	#VALUE!	#VALUE!	0.368828	#VALUE!	-1.3866	0.669043	-0.377422	0.422586	#VALUE!	#VALUE!	0.910427	-0.124478	-1.37651	#VALUE!	#VALUE!	-0.705834	-0.99274	#VALUE!	#VALUE!	#VALUE!	#VALUE!	#VALUE!	#VALUE!	-0.150354	0.325681	-0.180315	0.282357	0.481647	0.380863
TopoI_IRIN_48h_06	IRIN_48h	-0.0341217	#VALUE!	-0.73972	0.0336084	#VALUE!	-0.156589	-0.0167671	#VALUE!	-2.47506	#VALUE!	1.89638	0.297164	-0.381999	0.465848	-0.138024	-0.286236	0.256503	0.191779	0.203846	#VALUE!	#VALUE!	0.254557	#VALUE!	-0.674189	0.223257	-0.610649	0.104663	#VALUE!	#VALUE!	0.78262	-0.0146533	-1.06925	#VALUE!	#VALUE!	-0.707703	-0.878571	#VALUE!	#VALUE!	#VALUE!	#VALUE!	#VALUE!	#VALUE!	-0.311387	0.0949702	-0.334967	0.655609	0.876226	-0.0571383
TopoI_CMPT_48h_01	CMPT_48h	0.104896	#VALUE!	-1.34281	-0.493554	#VALUE!	0.747909	-1.29096	#VALUE!	-1.96049	#VALUE!	1.20456	0.357357	-0.332993	1.1398	0.856138	0.214793	0.518615	0.500326	0.230689	#VALUE!	#VALUE!	0.000584956	#VALUE!	-1.6146	0.878333	0.660334	0.729595	#VALUE!	#VALUE!	0.637392	0.269608	-1.86272	#VALUE!	#VALUE!	-0.850536	-0.590165	#VALUE!	#VALUE!	#VALUE!	#VALUE!	#VALUE!	#VALUE!	-0.0974068	0.627249	0.295845	0.600485	0.889885	0.711345
TopoI_CMPT_48h_02	CMPT_48h	-0.00427633	#VALUE!	-1.26731	-0.427135	#VALUE!	1.98167	-0.989608	#VALUE!	-1.84469	#VALUE!	1.28674	0.261592	-0.260899	1.49741	-0.0716367	-0.127715	0.590693	0.384759	0.229494	#VALUE!	#VALUE!	-0.0305986	#VALUE!	-1.91337	1.2167	0.671654	0.830643	#VALUE!	#VALUE!	0.725843	0.226793	-1.95289	#VALUE!	#VALUE!	-1.17941	-0.649774	#VALUE!	#VALUE!	#VALUE!	#VALUE!	#VALUE!	#VALUE!	0.0975124	0.765778	0.291967	1.19693	0.432088	1.10822
TopoI_CMPT_48h_03	CMPT_48h	0.115658	#VALUE!	-1.23292	-0.77455	#VALUE!	0.67894	-1.21277	#VALUE!	-1.7107	#VALUE!	1.24416	0.410743	-0.393566	-0.193232	1.08665	0.51071	0.645928	0.371795	0.173312	#VALUE!	#VALUE!	0.0389062	#VALUE!	-2.16442	1.06974	0.690587	0.634261	#VALUE!	#VALUE!	0.538389	0.42521	-1.85009	#VALUE!	#VALUE!	-0.517841	-0.523915	#VALUE!	#VALUE!	#VALUE!	#VALUE!	#VALUE!	#VALUE!	-0.102202	0.966434	0.260335	0.856323	1.23534	-0.784471
TopoI_CMPT_48h_04	CMPT_48h	-0.0122877	#VALUE!	-0.962417	0.0275647	#VALUE!	1.82003	-0.813014	#VALUE!	-1.9853	#VALUE!	1.0953	0.374686	-0.228719	1.51921	0.639148	0.0922757	0.786854	0.524859	0.36092	#VALUE!	#VALUE!	-0.0675633	#VALUE!	-1.87305	0.791789	0.74217	0.898379	#VALUE!	#VALUE!	0.70338	0.251566	-1.87588	#VALUE!	#VALUE!	-1.00801	-0.268941	#VALUE!	#VALUE!	#VALUE!	#VALUE!	#VALUE!	#VALUE!	0.0670843	0.720031	0.262687	0.842365	0.381237	0.86464
TopoI_CMPT_48h_05	CMPT_48h	0.0351988	#VALUE!	-1.52561	-1.36835	#VALUE!	0.671197	-1.34129	#VALUE!	-1.67517	#VALUE!	1.53147	0.276729	-0.374177	-0.0065456	0.552689	0.0975137	-0.548555	0.143776	0.11324	#VALUE!	#VALUE!	0.0105409	#VALUE!	-1.50403	0.896884	0.180859	0.719563	#VALUE!	#VALUE!	0.460751	0.453557	-1.94206	#VALUE!	#VALUE!	-0.971679	-0.954454	#VALUE!	#VALUE!	#VALUE!	#VALUE!	#VALUE!	#VALUE!	0.185475	0.428397	0.067528	0.608238	0.882727	-0.0376571
TopoI_CMPT_48h_06	CMPT_48h	0.101156	#VALUE!	-1.15238	-0.659642	#VALUE!	1.23812	-1.14403	#VALUE!	-1.66511	#VALUE!	1.16018	0.322221	-0.316089	0.306399	0.783327	0.292618	-0.0438932	0.291576	0.073198	#VALUE!	#VALUE!	-0.0149018	#VALUE!	-2.32223	0.993863	0.574528	0.661066	#VALUE!	#VALUE!	0.586155	0.395721	-1.8211	#VALUE!	#VALUE!	-0.834697	-0.584317	#VALUE!	#VALUE!	#VALUE!	#VALUE!	#VALUE!	#VALUE!	0.106953	0.498254	0.214396	0.950923	0.727687	0.456169
HMG-CoAr_LOVA_48h_02	LOVA_48h	-0.129897	#VALUE!	-0.743633	-1.07125	#VALUE!	-0.195981	-0.0885339	#VALUE!	-0.0459428	#VALUE!	0.159445	-0.192546	-0.591901	1.41013	0.0578486	-0.125176	-0.633237	0.12067	0.0174486	#VALUE!	#VALUE!	-0.33397	#VALUE!	-2.43297	0.346084	0.808984	0.018296	#VALUE!	#VALUE!	0.267086	0.195881	-2.60766	#VALUE!	#VALUE!	-0.395177	-0.639507	#VALUE!	#VALUE!	#VALUE!	#VALUE!	#VALUE!	#VALUE!	0.0112447	-0.066082	0.886963	-0.256835	-0.242799	-0.28934
HMG-CoAr_LOVA_48h_03	LOVA_48h	-0.195493	#VALUE!	-1.32581	-1.41017	#VALUE!	0.137536	-0.807025	#VALUE!	0.106672	#VALUE!	-0.496156	-0.447394	-0.385849	1.10795	-0.645897	-0.0133146	-0.665752	-0.407185	-0.548539	#VALUE!	#VALUE!	-0.410529	#VALUE!	-3.11507	0.263225	0.678587	0.217573	#VALUE!	#VALUE!	0.318779	0.200295	-2.93508	#VALUE!	#VALUE!	-0.310672	-0.594717	#VALUE!	#VALUE!	#VALUE!	#VALUE!	#VALUE!	#VALUE!	0.178235	-0.0633477	0.886465	-0.435317	-0.183543	-0.365381
HMG-CoAr_LOVA_48h_04	LOVA_48h	-0.0188242	#VALUE!	-0.772645	-0.738202	#VALUE!	0.438914	-0.428852	#VALUE!	-0.148229	#VALUE!	-0.155855	-0.318421	-0.588774	2.0789	-0.130612	-0.0442142	-0.0528159	-0.0366233	-0.126391	#VALUE!	#VALUE!	-0.353945	#VALUE!	-2.50889	0.742829	0.988985	0.400587	#VALUE!	#VALUE!	0.274694	-0.0795652	-2.50434	#VALUE!	#VALUE!	-0.375082	-0.301084	#VALUE!	#VALUE!	#VALUE!	#VALUE!	#VALUE!	#VALUE!	0.146894	0.238192	1.07841	0.0662496	-0.275213	0.0302473
HMG-CoAr_LOVA_48h_05	LOVA_48h	0.0323373	#VALUE!	-1.3483	-1.23414	#VALUE!	0.308785	-0.78609	#VALUE!	-0.04268	#VALUE!	-0.666194	-0.51285	-0.478112	1.61929	-0.210073	0.0695971	-1.06556	-0.246082	-0.306008	#VALUE!	#VALUE!	-0.376462	#VALUE!	-2.74301	0.339261	0.824967	0.179485	#VALUE!	#VALUE!	0.371881	0.143	-2.72024	#VALUE!	#VALUE!	-0.298721	-0.611081	#VALUE!	#VALUE!	#VALUE!	#VALUE!	#VALUE!	#VALUE!	-0.0846741	-0.0206724	0.925577	-0.306739	0.0133477	-0.256382
HMG-CoAr_LOVA_48h_06	LOVA_48h	0.164837	#VALUE!	-0.87439	-0.904944	#VALUE!	0.271397	-0.536364	#VALUE!	-0.166437	#VALUE!	-0.0770064	-0.351776	-0.599517	1.76501	-0.236761	-0.112877	-0.637829	-0.105038	-0.271369	#VALUE!	#VALUE!	-0.299994	#VALUE!	-2.83905	0.498948	0.808234	0.536766	#VALUE!	#VALUE!	0.34321	0.142729	-2.71702	#VALUE!	#VALUE!	-0.4567	-0.566537	#VALUE!	#VALUE!	#VALUE!	#VALUE!	#VALUE!	#VALUE!	0.0711048	0.21753	0.900263	-0.140842	-0.67836	-0.102696
HMG-CoAr_ATOR_48h_02	ATOR_48h	-0.0287242	#VALUE!	-0.300916	-0.62586	#VALUE!	0.453575	-0.148976	#VALUE!	0.564211	#VALUE!	0.550942	-0.224908	-0.3815	0.647694	0.472646	-0.0481318	-0.330626	-0.0181713	0.273354	#VALUE!	#VALUE!	0.0573581	#VALUE!	-1.71995	0.439016	0.313233	0.332898	#VALUE!	#VALUE!	0.210668	-0.187715	-1.77998	#VALUE!	#VALUE!	-0.460596	-0.90435	#VALUE!	#VALUE!	#VALUE!	#VALUE!	#VALUE!	#VALUE!	0.356018	0.1362	0.659485	-0.554439	-0.0583861	-0.145966
HMG-CoAr_ATOR_48h_03	ATOR_48h	-0.193819	#VALUE!	-0.758549	-1.09218	#VALUE!	0.386657	-0.563689	#VALUE!	0.221802	#VALUE!	-0.268635	-0.505829	-0.214862	0.502934	-0.623402	-0.27327	0.0413065	-0.237183	-0.285038	#VALUE!	#VALUE!	0.0326159	#VALUE!	-1.88835	0.250597	-0.300594	0.410241	#VALUE!	#VALUE!	0.295907	-0.00947702	-1.86855	#VALUE!	#VALUE!	-0.634121	-1.17295	#VALUE!	#VALUE!	#VALUE!	#VALUE!	#VALUE!	#VALUE!	0.303144	0.463702	0.371751	0.534905	-0.095085	0.516499
HMG-CoAr_ATOR_48h_04	ATOR_48h	-0.0362032	#VALUE!	-0.246526	-0.728911	#VALUE!	0.365385	-0.111024	#VALUE!	0.350504	#VALUE!	0.0618147	-0.288419	-0.342507	0.584378	-0.168543	-0.128738	-0.550443	-0.17378	0.00143568	#VALUE!	#VALUE!	0.0345191	#VALUE!	-1.67609	0.108166	0.38845	0.427289	#VALUE!	#VALUE!	0.202321	-0.167295	-1.78864	#VALUE!	#VALUE!	-0.443481	-0.961736	#VALUE!	#VALUE!	#VALUE!	#VALUE!	#VALUE!	#VALUE!	0.224022	0.231114	0.732246	-0.042465	-0.291728	-0.103908
HMG-CoAr_ATOR_48h_05	ATOR_48h	0.00742407	#VALUE!	-0.69889	-0.783165	#VALUE!	0.292614	-0.339564	#VALUE!	0.189742	#VALUE!	-0.0536852	-0.299105	-0.223173	0.260804	-1.215	-0.133255	-0.674078	-0.0546469	0.0198363	#VALUE!	#VALUE!	-0.056553	#VALUE!	-2.23058	0.131464	0.261363	0.271519	#VALUE!	#VALUE!	0.188312	0.0586928	-2.00151	#VALUE!	#VALUE!	-0.514535	-1.03107	#VALUE!	#VALUE!	#VALUE!	#VALUE!	#VALUE!	#VALUE!	0.104157	0.110852	0.583529	-0.204993	-0.332781	-0.00533186
HMG-CoAr_ATOR_48h_06	ATOR_48h	-0.0423616	#VALUE!	-0.718332	-0.939793	#VALUE!	0.567221	-0.585516	#VALUE!	0.223505	#VALUE!	0.162555	-0.514188	-0.411306	0.0427291	-0.277962	-0.249355	-0.273218	-0.366485	-0.16069	#VALUE!	#VALUE!	-0.144395	#VALUE!	-2.06759	0.483689	-0.0413872	0.705605	#VALUE!	#VALUE!	0.293452	0.0375407	-1.92727	#VALUE!	#VALUE!	-0.632799	-0.984317	#VALUE!	#VALUE!	#VALUE!	#VALUE!	#VALUE!	#VALUE!	0.282307	0.466185	0.504961	-0.0733987	-0.410734	0.165638
HMG-CoAr_FLUV_48h_01	FLUV_48h	-0.119578	#VALUE!	-0.941273	-1.60226	#VALUE!	0.155635	-0.468274	#VALUE!	-0.0963855	#VALUE!	0.868666	-0.530065	-0.579087	-0.394178	-0.722256	-0.421467	0.0993495	-0.0964989	0.0374555	#VALUE!	#VALUE!	0.117471	#VALUE!	-2.52298	0.549824	-0.547297	0.35108	#VALUE!	#VALUE!	0.175014	0.082784	-2.43282	#VALUE!	#VALUE!	-0.798659	-0.736595	#VALUE!	#VALUE!	#VALUE!	#VALUE!	#VALUE!	#VALUE!	-0.370293	0.258099	0.511857	0.083909	-0.0148221	0.343748
HMG-CoAr_FLUV_48h_02	FLUV_48h	-0.0977988	#VALUE!	-0.935057	-1.21139	#VALUE!	-0.395273	-0.363899	#VALUE!	-0.0416233	#VALUE!	0.627752	-0.3928	-0.674921	-0.215926	-0.658919	-0.108257	-0.200846	-0.144751	-0.0261916	#VALUE!	#VALUE!	-0.0550443	#VALUE!	-3.05718	0.318144	0.0272327	0.0890826	#VALUE!	#VALUE!	0.0579995	0.0316273	-2.52622	#VALUE!	#VALUE!	-0.388543	-0.629444	#VALUE!	#VALUE!	#VALUE!	#VALUE!	#VALUE!	#VALUE!	-0.348492	0.105975	0.667559	0.00482286	0.477769	-0.36868
HMG-CoAr_FLUV_48h_03	FLUV_48h	-0.117845	#VALUE!	-0.809905	-1.00267	#VALUE!	-0.000279366	-0.18245	#VALUE!	-0.0284228	#VALUE!	0.740665	-0.415887	-0.737357	-0.0793807	-0.834751	-0.0944557	-0.111901	0.0729759	0.0337989	#VALUE!	#VALUE!	-0.194375	#VALUE!	-3.36008	0.137602	0.550661	0.145284	#VALUE!	#VALUE!	0.0211254	0.000101911	-2.71884	#VALUE!	#VALUE!	-0.273864	-0.312746	#VALUE!	#VALUE!	#VALUE!	#VALUE!	#VALUE!	#VALUE!	-0.354104	-0.0181632	0.872952	0.0674113	0.354821	-0.351342
HMG-CoAr_FLUV_48h_04	FLUV_48h	-0.0791905	#VALUE!	-0.524927	-2.09812	#VALUE!	0.325221	-0.553877	#VALUE!	-0.0394407	#VALUE!	1.31137	-0.341244	-0.553954	-0.00867874	-1.16938	-0.615515	-0.586747	-0.111376	0.0673349	#VALUE!	#VALUE!	0.128117	#VALUE!	-2.73916	0.530328	-0.971127	0.451694	#VALUE!	#VALUE!	0.0874671	0.164031	-2.56871	#VALUE!	#VALUE!	-1.08115	-1.20638	#VALUE!	#VALUE!	#VALUE!	#VALUE!	#VALUE!	#VALUE!	-0.404812	0.589008	0.42515	-0.0352686	0.0466467	0.373552
HMG-CoAr_FLUV_48h_05	FLUV_48h	0.0696461	#VALUE!	-0.666108	-0.849232	#VALUE!	1.01874	-0.337891	#VALUE!	-0.302431	#VALUE!	0.688822	-0.489575	-0.615517	1.12253	-0.186145	-0.104681	-0.471211	-0.185527	-0.106972	#VALUE!	#VALUE!	-0.147523	#VALUE!	-2.55359	0.164702	0.526262	-0.146331	#VALUE!	#VALUE!	0.107126	-0.0254589	-2.65055	#VALUE!	#VALUE!	-0.35605	-0.323024	#VALUE!	#VALUE!	#VALUE!	#VALUE!	#VALUE!	#VALUE!	-0.707352	-0.127517	0.89938	0.119303	0.142715	0.156938
HMG-CoAr_FLUV_48h_06	FLUV_48h	-0.10402	#VALUE!	-0.692699	-1.19321	#VALUE!	-0.251625	-0.14421	#VALUE!	-0.140643	#VALUE!	0.786564	-0.523618	-0.640826	0.171434	-0.507345	-0.123396	-0.145612	-0.114234	-0.0631279	#VALUE!	#VALUE!	-0.12382	#VALUE!	-2.13013	0.410318	0.189706	0.44436	#VALUE!	#VALUE!	0.128743	0.0276528	-2.57262	#VALUE!	#VALUE!	-0.460117	-0.692828	#VALUE!	#VALUE!	#VALUE!	#VALUE!	#VALUE!	#VALUE!	-0.334158	0.120044	0.746003	0.236083	-0.018779	-0.147344
NAMPT_FK866_48h_01	FK866_48h	-4.82577	#VALUE!	-1.61494	-1.31385	#VALUE!	1.06197	-1.43384	#VALUE!	0.883679	#VALUE!	-2.36335	-0.927504	-0.766685	2.52721	1.35541	-0.782681	0.389768	-2.62078	-2.92725	#VALUE!	#VALUE!	-2.76884	#VALUE!	-3.60329	0.376039	0.166442	0.752655	#VALUE!	#VALUE!	1.5671	-1.25779	-3.07448	#VALUE!	#VALUE!	-2.83224	0.657087	#VALUE!	#VALUE!	#VALUE!	#VALUE!	#VALUE!	#VALUE!	-0.45278	0.674358	-0.799473	-0.506879	-1.06412	-3.16267
NAMPT_FK866_48h_02	FK866_48h	-5.31388	#VALUE!	-7.12189	-1.83131	#VALUE!	0.872204	-1.59874	#VALUE!	1.12798	#VALUE!	-2.046	-1.01146	-0.681912	2.53918	1.68373	-0.736777	0.541473	-2.56151	-2.76097	#VALUE!	#VALUE!	-2.54737	#VALUE!	-2.63845	-0.0733214	0.22571	0.409972	#VALUE!	#VALUE!	1.45465	-1.5908	-2.95153	#VALUE!	#VALUE!	-2.75602	0.808855	#VALUE!	#VALUE!	#VALUE!	#VALUE!	#VALUE!	#VALUE!	-0.338214	0.312033	-0.735418	-2.11378	-1.20504	-3.60986
NAMPT_FK866_48h_03	FK866_48h	-4.91929	#VALUE!	-2.33869	-1.22984	#VALUE!	1.01799	-1.54418	#VALUE!	1.15467	#VALUE!	-1.38806	-1.17785	-0.845177	2.46442	1.47758	-0.743593	0.668548	-2.82257	-2.99249	#VALUE!	#VALUE!	-2.81059	#VALUE!	-3.45562	-0.122469	0.199235	0.471189	#VALUE!	#VALUE!	1.49008	-1.47093	-3.30207	#VALUE!	#VALUE!	-2.78296	0.96918	#VALUE!	#VALUE!	#VALUE!	#VALUE!	#VALUE!	#VALUE!	-0.389991	0.456968	-0.823072	-0.919851	-0.946624	-3.53609
NAMPT_FK866_48h_04	FK866_48h	-4.73272	#VALUE!	-2.07112	-1.63977	#VALUE!	1.01977	-1.58973	#VALUE!	1.17212	#VALUE!	-1.82569	-1.03214	-0.692424	2.1672	1.44163	-0.695377	0.639788	-2.68371	-2.83614	#VALUE!	#VALUE!	-2.84534	#VALUE!	-3.14121	-0.118768	0.137977	0.403099	#VALUE!	#VALUE!	1.45784	-1.26939	-3.21215	#VALUE!	#VALUE!	-2.66355	0.94704	#VALUE!	#VALUE!	#VALUE!	#VALUE!	#VALUE!	#VALUE!	-0.304352	0.379589	-0.787329	-0.910357	-1.03259	-3.43401
NAMPT_FK866_48h_05	FK866_48h	-4.1806	#VALUE!	-2.16229	-1.52577	#VALUE!	1.06907	-1.69724	#VALUE!	1.05526	#VALUE!	-1.61589	-1.18122	-0.800389	1.78456	1.17755	-0.818391	0.294235	-2.92537	-3.05742	#VALUE!	#VALUE!	-3.09756	#VALUE!	-3.42165	-3.57103e-05	0.00727734	0.723648	#VALUE!	#VALUE!	1.53583	-1.11069	-3.31012	#VALUE!	#VALUE!	-2.75295	0.990568	#VALUE!	#VALUE!	#VALUE!	#VALUE!	#VALUE!	#VALUE!	-0.377279	0.584653	-0.934855	-0.755234	-0.989917	-3.38585
NAMPT_FK866_48h_06	FK866_48h	-4.56964	#VALUE!	-1.95066	-1.90489	#VALUE!	0.883391	-1.45397	#VALUE!	1.08318	#VALUE!	-1.89058	-1.01544	-0.861247	0.805048	1.28608	-0.865092	0.586705	-2.95845	-3.0052	#VALUE!	#VALUE!	-2.5732	#VALUE!	-2.98777	0.274855	-0.382433	0.761249	#VALUE!	#VALUE!	1.53304	-1.03277	-3.32559	#VALUE!	#VALUE!	-2.78342	0.758228	#VALUE!	#VALUE!	#VALUE!	#VALUE!	#VALUE!	#VALUE!	-0.366309	0.638622	-1.0416	-0.706604	-0.961886	-3.1815
NAMPT_GMX1778_48h_01	GMX1778_48h	-4.15676	#VALUE!	-2.10156	-3.48575	#VALUE!	1.9011	-1.56706	#VALUE!	0.938351	#VALUE!	-0.985414	-1.19056	-1.76794	2.19318	-5.22631	-1.7434	-0.480424	-7.0223	-2.90132	#VALUE!	#VALUE!	-2.65915	#VALUE!	-3.071	0.994095	-0.628742	1.07379	#VALUE!	#VALUE!	1.25491	-4.24665	-3.3656	#VALUE!	#VALUE!	-4.77953	1.83041	#VALUE!	#VALUE!	#VALUE!	#VALUE!	#VALUE!	#VALUE!	-0.862822	0.679306	-1.56082	-4.26651	-0.507089	-5.12356
NAMPT_GMX1778_48h_02	GMX1778_48h	-4.28493	#VALUE!	-2.56386	-3.36235	#VALUE!	0.259935	-1.80207	#VALUE!	0.95344	#VALUE!	0.267642	-1.4029	-1.83852	2.5686	-0.253189	-1.7921	-0.504226	-6.82828	-2.73787	#VALUE!	#VALUE!	-2.90497	#VALUE!	-3.31917	0.321651	-0.635531	0.981864	#VALUE!	#VALUE!	1.22945	-3.23108	-3.29255	#VALUE!	#VALUE!	-4.45797	1.95424	#VALUE!	#VALUE!	#VALUE!	#VALUE!	#VALUE!	#VALUE!	-1.6097	0.72024	-1.54723	-3.49051	-0.265541	-5.64579
NAMPT_GMX1778_48h_03	GMX1778_48h	-4.9391	#VALUE!	-2.13593	-3.3636	#VALUE!	2.43073	-1.49007	#VALUE!	0.823056	#VALUE!	-2.13887	-1.1295	-1.59153	1.97019	1.44694	-1.80954	-0.725732	-2.71048	-2.98513	#VALUE!	#VALUE!	-2.96245	#VALUE!	-2.82002	0.448322	-0.644903	1.18265	#VALUE!	#VALUE!	1.45484	-5.64551	-3.25936	#VALUE!	#VALUE!	-5.08345	2.05118	#VALUE!	#VALUE!	#VALUE!	#VALUE!	#VALUE!	#VALUE!	-1.25157	0.867637	-1.59426	-1.74138	-0.243447	-4.87234
NAMPT_GMX1778_48h_04	GMX1778_48h	-4.61705	#VALUE!	-2.29099	-3.27752	#VALUE!	2.03708	-1.76397	#VALUE!	0.842675	#VALUE!	-1.00308	-1.27793	-1.71638	2.14463	0.878987	-1.80517	-0.198876	-7.18652	-2.85531	#VALUE!	#VALUE!	-2.98279	#VALUE!	-2.98084	0.411184	-0.562307	1.05568	#VALUE!	#VALUE!	1.34315	-7.3538	-3.30863	#VALUE!	#VALUE!	-4.87591	2.0123	#VALUE!	#VALUE!	#VALUE!	#VALUE!	#VALUE!	#VALUE!	-1.84469	0.593784	-1.48873	-3.8719	-0.209535	-5.28032
NAMPT_GMX1778_48h_05	GMX1778_48h	-4.87472	#VALUE!	-1.44818	-3.49154	#VALUE!	2.00284	-1.34252	#VALUE!	0.662867	#VALUE!	-1.5343	-0.856894	-1.26773	1.27952	1.82777	-1.74109	-1.03728	-2.14228	-3.04349	#VALUE!	#VALUE!	-2.18076	#VALUE!	-2.57885	1.13225	-0.956837	1.42654	#VALUE!	#VALUE!	1.478	-3.21652	-2.72706	#VALUE!	#VALUE!	-5.04861	1.75724	#VALUE!	#VALUE!	#VALUE!	#VALUE!	#VALUE!	#VALUE!	-1.26257	0.802315	-1.7657	0.0306095	-0.522072	-4.57437
NAMPT_GMX1778_48h_06	GMX1778_48h	-4.31778	#VALUE!	-1.78211	-3.4958	#VALUE!	2.08178	-1.1037	#VALUE!	0.955052	#VALUE!	-0.843245	-1.02403	-1.6439	2.07337	0.906477	-1.72377	-0.615415	-3.27586	-2.75748	#VALUE!	#VALUE!	-2.75637	#VALUE!	-3.62648	0.632699	-0.595326	1.11491	#VALUE!	#VALUE!	1.25949	-5.00884	-3.3406	#VALUE!	#VALUE!	-4.66231	1.79227	#VALUE!	#VALUE!	#VALUE!	#VALUE!	#VALUE!	#VALUE!	-0.961699	0.609072	-1.52212	-3.74378	-0.687155	-5.08324
NAMPT_GNE617 _48h_01	GNE617 _48h	-5.32995	#VALUE!	-1.80136	-3.09777	#VALUE!	1.17044	-1.1306	#VALUE!	-0.0630094	#VALUE!	-0.261418	-0.298368	-1.25699	1.34584	3.87474	-0.957553	0.864838	-1.7439	-1.31721	#VALUE!	#VALUE!	-1.75237	#VALUE!	-3.84444	0.542499	0.0164446	1.2308	#VALUE!	#VALUE!	0.694831	-2.47731	-4.17747	#VALUE!	#VALUE!	-3.89998	2.66613	#VALUE!	#VALUE!	#VALUE!	#VALUE!	#VALUE!	#VALUE!	-0.265943	1.02771	-0.928792	-0.766316	-0.363346	-6.32783
NAMPT_GNE617 _48h_02	GNE617 _48h	-5.46273	#VALUE!	-1.73999	-3.56757	#VALUE!	1.27504	-0.758317	#VALUE!	0.0208029	#VALUE!	-0.620838	-0.39054	-1.09605	0.909619	3.81916	-1.02071	1.21048	-2.07228	-1.77333	#VALUE!	#VALUE!	-1.58387	#VALUE!	-3.92281	0.64907	-0.115713	0.929453	#VALUE!	#VALUE!	0.820774	-2.45914	-4.12209	#VALUE!	#VALUE!	-4.05199	2.50471	#VALUE!	#VALUE!	#VALUE!	#VALUE!	#VALUE!	#VALUE!	-0.406438	0.761656	-1.00681	-0.0482667	-0.52214	-4.5534
NAMPT_GNE617 _48h_03	GNE617 _48h	-4.92593	#VALUE!	-2.07037	-3.39663	#VALUE!	1.4248	-1.24353	#VALUE!	-0.0544987	#VALUE!	-0.243499	-0.349969	-1.22217	1.20768	4.09939	-0.993241	0.94206	-2.36372	-1.54362	#VALUE!	#VALUE!	-1.72278	#VALUE!	-3.7625	0.665217	0.243323	1.11353	#VALUE!	#VALUE!	0.805775	-2.91291	-3.87345	#VALUE!	#VALUE!	-3.66803	2.5439	#VALUE!	#VALUE!	#VALUE!	#VALUE!	#VALUE!	#VALUE!	-0.198631	0.938022	-0.838003	-0.794507	-0.500748	-5.03644
NAMPT_GNE617 _48h_04	GNE617 _48h	-5.29808	#VALUE!	-2.06576	-3.05611	#VALUE!	1.35199	-0.954526	#VALUE!	0.0053074	#VALUE!	-0.261228	-0.366025	-1.1586	1.52466	3.98499	-0.980242	0.823957	-2.4917	-1.50701	#VALUE!	#VALUE!	-1.66787	#VALUE!	-4.20535	0.322827	0.26546	1.15444	#VALUE!	#VALUE!	0.764963	-2.60313	-3.88079	#VALUE!	#VALUE!	-3.88543	2.57732	#VALUE!	#VALUE!	#VALUE!	#VALUE!	#VALUE!	#VALUE!	-0.0953744	0.94537	-0.849312	-0.716824	-0.581011	-5.74407
NAMPT_GNE617 _48h_05	GNE617 _48h	-4.53031	#VALUE!	-1.93377	-3.15148	#VALUE!	1.37334	-0.924226	#VALUE!	0.052957	#VALUE!	0.0118589	-0.376637	-1.32209	1.16486	4.49622	-0.929556	1.23269	-2.89149	-1.77227	#VALUE!	#VALUE!	-1.77892	#VALUE!	-3.46617	0.481173	0.0335362	1.01359	#VALUE!	#VALUE!	0.736891	-3.69134	-4.06322	#VALUE!	#VALUE!	-3.91543	2.4826	#VALUE!	#VALUE!	#VALUE!	#VALUE!	#VALUE!	#VALUE!	-0.18863	0.765559	-0.861897	-1.4487	-0.443064	-5.07546
NAMPT_GNE617 _48h_06	GNE617 _48h	-5.57737	#VALUE!	-1.7421	-3.45358	#VALUE!	1.23584	-1.12246	#VALUE!	0.0243189	#VALUE!	-0.431265	-0.253395	-1.13764	1.13138	3.95909	-0.996387	1.01647	-1.75949	-1.49799	#VALUE!	#VALUE!	-1.77529	#VALUE!	-3.33374	0.525041	-0.0350481	1.03011	#VALUE!	#VALUE!	0.725785	-2.36032	-3.9851	#VALUE!	#VALUE!	-3.96569	2.59082	#VALUE!	#VALUE!	#VALUE!	#VALUE!	#VALUE!	#VALUE!	-0.377957	0.724795	-0.945986	0.0154848	-0.638405	-5.06957
OPP_6-AN _48h_01	6-AN _48h	-4.07219	#VALUE!	1.37766	0.961084	#VALUE!	0.0345028	-0.104925	#VALUE!	4.46588	#VALUE!	-1.24405	-0.76902	0.680343	#VALUE!	2.56832	0.268983	0.480715	-2.01809	-2.18121	#VALUE!	#VALUE!	-1.34575	#VALUE!	-3.27697	0.0608119	1.45664	0.430154	#VALUE!	#VALUE!	1.1796	-0.428221	-3.22068	#VALUE!	#VALUE!	-0.642801	-0.363255	#VALUE!	#VALUE!	#VALUE!	#VALUE!	#VALUE!	#VALUE!	0.303168	0.701558	0.337664	-0.393217	-0.708082	-1.95674
OPP_6-AN _48h_02	6-AN _48h	-4.18522	#VALUE!	1.44331	0.294238	#VALUE!	-0.278041	-0.0422959	#VALUE!	4.44789	#VALUE!	-1.29109	-0.845663	0.749163	#VALUE!	2.4353	0.381163	0.47499	-2.53918	-2.18838	#VALUE!	#VALUE!	-1.29567	#VALUE!	-2.97707	0.217488	1.15584	0.297616	#VALUE!	#VALUE!	1.08058	-0.317693	-3.45011	#VALUE!	#VALUE!	-0.654974	-0.781375	#VALUE!	#VALUE!	#VALUE!	#VALUE!	#VALUE!	#VALUE!	0.356105	0.364052	0.193273	-0.719234	-0.909768	-3.38333
OPP_6-AN _48h_03	6-AN _48h	-3.95	#VALUE!	1.53787	0.785619	#VALUE!	0.416271	-0.199337	#VALUE!	4.47073	#VALUE!	-1.33929	-0.77748	0.655971	#VALUE!	2.74406	0.311354	0.368803	-2.29117	-2.06608	#VALUE!	#VALUE!	-1.36963	#VALUE!	-2.83877	0.119286	1.42185	0.377482	#VALUE!	#VALUE!	1.08107	-0.304231	-3.37142	#VALUE!	#VALUE!	-0.663163	-0.455221	#VALUE!	#VALUE!	#VALUE!	#VALUE!	#VALUE!	#VALUE!	0.157465	0.509086	0.395467	-0.736417	-0.847947	-2.3085
OPP_6-AN _48h_04	6-AN _48h	-4.14546	#VALUE!	1.72576	-0.262674	#VALUE!	0.483244	-0.021973	#VALUE!	4.40932	#VALUE!	-1.79653	-0.89593	0.666123	#VALUE!	2.06902	0.137041	0.147244	-2.12922	-2.00138	#VALUE!	#VALUE!	-1.42174	#VALUE!	-2.92739	0.309255	0.602468	0.532329	#VALUE!	#VALUE!	1.1589	-0.241473	-3.46391	#VALUE!	#VALUE!	-0.954379	-0.879559	#VALUE!	#VALUE!	#VALUE!	#VALUE!	#VALUE!	#VALUE!	0.456703	0.525426	-0.0857292	-0.737843	-1.11648	-3.45673
OPP_6-AN _48h_05	6-AN _48h	-4.01083	#VALUE!	1.65707	1.01448	#VALUE!	-0.08968	-0.0774441	#VALUE!	4.45417	#VALUE!	-1.49845	-0.759091	0.756404	#VALUE!	2.83655	0.320769	1.00227	-2.54688	-2.0367	#VALUE!	#VALUE!	-1.32874	#VALUE!	-2.64878	0.410702	1.4224	0.457283	#VALUE!	#VALUE!	1.1862	-0.445454	-2.96547	#VALUE!	#VALUE!	-0.616652	-0.768444	#VALUE!	#VALUE!	#VALUE!	#VALUE!	#VALUE!	#VALUE!	0.300747	0.514015	0.369264	-0.620732	-0.838567	-2.71239
OPP_6-AN _48h_06	6-AN _48h	-3.99294	#VALUE!	1.76287	0.910621	#VALUE!	-0.00701815	0.0783817	#VALUE!	4.54492	#VALUE!	-2.23124	-0.751712	0.967995	#VALUE!	2.91239	0.482488	0.22873	-1.57754	-1.76613	#VALUE!	#VALUE!	-1.32685	#VALUE!	-2.62036	0.0561273	1.47126	0.421998	#VALUE!	#VALUE!	1.20383	-1.10453	-3.09473	#VALUE!	#VALUE!	-0.461228	-0.826614	#VALUE!	#VALUE!	#VALUE!	#VALUE!	#VALUE!	#VALUE!	0.427037	0.46456	0.432048	-0.74266	-0.757767	-4.02068
OPP_G6Pi _48h_01	G6Pi _48h	0.435923	#VALUE!	-0.564798	-0.717773	#VALUE!	0.184719	-0.527601	#VALUE!	2.23481	#VALUE!	-0.948897	0.0818468	-0.544825	-0.24522	1.17512	0.208934	0.209374	-0.0332732	1.09996	#VALUE!	#VALUE!	-0.212648	#VALUE!	-2.99753	-0.00176685	0.20983	0.414361	#VALUE!	#VALUE!	-0.239739	0.404286	-3.06159	#VALUE!	#VALUE!	-0.786717	1.05921	#VALUE!	#VALUE!	#VALUE!	#VALUE!	#VALUE!	#VALUE!	-0.445095	0.378412	-0.571536	0.0721486	0.477601	-1.84831
OPP_G6Pi _48h_02	G6Pi _48h	0.34162	#VALUE!	-0.412163	-0.880997	#VALUE!	0.0366559	-0.42874	#VALUE!	2.34671	#VALUE!	-1.089	0.155056	-0.515629	-0.992058	0.430795	0.146832	-0.19731	-0.161358	1.1107	#VALUE!	#VALUE!	-0.285359	#VALUE!	-3.48331	0.196729	-0.0766346	0.401147	#VALUE!	#VALUE!	-0.344788	0.417207	-3.11175	#VALUE!	#VALUE!	-0.910214	0.71974	#VALUE!	#VALUE!	#VALUE!	#VALUE!	#VALUE!	#VALUE!	-0.200647	0.233822	-0.749694	-0.100501	-0.0589451	-2.34525
OPP_G6Pi _48h_03	G6Pi _48h	0.359548	#VALUE!	-0.782269	-1.14935	#VALUE!	0.168806	-0.642587	#VALUE!	2.3688	#VALUE!	-1.36237	0.0267701	-0.693083	-2.80693	0.186585	-0.0215059	0.049422	-0.0692011	1.158	#VALUE!	#VALUE!	-0.350696	#VALUE!	-2.69658	0.107188	-0.502898	0.489738	#VALUE!	#VALUE!	-0.388126	0.407903	-3.11021	#VALUE!	#VALUE!	-1.07906	0.930348	#VALUE!	#VALUE!	#VALUE!	#VALUE!	#VALUE!	#VALUE!	-0.311922	0.496028	-0.929367	0.478305	0.255344	-2.53148
OPP_G6Pi _48h_04	G6Pi _48h	0.425054	#VALUE!	-0.842866	-0.695293	#VALUE!	-0.265974	-0.811461	#VALUE!	2.54345	#VALUE!	-0.912862	0.0724934	-0.60124	0.237168	0.555908	0.0663487	0.545046	-0.0354805	0.978133	#VALUE!	#VALUE!	-0.108271	#VALUE!	-3.10531	0.419252	0.024605	0.385428	#VALUE!	#VALUE!	-0.232136	0.454066	-3.30789	#VALUE!	#VALUE!	-0.980905	1.16515	#VALUE!	#VALUE!	#VALUE!	#VALUE!	#VALUE!	#VALUE!	-0.541894	0.55601	-0.645577	-0.0914683	0.347861	-1.06707
OPP_G6Pi _48h_05	G6Pi _48h	0.467061	#VALUE!	-0.322088	-0.42813	#VALUE!	1.08149	-0.265273	#VALUE!	2.34333	#VALUE!	-1.31564	-0.0275191	-0.516149	-0.0879334	1.12669	0.290408	0.520678	-0.175631	0.907447	#VALUE!	#VALUE!	-0.033036	#VALUE!	-2.67393	0.130053	0.403452	0.62374	#VALUE!	#VALUE!	-0.146148	0.360698	-3.1978	#VALUE!	#VALUE!	-0.71233	1.31013	#VALUE!	#VALUE!	#VALUE!	#VALUE!	#VALUE!	#VALUE!	-0.367936	0.664108	-0.422295	-0.299407	0.514536	-1.44033
OPP_G6Pi _48h_06	G6Pi _48h	0.471915	#VALUE!	-0.473719	-0.695087	#VALUE!	-0.530567	-0.490272	#VALUE!	2.30411	#VALUE!	-0.71949	0.144512	-0.4894	-1.26501	1.1302	0.221651	0.545441	-0.0541029	1.09581	#VALUE!	#VALUE!	-0.102174	#VALUE!	-2.893	0.282459	0.194624	0.400273	#VALUE!	#VALUE!	-0.163295	0.39646	-3.05036	#VALUE!	#VALUE!	-0.827491	1.0747	#VALUE!	#VALUE!	#VALUE!	#VALUE!	#VALUE!	#VALUE!	-0.471612	0.489535	-0.606886	-0.284473	0.485855	-1.58863
Antimicrotubule_PTXL_48h_01	PTXL_48h	-0.243852	#VALUE!	-0.619342	-0.179804	#VALUE!	0.750924	0.0155022	#VALUE!	-0.317176	#VALUE!	0.148512	-0.415003	-0.45033	1.32697	-0.0264266	-0.252414	0.738523	-0.491688	-0.407035	#VALUE!	#VALUE!	-0.103429	#VALUE!	-2.57924	0.284358	-0.0892655	0.624409	#VALUE!	#VALUE!	0.636753	0.0175599	-2.02868	#VALUE!	#VALUE!	-0.333859	0.543734	#VALUE!	#VALUE!	#VALUE!	#VALUE!	#VALUE!	#VALUE!	0.0326497	0.412401	0.217933	-0.216139	-0.556558	0.105698
Antimicrotubule_PTXL_48h_02	PTXL_48h	-0.2864	#VALUE!	-0.516013	-1.23319	#VALUE!	1.03475	-0.173214	#VALUE!	-0.303048	#VALUE!	0.131189	-0.313433	-0.312512	0.0703875	-1.03128	-0.464854	0.143178	-0.18409	-0.0409728	#VALUE!	#VALUE!	-0.281338	#VALUE!	-1.75812	0.81085	-0.971014	0.776279	#VALUE!	#VALUE!	0.594341	0.170765	-1.92277	#VALUE!	#VALUE!	-0.684577	0.243165	#VALUE!	#VALUE!	#VALUE!	#VALUE!	#VALUE!	#VALUE!	0.181126	0.451531	-0.24248	0.0177854	-0.752238	-0.363146
Antimicrotubule_PTXL_48h_03	PTXL_48h	-0.38232	#VALUE!	-0.592166	-0.619079	#VALUE!	-3.25742	-0.0877094	#VALUE!	-0.504624	#VALUE!	0.287024	-0.357439	-0.425481	0.986586	-0.172049	-0.387971	-0.397073	-0.339737	-0.13296	#VALUE!	#VALUE!	-0.110698	#VALUE!	-2.14723	0.0920989	-0.461617	0.518769	#VALUE!	#VALUE!	0.564322	0.0122509	-1.99543	#VALUE!	#VALUE!	-0.495651	0.215606	#VALUE!	#VALUE!	#VALUE!	#VALUE!	#VALUE!	#VALUE!	-0.00715324	0.362087	0.0905644	-0.047438	-0.623776	0.0825276
Antimicrotubule_PTXL_48h_04	PTXL_48h	-0.0820127	#VALUE!	-0.166361	-0.171382	#VALUE!	0.512787	0.358247	#VALUE!	-0.302569	#VALUE!	0.194569	-0.272791	-0.363874	1.54215	-0.303566	-0.186674	-0.246122	-0.159284	-0.155198	#VALUE!	#VALUE!	-0.0999117	#VALUE!	-1.97988	0.756752	0.0206885	0.717867	#VALUE!	#VALUE!	0.719146	-0.0449894	-1.84335	#VALUE!	#VALUE!	-0.255617	0.840732	#VALUE!	#VALUE!	#VALUE!	#VALUE!	#VALUE!	#VALUE!	0.114758	0.540139	0.262811	0.110854	-0.307067	-0.69219
Antimicrotubule_PTXL_48h_05	PTXL_48h	-0.232341	#VALUE!	-0.563194	-0.838016	#VALUE!	0.569976	0.040174	#VALUE!	-0.301424	#VALUE!	0.197077	-0.428977	-0.37768	0.0336931	-0.665484	-0.432076	0.348627	-0.244381	-0.127562	#VALUE!	#VALUE!	-0.0640289	#VALUE!	-1.85822	0.963729	-0.638643	0.935255	#VALUE!	#VALUE!	0.777425	0.00756783	-1.79686	#VALUE!	#VALUE!	-0.541877	0.325863	#VALUE!	#VALUE!	#VALUE!	#VALUE!	#VALUE!	#VALUE!	0.173157	0.622765	0.0162289	0.13081	-0.368122	-0.473498
Antimicrotubule_PTXL_48h_06	PTXL_48h	-0.236427	#VALUE!	0.0472789	-0.311838	#VALUE!	0.788811	-0.067089	#VALUE!	-0.421877	#VALUE!	0.0132659	-0.385655	-0.306676	0.66454	-0.525903	-0.300028	-0.266666	-0.305487	-0.235447	#VALUE!	#VALUE!	-0.132007	#VALUE!	-1.99024	0.42946	-0.227219	0.748267	#VALUE!	#VALUE!	0.66377	0.0206995	-1.85757	#VALUE!	#VALUE!	-0.330469	0.391839	#VALUE!	#VALUE!	#VALUE!	#VALUE!	#VALUE!	#VALUE!	0.0957237	0.514503	0.169014	0.0162286	-0.690193	-0.165216
Antimicrotubule_VINC_48h_01	VINC_48h	-0.34281	#VALUE!	-0.640525	-0.973564	#VALUE!	1.13305	-0.72354	#VALUE!	-0.649765	#VALUE!	-1.13425	-0.29307	-0.257192	-0.409864	-0.0236757	-0.55343	-0.811058	-0.371771	-0.248029	#VALUE!	#VALUE!	-0.185968	#VALUE!	-2.82795	1.1582	-0.412981	0.690759	#VALUE!	#VALUE!	0.613111	-0.036911	-2.69483	#VALUE!	#VALUE!	-0.937577	1.41803	#VALUE!	#VALUE!	#VALUE!	#VALUE!	#VALUE!	#VALUE!	-0.0277801	0.474419	0.431107	-0.0972864	-1.19386	-0.01911
Antimicrotubule_VINC_48h_02	VINC_48h	-0.0293821	#VALUE!	-0.567487	-0.433639	#VALUE!	0.758652	-0.314974	#VALUE!	-0.148903	#VALUE!	-1.41179	-0.454738	-0.485965	2.06775	-0.301496	-0.23975	-0.333767	-0.567285	-0.0557692	#VALUE!	#VALUE!	-0.346467	#VALUE!	-2.47822	0.532769	0.119107	1.09875	#VALUE!	#VALUE!	0.657724	0.0937544	-3.11681	#VALUE!	#VALUE!	-0.387409	1.45391	#VALUE!	#VALUE!	#VALUE!	#VALUE!	#VALUE!	#VALUE!	0.239572	0.863429	0.615195	0.0813863	-0.788889	-1.07536
Antimicrotubule_VINC_48h_03	VINC_48h	0.0240833	#VALUE!	-0.912495	-0.975563	#VALUE!	0.927753	-0.812316	#VALUE!	-0.186889	#VALUE!	-0.644359	-0.540785	-0.433955	-0.550643	-0.0155432	-0.363074	-0.422011	-0.398192	-0.223984	#VALUE!	#VALUE!	-0.235388	#VALUE!	-3.1124	1.19787	0.0377737	0.981928	#VALUE!	#VALUE!	0.662932	0.0351338	-2.9799	#VALUE!	#VALUE!	-0.498193	1.75318	#VALUE!	#VALUE!	#VALUE!	#VALUE!	#VALUE!	#VALUE!	0.156675	0.757729	0.663063	-0.754813	-0.57914	-0.613311
Antimicrotubule_VINC_48h_04	VINC_48h	-0.415292	#VALUE!	-0.884237	-0.102112	#VALUE!	0.17586	-0.80241	#VALUE!	-0.553694	#VALUE!	-0.273887	-0.372024	-0.389846	1.69905	0.497552	-0.243091	-0.286163	-0.299723	-0.181028	#VALUE!	#VALUE!	-0.252978	#VALUE!	-3.12343	0.928697	0.258354	0.407664	#VALUE!	#VALUE!	0.566613	0.0398178	-2.95021	#VALUE!	#VALUE!	-0.516953	1.8687	#VALUE!	#VALUE!	#VALUE!	#VALUE!	#VALUE!	#VALUE!	-0.048183	0.439504	0.703855	0.474335	-0.660149	-0.14751
Antimicrotubule_VINC_48h_05	VINC_48h	0.0436446	#VALUE!	-0.735698	-0.50444	#VALUE!	0.0984876	-0.741932	#VALUE!	-0.435536	#VALUE!	-1.6647	-0.502981	-0.42303	0.800891	1.15919	-0.393741	-0.427479	-0.72756	-0.267825	#VALUE!	#VALUE!	-0.219879	#VALUE!	-3.22933	1.3272	-0.000311674	0.924298	#VALUE!	#VALUE!	0.703214	0.0021243	-2.77349	#VALUE!	#VALUE!	-0.497169	1.65575	#VALUE!	#VALUE!	#VALUE!	#VALUE!	#VALUE!	#VALUE!	0.0406307	0.627513	0.584534	-5.19865	-0.789651	-0.466965
Antimicrotubule_VINC_48h_06	VINC_48h	-0.549754	#VALUE!	-0.433528	-0.274856	#VALUE!	0.649753	-1.03224	#VALUE!	-0.928183	#VALUE!	-1.14693	-0.358493	-0.205177	1.5159	0.891849	-0.409046	-0.852316	-0.46446	-0.320719	#VALUE!	#VALUE!	0.084927	#VALUE!	-3.08224	0.84791	0.107897	0.513742	#VALUE!	#VALUE!	0.469807	-0.0774529	-2.89978	#VALUE!	#VALUE!	-0.822108	1.3666	#VALUE!	#VALUE!	#VALUE!	#VALUE!	#VALUE!	#VALUE!	0.0436034	0.467074	0.66355	0.486628	-1.15615	-0.0498623
FAB_EGCG_48h_01	EGCG_48h	-0.0197225	#VALUE!	0.554281	-0.0882723	#VALUE!	0.14735	0.154976	#VALUE!	-0.385978	#VALUE!	0.182795	0.176595	-0.0410761	1.18198	-0.329773	0.0173007	-0.0778952	-0.418939	-0.29224	#VALUE!	#VALUE!	-0.370991	#VALUE!	-0.510051	0.11924	0.389373	-0.276873	#VALUE!	#VALUE!	-0.267258	-0.274805	-0.550769	#VALUE!	#VALUE!	0.36583	0.226409	#VALUE!	#VALUE!	#VALUE!	#VALUE!	#VALUE!	#VALUE!	-0.434998	0.167741	0.354478	0.0757597	-0.0315111	-0.122007
FAB_EGCG_48h_02	EGCG_48h	-0.00128253	#VALUE!	0.128205	-0.282823	#VALUE!	0.270881	-0.00459041	#VALUE!	-0.238865	#VALUE!	-0.012397	0.0209394	-0.145783	0.611587	-0.630402	0.0919955	0.066561	-0.773758	-0.364813	#VALUE!	#VALUE!	-0.718868	#VALUE!	-1.09715	0.493541	0.427601	0.205404	#VALUE!	#VALUE!	0.0709475	-0.206427	-0.615093	#VALUE!	#VALUE!	0.442176	0.354142	#VALUE!	#VALUE!	#VALUE!	#VALUE!	#VALUE!	#VALUE!	-0.186825	0.138634	0.361469	-0.108381	0.116176	-0.594068
FAB_EGCG_48h_03	EGCG_48h	-0.0442916	#VALUE!	0.386748	-0.00993656	#VALUE!	0.180024	0.291244	#VALUE!	-0.441242	#VALUE!	0.429353	0.173481	-0.188871	1.09242	-0.387853	0.0356687	0.175664	-0.273425	-0.207332	#VALUE!	#VALUE!	-0.373547	#VALUE!	-0.580811	-0.204939	0.375324	0.0126308	#VALUE!	#VALUE!	-0.209151	-0.265215	-0.538895	#VALUE!	#VALUE!	0.313353	0.219056	#VALUE!	#VALUE!	#VALUE!	#VALUE!	#VALUE!	#VALUE!	-0.321533	0.0630023	0.293169	0.0253704	0.0869019	-0.371575
FAB_EGCG_48h_04	EGCG_48h	0.167087	#VALUE!	-0.124256	-0.828098	#VALUE!	0.586259	-0.256936	#VALUE!	0.0374697	#VALUE!	0.0717805	0.149208	-0.263753	-0.250123	-0.393777	-0.2226	-0.12262	-0.431794	-0.0790873	#VALUE!	#VALUE!	-0.177281	#VALUE!	-0.578657	0.164114	-0.331054	-0.270168	#VALUE!	#VALUE!	-0.474103	-0.0547308	-0.502154	#VALUE!	#VALUE!	0.0652148	-0.0916204	#VALUE!	#VALUE!	#VALUE!	#VALUE!	#VALUE!	#VALUE!	-0.465201	0.097651	-0.154129	-0.253695	0.241947	-0.214122
FAB_EGCG_48h_05	EGCG_48h	-0.060902	#VALUE!	0.604362	0.0641384	#VALUE!	-0.0200538	0.644966	#VALUE!	-0.369438	#VALUE!	0.333665	0.19642	-0.121142	0.825043	0.151414	0.0149471	0.0842234	-0.498006	-0.213551	#VALUE!	#VALUE!	-0.454234	#VALUE!	-0.430796	-0.316517	0.345348	-0.190251	#VALUE!	#VALUE!	-0.273931	-0.251604	-0.274494	#VALUE!	#VALUE!	0.401735	0.213523	#VALUE!	#VALUE!	#VALUE!	#VALUE!	#VALUE!	#VALUE!	-0.411619	0.0249542	0.329533	-0.176131	0.0963401	-0.646578
FAB_EGCG_48h_06	EGCG_48h	-6.74482e-05	#VALUE!	-0.0253181	-0.491283	#VALUE!	0.250279	-0.14637	#VALUE!	-0.213993	#VALUE!	0.220493	0.108719	-0.113576	0.425859	0.200168	-0.031155	0.0730493	-0.117867	-0.161252	#VALUE!	#VALUE!	-0.428031	#VALUE!	-0.3773	-0.499433	0.0725968	-0.148448	#VALUE!	#VALUE!	-0.42641	-0.17258	-0.4799	#VALUE!	#VALUE!	0.30244	0.084898	#VALUE!	#VALUE!	#VALUE!	#VALUE!	#VALUE!	#VALUE!	-0.43274	0.0477182	0.124069	-0.0212416	0.2347	-0.410677
FAB_APIG_48h_01	APIG_48h	0.225597	#VALUE!	0.0332721	0.525475	#VALUE!	0.177407	0.0473066	#VALUE!	-0.218469	#VALUE!	0.198763	0.136206	-0.405624	1.68392	0.226752	0.210805	0.551094	-0.152599	1.18827	#VALUE!	#VALUE!	-0.879606	#VALUE!	-0.330859	0.108567	0.705199	0.312454	#VALUE!	#VALUE!	-0.0248354	0.260743	-0.0241249	#VALUE!	#VALUE!	-0.0250673	#VALUE!	#VALUE!	#VALUE!	#VALUE!	#VALUE!	#VALUE!	#VALUE!	-0.296221	0.262807	0.262876	-0.18014	-0.363045	-0.922144
FAB_APIG_48h_02	APIG_48h	0.088633	#VALUE!	0.2682	0.768803	#VALUE!	-0.0568145	0.340192	#VALUE!	-0.407159	#VALUE!	-0.363183	0.136261	-0.302627	2.08392	0.822299	0.355134	0.692558	-0.0671534	1.24667	#VALUE!	#VALUE!	-0.932176	#VALUE!	0.00717958	0.666991	0.906611	0.389776	#VALUE!	#VALUE!	-0.0224442	0.166101	-0.0466212	#VALUE!	#VALUE!	0.153236	#VALUE!	#VALUE!	#VALUE!	#VALUE!	#VALUE!	#VALUE!	#VALUE!	-0.330256	0.0200179	0.362289	-0.195633	-0.552247	-1.09149
FAB_APIG_48h_03	APIG_48h	0.0901337	#VALUE!	-0.207606	-0.00992509	#VALUE!	0.339871	-0.00173015	#VALUE!	0.0668525	#VALUE!	-0.549089	-0.0650299	-0.35912	0.353766	0.468323	0.393433	0.394307	-0.127231	1.45651	#VALUE!	#VALUE!	-0.788962	#VALUE!	0.0731711	0.127685	0.598144	0.480605	#VALUE!	#VALUE!	0.0503356	0.0342843	-0.0500674	#VALUE!	#VALUE!	0.164542	#VALUE!	#VALUE!	#VALUE!	#VALUE!	#VALUE!	#VALUE!	#VALUE!	-0.0958568	0.462532	0.130467	0.0046759	-0.0997478	-1.06773
FAB_APIG_48h_04	APIG_48h	0.0990113	#VALUE!	0.401847	0.654105	#VALUE!	0.0894048	0.266841	#VALUE!	-0.249288	#VALUE!	-0.158989	0.0921972	-0.341017	2.53604	0.450697	0.295612	0.734315	-0.256487	1.25435	#VALUE!	#VALUE!	-0.781399	#VALUE!	0.0997728	0.458329	0.97612	0.152799	#VALUE!	#VALUE!	0.143697	0.0895742	0.144134	#VALUE!	#VALUE!	0.116367	#VALUE!	#VALUE!	#VALUE!	#VALUE!	#VALUE!	#VALUE!	#VALUE!	-0.257132	0.292518	0.61633	-0.133854	-0.295704	-0.946198
FAB_APIG_48h_05	APIG_48h	0.237502	#VALUE!	-0.418459	-0.636725	#VALUE!	0.0231609	-0.0737972	#VALUE!	0.384215	#VALUE!	0.126293	0.205128	-0.447536	0.387303	0.732961	0.322771	0.355659	-0.207332	1.59889	#VALUE!	#VALUE!	-1.17895	#VALUE!	-0.127711	0.668941	0.33559	0.497233	#VALUE!	#VALUE!	-0.125456	0.127978	-0.172158	#VALUE!	#VALUE!	0.124333	#VALUE!	#VALUE!	#VALUE!	#VALUE!	#VALUE!	#VALUE!	#VALUE!	0.0944739	0.252767	-0.0322976	-0.137977	-0.468371	-1.33686
FAB_APIG_48h_06	APIG_48h	0.124005	#VALUE!	-0.870087	0.410555	#VALUE!	0.507328	-0.640365	#VALUE!	-0.869435	#VALUE!	-0.153432	0.192119	-0.326542	1.5681	0.585363	0.0618958	0.893352	0.0794781	1.28399	#VALUE!	#VALUE!	-0.930915	#VALUE!	-0.0833876	-0.246146	0.278799	0.311848	#VALUE!	#VALUE!	0.141488	0.273275	0.0195408	#VALUE!	#VALUE!	-0.565468	#VALUE!	#VALUE!	#VALUE!	#VALUE!	#VALUE!	#VALUE!	#VALUE!	-0.905615	0.280905	-0.127685	0.413226	-0.215242	-0.566731
AKT_PRFN_48h_01	PRFN_48h	0.299358	#VALUE!	-1.059	0.0155907	#VALUE!	0.904643	-1.22053	#VALUE!	0.497455	#VALUE!	-0.340861	0.00917677	-0.0524256	1.30456	0.238951	-0.387619	0.729578	-0.0371426	-0.0707226	#VALUE!	#VALUE!	0.317887	#VALUE!	-1.09665	0.615615	-0.00131408	0.470905	#VALUE!	#VALUE!	-0.0395345	-0.0669427	-1.40685	#VALUE!	#VALUE!	-0.656335	1.15638	#VALUE!	#VALUE!	#VALUE!	#VALUE!	#VALUE!	#VALUE!	-0.390619	-0.0637386	-0.119259	0.70913	0.205703	0.777556
AKT_PRFN_48h_02	PRFN_48h	0.18367	#VALUE!	-1.00046	-0.514239	#VALUE!	0.557689	-0.765381	#VALUE!	0.966737	#VALUE!	-0.539154	-0.567234	-0.191075	0.410273	-0.245622	-0.14749	-0.0379062	-0.30156	-0.379996	#VALUE!	#VALUE!	0.0606747	#VALUE!	-2.04546	0.488795	-0.225372	0.413855	#VALUE!	#VALUE!	-0.12853	-0.0672998	-1.94158	#VALUE!	#VALUE!	-0.189329	1.02898	#VALUE!	#VALUE!	#VALUE!	#VALUE!	#VALUE!	#VALUE!	0.0805854	-0.0111544	-0.0911119	-0.202944	-0.0057457	-0.130297
AKT_PRFN_48h_03	PRFN_48h	0.279789	#VALUE!	-1.33931	-0.600121	#VALUE!	0.843014	-1.72966	#VALUE!	-0.624192	#VALUE!	-0.0240687	-0.0835776	-0.0730433	-0.492864	-0.018094	-0.972144	0.350096	-0.224191	-0.409858	#VALUE!	#VALUE!	0.418541	#VALUE!	-0.988973	0.519124	-1.23281	0.651112	#VALUE!	#VALUE!	0.0246885	0.0567833	-0.857536	#VALUE!	#VALUE!	-1.96937	0.823476	#VALUE!	#VALUE!	#VALUE!	#VALUE!	#VALUE!	#VALUE!	-1.01396	0.255939	-0.72335	0.860857	0.189937	1.07697
AKT_PRFN_48h_04	PRFN_48h	0.0346181	#VALUE!	-0.472109	0.232021	#VALUE!	0.508513	-0.385715	#VALUE!	1.05972	#VALUE!	-0.460324	-0.285907	-0.0355975	1.35837	-0.390971	-0.109073	0.182384	0.0504709	0.0246174	#VALUE!	#VALUE!	0.217854	#VALUE!	-1.38613	0.433571	0.142442	0.212675	#VALUE!	#VALUE!	-0.156735	-0.058951	-1.71923	#VALUE!	#VALUE!	-0.165108	1.17672	#VALUE!	#VALUE!	#VALUE!	#VALUE!	#VALUE!	#VALUE!	-0.00643469	0.0652496	0.0904831	0.0129006	0.197193	0.320772
AKT_PRFN_48h_05	PRFN_48h	0.057843	#VALUE!	0.26442	0.385889	#VALUE!	0.220886	0.571888	#VALUE!	1.10665	#VALUE!	-0.848196	-0.438381	-0.136675	2.45379	-0.321492	-0.0969218	-0.151593	-0.115142	-0.0275605	#VALUE!	#VALUE!	0.0583631	#VALUE!	-2.0473	0.360428	0.261932	0.210237	#VALUE!	#VALUE!	-0.292383	-0.143651	-1.84059	#VALUE!	#VALUE!	-0.0778302	0.877588	#VALUE!	#VALUE!	#VALUE!	#VALUE!	#VALUE!	#VALUE!	0.252406	-0.0978351	0.261976	-0.705437	-0.0223241	-0.103333
AKT_PRFN_48h_06	PRFN_48h	0.171343	#VALUE!	-0.607478	-0.141794	#VALUE!	-0.0494821	-0.692454	#VALUE!	1.08981	#VALUE!	-0.486308	-0.42106	-0.17591	0.131224	-0.679189	-0.067087	-0.40143	0.0248068	0.0286152	#VALUE!	#VALUE!	0.118092	#VALUE!	-2.46324	0.156938	0.205668	0.0598767	#VALUE!	#VALUE!	-0.223983	-0.0664578	-2.16207	#VALUE!	#VALUE!	-0.0746511	1.01224	#VALUE!	#VALUE!	#VALUE!	#VALUE!	#VALUE!	#VALUE!	-0.00947596	-0.331507	0.111552	-0.462612	0.233481	-0.411849
AKT_ORID_48h_01	ORID_48h	0.0324498	#VALUE!	-1.14943	-0.0409707	#VALUE!	-0.224384	-0.671112	#VALUE!	1.12112	#VALUE!	-0.394646	-0.300896	-0.296889	#VALUE!	-0.374069	-0.238139	0.266677	0.00157559	0.131477	#VALUE!	#VALUE!	0.34535	#VALUE!	-0.890193	-0.0864968	-0.043439	0.0803294	#VALUE!	#VALUE!	-0.319884	-0.0264868	-0.915267	#VALUE!	#VALUE!	-0.460396	1.13778	#VALUE!	#VALUE!	#VALUE!	#VALUE!	#VALUE!	#VALUE!	-0.150959	-0.0196731	0.100831	0.0124494	0.323729	0.421287
AKT_ORID_48h_02	ORID_48h	-0.0286079	#VALUE!	-0.735637	-0.291758	#VALUE!	-0.632651	-0.318721	#VALUE!	1.10988	#VALUE!	-0.374912	-0.348624	-0.250468	#VALUE!	-0.629836	-0.152637	0.0528681	-0.156987	0.0127244	#VALUE!	#VALUE!	0.102171	#VALUE!	-0.881462	-0.365788	-0.160445	0.093591	#VALUE!	#VALUE!	-0.714178	0.0796839	-1.08264	#VALUE!	#VALUE!	-0.283651	0.68772	#VALUE!	#VALUE!	#VALUE!	#VALUE!	#VALUE!	#VALUE!	0.0521799	-0.205064	0.0285703	-0.0229556	0.111725	-0.846952
AKT_ORID_48h_03	ORID_48h	-0.127209	#VALUE!	-0.849496	0.187037	#VALUE!	-0.132791	-0.457882	#VALUE!	1.0477	#VALUE!	-0.081202	-0.165994	-0.233046	#VALUE!	-0.468049	-0.0988441	-0.168639	-0.0404049	0.308124	#VALUE!	#VALUE!	0.23894	#VALUE!	-1.12417	0.0178081	0.310914	0.0998731	#VALUE!	#VALUE!	-0.582331	-0.00917343	-1.06439	#VALUE!	#VALUE!	-0.159967	0.924355	#VALUE!	#VALUE!	#VALUE!	#VALUE!	#VALUE!	#VALUE!	0.0164782	-0.281335	0.223602	0.323687	0.212668	-0.718841
AKT_ORID_48h_04	ORID_48h	-0.10865	#VALUE!	-0.928176	0.280562	#VALUE!	-0.334409	-0.563375	#VALUE!	1.14454	#VALUE!	-0.578	-0.270589	-0.308087	#VALUE!	-0.259891	-0.0439952	-0.0149795	-0.238521	0.028184	#VALUE!	#VALUE!	0.0467221	#VALUE!	-1.53825	0.501552	0.313092	-0.051409	#VALUE!	#VALUE!	-0.435933	-0.0654048	-1.6797	#VALUE!	#VALUE!	-0.145057	1.16869	#VALUE!	#VALUE!	#VALUE!	#VALUE!	#VALUE!	#VALUE!	-0.14024	-0.380915	0.197904	-0.32181	0.346326	-0.342654
AKT_ORID_48h_05	ORID_48h	0.143907	#VALUE!	-0.736002	0.673397	#VALUE!	-0.290326	-0.391649	#VALUE!	1.10073	#VALUE!	-0.486498	-0.20787	-0.206565	#VALUE!	0.139102	0.0377331	-0.202874	0.359883	0.484082	#VALUE!	#VALUE!	0.0714977	#VALUE!	-1.43609	-0.308107	0.478799	0.201523	#VALUE!	#VALUE!	-0.61913	-0.0015434	-1.42715	#VALUE!	#VALUE!	-0.0220631	1.06019	#VALUE!	#VALUE!	#VALUE!	#VALUE!	#VALUE!	#VALUE!	-0.0516028	-0.312157	0.338592	-0.168367	0.0671195	-1.18409
AKT_ORID_48h_06	ORID_48h	0.00513287	#VALUE!	-1.19664	-0.0454554	#VALUE!	0.153605	-0.695577	#VALUE!	1.08055	#VALUE!	-0.413067	-0.31001	-0.326088	#VALUE!	-0.493781	-0.31834	0.053417	-0.151156	0.0191774	#VALUE!	#VALUE!	0.298571	#VALUE!	-0.747304	0.0683461	-0.0713173	0.0556479	#VALUE!	#VALUE!	-0.355736	0.0022873	-1.01978	#VALUE!	#VALUE!	-0.483376	1.08421	#VALUE!	#VALUE!	#VALUE!	#VALUE!	#VALUE!	#VALUE!	-0.0989711	-0.130586	0.125416	-0.332707	0.183183	0.530356
mTOR_RAPA_48h_01	RAPA_48h	0.337688	#VALUE!	-0.361014	0.153315	#VALUE!	0.795013	-0.230652	#VALUE!	-1.64751	#VALUE!	-0.0508983	-0.0105325	-0.396844	2.51306	-1.36292	-0.12931	0.0676384	0.569644	-0.231307	#VALUE!	#VALUE!	0.245084	#VALUE!	-2.25369	0.552768	-0.578835	0.690518	#VALUE!	#VALUE!	1.24089	0.46053	-1.85008	#VALUE!	#VALUE!	-1.0206	#VALUE!	#VALUE!	#VALUE!	#VALUE!	#VALUE!	#VALUE!	#VALUE!	-0.471464	0.604141	-0.676402	0.599947	0.0128852	0.974471
mTOR_RAPA_48h_03	RAPA_48h	0.0982599	#VALUE!	-0.878157	-0.15433	#VALUE!	0.896346	-0.34848	#VALUE!	-1.51752	#VALUE!	-0.225427	-0.0437191	-0.393582	2.86618	-0.920404	0.0942929	-0.464797	0.380659	-0.336278	#VALUE!	#VALUE!	0.027968	#VALUE!	-2.13419	0.350373	-0.482843	0.539331	#VALUE!	#VALUE!	1.00772	0.392962	-2.27346	#VALUE!	#VALUE!	-0.743341	#VALUE!	#VALUE!	#VALUE!	#VALUE!	#VALUE!	#VALUE!	#VALUE!	-0.30724	0.289936	-0.664495	0.0507915	0.0431709	-0.045806
mTOR_RAPA_48h_04	RAPA_48h	0.0563619	#VALUE!	-1.39722	-0.419535	#VALUE!	0.53908	-0.690416	#VALUE!	-1.42839	#VALUE!	-0.0839765	-0.0773659	-0.393677	1.13619	-1.11942	-0.0535566	-0.297286	0.398794	-0.360054	#VALUE!	#VALUE!	0.223198	#VALUE!	-2.52172	0.724285	-0.527078	0.775417	#VALUE!	#VALUE!	1.00153	0.540632	-2.09745	#VALUE!	#VALUE!	-0.930751	#VALUE!	#VALUE!	#VALUE!	#VALUE!	#VALUE!	#VALUE!	#VALUE!	0.105572	0.511929	-0.720244	0.158865	-0.131219	0.4565
mTOR_RAPA_48h_05	RAPA_48h	0.216091	#VALUE!	-0.76044	-0.193566	#VALUE!	1.06227	-0.654661	#VALUE!	-1.32646	#VALUE!	-0.391732	-0.121157	-0.368102	1.90248	-1.14447	0.0398258	0.0664606	0.443698	-0.491773	#VALUE!	#VALUE!	0.42335	#VALUE!	-2.04262	0.591918	-0.300078	0.651864	#VALUE!	#VALUE!	1.10587	0.478183	-1.9475	#VALUE!	#VALUE!	-0.789329	#VALUE!	#VALUE!	#VALUE!	#VALUE!	#VALUE!	#VALUE!	#VALUE!	-0.0993359	0.451355	-0.641482	0.516464	0.402332	0.837387
mTOR_RAPA_48h_06	RAPA_48h	0.0592788	#VALUE!	-0.388209	-0.0405277	#VALUE!	0.703031	-0.14255	#VALUE!	-1.34672	#VALUE!	-0.232428	-0.124077	-0.315723	2.5607	-1.05662	0.0377076	-0.609744	0.412142	-0.243819	#VALUE!	#VALUE!	0.0423162	#VALUE!	-2.31736	0.979609	-0.648948	0.828344	#VALUE!	#VALUE!	1.01397	0.474951	-2.40168	#VALUE!	#VALUE!	-0.794602	#VALUE!	#VALUE!	#VALUE!	#VALUE!	#VALUE!	#VALUE!	#VALUE!	-0.0571154	0.452118	-0.788092	0.0438395	-0.37583	-0.0697646
mTOR_ALPL_48h_01	ALPL_48h	-0.0170823	#VALUE!	-0.16257	-0.120145	#VALUE!	-0.745683	-0.0711137	#VALUE!	-1.57002	#VALUE!	-0.738189	-0.0254771	-0.811503	3.3445	-0.146805	-0.0626177	-0.12037	0.335241	0.0394286	#VALUE!	#VALUE!	-0.938404	#VALUE!	1.61719	0.77376	0.223883	0.9311	#VALUE!	#VALUE!	1.02358	0.40184	1.57066	#VALUE!	#VALUE!	-0.721804	0.675873	#VALUE!	#VALUE!	#VALUE!	#VALUE!	#VALUE!	#VALUE!	0.0134623	0.556283	-0.225366	0.152188	-0.897276	-0.233957
mTOR_ALPL_48h_02	ALPL_48h	-0.0210642	#VALUE!	-0.301337	-0.203423	#VALUE!	-0.381996	-0.256821	#VALUE!	-1.08883	#VALUE!	-0.408596	-0.117978	-1.01365	3.5835	-0.106651	0.109267	0.862678	0.287521	0.218777	#VALUE!	#VALUE!	-1.25797	#VALUE!	1.71319	0.639621	0.389776	0.362951	#VALUE!	#VALUE!	1.31855	0.230359	1.63759	#VALUE!	#VALUE!	-0.571746	1.05924	#VALUE!	#VALUE!	#VALUE!	#VALUE!	#VALUE!	#VALUE!	0.234443	0.193072	-0.143679	0.179661	-0.0389869	-0.863269
mTOR_ALPL_48h_03	ALPL_48h	0.0124583	#VALUE!	-0.915986	-0.360215	#VALUE!	0.411306	-0.68708	#VALUE!	-0.963845	#VALUE!	-0.525947	0.0394126	-0.851629	2.62581	-0.173082	0.0839664	-0.0438081	0.471936	0.215505	#VALUE!	#VALUE!	-0.854533	#VALUE!	1.19853	0.722419	0.198661	0.72174	#VALUE!	#VALUE!	1.21957	0.468472	1.22617	#VALUE!	#VALUE!	-0.615457	0.877424	#VALUE!	#VALUE!	#VALUE!	#VALUE!	#VALUE!	#VALUE!	0.209259	0.382887	-0.230731	0.483407	-0.401561	-0.308087
mTOR_ALPL_48h_04	ALPL_48h	-0.191059	#VALUE!	0.0975857	-0.151467	#VALUE!	3.6321	-0.389172	#VALUE!	-0.689686	#VALUE!	-0.322812	0.0383936	-0.84917	3.46627	-0.232311	0.061048	0.422104	0.514031	0.349822	#VALUE!	#VALUE!	-0.920853	#VALUE!	2.24183	1.05615	0.0487107	0.930749	#VALUE!	#VALUE!	1.01953	0.458664	2.16585	#VALUE!	#VALUE!	-0.667489	0.74973	#VALUE!	#VALUE!	#VALUE!	#VALUE!	#VALUE!	#VALUE!	0.262697	0.54235	-0.341838	0.372357	-0.644027	-1.06594
mTOR_ALPL_48h_05	ALPL_48h	-0.123264	#VALUE!	-0.282394	-0.208947	#VALUE!	0.552653	-0.0252087	#VALUE!	-1.33492	#VALUE!	-0.584511	-0.00995454	-0.68748	3.61493	-0.218215	0.102626	0.117234	0.569872	0.221583	#VALUE!	#VALUE!	-0.884905	#VALUE!	1.42094	0.733822	0.291911	1.02068	#VALUE!	#VALUE!	0.791579	0.446314	1.60108	#VALUE!	#VALUE!	-0.636489	0.3742	#VALUE!	#VALUE!	#VALUE!	#VALUE!	#VALUE!	#VALUE!	0.0854868	0.988745	-0.0907286	0.500931	-0.989609	-0.504544
mTOR_WRTN_48h_01	WRTN_48h	0.0736744	#VALUE!	-1.6329	-1.68413	#VALUE!	0.901394	-1.21385	#VALUE!	-0.614651	#VALUE!	0.635727	-0.372394	-0.688952	0.200008	-1.52349	-0.246221	-0.125878	0.340681	-0.182837	#VALUE!	#VALUE!	-0.781368	#VALUE!	-1.36601	0.957166	-1.02071	0.868491	#VALUE!	#VALUE!	0.770258	0.52964	-1.87979	#VALUE!	#VALUE!	-1.08999	-1.07166	#VALUE!	#VALUE!	#VALUE!	#VALUE!	#VALUE!	#VALUE!	0.215107	0.516243	-0.867679	0.653339	0.263977	-0.286108
mTOR_WRTN_48h_02	WRTN_48h	0.0711779	#VALUE!	-0.777023	-0.740941	#VALUE!	0.848562	-0.538218	#VALUE!	-1.12515	#VALUE!	0.54753	-0.106612	-0.572347	2.14157	-0.88312	-0.0620926	-0.280399	0.0298961	-0.479393	#VALUE!	#VALUE!	-0.873866	#VALUE!	-1.86421	-0.0460296	-0.262539	0.471136	#VALUE!	#VALUE!	0.720018	0.303968	-2.01694	#VALUE!	#VALUE!	-0.760499	-0.413822	#VALUE!	#VALUE!	#VALUE!	#VALUE!	#VALUE!	#VALUE!	0.00661327	0.346321	-0.486063	0.803152	-0.297097	1.06279
mTOR_WRTN_48h_03	WRTN_48h	0.0116902	#VALUE!	-1.2409	-1.03065	#VALUE!	0.530172	-0.888904	#VALUE!	-1.22634	#VALUE!	0.3366	-0.141039	-0.465332	1.14778	-1.01244	0.1253	0.373632	0.329533	-0.360932	#VALUE!	#VALUE!	-0.973633	#VALUE!	-1.46516	0.240977	-0.179692	0.730179	#VALUE!	#VALUE!	0.708216	0.38786	-2.17643	#VALUE!	#VALUE!	-0.570559	-0.708823	#VALUE!	#VALUE!	#VALUE!	#VALUE!	#VALUE!	#VALUE!	0.2178	0.469651	-0.431542	0.610175	-0.201921	0.744114
mTOR_WRTN_48h_04	WRTN_48h	0.0597029	#VALUE!	-1.85076	-1.37857	#VALUE!	0.865464	-1.05059	#VALUE!	-0.904526	#VALUE!	0.329701	-0.194391	-0.679789	0.316132	-1.22237	-0.103165	-0.625445	0.322242	-0.333284	#VALUE!	#VALUE!	-0.758159	#VALUE!	-1.30018	0.779238	-0.76392	0.729446	#VALUE!	#VALUE!	0.753793	0.475261	-1.83464	#VALUE!	#VALUE!	-0.929896	-0.9029	#VALUE!	#VALUE!	#VALUE!	#VALUE!	#VALUE!	#VALUE!	0.317363	0.512728	-0.76931	0.268086	0.320418	0.000271086
mTOR_WRTN_48h_05	WRTN_48h	-0.0187586	#VALUE!	-0.987498	-0.614223	#VALUE!	0.305293	-0.433562	#VALUE!	-1.18336	#VALUE!	0.544979	-0.148082	-0.618749	1.41388	-0.948671	0.152682	-0.43436	0.577496	-0.0871682	#VALUE!	#VALUE!	-0.810855	#VALUE!	-2.09252	0.854139	-0.306816	0.758523	#VALUE!	#VALUE!	0.821777	0.381496	-1.91967	#VALUE!	#VALUE!	-0.501613	-0.383851	#VALUE!	#VALUE!	#VALUE!	#VALUE!	#VALUE!	#VALUE!	-0.146001	0.476459	-0.303906	0.612078	0.215755	-0.311181
mTOR_WRTN_48h_06	WRTN_48h	-0.0113229	#VALUE!	-1.80167	-1.73311	#VALUE!	0.350583	-1.24205	#VALUE!	-1.17625	#VALUE!	0.539653	-0.230064	-0.749575	-0.764576	-1.72927	-0.23506	-0.349758	0.358997	-0.240289	#VALUE!	#VALUE!	-0.820434	#VALUE!	-1.54028	0.976654	-1.1025	0.765932	#VALUE!	#VALUE!	0.815141	0.480011	-1.95171	#VALUE!	#VALUE!	-1.07661	-1.11087	#VALUE!	#VALUE!	#VALUE!	#VALUE!	#VALUE!	#VALUE!	0.243486	0.426688	-0.913986	0.743604	0.0355845	0.397011
GDH_HEXA_48h_01	HEXA_48h	0.256333	#VALUE!	-0.62274	-0.659897	#VALUE!	1.54338	-0.192892	#VALUE!	-0.00416287	#VALUE!	-1.1989	-0.122651	-1.49512	2.47474	1.322	0.792373	1.51241	0.0817051	0.319449	#VALUE!	#VALUE!	-1.63444	#VALUE!	0.954831	0.841874	2.17848	1.16639	#VALUE!	#VALUE!	-0.104414	-0.0667623	0.698952	#VALUE!	#VALUE!	-0.784614	0.240981	#VALUE!	#VALUE!	#VALUE!	#VALUE!	#VALUE!	#VALUE!	-0.239324	0.799311	2.34575	0.367866	0.466762	0.149379
GDH_HEXA_48h_02	HEXA_48h	-0.0149988	#VALUE!	-0.3327	-1.48563	#VALUE!	1.83227	-0.0645107	#VALUE!	-0.177132	#VALUE!	-1.22774	-0.207527	-1.00317	-0.0964237	1.39043	0.512186	0.784987	0.125585	0.280651	#VALUE!	#VALUE!	-1.61185	#VALUE!	0.709153	1.06262	1.30823	1.50183	#VALUE!	#VALUE!	0.168283	0.121933	0.662214	#VALUE!	#VALUE!	-0.926532	-0.554266	#VALUE!	#VALUE!	#VALUE!	#VALUE!	#VALUE!	#VALUE!	0.416126	0.986161	2.16797	0.426098	0.0212517	-0.768472
GDH_HEXA_48h_03	HEXA_48h	0.193247	#VALUE!	-0.652757	-0.901228	#VALUE!	0.777108	-0.23582	#VALUE!	0.00453474	#VALUE!	-0.863919	0.00766483	-1.67514	2.9922	1.6318	0.727668	0.497208	-0.0967519	0.204396	#VALUE!	#VALUE!	-1.70296	#VALUE!	0.558652	0.849901	2.01428	0.947172	#VALUE!	#VALUE!	-0.159299	0.062158	0.537123	#VALUE!	#VALUE!	-0.778855	-0.119595	#VALUE!	#VALUE!	#VALUE!	#VALUE!	#VALUE!	#VALUE!	-0.23015	0.826071	2.25174	0.265106	0.238779	0.258344
GDH_HEXA_48h_04	HEXA_48h	0.21118	#VALUE!	-0.335476	-1.1322	#VALUE!	1.65049	-0.100178	#VALUE!	-0.292667	#VALUE!	-2.01332	-0.159723	-1.15983	2.70149	1.63754	0.728132	0.942117	0.353079	0.534727	#VALUE!	#VALUE!	-1.58046	#VALUE!	0.931988	1.0485	1.94891	1.34223	#VALUE!	#VALUE!	0.162416	-0.0161879	0.810301	#VALUE!	#VALUE!	-0.786265	-0.0829176	#VALUE!	#VALUE!	#VALUE!	#VALUE!	#VALUE!	#VALUE!	0.0120002	0.827786	2.38044	0.586971	0.265345	-0.963961
GDH_HEXA_48h_05	HEXA_48h	0.344365	#VALUE!	-0.524908	-0.727457	#VALUE!	1.74433	0.0325819	#VALUE!	-0.15627	#VALUE!	-0.785197	-0.123588	-1.33065	3.23743	1.91352	0.882792	1.43337	0.488158	0.635964	#VALUE!	#VALUE!	-1.39353	#VALUE!	1.09428	1.191	2.27823	1.61033	#VALUE!	#VALUE!	0.152977	-0.292288	1.12446	#VALUE!	#VALUE!	-0.629017	0.15239	#VALUE!	#VALUE!	#VALUE!	#VALUE!	#VALUE!	#VALUE!	-0.0989242	1.21665	2.46811	1.02032	0.53392	-1.70981
GDH_HEXA_48h_06	HEXA_48h	0.214014	#VALUE!	-0.658107	-0.744404	#VALUE!	1.60022	-0.073596	#VALUE!	-0.137232	#VALUE!	-0.112107	-0.0893435	-1.36001	2.79263	1.47848	0.830966	0.824017	0.227389	0.411532	#VALUE!	#VALUE!	-1.70594	#VALUE!	0.604241	1.17247	2.24478	1.23791	#VALUE!	#VALUE!	-0.0889762	-0.0538739	0.790829	#VALUE!	#VALUE!	-0.625055	0.0705994	#VALUE!	#VALUE!	#VALUE!	#VALUE!	#VALUE!	#VALUE!	-0.388143	0.717654	2.36279	0.846086	0.347222	-0.337321
GDH_BITN_48h_01	BITN_48h	0.677534	#VALUE!	-0.494333	0.250268	#VALUE!	#VALUE!	-0.156986	#VALUE!	-0.520606	#VALUE!	-0.740475	-0.567845	-1.50897	3.47989	2.20448	0.585419	1.32613	0.328671	0.386286	#VALUE!	#VALUE!	-1.20858	#VALUE!	0.824299	1.29761	2.35492	1.19466	#VALUE!	#VALUE!	0.110733	-0.112841	0.927379	#VALUE!	#VALUE!	-0.779373	0.772545	#VALUE!	#VALUE!	#VALUE!	#VALUE!	#VALUE!	#VALUE!	-0.303519	1.08702	2.45586	0.513791	-0.476171	-0.881582
GDH_BITN_48h_02	BITN_48h	0.610617	#VALUE!	-0.725814	-0.499498	#VALUE!	#VALUE!	-0.576389	#VALUE!	-0.402321	#VALUE!	-1.3577	-0.782775	-1.13916	0.967892	1.69982	0.519736	0.595231	0.286713	0.311933	#VALUE!	#VALUE!	-1.46101	#VALUE!	0.587532	1.68423	1.69123	1.70397	#VALUE!	#VALUE!	0.453952	0.108917	0.646233	#VALUE!	#VALUE!	-0.643443	0.0582501	#VALUE!	#VALUE!	#VALUE!	#VALUE!	#VALUE!	#VALUE!	0.404176	1.92319	2.32464	0.23176	-0.661562	-1.65463
GDH_BITN_48h_03	BITN_48h	0.555556	#VALUE!	-0.368629	0.293647	#VALUE!	#VALUE!	-0.110801	#VALUE!	-0.58798	#VALUE!	-0.750874	-0.766471	-1.5099	3.37387	2.00301	0.659617	0.730345	0.503484	0.667772	#VALUE!	#VALUE!	-1.52833	#VALUE!	1.16666	0.935313	2.43963	1.31922	#VALUE!	#VALUE!	0.341393	-0.140023	1.30451	#VALUE!	#VALUE!	-0.48324	0.738429	#VALUE!	#VALUE!	#VALUE!	#VALUE!	#VALUE!	#VALUE!	0.0174209	1.20206	2.54442	0.163012	-0.109784	-2.52663
GDH_BITN_48h_04	BITN_48h	0.474909	#VALUE!	-0.77165	0.0811688	#VALUE!	#VALUE!	-0.307957	#VALUE!	-0.559204	#VALUE!	-1.73048	-0.890695	-1.41947	2.99772	2.08495	0.675176	1.13701	0.277725	0.562159	#VALUE!	#VALUE!	-1.59658	#VALUE!	0.73972	1.24433	2.29059	1.33789	#VALUE!	#VALUE!	0.341033	-0.0934668	0.850585	#VALUE!	#VALUE!	-0.463808	0.515261	#VALUE!	#VALUE!	#VALUE!	#VALUE!	#VALUE!	#VALUE!	0.165559	1.17466	2.4054	0.157751	-0.180474	-2.72688
GDH_BITN_48h_05	BITN_48h	0.477881	#VALUE!	-0.7248	-0.00343981	#VALUE!	#VALUE!	-0.247636	#VALUE!	-0.550303	#VALUE!	-1.54741	-0.88711	-1.64199	2.56358	2.00074	0.798297	0.552584	0.397777	0.416213	#VALUE!	#VALUE!	-1.32181	#VALUE!	0.711145	1.30032	2.25978	1.49576	#VALUE!	#VALUE!	0.451626	-0.0852403	1.07363	#VALUE!	#VALUE!	-0.294712	0.745607	#VALUE!	#VALUE!	#VALUE!	#VALUE!	#VALUE!	#VALUE!	-0.0765333	1.42279	2.25345	-0.190282	0.40821	-2.18132
GDH_BITN_48h_06	BITN_48h	0.678247	#VALUE!	-0.592484	0.180241	#VALUE!	#VALUE!	-0.114425	#VALUE!	-0.468258	#VALUE!	-2.01684	-0.734242	-1.53937	3.30948	2.31821	0.63433	0.950517	0.318724	0.454481	#VALUE!	#VALUE!	-1.47809	#VALUE!	1.07438	1.08895	2.30118	1.20496	#VALUE!	#VALUE!	0.169412	-0.0917306	1.01868	#VALUE!	#VALUE!	-0.566906	0.700497	#VALUE!	#VALUE!	#VALUE!	#VALUE!	#VALUE!	#VALUE!	-0.18523	1.05079	2.51247	0.26278	-0.479065	-1.5015
PtdCho_BETA _48h_01	BETA _48h	0.448577	#VALUE!	-0.024859	-0.685614	#VALUE!	1.19986	0.253469	#VALUE!	0.65021	#VALUE!	-1.62181	-0.327522	-0.296551	0.938652	1.36746	0.0606307	0.326494	-0.290005	2.01916	#VALUE!	#VALUE!	0.936063	#VALUE!	0.116434	0.939488	0.844596	1.13216	#VALUE!	#VALUE!	0.331293	-0.722864	-0.553549	#VALUE!	#VALUE!	-0.305373	1.69878	#VALUE!	#VALUE!	#VALUE!	#VALUE!	#VALUE!	#VALUE!	0.0766978	0.702144	0.892955	0.990855	-0.429515	-1.21022
PtdCho_BETA _48h_02	BETA _48h	0.481196	#VALUE!	-0.329107	-0.613552	#VALUE!	1.27385	0.13605	#VALUE!	0.697319	#VALUE!	0.652977	-0.38938	-0.399866	-1.12281	1.41712	0.38309	0.403567	-0.696825	2.11775	#VALUE!	#VALUE!	0.88573	#VALUE!	0.0391369	1.3432	1.07038	1.08528	#VALUE!	#VALUE!	0.191783	-1.4495	-0.534889	#VALUE!	#VALUE!	-0.0656116	1.83801	#VALUE!	#VALUE!	#VALUE!	#VALUE!	#VALUE!	#VALUE!	-0.0188436	0.782737	1.03386	0.811921	-0.231433	-1.0555
PtdCho_BETA _48h_03	BETA _48h	-0.0154576	#VALUE!	0.717262	-0.86905	#VALUE!	1.83344	0.631114	#VALUE!	0.816558	#VALUE!	-2.02218	-0.16651	-0.432448	-0.301929	1.19459	-0.322295	0.445961	-0.757289	1.84244	#VALUE!	#VALUE!	0.857128	#VALUE!	0.198249	1.30581	0.0631749	1.24321	#VALUE!	#VALUE!	0.546328	-1.081	-0.421879	#VALUE!	#VALUE!	-0.954529	1.60904	#VALUE!	#VALUE!	#VALUE!	#VALUE!	#VALUE!	#VALUE!	-0.046206	0.890088	0.726983	1.36803	-0.759426	-0.219464
PtdCho_BETA _48h_04	BETA _48h	0.0450357	#VALUE!	0.218447	-0.841807	#VALUE!	1.34876	0.361181	#VALUE!	0.739254	#VALUE!	-2.19988	-0.339646	-0.468766	-0.44115	1.02412	-0.106382	0.367105	-0.55538	2.11891	#VALUE!	#VALUE!	0.63649	#VALUE!	-0.338591	1.2504	0.419146	1.07574	#VALUE!	#VALUE!	0.202006	-0.378161	-0.630195	#VALUE!	#VALUE!	-0.649306	1.66606	#VALUE!	#VALUE!	#VALUE!	#VALUE!	#VALUE!	#VALUE!	-0.095086	0.472163	0.649049	0.882764	-0.628588	-0.650127
PtdCho_BETA _48h_05	BETA _48h	0.476441	#VALUE!	0.357838	-0.971912	#VALUE!	1.38362	0.582304	#VALUE!	0.700015	#VALUE!	-2.15088	-0.442057	-0.459688	-0.182231	0.746971	-0.369403	-0.10778	-0.474236	2.11274	#VALUE!	#VALUE!	0.77303	#VALUE!	-0.489209	1.28587	-0.389761	1.24176	#VALUE!	#VALUE!	0.362868	-0.461132	-0.818958	#VALUE!	#VALUE!	-0.858835	1.71793	#VALUE!	#VALUE!	#VALUE!	#VALUE!	#VALUE!	#VALUE!	0.148974	0.838418	0.498032	0.492639	-0.362793	-1.65987
PtdCho_BETA _48h_06	BETA _48h	0.539304	#VALUE!	0.0619861	-0.577331	#VALUE!	1.26374	0.277677	#VALUE!	0.64015	#VALUE!	-1.68935	-0.292727	-0.277652	0.253202	1.5171	0.106966	0.535905	-0.333272	1.9653	#VALUE!	#VALUE!	0.898917	#VALUE!	-0.382684	0.780995	0.884395	1.23331	#VALUE!	#VALUE!	0.353642	-0.723255	-0.650874	#VALUE!	#VALUE!	-0.239233	1.76923	#VALUE!	#VALUE!	#VALUE!	#VALUE!	#VALUE!	#VALUE!	0.11607	0.765747	0.857415	0.793706	-0.423478	-1.45275
PtdCho_BOWA _48h_01	BOWA _48h	0.19712	#VALUE!	-1.02724	-0.729239	#VALUE!	0.869067	-1.03582	#VALUE!	0.713112	#VALUE!	-2.94492	0.179735	-0.696789	#VALUE!	0.264262	-0.218069	-0.61162	-0.074707	1.90162	#VALUE!	#VALUE!	-0.637534	#VALUE!	-0.689255	0.521408	-0.291787	0.740406	#VALUE!	#VALUE!	0.0442849	0.202496	-0.988888	#VALUE!	#VALUE!	-0.777542	0.954932	#VALUE!	#VALUE!	#VALUE!	#VALUE!	#VALUE!	#VALUE!	0.211843	0.835356	-0.165369	-0.43066	0.0115607	0.162121
PtdCho_BOWA _48h_02	BOWA _48h	0.172463	#VALUE!	-1.0341	-0.149347	#VALUE!	0.335456	-0.801762	#VALUE!	0.580021	#VALUE!	-4.13421	0.515873	-0.483644	#VALUE!	1.55807	0.254579	-0.631123	0.199998	2.03838	#VALUE!	#VALUE!	-0.873404	#VALUE!	-0.740358	0.32559	0.582457	0.780711	#VALUE!	#VALUE!	0.134364	0.0797531	-1.11433	#VALUE!	#VALUE!	-0.142467	1.03695	#VALUE!	#VALUE!	#VALUE!	#VALUE!	#VALUE!	#VALUE!	-0.361891	0.598228	0.286243	0.226355	0.0965332	-1.4216
PtdCho_BOWA _48h_03	BOWA _48h	0.303257	#VALUE!	-0.940146	0.434838	#VALUE!	0.667158	-0.464498	#VALUE!	0.489108	#VALUE!	-2.73008	0.483357	-0.363639	#VALUE!	1.35318	0.270727	-0.485388	-0.385903	1.72606	#VALUE!	#VALUE!	-0.702547	#VALUE!	-0.980526	0.669186	0.566326	0.852447	#VALUE!	#VALUE!	0.119212	0.0781983	-0.964477	#VALUE!	#VALUE!	-0.205845	1.17342	#VALUE!	#VALUE!	#VALUE!	#VALUE!	#VALUE!	#VALUE!	-0.322866	0.722512	0.232452	0.178169	0.0577594	-1.66069
PtdCho_BOWA _48h_04	BOWA _48h	0.217294	#VALUE!	-0.845129	0.316003	#VALUE!	0.567991	-0.676481	#VALUE!	0.675459	#VALUE!	-2.72949	0.406956	-0.404018	#VALUE!	1.39276	0.237384	0.366564	0.0547509	1.87415	#VALUE!	#VALUE!	-0.667404	#VALUE!	-1.25105	0.662211	0.778635	0.863679	#VALUE!	#VALUE!	0.113185	0.0694376	-1.51062	#VALUE!	#VALUE!	-0.240461	1.16004	#VALUE!	#VALUE!	#VALUE!	#VALUE!	#VALUE!	#VALUE!	-0.204401	0.771033	0.395504	0.0583027	0.0280031	-1.2218
PtdCho_BOWA _48h_05	BOWA _48h	0.249701	#VALUE!	-0.828918	0.603177	#VALUE!	0.576843	-0.580114	#VALUE!	0.591947	#VALUE!	-3.38183	0.414528	-0.476483	#VALUE!	1.63186	0.248627	0.157851	-0.118331	1.77522	#VALUE!	#VALUE!	-0.69347	#VALUE!	-1.42403	0.325558	0.903536	0.70934	#VALUE!	#VALUE!	-0.000243948	0.0708371	-1.4649	#VALUE!	#VALUE!	-0.251724	1.65474	#VALUE!	#VALUE!	#VALUE!	#VALUE!	#VALUE!	#VALUE!	-0.155241	0.59263	0.427768	0.186752	0.0148711	-0.846794
PtdCho_BOWA _48h_06	BOWA _48h	0.0734394	#VALUE!	-0.866036	-0.81426	#VALUE!	0.45707	-0.961775	#VALUE!	0.731751	#VALUE!	-2.00666	0.159704	-0.567651	#VALUE!	0.835574	-0.14483	-0.512273	0.142878	2.06782	#VALUE!	#VALUE!	-0.563317	#VALUE!	-0.536852	0.142771	-0.330432	0.759602	#VALUE!	#VALUE!	-0.0329823	0.294225	-0.927389	#VALUE!	#VALUE!	-0.608954	1.01245	#VALUE!	#VALUE!	#VALUE!	#VALUE!	#VALUE!	#VALUE!	0.0914198	0.661	-0.148423	-0.481476	0.116537	-0.113401
PtdCho_MASA _48h_01	MASA _48h	-0.165751	#VALUE!	-1.25258	-0.947061	#VALUE!	1.14752	-0.992897	#VALUE!	1.44973	#VALUE!	-1.43142	-0.215199	-0.369613	1.71207	-0.398293	-0.0814978	0.319481	-0.244697	0.475271	#VALUE!	#VALUE!	-0.191558	#VALUE!	-1.71689	1.42287	-0.0848532	1.27053	#VALUE!	#VALUE!	0.300549	-0.175567	-1.62979	#VALUE!	#VALUE!	-0.803242	-0.507021	#VALUE!	#VALUE!	#VALUE!	#VALUE!	#VALUE!	#VALUE!	0.162073	1.06599	0.752266	0.50733	-0.759598	-0.822515
PtdCho_MASA _48h_02	MASA _48h	-0.438278	#VALUE!	-1.36651	-0.651381	#VALUE!	1.47008	-1.11821	#VALUE!	1.37841	#VALUE!	-2.073	-0.492281	-0.190753	-1.05385	0.670145	0.0343591	0.80223	-0.25595	0.454806	#VALUE!	#VALUE!	-0.225032	#VALUE!	-2.47436	1.23057	0.427717	1.29076	#VALUE!	#VALUE!	0.294691	-0.300561	-1.50491	#VALUE!	#VALUE!	-0.643098	-0.14425	#VALUE!	#VALUE!	#VALUE!	#VALUE!	#VALUE!	#VALUE!	0.593035	0.953568	0.911032	0.378671	-1.2186	-0.636357
PtdCho_MASA _48h_03	MASA _48h	-0.513988	#VALUE!	-1.18332	-0.584133	#VALUE!	0.932875	-1.12777	#VALUE!	1.37338	#VALUE!	-2.02241	-0.369409	-0.200398	2.35018	-0.14089	-0.0203373	0.819035	-0.26195	0.323398	#VALUE!	#VALUE!	-0.164149	#VALUE!	-1.22314	0.544116	0.179954	1.2565	#VALUE!	#VALUE!	0.26768	-0.121996	-1.34244	#VALUE!	#VALUE!	-0.817779	-0.356697	#VALUE!	#VALUE!	#VALUE!	#VALUE!	#VALUE!	#VALUE!	0.244103	0.9161	0.823586	0.686069	-1.19043	-0.322655
PtdCho_MASA _48h_04	MASA _48h	-0.429669	#VALUE!	-1.14929	-0.943131	#VALUE!	1.09109	-1.11544	#VALUE!	1.39692	#VALUE!	-0.833451	-0.29626	-0.387327	-1.04544	-0.0749768	-0.532801	0.696862	-0.229565	0.589728	#VALUE!	#VALUE!	-0.24984	#VALUE!	-0.868914	1.47083	-1.05292	1.39571	#VALUE!	#VALUE!	0.299012	-0.0243353	-1.23537	#VALUE!	#VALUE!	-1.54142	-0.845341	#VALUE!	#VALUE!	#VALUE!	#VALUE!	#VALUE!	#VALUE!	0.474163	0.988342	0.587403	0.508956	-1.31475	-0.855266
PtdCho_MASA _48h_05	MASA _48h	-0.205377	#VALUE!	-0.786236	-0.300899	#VALUE!	1.27008	-0.193764	#VALUE!	1.31376	#VALUE!	-1.46239	-0.365761	-0.112639	1.69513	0.17511	0.0579519	-0.0521602	-0.16956	0.516936	#VALUE!	#VALUE!	-0.0829066	#VALUE!	-0.830823	1.15698	0.310644	1.2889	#VALUE!	#VALUE!	0.451678	-0.220426	-1.37225	#VALUE!	#VALUE!	-0.624184	-0.35311	#VALUE!	#VALUE!	#VALUE!	#VALUE!	#VALUE!	#VALUE!	0.674865	1.09206	0.727942	1.06326	-1.05854	-1.38588
PtdCho_MASA _48h_06	MASA _48h	0.126009	#VALUE!	-1.12402	-1.08414	#VALUE!	1.18114	-0.733287	#VALUE!	1.39339	#VALUE!	-1.10735	-0.242418	-0.406036	2.72481	-0.412041	-0.0630744	1.03771	-0.264088	0.476173	#VALUE!	#VALUE!	-0.25205	#VALUE!	-1.28769	1.33639	-0.116776	1.23702	#VALUE!	#VALUE!	0.277652	-0.158336	-1.52982	#VALUE!	#VALUE!	-0.796368	-0.491963	#VALUE!	#VALUE!	#VALUE!	#VALUE!	#VALUE!	#VALUE!	0.380009	1.02547	0.667848	0.383872	-0.76192	-1.3179
[truncated: 138 more columns]

## Sheet: Prediction
Sample Name	label	2,3-cAMP	2PG	2PGA	3,5-cAMP	3DeHy-SHIK	3-OH-PYR	3PGA	5Me-THF	6PG	8OH-COPA-PP	AcAc-CoA	AcCoA	ACT	Adenosine	Adenylo-Suc	ADP	ADP-glucose	ADPPR	ADPR	AICAR	AIR	2-OG	ALA	ALLANTOATE	ALT	AMP	ARG	ASC	ASN	ASP	ATP	CA	CAIR	CarbamoylAla	CDP	CDP-CHOL	CDP-ME	CDP-MEP	cGMP	chloride	CHOR	CHOR-H2O	CIT	CITRUL	CMP	CoA	CREA	CREA-P
AAHR _48h_01	AAHR _48h	0.484785	#VALUE!	-2.21188	0.311291	#VALUE!	1.59123	-1.02915	#VALUE!	-0.498865	#VALUE!	-1.48323	-0.0349305	-0.160082	3.12692	2.49798	0.761921	0.787288	0.40338	2.36071	#VALUE!	#VALUE!	-0.783756	#VALUE!	-1.46439	0.169996	1.8332	1.62217	#VALUE!	#VALUE!	0.00419536	0.24601	-1.80567	#VALUE!	#VALUE!	-0.563733	3.20297	#VALUE!	#VALUE!	#VALUE!	#VALUE!	#VALUE!	#VALUE!	0.0820871	1.65097	0.199451	0.286109	0.0499668	-1.32991
AAHR _48h_02	AAHR _48h	0.524645	#VALUE!	-2.31338	-0.0889698	#VALUE!	1.53447	-1.50429	#VALUE!	-0.38342	#VALUE!	-1.07104	-0.0768729	-0.400696	0.269736	2.47649	0.488691	1.10415	0.236199	2.29171	#VALUE!	#VALUE!	-0.822056	#VALUE!	-2.8249	0.711669	1.17021	1.63815	#VALUE!	#VALUE!	0.0119511	0.553058	-2.81575	#VALUE!	#VALUE!	-0.804329	2.9339	#VALUE!	#VALUE!	#VALUE!	#VALUE!	#VALUE!	#VALUE!	-0.154295	1.54894	-0.432356	-0.0790703	-0.0750213	-1.14144
AAHR _48h_03	AAHR _48h	0.517114	#VALUE!	-2.48733	0.143468	#VALUE!	1.58029	-1.03445	#VALUE!	-0.221685	#VALUE!	-1.20786	-0.284299	-0.247891	1.54857	3.01403	0.826181	0.799276	0.0965819	2.54197	#VALUE!	#VALUE!	-1.20744	#VALUE!	-3.34116	1.09805	1.72863	1.57422	#VALUE!	#VALUE!	-0.0309379	0.282717	-3.13846	#VALUE!	#VALUE!	-0.42109	3.35244	#VALUE!	#VALUE!	#VALUE!	#VALUE!	#VALUE!	#VALUE!	0.184179	1.43027	0.274824	-0.17613	-0.21399	-2.63536
AAHR _48h_04	AAHR _48h	0.431061	#VALUE!	-1.9746	-0.207376	#VALUE!	0.768445	-1.1571	#VALUE!	-0.480899	#VALUE!	-1.57059	-0.231018	-0.316628	2.67777	2.18773	0.8863	-0.0156923	0.47827	2.88318	#VALUE!	#VALUE!	-1.19711	#VALUE!	-3.54808	0.996809	1.44929	1.65343	#VALUE!	#VALUE!	-0.195792	0.3352	-2.47071	#VALUE!	#VALUE!	-0.455516	3.04449	#VALUE!	#VALUE!	#VALUE!	#VALUE!	#VALUE!	#VALUE!	0.341898	1.51473	-0.00413415	0.0233251	0.00730131	-4.11431
AAHR _48h_05	AAHR _48h	0.731325	#VALUE!	-2.24673	0.142595	#VALUE!	0.818221	-1.16608	#VALUE!	-0.501834	#VALUE!	-1.48596	-0.0878628	-0.0655036	2.53843	2.4677	0.946039	0.42681	0.615068	2.80312	#VALUE!	#VALUE!	-0.985611	#VALUE!	-3.67681	1.164	1.85406	1.58703	#VALUE!	#VALUE!	-0.190611	0.169859	-3.16571	#VALUE!	#VALUE!	-0.40165	2.85592	#VALUE!	#VALUE!	#VALUE!	#VALUE!	#VALUE!	#VALUE!	0.271541	1.3809	0.277731	-0.255184	-0.253874	-3.33314
AAHR _48h_06	AAHR _48h	0.641324	#VALUE!	-2.22469	0.443949	#VALUE!	0.974264	-1.18763	#VALUE!	-0.44439	#VALUE!	-0.781725	-0.149905	-0.322489	2.38987	2.72082	0.97586	0.319686	0.329353	2.60583	#VALUE!	#VALUE!	-1.11826	#VALUE!	-1.19443	1.3912	1.89035	1.66387	#VALUE!	#VALUE!	-0.153784	0.0782441	-1.48831	#VALUE!	#VALUE!	-0.272461	3.00762	#VALUE!	#VALUE!	#VALUE!	#VALUE!	#VALUE!	#VALUE!	0.263831	1.50819	0.319442	0.0346221	0.0912936	-3.31068
BRST _48h_01	BRST _48h	-0.369088	#VALUE!	2.05374	-0.571475	#VALUE!	0.659958	2.17113	#VALUE!	-0.0153431	#VALUE!	0.262353	-0.0531095	-0.614103	1.11392	-0.0909663	-0.589098	0.990119	-0.317611	-0.0960694	#VALUE!	#VALUE!	-0.561623	#VALUE!	-4.17151	1.28326	-0.471855	1.67903	#VALUE!	#VALUE!	-0.147036	0.0122248	-4.78534	#VALUE!	#VALUE!	-0.126945	2.57144	#VALUE!	#VALUE!	#VALUE!	#VALUE!	#VALUE!	#VALUE!	0.00658943	0.900165	-0.0249867	0.270158	-2.15906	-2.00744
BRST _48h_02	BRST _48h	-0.291229	#VALUE!	2.26	-0.225216	#VALUE!	1.16113	2.43448	#VALUE!	-0.0484827	#VALUE!	0.661805	-0.0912162	-0.603482	0.766719	-0.113611	-0.352934	1.25598	-0.231078	0.0114642	#VALUE!	#VALUE!	-0.639961	#VALUE!	-7.16029	1.29775	-0.576887	1.62131	#VALUE!	#VALUE!	0.059185	-0.161981	-4.34402	#VALUE!	#VALUE!	0.0777048	2.75842	#VALUE!	#VALUE!	#VALUE!	#VALUE!	#VALUE!	#VALUE!	-0.00428259	0.93062	-0.01835	0.5615	-1.90614	-3.29526
BRST _48h_03	BRST _48h	-0.337048	#VALUE!	1.85825	-0.52522	#VALUE!	1.51852	2.04473	#VALUE!	0.0105557	#VALUE!	0.131265	-0.241968	-0.521194	2.08064	-0.827604	-0.654263	0.744995	-0.399751	-0.189337	#VALUE!	#VALUE!	-0.388685	#VALUE!	-4.53856	1.13458	-0.561487	1.57704	#VALUE!	#VALUE!	-0.143303	0.0649433	-4.13194	#VALUE!	#VALUE!	-0.205618	2.54789	#VALUE!	#VALUE!	#VALUE!	#VALUE!	#VALUE!	#VALUE!	0.140135	1.42141	-0.0366285	0.014057	-2.19987	-1.90004
BRST _48h_04	BRST _48h	-0.455326	#VALUE!	1.97668	-0.243001	#VALUE!	1.20096	1.86322	#VALUE!	-0.0191984	#VALUE!	0.660132	-0.0185299	-0.4997	1.36005	-0.103527	-0.779667	0.74787	-0.540563	-0.306996	#VALUE!	#VALUE!	0.218197	#VALUE!	-5.11367	1.18883	-0.0305965	1.63226	#VALUE!	#VALUE!	0.0317019	0.0408534	-3.86864	#VALUE!	#VALUE!	-0.225903	2.7423	#VALUE!	#VALUE!	#VALUE!	#VALUE!	#VALUE!	#VALUE!	0.00921275	1.4744	0.229297	0.328317	-2.02072	-1.67197
BRST _48h_05	BRST _48h	-0.196461	#VALUE!	2.13892	-0.188734	#VALUE!	1.46129	2.17413	#VALUE!	0.0190404	#VALUE!	0.460181	-0.0307622	-0.489191	1.94252	-0.48548	-0.525077	0.904371	-0.215453	0.105086	#VALUE!	#VALUE!	-0.444943	#VALUE!	-3.65	1.1657	-0.271162	1.67446	#VALUE!	#VALUE!	0.00484678	-0.179146	-4.56613	#VALUE!	#VALUE!	-0.0939831	2.82319	#VALUE!	#VALUE!	#VALUE!	#VALUE!	#VALUE!	#VALUE!	0.0946222	1.05119	0.257402	0.42363	-1.98491	-2.39727
BRST _48h_06	BRST _48h	-0.37573	#VALUE!	2.02675	-0.45934	#VALUE!	1.31467	2.23297	#VALUE!	0.0982333	#VALUE!	0.651498	-0.0154805	-0.662264	0.605446	-0.600843	-0.485908	1.17109	-0.341367	-0.0660957	#VALUE!	#VALUE!	-0.719394	#VALUE!	-3.703	0.634459	-0.468283	1.60492	#VALUE!	#VALUE!	-0.112396	-0.0198574	-4.86629	#VALUE!	#VALUE!	-0.0476566	2.42934	#VALUE!	#VALUE!	#VALUE!	#VALUE!	#VALUE!	#VALUE!	0.0444351	1.32411	0.0403231	-0.267223	-1.98372	-2.80424
GLYA _48h_01	GLYA _48h	0.231809	#VALUE!	0.153425	-1.77669	#VALUE!	1.83602	-0.14201	#VALUE!	-0.141949	#VALUE!	-0.271151	0.156945	-1.32673	-0.259855	0.658635	-1.27515	-0.0273668	-1.49388	0.902539	#VALUE!	#VALUE!	0.263496	#VALUE!	-1.27715	1.67383	-1.67646	1.57924	#VALUE!	#VALUE!	0.312973	-0.122848	-1.6821	#VALUE!	#VALUE!	-1.86672	-1.88812	#VALUE!	#VALUE!	#VALUE!	#VALUE!	#VALUE!	#VALUE!	0.374158	1.06879	-0.257377	0.915401	-0.986196	-1.54951
GLYA _48h_02	GLYA _48h	0.388081	#VALUE!	0.0936625	-1.3928	#VALUE!	2.12613	-0.214129	#VALUE!	-0.157939	#VALUE!	-0.448106	0.249054	-1.07771	0.601478	1.76624	-0.791512	1.23928	-1.0662	1.2607	#VALUE!	#VALUE!	0.370279	#VALUE!	-1.54492	1.72616	-0.887808	1.74565	#VALUE!	#VALUE!	0.534178	-0.688586	-1.65739	#VALUE!	#VALUE!	-1.2534	-1.76723	#VALUE!	#VALUE!	#VALUE!	#VALUE!	#VALUE!	#VALUE!	0.462045	1.27971	0.0441257	1.867	-1.01392	-2.64506
GLYA _48h_03	GLYA _48h	0.672808	#VALUE!	-0.136669	-1.0575	#VALUE!	1.31253	-0.0228622	#VALUE!	0.0243954	#VALUE!	-0.446044	0.157319	-1.65385	-0.678814	2.10155	-0.605378	1.13059	-1.01544	1.27725	#VALUE!	#VALUE!	0.412483	#VALUE!	-1.44601	1.37993	-0.701765	1.50342	#VALUE!	#VALUE!	0.0282989	-0.723973	-1.48205	#VALUE!	#VALUE!	-1.03705	-1.70856	#VALUE!	#VALUE!	#VALUE!	#VALUE!	#VALUE!	#VALUE!	-0.0361177	1.13903	0.0632373	1.71602	-0.344073	-2.83084
GLYA _48h_04	GLYA _48h	0.119748	#VALUE!	-0.0512036	-1.0175	#VALUE!	1.3707	-0.0309282	#VALUE!	-0.235046	#VALUE!	-0.768837	0.1045	-1.49951	0.217037	2.04625	-0.638555	0.612971	-1.21338	1.3593	#VALUE!	#VALUE!	0.344238	#VALUE!	-1.35065	1.51373	-0.78046	1.48446	#VALUE!	#VALUE!	0.162573	-0.254998	-1.48226	#VALUE!	#VALUE!	-1.1516	-1.89868	#VALUE!	#VALUE!	#VALUE!	#VALUE!	#VALUE!	#VALUE!	0.27303	1.00608	-0.0200874	1.37992	-0.726542	-2.37096
GLYA _48h_05	GLYA _48h	0.623205	#VALUE!	0.136782	-1.36801	#VALUE!	1.69071	0.0415535	#VALUE!	0.060406	#VALUE!	0.118987	0.107588	-1.53454	-1.77308	1.24936	-0.841562	0.561991	-0.963984	1.28538	#VALUE!	#VALUE!	0.430527	#VALUE!	-0.746632	1.50742	-1.00931	1.63778	#VALUE!	#VALUE!	0.129126	-0.626359	-1.46489	#VALUE!	#VALUE!	-1.3205	-1.91322	#VALUE!	#VALUE!	#VALUE!	#VALUE!	#VALUE!	#VALUE!	0.245458	1.23061	-0.0585244	1.75242	-0.519143	-3.27026
GLYA _48h_06	GLYA _48h	0.195979	#VALUE!	0.20148	-1.89099	#VALUE!	1.6448	-0.027674	#VALUE!	-0.157276	#VALUE!	-1.01939	0.282882	-1.27609	0.0587881	0.578051	-1.28104	0.655804	-1.42145	0.956223	#VALUE!	#VALUE!	0.303695	#VALUE!	-1.94751	1.48823	-1.65396	1.57997	#VALUE!	#VALUE!	0.287488	-0.0671132	-1.62623	#VALUE!	#VALUE!	-1.80758	-1.98729	#VALUE!	#VALUE!	#VALUE!	#VALUE!	#VALUE!	#VALUE!	0.432908	1.0465	-0.24827	1.54995	-1.28063	-1.29106
QQrB_48h_01	QQrB_48h	0.0618218	#VALUE!	-6.26284	0.477892	#VALUE!	-0.477822	-0.0798173	#VALUE!	-0.224834	#VALUE!	-0.0672252	-0.281705	-0.267071	-3.64165	0.0351574	0.153511	0.100853	0.671341	0.290555	#VALUE!	#VALUE!	-0.0749359	#VALUE!	-0.0661641	-0.0839776	-0.177704	0.148294	#VALUE!	#VALUE!	0.132355	0.0275826	-0.0227388	#VALUE!	#VALUE!	0.138703	0.0300204	#VALUE!	#VALUE!	#VALUE!	#VALUE!	#VALUE!	#VALUE!	-0.791726	0.253988	-0.101986	-0.218349	0.743179	-0.952666
QQrB_48h_02	QQrB_48h	0.125157	#VALUE!	-0.0311513	0.54014	#VALUE!	-0.604109	-0.268406	#VALUE!	-0.155163	#VALUE!	0.167116	-0.126105	-0.157598	0.403719	0.188269	0.0186636	0.150956	0.381514	-0.0246184	#VALUE!	#VALUE!	0.0954535	#VALUE!	0.390298	0.240212	-0.0647612	0.158753	#VALUE!	#VALUE!	0.232638	-0.150603	0.223491	#VALUE!	#VALUE!	0.123043	0.700555	#VALUE!	#VALUE!	#VALUE!	#VALUE!	#VALUE!	#VALUE!	-0.180696	0.0466225	0.00304516	0.123942	0.354005	-0.498313
QQrB_48h_03	QQrB_48h	0.0738494	#VALUE!	0.0900114	0.579733	#VALUE!	0.144162	-0.0892174	#VALUE!	-0.214558	#VALUE!	-0.0970522	-0.312294	-0.169112	-0.0907233	-0.180256	0.118339	0.132659	0.395801	-0.0741077	#VALUE!	#VALUE!	-0.0736862	#VALUE!	-0.255958	-0.146018	-0.0240156	0.461289	#VALUE!	#VALUE!	0.21493	-0.0181879	-0.23777	#VALUE!	#VALUE!	0.132896	0.406099	#VALUE!	#VALUE!	#VALUE!	#VALUE!	#VALUE!	#VALUE!	-0.0903619	0.148825	0.0673794	-0.0732535	0.0697953	-0.642696
QQrB_48h_04	QQrB_48h	0.00998891	#VALUE!	0.172966	0.94249	#VALUE!	-0.03901	0.0653847	#VALUE!	0.268425	#VALUE!	-0.00888841	-0.169527	-0.117877	0.590021	0.124224	0.173592	0.311631	0.416066	0.116878	#VALUE!	#VALUE!	-0.144726	#VALUE!	-0.364833	-0.324185	-0.00136699	0.013975	#VALUE!	#VALUE!	0.176508	-0.0737049	-0.352069	#VALUE!	#VALUE!	0.150837	0.0847217	#VALUE!	#VALUE!	#VALUE!	#VALUE!	#VALUE!	#VALUE!	-0.147674	-0.0849377	0.00285968	0.0446667	0.201757	-0.787139
QQrB_48h_05	QQrB_48h	0.132341	#VALUE!	0.172209	0.881316	#VALUE!	1.15957	0.0230022	#VALUE!	0.503126	#VALUE!	0.152815	-0.130947	-0.0283615	0.858412	-0.0667114	-0.395996	0.518552	0.178459	-0.157835	#VALUE!	#VALUE!	0.155889	#VALUE!	-0.670329	0.358655	0.00306025	0.288958	#VALUE!	#VALUE!	0.358614	-0.0882795	-0.50638	#VALUE!	#VALUE!	-0.384651	0.225759	#VALUE!	#VALUE!	#VALUE!	#VALUE!	#VALUE!	#VALUE!	0.050928	0.0875659	0.0164884	0.736586	-0.337363	0.828321
QQrB_48h_06	QQrB_48h	0.230077	#VALUE!	-0.331103	0.626512	#VALUE!	-0.667294	-0.387131	#VALUE!	-0.259061	#VALUE!	-0.248698	-0.125524	-0.281649	0.212991	-0.630444	-0.185832	0.175143	0.58379	0.246443	#VALUE!	#VALUE!	0.0549696	#VALUE!	0.301524	0.211885	-0.101819	0.00361326	#VALUE!	#VALUE!	0.241431	-0.140641	0.177699	#VALUE!	#VALUE!	-0.16887	0.353033	#VALUE!	#VALUE!	#VALUE!	#VALUE!	#VALUE!	#VALUE!	-0.26969	-0.0696498	-0.0182859	0.0572954	0.264301	0.0486812
[truncated: 138 more columns]

## Sheet: Abbreviations
Metformin		METF			CI	Complex I inhibitors						2',3'-cyclic AMP	2,3-cAMP
Rotenone		ROTN			CII	Complex II inhibitors						2-phosphoglycolic acid	2PG
Malonic acid		MALO			CIII	Complex III inhibitors						glycerate 2-phosphate	2PGA
3-Nitropropionic acid		3-NP			CIV	Complex IV inhibitors						3',5'-cyclic AMP	3,5-cAMP
Atovaquone		ATOV			Uncoupler	Uncoupler						3-dehydroshikimate	3DeHy-SHIK
Antimycin A		AMYC			Akt	AKT inhibitors						3-hydroxypyruvic acid	3-OH-PYR
Potassium cyanide		CYAN			mTOR	mTOR						3-phosphoglycerate	3PGA
Sodium azide		AZID			FAB	Fatty acid biosynthesis inhibitors						5-methyltetrahydrofolate	5Me-THF
2,4-Dinitrophenol		2DNP			GDH	Glutamate dehydrogenase inhibitors						6-phosphogluconic acid	6PG
Carbonyl cyanide m-chlorophenyl hydrazone		CCCP			HMG-CoAr	HMG-CoA reductase inhibitors						8-hydroxycopalyl diphosphate	8OH-COPA-PP
Emodin		EMOD			NAMPT	NAD salvage						acetoacetyl-CoA	AcAc-CoA
Mitoxantrone		MITO			OPP	Inhibitor of oxidative pentose phosphate pathway						acetyl-CoA	AcCoA
Doxorubicin		DOXO			PLB	Phospholipid biosynthesis						aconitic acid	ACT
Etoposide		ETOP			TopoI	Topoisomerase I inhibitors						adenosine	Adenosine
Irinotecan		IRIN			TopoII	Topoisomerase II inhibitors						adenylosuccinic acid	Adenylo-Suc
Camptothecin		CMPT										adenosine 5'-diphosphate	ADP
Lovastatin		LOVA										ADP-glucose	ADP-glucose
Atorvastatin		ATOR										ADP-ribose 2'-phosphate	ADPPR
Fluvastatin		FLUV										ADP-D-ribose	ADPR
Daporinad		FK866										AICA ribonucleotide	AICAR
GMX1778		GMX										5-aminoimidazole ribonucleotide	AIR
GNE617		GNE										2-ketoglutaric acid	2-OG
6-Aminonicotinamide		6ANA										L-alanine	ALA
G6Pi		GPDi										allantoic acid	ALLANTOATE
Paclitaxel		PTXL										allantoin	ALT
Vincristin		VINC										adenosine 5'-monophosphate	AMP
Epigallocatechin gallate		EGCG										L-arginine	ARG
Apigenin		APIG										ascorbic acid	ASC
Perifosine		PRFN										L-asparagine	ASN
Oridonin		ORID										L-aspartic acid	ASP
Rapamycin		RAPA										adenosine triphosphate	ATP
Alpelisib		ALPL										ureidosuccinic acid	CA
Wortmannin		WRTN										carboxyaminoimidazole ribotide	CAIR
Hexachlorophene		HEXA										3-ureidopropionic acid	CarbamoylAla
Bithionol		BITN										cytidine 5'-diphosphate	CDP
Betulinic acid		BETA										CDP-choline	CDP-CHOL
11-Keto-beta-boswellic acid		BOWA										4-diphosphocytidyl-2-C-methyl-D-erythritol	CDP-ME
Maslinic acid		MASA										4-CDP-2-C-methyl-D-erythritol 2-phosphate	CDP-MEP
Breastin		BRST										3',5'-cyclic GMP	cGMP
Cucurbitacin B		QQrB										chloride	chloride
Glycyrrhetinic acid		GLYA										chorismic acid	CHOR
												chorismic acid	CHOR-H2O
												citric acid	CIT
												L-citrulline	CITRUL
												cytidine 5'-monophosphate	CMP
												coenzyme A	CoA
												creatine	CREA
												phosphocreatine	CREA-P
												cytidine triphosphate	CTP
												L-cysteine	CYS
												L-cystine	CYSN
												cytidine	Cytidine
												2'-deoxyadenosine	dADO
												2'-deoxyadenosine-5'-diphosphate	dADP
												2'-deoxyadenosine-5'-monophosphate	dAMP
												deoxyadenosine triphosphate	dATP
												dehydroascorbic acid	DeHyASC
												2'-deoxyguanosine 5'-monophosphate	dGMP
												deoxyguanosine	dGUA
												dihydroxyacetone phosphate	DHAP
												dihydroorotic acid	DHO
												digalacturonic acid	DIGALACTURON
												disccharides_sum	Disccharides_sum
												dimethylallyl diphosphate	DMA-PP
												deoxyribose 5-phosphate	dR5P
												thymidine-5'-diphosphate	dTDP
												thymidine 5'-monophosphate	dTMP
												thymidine-5'-triphosphate	dTTP
												1-deoxy-D-xylulose 5-phosphate	dXP
												erythrose 4-phosphate	E4P
												fructose 6-phosphate	F6P
												flavin adenine dinucleotide	FAD
												FAICAR	FAICAR
												fructose-1,6-diphosphate	FBP
												5-phosphoribosyl-N-formylglycineamidine	FGAM
												5'-phosphoribosyl-N-formylglycineamide	FGAR
												flavin mononucleotide	FMN
												farnesyl diphosphate	FPP
												fumaric acid	FUM
												glucose-1-phosphate	G1P
												glucose-6-phosphate	G6P
												glucosamine 1-phosphate	GA1P
												glucosamine 6-phosphate	GA6P
												gamma-aminobutyric acid	GABA
												D-galactonic acid	GALACTON
												D-galacturonic Acid	GALACTURON
												glycerinaldehye 3-phosphate	GAP
												5'-phosphoribosylglycineamide	GAR
												guanosine diphosphate	GDP
												geranylgeranyl pyrophosphate	GGPP
												L-glutamic acid	GLA
												glycerophosphoric acid	GLC3P
												L-glutamine	GLN
												gluconic acid	GLUCON
												D-glucuronic Acid	GLUCURON
												glycine	GLY
												glycolic acid	GLYCOLATE
												glyoxylic acid	GLYOX
												guanosine-5'-monophosphate	GMP
												geranyl diphosphate	GPP
												glutathione	GSH
												glutathione disulfide	GSSG
												guanosine triphosphate	GTP
												guanosine	Guanosine
												hexose_sum	Hexoses
												L-histidine	HIS
												(2E)-4-hydroxy-3-methylbut-2-enyl diphosphate	HMBPP
												hydroxymethylglutaryl-CoA	HMG-CoA
												inosine 5'-monophosphate	IMP
												D-myo-inositol trikisphosphates (sum)	IP3_sum
												D-myo-inositol tetrakisphosphates (sum)	IP4_sum
												D-myo-inositol pentakisphosphates (sum)	IP5_sum
												phytic acid	IP6
												Isopentenyl pyrophosphate	IPPP
												isocitric acid	ISOCIT
												isovaleryl-coenzyme A	ISOVAL-CoA
												2-keto-3-deoxy-6-phosphogluconate	KDPG
												lactic acid	LAC
												L-leucine+L-isoleucine (sum)	LEU+ILE
												L-leucine+L-isoleucine (sum)	LEU+ILE
												L-lysine	LYS
												malic acid	MAL
												malonyl-CoA	Malo-CoA
												2C-methyl-D-erythritol 2,4-cyclodiphosphate	MEcPP
												3-methylcrotonyl CoA	MeCrot-CoA
												methyl-D-erythritol Phosphate	MEP
												methionine	MET
												mevalonic acid	MEVA
												mevalonate-P	MEVA5P
												mevalonate-5PP	MEVA5PP
												methylmalonyl coa	MM-CoA
												nicotinic acid	NA
												nicotinate mononucleotide	NAAM
												NAD+	NAD+
												NADH	NADH
												NADP+	NADP+
												NADPH	NADPH
												nicotinamide	nicotinamide
												nicotinamide mononucleotide	NMN
												L-ornithine	ORN
												orotic acid	ORO
												orotidylic acid	ORO5P
												oxaloacetic acid	Oxaloacetic acid
												oxaloacetic acid_2	Oxaloacetic acid_2
												D-pantothenic acid	PAN
												O-phosphoethanolamine	PEA
												sum of valeric acid, isovaleric, anteisovaleric acid	pentanoates
												phosphoenolpyruvate	PEP
												phenylalanine	PHE
												phosphate	phosphate
												phosphoribosylamine	PRA
												L-proline	PRO
												PRPP	PRPP
												pyruvic acid	PYR
												quinic acid	QUIN
												ribose-1-phosphate	R1P
												ribose phosphate	R5P
												D-ribonic acid	RA
												D-ribulose 1,5-Bisphosphate	RIB1,5 BP
												ribulose 5-phosphate+xylolose 5-phosphate (sum)	RIBU5P+XU5P
												sedoheptulose 1,7-bisphosphate	S1,7BP
												sedoheptulose 7-phosphate	S7P
												S-adenosylhomocysteine	SAH
												SAICAR	SAICAR
												L-serine	SER
												shikimic acid	SHIK
												succinic acid	SUC
												succinyl-coenzyme A	Succ-CoA
												sulfate	sulfate
												L-threonine	THR
												trigalacturonic acid	TRIGALACTURON
												L-tryptophan	TRP
												L-tyrosine	TYR
												uric acid	UA
												uridine 5'-diphosphate	UDP
												UDP-glucose	UDP-glc
												UDP-N-acetyl-alpha-D-glucosamine	UDP-NAcGA
												uridine 5'-monophosphate	UMP
												uridine	Uridine
												uridine 5'-triphosphate	UTP
												L-valine	VAL
												L-valine	VAL
												xanthosine monophosphate	XAN5P
												tetrahydrofolic acid	THF
												folic acid	Folate
												5-formyltetrahydrofolic acid	5-Formyl-THF
